# Supplementary material for: Crop-Zone Weed Mycobiomes of the South-Western Australian Grain Belt
Source: Front Microbiol. 2020 Nov 24;11:581592. doi: 10.3389/fmicb.2020.581592 (PMC7721668; doi:10.3389/fmicb.2020.581592)
Supplement: Supplementary Table 2 — Assignment of taxa to OTUs via BLAST. [file Table_2.XLSX]

## Sheet: Host Species
taxid	parent_taxid	rank	scientific name	common name	synonym	anamorph	authority	Arctotheca calendula (L.) Levyns	Avena fatua L.	Bromus sp.	Echium plantagineum L.	Emex australis Steinh.	Erodium botrys (Cav.) Bertol.	Hordeum vulgare L.	Hypochaeris radicata L.	Lolium rigidum Gaudin	Oxalis pes-caprae L.	Raphanus raphanistrum L.	Vulpia sp.
1	1	no rank	root		all			1	1	1	1	1	1	1	1	1	1	1	1
2759	131567	superkingdom	Eukaryota	eukaryotes	Eucarya;Eucaryotae;Eukarya;Eukaryotae			1	1	1	1	1	1	1	1	1	1	1	1
3042	3166	order	Chlamydomonadales		Chlorococcales;Volvocales;Volvocida			0.285714	0	0	0.5	0	0	0	0	0.214286	0	0	0
3052	3051	genus	Chlamydomonas					0	0	0	0	0	0	0	0	0.214286	0	0	0
3542	3524	family	Aizoaceae	iceplant family			Aizoaceae Martinov, 1820	0	0	0	0	0	0	0	0	0.0714286	0	0	0
3618	1110386	genus	Rumex				Rumex L., 1753	0	0	0	0	1	0	0	0	0	0	0	0
3700	3699	family	Brassicaceae		Cruciferae		Brassicaceae Burnett, 1835	0.0714286	0.0769231	0.25	0	0.333333	0	0	0	0.142857	0	1	0.5
3705	981071	genus	Brassica				Brassica L., 1753	0.0714286	0	0.25	0	0	0	0	0	0	0	0.916667	0
3725	981071	genus	Raphanus				Raphanus L.	0	0	0	0	0	0	0	0	0	0	0.166667	0
4496	640623	genus	Avena				Avena L., 1753	0	0.923077	0.5	0.5	0	0	0	0	0	0	0.0833333	0
4501	147388	genus	Bromus				Anisantha K.Koch, 1848;Bromus L., 1753	0	0.307692	0.25	0	0	0	0	0	0.0714286	0	0	0
4512	1648017	genus	Hordeum	barleys			Hordeum L., 1753	0	0	0.25	0	0	0	1	0	0	0	0	0
4520	640630	genus	Lolium				Lolium L., 1753	0	0	0	0	0	0	0	0	0.857143	1	0	0
4751	33154	kingdom	Fungi					1	1	1	1	1	1	1	1	1	1	1	1
4815	34479	genus	Spizellomyces					0.0714286	0	0	0	0	0	0	0	0.0714286	0	0.0833333	0
4855	4854	genus	Mortierella					0	0	0	0	0	0	0	0.125	0	0	0	0
4890	451864	phylum	Ascomycota	sac fungi				1	1	1	1	1	0.75	1	1	1	1	1	1
4927	599737	species	Wickerhamomyces anomalus		Candida pelliculosa;Endomyces anomalus;Hansenula anomala;Pichia anomalus;Saccharomyces anomalus;Willia anomala		Saccharomyces anomalus E.C. Hansen, 1889;Wickerhamomyces anomalus (E.C. Hansen) Kurtzman, Robnett & Basehoar-Powers, 2008	0	0	0	0	0	0	0	0	0.0714286	0	0	0
4930	4893	genus	Saccharomyces		Pachytichospora			0.214286	0	0	0	0	0	0	0	0.0714286	0	0.0833333	0
4958	766764	genus	Debaryomyces		Wingea			0	0	0	0	0	0	1	0	0	0	0.166667	0
4970	1905116	genus	Bullera					0.142857	0.153846	0	0	0	0	0	0.125	0.142857	0	0	0
4972	165440	species	Dioszegia hungarica		Bullera armeniaca;Cryptococcus hungaricus			0.214286	0.384615	0	0	0	0.25	0	0.375	0.5	0	0.166667	0
4988	1798865	genus	Bensingtonia					0.142857	0.230769	0.25	0	0	0	0	0.375	0.0714286	0	0.416667	0
4990	1798857	species	Pseudobensingtonia ingoldii		Bensingtonia ingoldii		Pseudobensingtonia ingoldii (Nakase & Itoh.) F.Y. Bai, Q.M. Wang, M. Groenew. & Boekhout, 2015	0	0.0769231	0	0	0	0.25	0	0	0.0714286	0	0	0
4998	1910893	genus	Kockovaella					0	0.153846	0	0	0	0.25	1	0	0	0	0	0
5010	5009	genus	Taphrina		Lalaria			0	0	0	0	0	0	0	0	0.0714286	0	0	0
5014	451867	order	Dothideales					1	1	1	1	1	0.5	1	0.875	1	1	1	1
5020	715340	family	Phaeosphaeriaceae					1	1	1	1	1	0.5	1	1	1	1	1	1
5021	34374	genus	Leptosphaeria					0.214286	0.230769	0.25	0	0.333333	0.25	1	0.375	0.428571	0	0.333333	0
5022	220671	species	Leptosphaeria maculans	blackleg of canola fungus;blackleg of crucifers fungus	Leptosphaeria sp. JW-2011m	Phoma lingam		0.214286	0.0769231	0.25	0	0	0	0	0.25	0.214286	0	0.166667	0
5023	1111111	family	Venturiaceae					0.5	0.230769	0.25	0	0	0.25	1	0.25	0.214286	0	0.166667	1
5024	5023	genus	Venturia					0.428571	0.153846	0.25	0	0	0	1	0.25	0.142857	0	0.166667	0
5027	28556	genus	Pyrenophora					0.5	0.615385	0.75	0.5	0	0.5	0	0.25	0.5	0	0.333333	0.5
5032	62917	genus	Microstroma					0.0714286	0	0	0	0	0	0	0	0	0	0	0
5042	451871	order	Eurotiales		Elaphomycetales			0.142857	0.384615	0.25	0	0	0	0	0.25	0.357143	0	0.25	0.5
5052	1131492	genus	Aspergillus		Petromyces			0.0714286	0.0769231	0	0	0	0	0	0.125	0.285714	0	0.0833333	0.5
5073	1131492	genus	Penicillium		Eupenicillium			0.0714286	0.153846	0.25	0	0	0	0	0.25	0.142857	0	0.0833333	0
5094	28568	genus	Talaromyces					0	0.0769231	0	0	0	0	0	0	0.0714286	0	0	0
5104	5103	genus	Ascosphaera					0	0	0	0	0	0	0	0.125	0	0	0	0
5112	34397	genus	Epichloe					0	0	0	0	0	0	0	0	0.0714286	1	0	0
5114	222544	order	Diaporthales					0.857143	0.769231	0.5	1	1	0.5	1	0.75	1	1	0.833333	0.5
5117	5114	family	Valsaceae					0.357143	0.615385	0.25	1	0.333333	0	0	0.125	0.642857	1	0.25	0
5125	222543	order	Hypocreales					1	1	1	1	1	0.5	1	1	1	1	0.916667	1
5129	5125	family	Hypocreaceae		anamorphic Hypocreaceae			0.142857	0.230769	0.25	0.5	0.333333	0	0	0.375	0.357143	1	0.166667	0.5
5139	222544	order	Sordariales					0.642857	0.461538	0.5	1	0.333333	0	1	0.625	0.571429	1	0.75	0.5
5144	42302	genus	Podospora					0.142857	0.0769231	0	0.5	0	0	0	0	0	0	0	0
5146	5148	genus	Sordaria					0	0.0769231	0	0	0	0	0	0	0	0	0	0
5148	5139	family	Sordariaceae					0.0714286	0.153846	0.25	0.5	0	0	0	0.25	0.142857	1	0.25	0.5
5149	35718	genus	Chaetomium					0.285714	0	0	0	0	0	0	0	0.0714286	0	0.166667	0
5178	147548	order	Helotiales		Leotiales			0.785714	0.615385	0.75	1	0.666667	0.25	0	1	0.714286	1	0.666667	1
5181	5178	family	Helotiaceae					0.214286	0.307692	0.5	0.5	0.333333	0.25	0	0.625	0.5	0	0.5	0.5
5185	147549	order	Pezizales					0.714286	0.307692	0	1	0.666667	0.25	1	0.375	0.428571	1	0.333333	0
5186	5185	family	Pezizaceae					0.571429	0.307692	0	1	0.333333	0.25	1	0.375	0.428571	1	0.25	0
5198	157822	family	Cladoniaceae					0	0	0	0	0	0	0	0	0.0714286	0	0	0
5204	451864	phylum	Basidiomycota					1	1	1	1	1	0.75	1	1	1	1	1	1
5206	1884633	genus	Cryptococcus		Filobasidiella			1	1	0.75	1	1	0.5	1	1	1	1	1	1
5209	5408	genus	Filobasidium					1	1	1	1	1	0.5	1	1	1	1	1	1
5211	1851566	species	Piskurozyma capsuligena		Filobasidium capsuligenum;Leucosporidium capsuligenum		Filobasidium capsuligenum (Fell, Statzell, I.L. Hunter & Phaff) Rodr. Mir., 1972;Leucosporidium capsuligenum Fell, Statzell, I.L. Hunter & Phaff, 1969;Piskurozyma capsuligena (Fell, Statzell, I.L. Hunter & Phaff) A.M. Yurkov, 2016	0.0714286	0	0	0	0	0	0	0	0	0	0.0833333	0
5220	1890237	genus	Trimorphomyces					0.214286	0.0769231	0	0.5	0	0	0	0.25	0.0714286	0	0.583333	0
5230	5227	genus	Auricularia					0	0	0	0.5	0	0	0	0	0	0	0	0
5234	155616	order	Tremellales					1	1	0.75	1	1	0.75	1	1	1	1	1	1
5238	5250	genus	Thanatephorus					0.0714286	0	0	0	0	0	0	0	0	0	0	0
5246	5245	genus	Septobasidium					0	0	0	0	0	0	0	0	0.142857	0	0	0
5250	36064	family	Ceratobasidiaceae					0.285714	0.307692	0	0	0	0.25	0	0.125	0.214286	0	0.0833333	0
5251	5250	genus	Ceratobasidium					0.142857	0.307692	0	0	0	0.25	0	0	0.0714286	0	0.0833333	0
5268	5267	family	Ustilaginaceae					0.0714286	0.0769231	0.25	0	0	0	0	0.125	0.214286	0	0	0
5269	5268	genus	Ustilago					0.0714286	0	0	0	0	0	0	0.125	0.0714286	0	0	0
5277	1163720	genus	Leucosporidium		Leucosporidiella;Mastigobasidium			0.928571	0.230769	0.5	0.5	0.666667	0.75	0	0.625	0.714286	0	0.25	0
5296	5262	genus	Puccinia					0.142857	0.384615	0.5	0.5	0	0	0	0.25	0.357143	0	0.333333	0
5297	5296	species	Puccinia graminis					0.0714286	0.0769231	0.25	0	0	0	0	0	0	0	0.0833333	0
5302	5204	subphylum	Agaricomycotina					1	1	1	1	1	0.75	1	1	1	1	1	1
5303	355688	order	Polyporales		Aphyllophorales			0.214286	0.538462	0.25	0	0.333333	0	0	0.5	0.285714	1	0.0833333	0
5304	452338	family	Corticiaceae					0.285714	0.384615	0.25	1	0.333333	0	1	0.375	0.285714	1	0.5	0
5305	396331	genus	Phanerochaete					0	0	0	0	0	0	0	0.25	0	0	0	0
5307	81064	genus	Phlebia					0.0714286	0.153846	0	0	0	0	0	0.125	0	0	0	0
5317	5303	family	Polyporaceae		Coriolaceae;Cryptoporaceae;Echinochaetaceae;Fomitaceae;Ganodermataceae;Grammotheleaceae;Haddowiaceae;Lentinaceae;Lentinaceae Julich, nom. inval.;Lophariaceae;Microporaceae;Pachykytosporaceae;Perenniporiaceae;Sparsitubaceae;Trametaceae			0	0.0769231	0	0	0.333333	0	0	0	0.0714286	0	0	0
5320	104366	genus	Pleurotus					0	0	0	0	0	0	1	0.125	0	0	0	0
5324	5317	genus	Trametes					0	0	0	0	0.333333	0	0	0	0	0	0	0
5338	452333	order	Agaricales		Agaricales anamorphs;Hymenogastrales;Lycoperdales;Nidulariales;Tulostomatales;anamorphic Agaricales			0.357143	0.384615	0.25	0.5	0.333333	0	1	0.25	0.571429	0	0.5	1
5340	5339	genus	Agaricus					0	0.0769231	0	0	0	0	0	0	0	0	0	0.5
5351	5338	family	Tricholomataceae					0.0714286	0.0769231	0	0	0	0	1	0	0.142857	0	0.0833333	0.5
5379	227336	genus	Suillus					0	0	0	0	0	0	0	0.125	0	0	0	0
5410	165808	genus	Cystofilobasidium					0.714286	0.538462	0.75	1	0	0.5	1	0.75	0.642857	0	0.833333	0
5413	165790	genus	Erythrobasidium					0.357143	0.384615	0	0	0.333333	0.25	0	0.625	0.214286	1	0.5	1
5414	5413	species	Erythrobasidium hasegawianum			Rhodotorula hasegawae		0.285714	0.230769	0	0	0.333333	0.5	0	0.5	0.214286	1	0.416667	1
5418	189450	species	Papiliotrema laurentii		Cryptococcus laurentii;Torula laurentii;Torulopsis laurentii		Papiliotrema laurentii (Kuff.) X.Z. Liu, F.Y. Bai, M. Groenew. & Boekhout, 2016	0	0	0	0	0	0	0	0	0.0714286	0	0.0833333	0
5427	5426	genus	Lycoperdon					0	0	0	0	0	0	0	0	0.0714286	0	0.0833333	0
5429	1799696	genus	Sporobolomyces					0.357143	0.307692	0.5	0.5	0	0.25	1	0.625	0.357143	1	0.416667	0
5434	1798808	species	Symmetrospora foliicola		Sporobolomyces foliicola		Symmetrospora foliicola (R.G. Shivas & Rodr. Mir.) Q.M. Wang, F.Y. Bai, M. Groenew. & Boekhout, 2015	0.214286	0.153846	0.25	0.5	0.333333	0.25	0	0	0.285714	0	0.25	0
5436	1799786	species	Chrysozyma griseoflava		Sporobolomyces griseoflavus		Chrysozyma griseoflava (Nakase & M. Suzuki) Q.M. Wang, F.Y. Bai, M. Groenew. & Boekhout, 2015	0.285714	0.153846	0	0	0	0	1	0	0	0	0.0833333	0
5455	681950	genus	Colletotrichum					0.714286	0.615385	0.75	1	0.666667	0.25	0	0.5	0.642857	1	0.583333	0.5
5468	189359	genus	Robillarda					0	0	0	0	0	0	0	0	0	0	0.0833333	0
5498	452563	genus	Cladosporium					1	1	1	1	1	0.5	1	1	1	1	1	1
5502	28556	genus	Curvularia					0.357143	0.0769231	0.25	0.5	0	0	0	0	0.142857	1	0.166667	0.5
5506	110618	genus	Fusarium		Gibberella			1	0.307692	0.5	1	1	0.5	1	0.75	1	1	0.833333	1
5531	1667166	genus	Myrothecium					0.928571	0.461538	0.75	1	0.666667	0.25	0	0.875	0.785714	1	0.5	0.5
5533	1799696	genus	Rhodotorula		Rhodosporidium			0.785714	0.538462	1	1	0	0.5	0	0.875	0.928571	1	0.666667	0.5
5537	5533	species	Rhodotorula mucilaginosa		Rhodotorula mucilaginosa var. mucilaginosa;Rhodotorula pilimanae;Rhodotorula rubra;Sporobolomyces albo-rubescens		Rhodotorula mucilaginosa (A. Jorg.) F.C. Harrison, 1928;Torula mucilaginosa A. Jorg., 1909	0	0.0769231	0	0	0	0	0	0	0.0714286	0	0	0
5538	221903	genus	Scytalidium					0	0	0	0	0	0	0	0.125	0	0	0	0
5543	5129	genus	Trichoderma		Aphysiostroma;Chromocrea;Creopus;Hypocrea;Pseudohypocrea;Sarawakus			0.142857	0.230769	0.25	0.5	0.333333	0	0	0.125	0.357143	1	0.0833333	0.5
5569	603431	genus	Cenococcum					0	0	0.25	0	0	0	0	0.125	0	0	0	0
5579	1570301	genus	Aureobasidium					1	1	1	1	1	0.5	1	0.875	1	1	1	1
5583	43219	genus	Exophiala		Nadsoniella;Wangiella			0.785714	0.461538	0.25	1	0.333333	0	0	0.625	0.5	1	0.416667	0
5587	43219	genus	Rhinocladiella					0	0.0769231	0	0	0	0	0	0.125	0.0714286	0	0	0
5598	28556	genus	Alternaria		Undifilum			1	1	1	1	1	0.5	1	1	1	1	1	1
5607	1910893	genus	Fellomyces					0	0	0	0	0	0.25	0	0	0	0	0	0
5615	48847	genus	Sterigmatomyces		Agaricostilbum			0	0	0	0	0	0	0	0.125	0	0	0	0
5909	5890	species	Tetrahymena rostrata				Tetrahymena rostrata Kahl, 1926	0	0	0	0	0	0	0	0	0.0714286	0	0	0
13201	1385565	genus	Phaeococcomyces					0.714286	0.461538	0.25	1	0.333333	0.25	0	0.5	0.5	1	0.583333	1
13289	5279	genus	Tilletia					0	0.0769231	0	0	0	0	0	0	0.0714286	0	0	0
13348	47021	genus	Arthrobotrys					0	0	0	0	0	0	0	0	0.0714286	0	0	0
15492	1648017	genus	Elymus				Elymus L., 1753	0	0	0.25	0	0	0	1	0	0	0	0	0
21555	4027	genus	Erodium				Erodium L'Her. ex Aiton	0	0	0	0	0	0.75	0	0	0.0714286	0	0	0
27311	27310	species	Cephaloascus fragrans					0	0	0	0	0	0	0	0	0	0	0	0
27312	29827	genus	Dipodascopsis					0	0	0	0	0	0	0	0	0.0714286	0	0	0
27331	27330	genus	Protomyces					0.428571	0.307692	0	0.5	0	0.25	0	0.5	0.357143	0	0.333333	0
27332	27331	species	Protomyces inouyei					0.214286	0.153846	0	0.5	0	0.25	0	0.25	0.285714	0	0.25	0
27344	5296	species	Puccinia coronata				Puccinia coronata Corda 1837	0.0714286	0.0769231	0.5	0	0	0	0	0	0.142857	0	0.0833333	0
28556	715340	family	Pleosporaceae		Pyrenophoraceae			1	1	1	1	1	0.5	1	1	1	1	1	1
28568	5042	family	Trichocomaceae		Eurotiaceae			0	0.0769231	0	0	0	0	0	0	0.0714286	0	0	0
28983	5178	family	Sclerotiniaceae					0.142857	0	0	0	0	0	0	0	0	0	0	0
29000	5204	subphylum	Pucciniomycotina		Urediniomycetes			1	0.846154	1	1	1	0.75	1	1	1	1	1	1
29002	93133	genus	Cercospora					0.428571	0.230769	0	0.5	0.333333	0.25	0	0.125	0.285714	0	0.333333	1
29820	5185	family	Sarcosomataceae					0	0	0	0	0.333333	0	0	0	0	0	0	0
29827	4892	family	Lipomycetaceae					0	0	0	0	0	0	0	0	0.0714286	0	0	0
29828	29827	genus	Lipomyces		Smithiozyma			0	0	0	0	0	0	0	0	0.0714286	0	0	0
33154	2759	no rank	Opisthokonta		Fungi/Metazoa group;opisthokonts		Opisthokonta Cavalier-Smith 1987	1	1	1	1	1	1	1	1	1	1	1	1
33183	451871	order	Onygenales		Gymnoascales			0	0	0	0	0.333333	0	0	0.125	0	0	0	0
33184	33183	family	Onygenaceae					0	0	0	0	0.333333	0	0	0.125	0	0	0	0
33194	28556	genus	Bipolaris					0.928571	1	1	0.5	1	0.25	1	0.75	1	1	1	1
33198	28556	genus	Drechslera					0.642857	0.692308	0.25	0.5	0.666667	0.5	1	0.75	0.857143	0	0.416667	0.5
33202	1131624	genus	Paecilomyces					0	0	0	0	0	0	0	0	0	0	0.0833333	0
34373	34372	species	Blumeria graminis	grass mildew	Erysiphe graminis			0.142857	0.153846	0.25	0	0	0	0	0	0	0	0.25	0.5
34374	715340	family	Leptosphaeriaceae		Leptosphaeriaceae anamorphs;anamorphic Leptosphaeriaceae			0.571429	0.384615	0.75	1	0.666667	0.25	1	0.625	0.642857	0	0.916667	0
34379	221903	family	Pseudeurotiaceae					0.0714286	0.0769231	0	0	0	0	0	0.125	0.0714286	0	0	0
34395	451870	order	Chaetothyriales					0.928571	0.692308	0.25	1	0.333333	0.5	0	1	1	1	0.916667	1
34397	5125	family	Clavicipitaceae					0	0	0.25	0	0	0	0	0	0.0714286	1	0.0833333	0
34399	5117	genus	Phomopsis					0.0714286	0.0769231	0	0.5	0	0	0	0	0.0714286	0	0	0
34416	55071	genus	Microbotryum					0.0714286	0.0769231	0	0	0	0	0	0.125	0.0714286	0	0	0
34419	162483	genus	Colacogloea					0.0714286	0.0769231	0	0	0	0	0	0	0.0714286	0	0	0
34426	5226	family	Exidiaceae					0.142857	0	0.25	0	0	0	0	0	0.0714286	0	0.0833333	0
34448	654128	genus	Marasmius					0	0.0769231	0	0.5	0	0	0	0	0.0714286	0	0	0
35718	5139	family	Chaetomiaceae					0.571429	0.230769	0.25	0.5	0.333333	0	1	0.25	0.357143	0	0.583333	0
35724	45131	genus	Macrophomina					0.142857	0	0	0.5	0	0	0	0.125	0.0714286	0	0.0833333	0
36054	1798865	genus	Kondoa					0.0714286	0.0769231	0	0	0.333333	0	0	0.375	0.142857	0	0.25	0.5
36064	355688	order	Cantharellales		Ceratobasidiales;Tulasnellales			0.357143	0.307692	0	0.5	0	0.25	1	0.25	0.285714	0	0.166667	0
36649	5094	species	Talaromyces aculeatus		Penicillium aculeatum;Penicillium aculeatus		Penicillium aculeatum Raper & Fennell 1948;Talaromyces aculeatus (Raper & Fennell) Samson, Yilmaz, Frisvad & Seifert 2011	0	0.0769231	0	0	0	0	0	0	0	0	0	0
36913	1535325	genus	Lodderomyces					0	0.0769231	0	0	0	0	0	0	0	0	0	0
36919	29820	genus	Plectania					0	0	0	0	0.333333	0	0	0	0	0	0	0
36922	767018	genus	Diaporthe					0.571429	0.153846	0	0.5	0.333333	0.25	1	0.375	0.357143	0	0.416667	0
37234	1676655	genus	Spiromastix		Spiromastigoides		Spiromastigoides Doweld, 2013;Spiromastix Kuehn & G.F. Orr, 1962	0	0	0	0	0	0	0	0	0.142857	0	0	0
37463	683158	genus	Phoma					0.714286	0.615385	0.5	1	0.333333	0.5	0	0.5	0.714286	1	0.583333	1
37467	227329	genus	Pisolithus					0	0.0769231	0	0	0	0	0	0	0.0714286	0	0	0
37839	5014	no rank	unclassified Dothideales					0.714286	0.769231	0.25	0.5	0.333333	0.25	0	0.375	0.714286	1	0.416667	1
37840	1812776	genus	Pestalotiopsis					0.214286	0	0	0.5	0	0	1	0	0.142857	0	0.0833333	0
37884	100025	genus	Rhytidhysteron					0.214286	0.0769231	0	0	0.333333	0	0	0.125	0.142857	0	0	0.5
37937	744530	genus	Ramichloridium					0.0714286	0	0	0	0	0	0	0	0.0714286	0	0	0.5
37989	222545	order	Xylariales		Sphaeriales			1	0.923077	0.75	1	1	0.5	1	0.875	1	1	0.916667	1
37990	37989	family	Xylariaceae		Sphaeriaceae			0.357143	0.230769	0.25	0.5	0.333333	0	0	0.25	0.214286	0	0.166667	0
37991	37990	genus	Xylaria					0.142857	0.0769231	0.25	0.5	0	0	0	0.125	0	0	0	0
38074	388283	order	Ostropales					0.357143	0.461538	0.25	0	0.333333	0.25	0	0.75	0.357143	0	0.333333	0.5
38240	5204	no rank	unclassified Basidiomycota		unclassified Teliomycetes;unidentified Basidiomycota			0.214286	0.230769	0.25	0.5	0	0	0	0.25	0.285714	0	0.166667	0
38452	110844	genus	Rutstroemia					0.214286	0.0769231	0	0.5	0	0	0	0.125	0	1	0.166667	0
38464	38462	species	Lambertella subrenispora					0.214286	0.0769231	0	0	0	0	0	0.125	0.142857	0	0.25	0
38944	862241	genus	Flammulina					0	0	0	0	0	0	0	0.125	0	0	0	0
39180	5304	genus	Corticium					0	0	0	0	0	0	0	0.125	0	0	0	0
39291	5309	species	Athelia rolfsii		Corticium rolfsii	Sclerotium rolfsii	Athelia rolfsii (Curzi) C.C.Tu et Kimbr.;Corticium rolfsii Curzi	0	0	0	0	0	0	0	0.125	0	0	0	0
39679	39678	genus	Arthonia					0.0714286	0	0.25	0	0	0	0	0	0.0714286	0	0.166667	0
39702	93133	genus	Septoria					0.5	0.153846	0.25	0.5	0.333333	0.25	0	0.5	0.285714	0	0.333333	0.5
39934	39933	genus	Lecanora					0	0	0	0	0	0	0	0	0.0714286	0	0	0
39937	1302181	family	Caliciaceae					0.142857	0.0769231	0	0	0.333333	0	0	0.25	0.142857	0	0.0833333	0.5
40219	2126968	genus	Symbiotaphrina		Tromeropsis			0	0.0769231	0	0	0	0	0	0	0	0	0.0833333	0.5
40415	1769247	genus	Antrodia					0	0	0	0	0	0	0	0	0.0714286	1	0.0833333	0
40427	1931355	genus	Ceriporia					0	0	0	0	0	0	0	0.125	0	0	0	0
40463	103393	genus	Peniophora					0	0	0	0	0	0	0	0	0.142857	0	0	0
40593	5186	genus	Peziza					0	0.0769231	0	0	0	0	0	0	0.0714286	0	0	0
40609	5133	species	Nectria zonata					0	0	0	0	0	0	0	0	0.142857	0	0	0
40654	40653	species	Wallrothiella subiculosa					0.0714286	0	0	0	0	0	0	0	0	0	0	0
40657	1033978	genus	Plectosphaerella			Plectosporium		0.428571	0.153846	0.25	0.5	0	0	0	0.375	0.285714	0	0.25	0
40995	45676	family	Elsinoaceae					0.5	0.615385	0	0	0.333333	0	0	0.5	0.571429	1	0.583333	0.5
40996	40995	genus	Elsinoe					0.5	0.615385	0	0	0.333333	0	0	0.5	0.571429	1	0.583333	0.5
41247	2024004	genus	Mycena					0	0	0	0.5	0	0	1	0	0	0	0.0833333	0
41254	93133	genus	Mycosphaerella					0.214286	0.538462	0	0	0	0	1	0.125	0.428571	1	0.0833333	0.5
42302	5139	family	Lasiosphaeriaceae					0.5	0.230769	0.25	1	0.333333	0	0	0.375	0.285714	0	0.333333	0
42303	42302	genus	Cercophora					0	0	0	0	0	0	0	0	0.0714286	0	0	0
42364	37989	family	Diatrypaceae					0	0	0	0	0	0	1	0.125	0	0	0	0
42658	1851551	genus	Udeniomyces					0.357143	0.230769	0.25	0.5	0	0	0	0	0.428571	0	0.25	0
42660	42658	species	Udeniomyces puniceus		Bullera punicea;Candida punicea		Candida punicea Komag. & Nakase, 1965;Udeniomyces puniceus (Komag. & Nakase) Nakase & Takem., 1992	0.285714	0	0.25	0	0	0	0	0	0.214286	0	0.25	0
43083	5186	genus	Plicaria					0.142857	0.153846	0	1	0.333333	0	0	0.125	0	1	0.25	0
43216	1572707	family	Tubeufiaceae					0.285714	0.230769	0.5	0.5	0	0.5	1	0.5	0.428571	0	0.0833333	0
43217	43216	genus	Tubeufia					0	0.0769231	0.25	0	0	0	0	0.125	0	0	0	0
43219	34395	family	Herpotrichiellaceae					0.928571	0.692308	0.25	1	0.333333	0.5	0	1	0.928571	1	0.75	1
43220	43219	genus	Capronia					0.0714286	0.0769231	0	0	0	0	0	0	0	0	0	0.5
44624	33159	genus	Helvella					0.142857	0	0	0	0	0	0	0	0.0714286	0	0	0
44653	77634	genus	Tetracystis				Tetracystis R.M.Brown & Bold, 1964	0.0714286	0	0	0	0	0	0	0	0.0714286	0	0	0
45131	451869	family	Botryosphaeriaceae					0.642857	0.153846	0.25	1	0	0.5	0	0.375	0.785714	1	0.333333	0
45132	45131	genus	Botryosphaeria					0.142857	0	0	0.5	0	0.5	0	0.125	0.214286	0	0.0833333	0
45147	92860	family	Lophiostomataceae					1	0.846154	0.5	1	0.666667	0.25	1	0.875	0.714286	0	0.666667	1
45148	45147	genus	Lophiostoma					0.857143	0.615385	0.5	1	0.666667	0.25	1	0.875	0.714286	0	0.5	1
45153	55176	genus	Westerdykella		Eremodothis			0.0714286	0	0	0	0	0	0	0	0.0714286	0	0	0
45307	92860	family	Melanommataceae					0.142857	0.153846	0	0	0	0	0	0.125	0	0	0.0833333	0
45426	4890	no rank	unclassified Ascomycota		unidentified Ascomycota			0.285714	0.0769231	0.25	0.5	0	0.25	0	0.375	0.142857	0	0.25	0.5
45676	451867	order	Myriangiales					0.642857	0.615385	0.25	0	0.333333	0.5	0	0.5	0.714286	1	0.666667	0.5
46452	46451	genus	Thelebolus					0.285714	0.384615	0.25	0.5	0	0	1	0	0.0714286	0	0.25	0
47021	189479	family	Orbiliaceae					0.642857	0.384615	0.5	1	0.333333	0.25	1	0.75	0.357143	1	0.5	1
47022	47021	genus	Orbilia					0.571429	0.384615	0.5	0.5	0.333333	0.5	1	0.5	0.214286	1	0.5	1
47167	47166	family	Rhytismataceae					0.571429	0.230769	0.25	0.5	0	0.25	0	0.5	0.5	0	0.25	0
47197	47196	species	Iodophanus carneus					0.5	0	0	0.5	0	0	0	0.25	0.285714	0	0.0833333	0
47274	47021	genus	Dactylaria					0.142857	0	0	0.5	0	0.25	0	0.5	0.0714286	0	0	0
47743	5178	family	Hyaloscyphaceae					0.357143	0.153846	0	0	0	0	0	0.375	0.214286	0	0.0833333	0
47744	47743	genus	Cistella					0.285714	0.0769231	0	0	0	0	0	0.125	0.142857	0	0	0
47745	47744	species	Cistella grevillei					0.214286	0	0	0	0	0	0	0.125	0.0714286	0	0	0
47751	47743	genus	Arachnopeziza					0	0.0769231	0	0	0	0	0	0	0.0714286	0	0	0
47817	47743	genus	Lachnum					0	0	0	0	0	0	0	0	0	0	0.0833333	0
50045	42803	species	Spongiochloris spongiosa				Spongiochloris spongiosa (Vischer) R.C.Starr, 1955	0.214286	0	0	0.5	0	0	0	0	0.142857	0	0	0
50375	1111112	genus	Fusicladium					0.142857	0.0769231	0	0	0	0.5	1	0.125	0.142857	0	0	0.5
50934	1302181	family	Physciaceae					0.0714286	0.0769231	0	0	0	0	0	0.125	0.0714286	0	0	0.5
50966	5351	genus	Clitocybe					0.0714286	0	0	0	0	0	1	0	0	0	0.0833333	0
54695	5178	no rank	unclassified Helotiales		unclassified Leotiales;unidentified Leotiales			0.142857	0	0	0	0	0	0	0.25	0.0714286	0	0	0
54788	290882	genus	Stagonospora		Saccharicola			0.0714286	0	0.25	0	0	0	0	0	0.0714286	1	0	0.5
54958	37989	family	Amphisphaeriaceae					0.428571	0.307692	0	0	0	0	0	0.375	0.285714	0	0.166667	0
55067	5020	genus	Phaeosphaeria					0.642857	0.461538	0	0.5	0.333333	0.25	0	0.375	0.571429	1	0.166667	1
55170	683158	genus	Didymella					0.357143	0.153846	0	0	0	0	0	0.125	0.214286	0	0.0833333	0
55176	92860	family	Sporormiaceae					0.928571	0.615385	0.75	1	0.333333	0.25	0	0.75	0.5	0	0.583333	1
55178	265084	species	Preussia australis		Sporormiella australis		Sporormiella australis (Speg.) S.I.Ahmed & Cain	0.0714286	0	0	0	0	0	0	0	0	0	0	0
55193	742845	genus	Malassezia					0.285714	0.384615	0.25	0.5	0.333333	0.25	1	0	0.357143	0	0.333333	1
56178	41954	genus	Limacella					0	0.0769231	0	0	0	0	0	0	0	0	0	0
56190	56189	genus	Podaxis					0.0714286	0	0	0	0	0	0	0	0	0	0	0
56757	38074	family	Stictidaceae					0.214286	0.307692	0.25	0	0.333333	0.25	0	0.625	0.357143	0	0.0833333	0
57474	4970	species	Bullera unica					0.142857	0.0769231	0	0	0	0	0	0.125	0.0714286	0	0	0
57687	57692	genus	Fibulobasidium					0	0	0.25	0	0	0	0	0.125	0.0714286	0	0	0
57692	5234	family	Sirobasidiaceae					0.357143	0.0769231	0.25	0.5	0.333333	0	0	0.125	0.357143	0	0.25	0.5
58127	290882	genus	Helminthosporium					0.0714286	0.0769231	0	0	0	0	0	0.25	0.142857	0	0	0
60849	85904	genus	Vorticella					0	0	0	0	0	0	0	0	0	0	0	0
61459	1955842	species	Coniosporium apollinis					0	0.0769231	0	0	0	0	0	0	0	0	0.166667	0
62074	156300	genus	Sarcinomyces					0.285714	0.153846	0	0	0	0	0	0	0.357143	0	0	0
62138	62133	genus	Scorias					0.285714	0.153846	0	0.5	0.333333	0.5	0	0.375	0.0714286	0	0	0
62701	34371	genus	Podosphaera					0.142857	0.153846	0	0.5	0	0.25	0	0.25	0.0714286	0	0.416667	0
63255	62911	genus	Entorrhiza					0.214286	0.0769231	0	0.5	0	0	0	0	0.0714286	0	0	0
63298	5268	genus	Pseudozyma					0	0.0769231	0.25	0	0	0	0	0	0.0714286	0	0	0
64357	47167	genus	Lophodermium					0	0	0.25	0	0	0	0	0.125	0.142857	0	0	0
64482	64899	genus	Dothiora					0.428571	0.230769	0.25	0	0	0	1	0.5	0.428571	0	0.25	0
64517	64515	species	Rhizophlyctis rosea		Karlingia rosea			0.214286	0	0	0	0	0	0	0	0	0	0	0
64899	5014	family	Dothioraceae		anamorphic Dothioraceae			0.785714	0.692308	0.5	0	0	0.25	1	0.625	0.714286	0	0.666667	0.5
66005	147383	genus	Austrostipa				Austrostipa S.W.L.Jacobs & J.Everett	0	0	0.25	0	0	0	0	0	0.0714286	0	0	0
66029	147379	genus	Microlaena				Microlaena R.Br., 1810	0	0.0769231	0	0	0	0	0	0	0.0714286	0	0	0
66516	1484953	family	Phacidiaceae					0.428571	0.153846	0	0.5	0	0.25	0	0.25	0.5	0	0.25	0
66611	34395	family	Chaetothyriaceae					0.214286	0.0769231	0	0	0.333333	0	0	0	0.142857	0	0	0
66739	45131	genus	Lasiodiplodia					0.0714286	0.0769231	0	0	0	0	0	0	0.142857	0	0	0
67608	1682405	genus	Microdochium					0.428571	0.0769231	0.25	0.5	0	0	0	0.25	0.0714286	1	0.0833333	0
68764	68763	genus	Geastrum					0	0	0	0	0	0	0	0.125	0	0	0	0
68795	68793	species	Botryobasidium subcoronatum					0	0	0	0	0	0	0	0.125	0	0	0	0
68802	5304	genus	Hyphodontia					0.0714286	0	0	1	0	0	0	0.125	0.142857	0	0.166667	0
68809	68808	genus	Typhula					0	0	0.25	0	0	0	0	0	0	0	0	0
71598	38074	family	Graphidaceae		Fissurinaceae;Thelotremataceae		Graphidaceae Dumort., 1822	0.214286	0.153846	0	0	0	0.5	0	0.625	0	0	0.25	0
71779	57692	genus	Sirobasidium					0.357143	0.0769231	0	0.5	0.333333	0	0	0.125	0.214286	0	0.25	0.5
71780	71779	species	Sirobasidium magnum				Sirobasidium magnum Boedijn, 1934	0	0	0	0	0	0	0	0.125	0	0	0	0
71913	5351	genus	Resupinatus					0	0.0769231	0	0	0	0	0	0	0.142857	0	0	0
71937	71934	genus	Entoloma					0.0714286	0	0	0	0	0	0	0	0	0	0.0833333	0
72117	5338	family	Omphalotaceae					0	0	0	0	0	0	0	0.125	0	0	0	0
72305	40111	genus	Dirina					0	0	0	0	0	0	0	0	0	0	0	0.5
72306	72305	species	Dirina catalinariae					0	0	0	0	0	0	0	0	0	0	0	0.5
73565	73564	species	Aporospora terricola					0	0	0	0	0	0	0	0	0.0714286	0	0	0
74721	1667166	genus	Stachybotrys					0	0.0769231	0	0	0	0	0	0	0	0	0	0
75749	75748	species	Glomerobolus gelineus					0.142857	0.0769231	0.25	0	0.333333	0	0	0.125	0.214286	0	0	0
76657	5178	family	Dermateaceae					0.0714286	0	0	0	0	0	0	0.125	0.142857	0	0	0
76773	55193	species	Malassezia globosa					0.0714286	0	0	0	0	0	0	0	0	0	0	0
78060	157822	family	Parmeliaceae		Alectoriaceae;Anziaceae			0.142857	0.307692	0.25	0	0	0	0	0.25	0.214286	1	0.25	1
78141	37240	genus	Oidiodendron					0.0714286	0	0	0	0	0	0	0.125	0	0	0	0
79807	292576	family	Coniochaetaceae					0.785714	0.307692	0.25	1	0.333333	0	0	0.875	0.785714	0	0.666667	0.5
79808	79807	genus	Coniochaeta		Lecythophora			0.785714	0.230769	0.25	1	0.333333	0	0	0.875	0.714286	0	0.666667	0.5
80628	452334	family	Atheliaceae					0	0	0	0	0	0	0	0.125	0	0	0	0
81064	5303	family	Meruliaceae		Climacodontaceae;Phlebiaceae			0.0714286	0.230769	0	0	0	0	0	0.125	0.0714286	0	0	0
81065	1931355	genus	Gloeoporus					0.0714286	0.0769231	0	0	0	0	0	0.125	0	0	0	0
82105	43219	genus	Cladophialophora					0.285714	0.0769231	0.25	0.5	0	0.25	0	0.625	0.357143	0	0.25	0.5
82268	82267	species	Hyaloraphidium curvatum					0	0	0	0	0	0	0	0	0	0	0	0
84755	1804794	species	Kalmanozyma fusiformata		Candida fusiformata;Pseudozyma fusiformata		Kalmanozyma fusiformata (Buhagiar) Q.M. Wang, F.Y. Bai, Begerow & Boekhout, 2016	0	0	0	0	0	0	0	0	0.0714286	0	0	0
86830	5277	species	Leucosporidium fragarium		Candida fragaria;Leucosporidiella fragaria;Rhodotorula fragaria;Rhodotorula fragariae;Torulopsis fragaria;Torulopsis fragariae;Vanrija fragaria;Vanrijia fragaria		Leucosporidiella fragaria (J.A. Barnett & Buhagiar) J.P. Samp., 2003;Leucosporidium fragarium (J.A. Barnett and Buhagiar) V. de Garcia, M. A. Coelho, T. Maia, L. H. Rosa, A. M. Vaz, C. A. Rosa, J. P. Sampaio, P. Gonalves, M. R. van Broock and D. Libkind, 2015;Torulopsis fragariae J.A. Barnett & Buhagiar, 1971	0	0.153846	0	0	0	0	0	0.125	0.0714286	0	0	0
88639	388283	order	Pertusariales					0	0	0	0	0	0	0	0.25	0	0	0	0
88646	1302176	family	Teloschistaceae					0.142857	0	0	0	0	0	0	0.125	0	0	0	0.5
88746	157821	family	Acarosporaceae					0.428571	0.461538	0.5	0.5	0.333333	0.25	1	0.625	0.428571	0	0.416667	0.5
88747	88746	genus	Acarospora					0.428571	0.384615	0.5	0.5	0.333333	0.25	1	0.625	0.428571	0	0.333333	0.5
89443	4751	no rank	unclassified Fungi					0.857143	0.923077	0.75	1	0.333333	0.25	1	0.75	1	1	0.833333	1
90676	5426	genus	Bovista					0	0	0	0	0	0	0	0	0.0714286	0	0	0
90886	155616	order	Filobasidiales					1	1	1	1	1	0.5	1	1	1	1	1	1
91806	1520784	genus	Trapelia					0.0714286	0	0	0	0	0	0	0	0	0	0.0833333	0
91984	106022	species	Sakaguchia lamellibrachiae		Rhodotorula lamellibrachiae		Sakaguchia lamellibrachiae (Nagah., Hamam., Nakase & Horikoshi) Q.M. Wang, F.Y. Bai, M. Groenew. & Boekhout, 2015	0.214286	0.230769	0	0.5	0	0.5	0	0.375	0.428571	0	0.0833333	0
92860	451868	order	Pleosporales					1	1	1	1	1	0.5	1	1	1	1	1	1
92862	92860	no rank	unclassified Pleosporales					0.857143	0.615385	1	1	1	0.5	1	0.5	0.857143	1	0.666667	0.5
92987	129384	genus	Phaeotheca					0.0714286	0.0769231	0	0	0	0	0	0	0	0	0	0.5
93133	134362	family	Mycosphaerellaceae					1	0.769231	0.5	1	0.333333	0.25	1	0.875	0.857143	1	0.666667	1
95331	34379	genus	Pseudeurotium					0.0714286	0.0769231	0	0	0	0	0	0	0	0	0	0
95729	28556	genus	Stemphylium					0.928571	1	1	1	1	0.5	1	0.75	1	1	1	1
97971	1898439	genus	Periconia					0.428571	0.0769231	0	0.5	0	0	0	0.375	0.214286	1	0	1
100025	191554	family	Hysteriaceae					0.214286	0.153846	0.25	0.5	0.333333	0	0	0.125	0.214286	0	0.333333	0.5
100032	715298	genus	Keissleriella					0.785714	0.461538	0.75	1	0.333333	0.25	1	0.625	0.571429	1	0.583333	0
100035	100034	species	Massariosphaeria phaeospora					0	0	0	0	0	0	1	0	0	0	0	0
101853	76657	genus	Pezicula					0.0714286	0	0	0	0	0	0	0	0.0714286	0	0	0
103376	452342	family	Stereaceae					0	0	0	0	0.333333	0	0	0.125	0	0	0	0
103886	261460	family	Chaetosphaeriaceae					0.857143	0.384615	0.5	1	0.666667	0.25	0	0.875	0.642857	1	0.416667	1
103887	5125	family	Bionectriaceae		anamorphic Bionectriaceae			0.214286	0	0.25	0.5	0	0	0	0.25	0.142857	0	0.166667	0
104247	452226	genus	Candelariella					0	0.0769231	0.25	0	0	0	0	0	0	0	0	0
104351	104350	genus	Crepidotus					0	0	0.25	0	0	0	0	0	0	0	0	0
104397	683158	genus	Epicoccum		Cerebella			0.714286	0.923077	0.75	0.5	0.666667	0.25	0	0.5	0.642857	0	0.833333	0
105767	5215	genus	Tremella					0.928571	0.769231	0.75	1	0.666667	0.25	0	0.75	1	1	0.833333	0.5
105996	1611264	genus	Occultifur				Occultifur Oberw., 1990	0.0714286	0	0	0	0	0	0	0	0	0	0	0
106001	1798813	species	Buckleyzyma armeniaca		Rhodotorula armeniaca		Buckleyzyma armeniaca (R.G. Shivas & Rodr. Mir.) Q.M. Wang, F.Y. Bai, M. Groenew. & Boekhout, 2015	0.142857	0.153846	0	0	0	0	0	0	0.285714	0	0	0
106008	256806	species	Curvibasidium cygneicollum		Candida fujisanensis;Torulopsis fujisanensis;Vanrija fujisanensis		Curvibasidium cygneicollum J.P. Samp., 2004	0.357143	0.384615	0.25	1	0	0	0	0.75	0.642857	0	0.5	0
106010	1801565	species	Sampaiozyma ingeniosa		Candida ingeniosa;Rhodotorula ingeniosa;Torulopsis ingeniosa;Vanrija ingeniosa;Vanrijia ingeniosa		Rhodotorula ingeniosa (Di Menna) Arx & Weijman, 1979;Sampaiozyma ingeniosa (Di Menna) Q.M. Wang, F.Y. Bai, M. Groenew. & Boekhout, 2015;Torulopsis ingeniosa Di Menna, 1958	0.928571	0.384615	0	1	0.333333	1	1	0.75	0.785714	0	0.916667	0
106019	1803523	species	Yunzhangia sonckii		Candida sonckii;Rhodotorula sonckii;Vanrija sonckii;Vanrijia sonckii		Candida sonckii Hopsu-Havu, Tunnela & Yarrow, 1978;Rhodotorula sonckii (Hopsu-Havu, Tunnela & Yarrow) Rodr. Mir. & Weijman, 1988;Yunzhangia sonckii (Hopsu-Havu, Tunnela & Yarrow) Q.M. Wang, F.Y. Bai, M. Groenew. & Boekhout, 2015	0.428571	0.153846	0	0	0	0.5	0	0.5	0.0714286	0	0.166667	0
106022	460509	genus	Sakaguchia					0.357143	0.230769	0.25	0.5	0	0.5	0	0.375	0.571429	0	0.0833333	0
106023	106022	species	Sakaguchia dacryoidea		Rhodosporidium dacryoideum;Rhodosporidium dacryoidum		Sakaguchia dacryoidea (Fell, I.L. Hunter & Tallman) Y. Yamada, K. Maeda & Mikata, 1994	0.142857	0	0.25	0	0	0.25	0	0	0.0714286	0	0	0
106263	37989	family	Apiosporaceae					0.214286	0	0	0	0	0	0	0	0	0	0	0
106814	4496	species	Avena macrostachya				Avena macrostachya Balansa ex Coss. & Durieu	0	0.153846	0	0	0	0	0	0	0	0	0	0
109764	109763	species	Harpochytrium sp. JEL94					0.142857	0	0	0	0	0	0	0	0	0	0	0
109893	1134080	genus	Powellomyces					0	0	0	0	0	0	0	0	0.142857	0	0	0
110564	103887	genus	Clonostachys					0	0	0.25	0.5	0	0	0	0	0	0	0	0
110586	29865	species	Nectriopsis violacea					0.142857	0	0	0.5	0	0	0	0.25	0.0714286	0	0.166667	0
110618	5125	family	Nectriaceae					1	0.461538	0.5	1	1	0.5	1	0.75	1	1	0.833333	1
110844	5178	family	Rutstroemiaceae					0.571429	0.230769	0	0.5	0.333333	0.25	0	0.25	0.142857	1	0.333333	0.5
111621	78060	genus	Xanthoparmelia		Chondropsis;Neofuscelia;Paraparmelia			0	0	0	0	0	0	0	0	0.0714286	0	0.166667	0
112072	112071	species	Naohidea sebacea		Dacrymyces sebaceus		Dacrymyces sebaceus Berk. & Broome, 1871;Naohidea sebacea (Berk. & Broome) Oberw., 1990	0	0	0	0	0.333333	0	0	0.125	0	0	0	0
112133	5181	genus	Crocicreas		Cyathicula			0	0	0.25	0	0	0	0	0	0.0714286	0	0.166667	0
112488	744530	genus	Dissoconium					0	0.0769231	0.25	0.5	0	0	0	0	0.142857	0	0	0
112497	93133	genus	Ramularia					0.214286	0.307692	0	0	0	0	1	0.375	0	1	0	0
114230	152648	genus	Nigrospora					0.142857	0.307692	0	0	0	0	0	0.125	0	0	0.166667	0
115234	110618	genus	Cosmospora					0	0	0	0	0	0	0	0	0.0714286	0	0	0.5
116791	111584	species	Buellia disciformis					0	0	0	0	0	0	0	0	0.0714286	0	0	0
116799	50934	genus	Phaeophyscia				Phaeophyscia Moberg, 1977	0	0.0769231	0	0	0	0	0	0	0.0714286	0	0	0
117058	71934	genus	Rhodocybe					0	0	0	0	0	0	0	0.125	0	0	0	0
117544	5117	genus	Cytospora					0.285714	0.615385	0.25	0.5	0.333333	0	0	0.125	0.642857	1	0.25	0
117816	34479	genus	Kochiomyces					0	0.0769231	0	0	0	0	0	0	0	0	0	0
117818	4815	species	Spizellomyces dolichospermus					0.0714286	0	0	0	0	0	0	0	0	0	0.0833333	0
118273	1406929	genus	Lecophagus					0	0	0	0	0	0	0	0	0	0	0.0833333	0
121621	1424649	genus	Phyllosticta					0.0714286	0.0769231	0	0	0	0	0	0.125	0.0714286	0	0.0833333	0
124095	39941	species	Mycocalicium victoriae					0	0	0.25	0	0	0	0	0	0	0	0	0
125369	221678	genus	Paraphaeosphaeria					0	0	0	0	0	0.25	0	0.125	0	0	0.0833333	0
131324	93133	genus	Pseudocercospora					0	0	0	0	0	0	0	0.125	0	0	0.0833333	0
131338	37990	genus	Anthostomella					0.142857	0	0	0	0.333333	0	0	0	0	0	0.0833333	0
132098	33198	species	Drechslera campanulata					0.5	0.307692	0	0.5	0.666667	0.5	1	0.5	0.357143	0	0.166667	0
134362	451867	order	Capnodiales					1	1	1	1	1	0.5	1	1	1	1	1	1
134502	1769459	genus	Chaetomella					0.0714286	0	0	0	0	0	0	0	0	0	0	0
136167	46635	species	Hormonema sp. F-054,258					0.642857	0.538462	0.5	0	0	0.25	0	0.25	0.571429	0	0.5	0
136422	5263	species	Uromyces striatus					0	0	0	0	0	0	0	0.125	0	0	0	0
138063	1812776	genus	Seiridium					0.0714286	0.0769231	0	0	0	0	0	0	0	0	0.0833333	0
139131	5304	genus	Sistotrema					0	0	0	0	0	0	0	0	0.0714286	0	0.0833333	0
139133	1229510	genus	Sistotremastrum					0	0	0	0	0	0	0	0.125	0	0	0.0833333	0
139134	139133	species	Sistotremastrum niveocremeum					0	0	0	0	0	0	0	0.125	0	0	0	0
139159	1931355	genus	Byssomerulius					0	0.0769231	0	0	0	0	0	0	0	0	0	0
139171	139141	species	Tubulicrinis sp. GEL5046					0	0.0769231	0	0	0	0	0	0	0.142857	0	0	0
139231	33198	species	Drechslera nobleae					0.0714286	0	0	0	0	0	0	0	0.428571	0	0	0
143937	76657	genus	Neofabraea					0	0	0	0	0	0	0	0.125	0	0	0	0
146292	146291	family	Verrucariaceae		Mastodiaceae		Mastodiaceae Zahlbr. 1907;Verrucaria Schrad., 1794	0.142857	0.0769231	0	0	0	0	0	0	0.142857	0	0.25	0
147498	92860	no rank	Pleosporales incertae sedis					0.857143	0.538462	0.25	1	0.666667	0.5	1	0.75	0.857143	0	0.666667	0.5
147538	716545	subphylum	Pezizomycotina		Euascomycota			1	1	1	1	1	0.5	1	1	1	1	1	1
147539	715962	class	Arthoniomycetes					0.785714	0.615385	0.5	1	0.333333	0.25	0	0.75	0.714286	1	0.833333	1
147541	715962	class	Dothideomycetes					1	1	1	1	1	0.5	1	1	1	1	1	1
147545	716546	class	Eurotiomycetes					0.928571	0.692308	0.5	1	0.333333	0.5	0	1	1	1	1	1
147547	716546	class	Lecanoromycetes					0.714286	0.846154	1	0.5	1	0.5	1	0.75	0.714286	1	0.75	1
147548	715989	class	Leotiomycetes					0.857143	0.846154	1	1	0.666667	0.5	1	1	0.857143	1	0.75	1
147550	715989	class	Sordariomycetes					1	1	1	1	1	0.5	1	1	1	1	1	1
150498	147550	no rank	unclassified Sordariomycetes					0.714286	0.0769231	0.25	0	0.333333	0	0	0.5	0.214286	0	0.0833333	0.5
152622	37990	genus	Muscodor					0	0.0769231	0	0	0	0	0	0	0	0	0	0
154566	1344078	genus	Marchandiomyces					0	0.153846	0	0	0	0	0	0.375	0	0	0	0
155415	110158	genus	Monosporascus					0.0714286	0	0.25	0	0	0	0	0	0	0	0	0
155416	155415	species	Monosporascus cannonballus					0	0	0.25	0	0	0	0	0	0	0	0	0
155616	5302	class	Tremellomycetes		Heterobasidiomycetes			1	1	1	1	1	0.75	1	1	1	1	1	1
155619	5302	class	Agaricomycetes					0.714286	0.769231	0.75	1	0.666667	0.25	1	0.75	0.785714	1	0.833333	1
156596	1229510	genus	Trechispora					0.0714286	0	0	0	0	0	0	0	0.0714286	0	0	0
157253	157252	species	Muribasidiospora indica					0	0	0	0	0	0	0	0	0.0714286	0	0	0
158045	1618111	genus	Phaeomoniella					0.428571	0.384615	0.25	0.5	0	0	0	0.25	0.5	1	0.166667	0.5
159075	162454	genus	Acremonium					0.214286	0	0	0.5	0.333333	0	0	0.125	0.142857	0	0.0833333	0
159638	147548	no rank	unclassified Leotiomycetes					0.357143	0.153846	0	0	0	0.25	0	0.25	0.142857	0	0.166667	0
159639	5178	no rank	Helotiales incertae sedis					0.142857	0	0	0	0	0	0	0.375	0	0	0	0
159987	147541	no rank	Dothideomycetes incertae sedis					0.928571	0.769231	0.75	1	0.333333	0.5	1	0.75	0.857143	1	0.833333	1
160893	160892	species	Ceratosebacina calospora					0	0	0.25	0	0	0	0	0	0	0	0	0
162405	1910953	genus	Bartalinia					0.0714286	0	0	0	0	0	0	0	0.0714286	0	0.0833333	0
162418	54958	genus	Seimatosporium					0.428571	0.307692	0	0	0	0	0	0.375	0.285714	0	0.0833333	0
162454	5125	no rank	Hypocreales incertae sedis					0.571429	0.307692	1	1	0.333333	0	0	0.375	0.357143	0	0.25	0
162475	452283	order	Microstromatales					0.142857	0.153846	0	0	0	0	0	0.25	0.214286	0	0	0
162477	162475	no rank	Microstromatales incertae sedis					0.142857	0.0769231	0	0	0	0	0	0.125	0	0	0	0
162481	29000	class	Microbotryomycetes		Microbotryomycetidae			0.928571	0.846154	1	1	1	0.75	1	1	1	1	1	1
163257	45147	genus	Vaginatispora					0.142857	0.153846	0	0.5	0.333333	0	0	0.125	0.0714286	0	0	0
164535	129384	genus	Tetracladium					0.857143	0.538462	1	1	0.666667	0.5	0	1	0.571429	0	0.833333	0
165440	1884640	genus	Dioszegia					1	0.846154	0.5	1	1	0.25	0	0.875	0.928571	1	0.916667	1
165790	432006	family	Erythrobasidiaceae				Erythrobasidiaceae Denchev 2009	0.428571	0.384615	0	0	0.333333	0.25	0	0.625	0.357143	1	0.5	1
171627	5506	no rank	Fusarium fujikuroi species complex		Gibberella fujikuroi complex			0	0	0	0	0	0	0	0	0	0	0	0
172190	1535530	genus	Coniella		Pilidiella			0.285714	0.230769	0	0	0.333333	0.5	0	0.125	0.214286	0	0.166667	0
172618	78060	genus	Hypotrachyna					0.0714286	0.0769231	0	0	0	0	0	0	0.0714286	1	0.0833333	0
173137	40593	species	Peziza michelii					0	0.0769231	0	0	0	0	0	0	0.0714286	0	0	0
173150	5186	genus	Ruhlandiella					0	0.0769231	0	0	0	0.25	0	0.125	0.142857	0	0	0
175500	66029	species	Microlaena avenacea		Ehrharta diplax		Ehrharta diplax F.Muell.;Microlaena avenacea (Raoul) Hook.f.	0	0.0769231	0	0	0	0	0	0	0.0714286	0	0	0
175855	40424	genus	Fuscoporia					0	0	0.25	0	0	0	0	0	0	0	0	0
176137	5186	no rank	unclassified Pezizaceae		unclassified Terfeziaceae			0.0714286	0	0	0	0	0	0	0	0	0	0	0
177194	221903	genus	Hyphozyma					0	0	0	0	0	0	0	0	0	0	0.0833333	0
178737	37990	genus	Arthroxylaria					0	0.0769231	0	0	0	0	0	0	0	0	0	0
181926	5320	species	Pleurotus australis					0	0	0	0	0	0	1	0	0	0	0	0
184430	184208	genus	Coprinellus					0.142857	0	0	0	0	0	0	0.125	0.285714	0	0.166667	0
184431	184208	genus	Coprinopsis					0	0.0769231	0	0	0.333333	0	0	0	0	0	0.0833333	0
187248	1171044	genus	Harknessia					0.428571	0.0769231	0.25	0	0	0.25	0	0.5	0.428571	1	0.5	0
188545	188544	species	Demodex canis				Demodex canis Leydig, 1859	0.0714286	0.0769231	0	0	0	0	0	0	0	0	0.0833333	0
189359	37989	no rank	Xylariales incertae sedis					0.928571	0.923077	0.75	1	0.666667	0.25	1	0.75	0.857143	1	0.916667	0.5
189450	1581159	genus	Papiliotrema					0.928571	0.461538	0.25	1	0.666667	0.5	0	0.875	0.642857	1	0.833333	0.5
190626	5296	species	Puccinia malvacearum					0	0	0	0	0	0	0	0	0	0	0.0833333	0
195053	103376	genus	Megalocystidium					0	0	0	0	0.333333	0	0	0	0	0	0	0
195797	195796	species	Ramalea cochleata					0	0	0	0	0	0	0	0	0.0714286	0	0	0
203525	34418	genus	Cystobasidium					0.5	0	0.5	0.5	0.333333	0	0	0.5	0.5	0	0.416667	0
209472	209470	species	uncultured Pleosporales		uncultured ectomycorrhiza (Pleosporales)			0	0	0	0	0	0	0	0	0.0714286	0	0	0
209473	147541	no rank	unclassified Dothideomycetes					0.571429	0.307692	0.25	0	0	0.25	0	0.75	0.571429	0	0.333333	1
218105	399129	no rank	Cryphonectria-Endothia species complex					0.0714286	0	0	0	0	0	0	0	0	0	0	0
218126	426519	genus	Quambalaria					0	0.0769231	0	0	0	0	0	0.125	0.214286	0	0	0
220344	5206	species	Cryptococcus sp. Pro94-Y57					0.142857	0	0	0	0	0	0	0.25	0.214286	1	0.166667	0.5
220671	5021	no rank	Leptosphaeria maculans species complex					0.214286	0.0769231	0.25	0	0	0.25	0	0.375	0.285714	0	0.25	0
220672	220671	species	Leptosphaeria biglobosa					0	0	0.25	0	0	0.5	0	0.125	0.0714286	0	0.0833333	0
221670	715340	family	Cucurbitariaceae					0.357143	0.0769231	0.25	0	0	0	0	0.25	0.5	0	0.333333	0.5
221678	1255046	family	Didymosphaeriaceae		Montagnulaceae			1	0.846154	0.75	1	0.666667	0.5	1	1	1	1	0.916667	1
221900	47166	family	Cudoniaceae					0	0	0	0	0	0	0	0	0	0	0.0833333	0
221903	147548	no rank	Leotiomycetes incertae sedis					0.214286	0.0769231	0	0	0	0	0	0.25	0.0714286	0	0.0833333	0
222543	147550	subclass	Hypocreomycetidae					1	1	1	1	1	0.5	1	1	1	1	0.916667	1
222544	147550	subclass	Sordariomycetidae					1	0.846154	0.75	1	1	0.5	1	1	1	1	1	1
223428	1520784	genus	Xylographa					0.0714286	0	0	0	0	0	0	0	0	0	0	0
223899	5181	genus	Tricladium					0.0714286	0	0	0.5	0	0	0	0	0.0714286	0	0	0
224419	147498	genus	Shiraia					0.0714286	0	0	0.5	0	0	0	0	0.0714286	0	0	0
226117	5531	species	Myrothecium gramineum		Xepiculopsis graminea			0.0714286	0	0.25	0	0	0	0	0	0.0714286	0	0.0833333	0
226122	5531	species	Myrothecium lachastrae					0	0	0	0.5	0	0	0	0	0.0714286	0	0.0833333	0
226991	1341112	genus	Cyphellophora					0.142857	0.0769231	0	0	0.333333	0	0	0.25	0.142857	1	0.166667	0
227067	221678	genus	Spegazzinia					0.357143	0.307692	0	0.5	0.333333	0	0	0	0.214286	1	0.0833333	0
228211	5020	genus	Phaeosphaeriopsis					0.0714286	0.0769231	0	0	0	0	0	0.125	0.0714286	0	0.0833333	0
228943	228942	species	Limonomyces roseipellis					0	0.153846	0	0.5	0.333333	0	0	0	0.0714286	1	0.0833333	0
228944	228942	species	Limonomyces culmigenus					0.285714	0.153846	0.25	0	0	0	1	0.25	0.0714286	0	0.25	0
231212	162481	order	Leucosporidiales					0.928571	0.230769	0.5	0.5	0.666667	0.75	0	0.625	0.714286	0	0.25	0
231213	162481	order	Sporidiobolales		Sporidiaceae			0.785714	0.615385	1	1	0	0.75	1	0.875	1	1	0.75	0.5
232773	56757	genus	Absconditella					0	0	0	0	0	0	0	0.125	0	0	0	0
237031	78060	genus	Canoparmelia					0.0714286	0	0	0	0	0	0	0	0	0	0	0
237584	668547	genus	Teratosphaeria					0.357143	0.692308	0.5	1	0.333333	0	0	0.5	0.5	0	0.333333	1
237593	470130	species	Catenulostroma elginense		Trimmatostroma elginense			0.0714286	0	0	0	0	0	0	0	0	0	0	0.5
243023	34397	genus	Pochonia					0	0	0.25	0	0	0	0	0	0	0	0	0
245174	148959	species	Wallemia ichthyophaga		Wallemia ichthiophaga		Wallemia ichthyophaga Johan-Olsen	0	0	0	0	0	0	0	0	0.0714286	0	0	0
248099	248098	species	Asterothyrium longisporum					0.214286	0.153846	0	0	0	0.5	0	0.5	0	0	0.25	0
252155	42302	genus	Schizothecium					0.428571	0.0769231	0.25	0.5	0.333333	0	0	0.125	0.285714	0	0.166667	0
252690	109893	species	Powellomyces sp. EA					0	0	0	0	0	0	0	0	0.0714286	0	0	0
255703	203525	species	Cystobasidium lysinophilum		Rhodotorula lysiniphila;Rhodotorula lysinophila		Cystobasidium lysinophilum (Nagahama, Hamamoto, Nakase & Horikoshi) Yurkov, Kachalkin, Daniel, Groenewald, Libkind, de Garcia, Zalar, Gouliamova, Boekhout & Begerow, 2014	0.142857	0	0	0	0	0	0	0	0.0714286	0	0	0
256806	162483	genus	Curvibasidium					0.357143	0.384615	0.25	1	0	0	0	0.75	0.642857	0	0.5	0
257870	1890244	species	Saitozyma paraflava		Cryptococcus paraflavus;Saitozyma paraflavus		Cryptococcus paraflavus Golubev & Sampaio	0.357143	0.0769231	0	0.5	0	0	0	0.25	0.0714286	0	0.333333	0
259858	746524	genus	Arctotheca				Arctotheca J.C.Wendl.	0.5	0	0	0	0	0	0	0	0	0	0	0
261096	451453	genus	Kappamyces					0.0714286	0.0769231	0	0	0	0	0	0	0.214286	0	0	0
265084	718227	genus	Preussia				Preussia Fuckel, 1867	0.714286	0.384615	0.75	1	0.333333	0	0	0.375	0.428571	0	0.333333	1
266071	1769459	genus	Pilidium					0.0714286	0.153846	0	0	0	0	0	0.125	0.142857	0	0.0833333	0
267215	1909749	species	Genolevuria amylolytica		Cryptococcus amylolyticus		Cryptococcus amylolyticus A. Fonseca, J. Inacio & Spenc.-Mart., 2005;Genolevuria amylolytica (A. Fonseca, J. Inacio & Spenc.-Mart.) X.Z. Liu, F.Y. Bai, M. Groenew. & Boekhout, 2016	0.142857	0	0	0.5	0.333333	0	0	0.25	0.142857	0	0.0833333	0
267217	1909749	species	Genolevuria armeniaca		Cryptococcus armeniacus		Genolevuria armeniaca (A. Fonseca & J. Inacio) X.Z. Liu, F.Y. Bai, M. Groenew. & Boekhout, 2015	0.428571	0.384615	0	0	0	0.25	1	0.5	0.285714	0	0.25	0
268179	1851470	genus	Cryptotrichosporon					0.214286	0.307692	0	0	0	0.25	0	0.125	0.214286	1	0.0833333	0
268180	268179	species	Cryptotrichosporon anacardii					0.142857	0.307692	0	0	0	0.25	0	0	0.142857	1	0.0833333	0
269607	237584	species	Teratosphaeria mexicana		Mycosphaerella mexicana			0.0714286	0.0769231	0	0	0	0	0	0.125	0.0714286	0	0.0833333	0
271836	271835	species	Acarosporina microspora		Schizoxylon microsporum		Schizoxylon microsporum R.W. Davidson & R.C.Lorenz	0	0.0769231	0	0	0	0	0	0	0	0	0	0
271885	154566	species	Marchandiomyces lignicola					0	0.0769231	0	0	0	0	0	0.25	0	0	0	0
276832	45131	genus	Dothiorella					0	0	0	0	0	0	0	0	0.0714286	0	0	0
278090	147544	genus	Teichospora		Floricola;Misturatosphaeria;Ramusculicola			0.214286	0.230769	0.25	0	0	0	0	0.375	0.428571	0	0.0833333	1
281250	134362	family	Schizothyriaceae					0.0714286	0	0	0	0	0	0	0	0	0	0	0
281846	118273	species	Lecophagus sp. ATCC 56071					0	0	0	0	0	0	0	0	0	0	0.0833333	0
284134	162454	genus	Sarocladium					0	0.153846	0	0	0	0	0	0	0	0	0.166667	0
285719	13786	no rank	unclassified Trebouxia		unclassified Trebouxia photobionts			0.285714	0.0769231	0	0.5	0	0.25	1	0.5	0.214286	0	0	0
285810	221670	genus	Pyrenochaeta					0.142857	0	0	0	0	0	0	0.125	0.285714	0	0.0833333	0
286399	88746	genus	Polysporina					0	0	0	0	0	0	0	0	0.0714286	0	0	0
286400	286399	species	Polysporina simplex					0	0	0	0	0	0	0	0	0.0714286	0	0	0
286401	88746	genus	Sarcogyne					0	0	0	0	0	0	0	0	0.0714286	0	0.0833333	0
286661	286660	species	Peltaster fructicola					0	0	0	0	0	0	0	0.125	0.0714286	0	0	0
290882	1255046	family	Massarinaceae					0.642857	0.153846	0.5	1	0	0.25	0	0.25	0.428571	1	0.333333	0.5
291227	152655	genus	Appendicheirospora					0	0	0	0	0	0	0	0	0	0	0.0833333	0
291228	291227	species	Appendicheirospora graminicola					0	0	0	0	0	0	0	0	0	0	0.0833333	0
291363	474943	genus	Lecanicillium					0.0714286	0	0	0	0	0	0	0	0	0	0	0
292188	292187	species	Carestiella socia					0.0714286	0.0769231	0	0	0	0	0	0.125	0.0714286	0	0.0833333	0
292576	222544	order	Coniochaetales					0.785714	0.307692	0.25	1	0.333333	0	0	0.875	0.785714	0	0.666667	0.5
296781	28983	genus	Torrendiella					0.0714286	0	0	0	0	0	0	0	0	0	0	0
296783	54683	species	Lanzia allantospora					0.0714286	0.0769231	0	0	0.333333	0	0	0	0.0714286	0	0	0
297313	355688	order	Sebacinales					0.0714286	0	0	0	0	0	0	0.125	0.0714286	0	0.0833333	0
306876	93133	genus	Readeriella					0.285714	0.230769	0	0	0	0	0	0	0.285714	0	0.166667	0
307341	89443	species	fungal sp. TRN254					0.0714286	0.153846	0	0	0	0	0	0	0.357143	0	0	0
307351	89443	species	fungal sp. TRN270					0	0	0	0	0	0	0	0.125	0	0	0	0
307369	89443	species	fungal sp. TRN436					0	0	0.25	0.5	0	0	0	0	0	0	0	0
307370	1664131	species	Ramimonilia apicalis				Ramimonilia apicalis Stielow & Quaedvlieg, 2015	0.142857	0.0769231	0	0	0.333333	0	0	0	0.0714286	0	0.0833333	0
307390	89443	species	fungal sp. TRN458					0.0714286	0.0769231	0	0	0	0	0	0	0	0	0	0
312146	1851509	species	Naganishia randhawae		Cryptococcus randhawai;Cryptococcus randhawii		Cryptococcus randhawai Z.U. Khan, Suh. Ahmad, F. Hagen, Fell, Kowshik, Chandy & Boekhout, 2010;Naganishia randhawae (Z.U. Khan, S.O. Suh. Ahmad, F. Hagen, Fell, Kowshik, Chandy & Boekhout) X.Z. Liu, F.Y. Bai, M. Groenew. & Boekhout,	0.285714	0	0	0.5	0	0	0	0.125	0.214286	0	0.333333	0
314120	1406929	genus	Vermispora					0	0	0	0	0	0	0	0	0	0	0	0.5
314149	43216	genus	Acanthostigma					0	0	0.25	0	0	0	0	0	0.142857	0	0	0
316340	34395	no rank	unclassified Chaetothyriales					0.5	0.230769	0.25	0.5	0	0	0	0.375	0.5	1	0.5	0.5
318751	45153	species	Westerdykella ornata					0	0	0	0	0	0	0	0	0.0714286	0	0	0
318860	715298	genus	Pleurophoma					0.428571	0.153846	0.25	0.5	0	0	0	0	0.142857	0	0	0
325665	45153	species	Westerdykella nigra					0.0714286	0	0	0	0	0	0	0	0	0	0	0
329018	81065	species	Gloeoporus dichrous					0.0714286	0	0	0	0	0	0	0	0	0	0	0
332221	332217	species	Neochlorosarcina negevensis		Chlorosarcinopsis negevensis		Chlorosarcinopsis negevensis I.Friedmann & R.Ocampo-Paus;Neochlorosarcina negevensis (I.Friedmann & R.Ocampo-Paus) S.Watanabe, 1983	0.214286	0	0	0.5	0	0	0	0	0.142857	0	0	0
333827	333826	species	Diptera environmental sample					0.0714286	0	0	0	0	0	0	0	0.0714286	0	0	0
336780	110846	genus	Pseudombrophila		Fimaria			0.0714286	0	0	0	0	0	0	0	0	0	0	0
337359	21555	species	Erodium carolinianum				Erodium carolinianum Aldasoro, C.Navarro, P.Vargas, L.Saez & Aedo	0	0	0	0	0	0	0	0	0.0714286	0	0	0
344958	43219	genus	Cladoriella					0	0.0769231	0.25	0	0	0	0	0	0.142857	0	0	0
344959	344958	species	Cladoriella eucalypti					0	0.0769231	0	0	0	0	0	0	0.142857	0	0	0
355688	155619	no rank	Agaricomycetes incertae sedis					0.714286	0.769231	0.75	1	0.666667	0.25	1	0.75	0.714286	1	0.666667	0
356988	5020	genus	Sclerostagonospora					0.0714286	0.0769231	0	0	0	0	0	0	0	0	0	0
361670	361669	species	Hemiflagellochloris kazakhstanica					0	0	0	0	0	0	0	0	0.0714286	0	0	0
364733	364710	species	Endocarpon pusillum					0.0714286	0.0769231	0	0	0	0	0	0	0.0714286	0	0.0833333	0
365329	1909748	species	Fonsecazyma mujuensis		Cryptococcus mujuensis		Cryptococcus mujuensis K.S. Shin & Y.H. Park 2006;Fonsecazyma mujuensis (K.S. Shin & Y.H. Park) X.Z. Liu, F.Y. Bai, M. Groenew. & Boekhout, 2015	0.214286	0.0769231	0	0	0	0	0	0	0.0714286	1	0.0833333	0
366620	89802	species	Hyphoderma orphanellum					0.0714286	0	0	0	0	0	0	0	0.0714286	0	0	0
366629	68802	species	Hyphodontia subalutacea		Hyphodontia sp. 1 LR-2015			0	0	0	0	0	0	0	0	0.0714286	0	0	0
371108	1450292	genus	Saccharata				Saccharata Denman & Crous	0.214286	0.0769231	0.25	0	0	0	0	0.25	0.428571	0	0.5	0.5
371113	45131	genus	Tiarosporella					0.142857	0	0.25	0	0	0	0	0	0.0714286	1	0.0833333	0
371114	371113	species	Tiarosporella graminis				Tiarosporella graminis (Piroz. & Shoemaker) Nag Raj	0.142857	0	0.25	0	0	0	0	0	0	1	0	0
385117	89443	species	fungal endophyte sp. SS-1353					0.0714286	0.0769231	0	0.5	0	0	0	0.125	0.214286	0	0	0
388283	1520881	subclass	Ostropomycetidae					0.428571	0.461538	0.25	0	0.333333	0.25	0	0.75	0.357143	0	0.333333	0.5
388435	1520881	subclass	Lecanoromycetidae					0.428571	0.384615	0.25	0	0.333333	0.25	0	0.625	0.428571	1	0.416667	1
391237	5304	genus	Peniophorella					0	0.0769231	0	0	0	0	0	0.125	0	0	0.166667	0
394858	1909749	species	Genolevuria bromeliarum		Cryptococcus bromeliarum		Cryptococcus bromeliarum M. F. Landell & P. Valente 2009;Genolevuria bromeliarum (Landell & P. Valente) X.Z. Liu, F.Y. Bai, M. Groenew. & Boekhout, 2016	0.0714286	0	0	0	0	0	0	0.125	0	0	0.0833333	0
396331	5303	family	Phanerochaetaceae		Bjerkanderaceae;Hapalopilaceae			0	0.153846	0.25	0	0	0	0	0.25	0.0714286	0	0	0
404203	89443	species	soil fungal sp. ANG34					0.0714286	0	0	0	0	0	0	0	0	0	0	0
405928	5186	genus	Hydnobolites					0.0714286	0	0	0	0	0	0	0.125	0	0	0	0
406764	47218	species	Saccobolus dilutellus					0.142857	0	0	0	0	0	0	0	0	0	0.0833333	0
407088	407949	species	Fusculina eucalypti				Fusculina eucalypti Crous & Summerell, 2009	0.214286	0.0769231	0	0	0	0.25	1	0.125	0.214286	0	0.0833333	0
407092	407091	species	Plectosphaera eucalypti		Phyllachora eucalypti		Phyllachora eucalypti (Speg.) Petr.;Plectosphaera eucalypti (Cooke & Massee) H.J.Swart	0.785714	0.846154	0.75	1	0.333333	0.5	1	0.625	0.857143	1	0.833333	0.5
407951	45131	genus	Neofusicoccum					0.0714286	0	0	0	0	0	0	0.125	0.142857	0	0	0
407953	189359	genus	Phlogicylindrium					0	0	0	0	0	0	0	0.125	0	0	0	0
408669	470111	species	Sympoventuria capensis					0	0	0	0	0	0	0	0	0.0714286	0	0	0
410823	89443	species	fungal endophyte		Fungal endophyte sp1			0.214286	0.0769231	0	0.5	0	0	0	0	0	0	0	0
411563	36064	genus	Minimedusa					0.214286	0	0	0.5	0	0	0	0	0	0	0.0833333	0
411704	154566	species	Marchandiomyces buckii					0	0	0	0	0	0	0	0.125	0	0	0	0
412498	139971	species	Menispora sp. EXP0529F					0	0.0769231	0	0	0	0	0	0	0	0	0	0
414539	5583	species	Exophiala crusticola					0.0714286	0	0	0	0	0	0	0.125	0	0	0	0
422685	221678	no rank	unclassified Didymosphaeriaceae					0.0714286	0	0.25	0	0	0	0	0	0.0714286	0	0	0.5
424532	5206	species	Cryptococcus sp. FYB-2007a					0	0.0769231	0	0	0	0	0	0.125	0.0714286	0	0.166667	0
425286	45426	species	ascomycete sp. CH-Aa18					0	0	0	0	0	0	0	0.125	0	0	0	0
430999	1233474	genus	Knufia					0.571429	0.153846	0	1	0.333333	0	0	0.625	0.428571	1	0.333333	1
431023	205932	genus	Phacidiella					0	0	0.25	0	0	0	0	0	0	0	0.0833333	0
431030	431023	species	Phacidiella eucalypti					0	0	0	0	0	0	0	0	0	0	0.0833333	0
432005	29000	class	Cystobasidiomycetes					0.785714	0.615385	0.5	0.5	1	0.5	0	0.875	0.857143	1	0.916667	1
432006	432005	order	Erythrobasidiales					0.428571	0.384615	0	0	0.333333	0.25	0	0.75	0.357143	1	0.583333	1
434363	100034	species	Massariosphaeria roumeguerei					0.571429	0.307692	0.25	0.5	0.333333	0	1	0.375	0.785714	0	0.5	0.5
438769	42303	species	Cercophora acanthigera					0	0	0	0	0	0	0	0	0.0714286	0	0	0
445181	668547	genus	Phaeothecoidea					0.714286	0.615385	0.5	1	0	0.25	1	0.25	0.642857	1	0.583333	0
446943	112497	species	Ramularia sp. KACC 42532					0.214286	0.230769	0	0	0	0	1	0.375	0	1	0	0
451442	451435	order	Rhizophydiales					0.285714	0.0769231	0	0.5	0.333333	0.25	0	0	0.214286	0	0.0833333	0
451864	4751	subkingdom	Dikarya					1	1	1	1	1	1	1	1	1	1	1	1
451867	147541	subclass	Dothideomycetidae					1	1	1	1	1	0.5	1	1	1	1	1	1
451869	159987	order	Botryosphaeriales					0.785714	0.384615	0.5	1	0	0.5	0	0.5	0.785714	1	0.666667	0.5
451870	147545	subclass	Chaetothyriomycetidae					0.928571	0.692308	0.5	1	0.333333	0.5	0	1	1	1	0.916667	1
452226	452225	family	Candelariaceae					0	0.0769231	0.25	0.5	0	0	0	0.125	0	0	0	0.5
452227	1520791	order	Umbilicariales					0	0.0769231	0	0	0	0	0	0	0	0	0	0
452283	452284	class	Exobasidiomycetes					0.142857	0.307692	0.25	0	0	0	0	0.25	0.285714	0	0	0
452338	355688	order	Corticiales					0.357143	0.461538	0.25	1	0.333333	0	1	0.75	0.285714	1	0.5	0
452563	134362	family	Cladosporiaceae		Davidiellaceae		Cladosporiaceae (Sacc.) Nann., 1934	1	1	1	1	1	0.5	1	1	1	1	1	1
453767	5506	no rank	Fusarium dimerum species complex					0.0714286	0	0	0	0	0	0	0.125	0.142857	0	0.0833333	0
456999	1322061	species	Rhizoctonia solani		Rhizoctonia praticola			0	0	0	0	0	0	0	0.125	0	0	0	0
460509	432005	no rank	Cystobasidiomycetes incertae sedis					0.714286	0.615385	0.5	0.5	0.333333	0.5	0	0.625	0.857143	0	0.75	0.5
460848	104249	species	Candelaria pacifica					0	0	0.25	0.5	0	0	0	0.125	0	0	0	0.5
464692	1535529	genus	Chaetospermum					0.0714286	0	0	0	0	0	0	0	0.0714286	0	0.0833333	0
464696	464695	species	Giulia tenuis					0	0	0	0	0	0	0	0	0.0714286	0	0	0
467151	1167810	species	Betamyces americaemeridionalis				Betamyces americaemeridionalis Letcher 2012	0	0	0	0	0.333333	0	0	0	0	0	0	0
470018	452563	genus	Rachicladosporium					0.642857	0.692308	1	1	0.333333	0.25	1	0.875	0.785714	0	0.666667	0.5
470063	452563	genus	Toxicocladosporium					0	0.0769231	0.25	0	0	0	0	0.125	0.285714	0	0.25	0
470080	37937	species	Ramichloridium apiculatum					0.0714286	0	0	0	0	0	0	0	0.0714286	0	0	0.5
470099	470097	species	Radulidium sp. CBS 115704					0.0714286	0.0769231	0.25	0	0	0	0	0.25	0.0714286	0	0.166667	0.5
470111	1111112	genus	Sympoventuria					0.0714286	0.0769231	0	0	0	0	0	0.125	0.142857	0	0	0
470130	668547	genus	Catenulostroma					0.0714286	0	0	0	0	0	0	0.125	0.0714286	0	0	0.5
470439	237462	species	Anungitopsis speciosa					0.0714286	0	0	0	0	0	0	0.125	0.0714286	0	0	0
470456	1341135	species	Camptophora hylomeconis		Cyphellophora hylomeconis		Camptophora hylomeconis (Crous, de Hoog & H.D. Shin) Reblova & Unter. 2013	0.0714286	0	0	0	0	0	0	0	0	0	0	0
474943	5125	family	Cordycipitaceae					0.214286	0.0769231	0.25	0	0	0	0	0.125	0.0714286	0	0.0833333	0
483470	43220	species	Capronia sp. 97004c					0	0	0	0	0	0	0	0	0	0	0	0.5
486728	194286	order	Urostylida					0	0.0769231	0	0	0	0	0	0	0	0	0	0
487628	1582909	genus	Pleiochaeta					0.142857	0	0	0.5	0	0	0	0	0.0714286	0	0.0833333	0
490731	1884633	genus	Kwoniella					0	0.0769231	0.25	0	0	0	0	0.125	0.214286	0	0.0833333	0.5
502745	651026	species	Endosporium populi-tremuloidis					0.571429	0.153846	0	0	0	0.5	0	0	0.285714	0	0.333333	0
509727	93809	genus	Jattaea					0	0.0769231	0	0	0	0	0	0	0	0	0.0833333	0
511707	5206	species	Cryptococcus sp. SJ11L08					0	0	0	0	0	0	0	0.125	0	0	0	0
515146	134362	no rank	unclassified Capnodiales					0.214286	0.153846	0	0	0	0.25	0	0.25	0.214286	0	0.166667	0
523340	5043	species	Acremonium sp. BCC 14080					0	0.0769231	0	0.5	0	0.25	0	0.25	0	0	0	0
531437	237584	species	Teratosphaeria sp. CPC 13963					0.0714286	0.0769231	0.25	0	0	0	0	0.125	0.214286	0	0.0833333	0
531857	100025	genus	Gloniopsis					0	0.0769231	0.25	0.5	0	0	0	0	0.0714286	0	0.25	0
531859	603431	genus	Glonium					0.0714286	0	0	0	0	0	0	0	0	0	0	0
532535	89443	species	soil fungal sp. DM2-279					0	0	0	0	0	0	0	0.125	0	0	0.0833333	0
535763	1615853	species	Cystobasidiomycetes sp. BI218					0.142857	0	0	0	0	0	0	0.125	0.142857	0	0.0833333	0
565392	129384	genus	Allantophoma					0.142857	0	0	0	0	0	0	0	0	0	0	0
565398	5020	genus	Chaetosphaeronema					0.214286	0	0	0	0.333333	0	0	0.125	0	0	0.166667	0
565407	565406	species	Pseudorobillarda phragmitis					0.642857	0.153846	0	1	0.666667	0.5	1	0.625	0.428571	0	0.25	0.5
565434	242511	species	Selenophoma linicola					0	0.0769231	0	0.5	0	0	0	0	0.0714286	0	0.0833333	0.5
566087	405928	species	Hydnobolites cerebriformis					0.0714286	0	0	0	0	0	0	0.125	0	0	0	0
570524	45148	species	Lophiostoma sp. CBS 123543					0	0	0	0	0	0	0	0.125	0	0	0	0
575986	153036	species	Helotiaceae sp. 795_3_CZ02					0	0	0	0	0	0	0	0.125	0	0	0	0
603431	715341	family	Gloniaceae					0.142857	0.0769231	0.25	0	0	0	0	0.125	0	0	0	0
604195	115784	genus	Cyberlindnera		Lindnera			0	0	0	0	0	0	0	0	0	0	0	0.5
610139	13000	species	Chalara siamense					0	0	0	0	0	0	0	0.125	0	0	0	0
634182	316340	species	Chaetothyriales sp. TRN1		Chaetothyriales sp.TRN1			0.142857	0.0769231	0	0	0	0	0	0.125	0.285714	0	0.25	0.5
639021	222544	order	Magnaporthales				Magnaporthales Thongkantha, Vijaykrishna & K.D. Hyde 2009	0	0	0	0.5	0.333333	0	0	0	0.0714286	0	0	0
644758	71662	species	Monodictys sp. 148					0	0.153846	0	0	0	0	0	0	0	0	0	0
648923	33194	species	Bipolaris sp. HSAUP074449					0.142857	0	0	0	0	0	0	0	0	0	0	0
652292	150231	species	Pezizomycotina sp. 11120					0.0714286	0	0	0	0	0	0	0	0	0	0	0
652430	147549	no rank	unclassified Pezizomycetes					0.214286	0.0769231	0.25	0.5	0	0	0	0.125	0	0	0.0833333	0
652431	5206	species	Cryptococcus sp. ZIM 2300					0	0	0	0	0	0	0	0.125	0	0	0	0
657374	105767	species	Tremella aff. globispora IMUFRJ 52033					0	0	0	0	0	0	0	0.125	0	0	0	0
663566	716546	class	Geoglossomycetes				Geoglossomycetes Zheng Wang, C.L. Schoch & Spatafora 2009	0.0714286	0	0	0	0	0	0	0	0	0	0	0
668547	134362	family	Teratosphaeriaceae					0.857143	0.923077	1	1	0.666667	0.25	1	0.875	0.857143	1	0.916667	1
673153	189359	genus	Bagadiella					0.714286	0.538462	0.75	0.5	0.333333	0.25	1	0.625	0.642857	1	0.666667	0.5
679529	237584	species	Teratosphaeria crispata				Teratosphaeria crispata Carnegie 2011	0.0714286	0	0	0	0	0	0	0	0	0	0	0
683158	715340	family	Didymellaceae				Didymellaceae Gruyter, Aveskamp & Verkley 2009	1	1	1	1	1	0.5	1	0.875	1	1	1	1
687987	159075	species	Acremonium curvulum					0.142857	0	0	0	0	0	0	0	0	0	0	0
703475	221678	genus	Tremateia					0	0	0	0	0	0	0	0.125	0.0714286	0	0	0
703494	703493	species	Mauritiana rhizophorae				Mauritiana rhizophorae Poonyth, K.D. Hyde, Aptroot & Peerally 2000	0	0	0	0	0.333333	0	0	0	0	0	0	0
703499	147569	species	Myriangium hispanicum				Myriangium hispanicum J.B. Martnez 1931	0	0.0769231	0	0	0	0	0	0	0	0	0	0
706557	1508290	species	Neodevriesia lagerstroemiae		Capnodiales sp. WQ-2013m;Devriesia lagerstroemiae		Devriesia lagerstroemiae Crous & M.J. Wingf. 2009;Neodevriesia lagerstroemiae (Crous & M.J. Wingf.) Crous, 2015	0.357143	0.0769231	0.25	0	0	0	0	0.125	0.214286	0	0	0
708513	34448	species	Marasmius sp. RR-2010d					0	0.0769231	0	0	0	0	0	0	0	0	0	0
714941	714940	genus	Tetraplosphaeria					0	0	0	0	0.333333	0	0	0	0	0	0	0
715292	92860	family	Amniculicolaceae				Amniculicolaceae Yin. Zhang, C.L. Schoch, J. Fourn., Crous & K.D. Hyde 2009	0.142857	0	0	0	0	0	0	0	0	0	0	0
715298	1255046	family	Lentitheciaceae				Lentitheciaceae Yin. Zhang, C.L. Schoch, J. Fourn., Crous & K.D. Hyde 2009	0.785714	0.615385	0.75	1	0.666667	0.25	1	0.875	0.785714	1	0.916667	0.5
715340	92860	suborder	Pleosporineae					1	1	1	1	1	0.5	1	1	1	1	1	1
715989	716546	no rank	sordariomyceta					1	1	1	1	1	0.5	1	1	1	1	1	1
716545	4890	no rank	saccharomyceta					1	1	1	1	1	0.5	1	1	1	1	1	1
716546	147538	no rank	leotiomyceta					1	1	1	1	1	0.5	1	1	1	1	1	1
718227	55176	no rank	Preussia/Sporomiella species complex					0.714286	0.461538	0.75	1	0.333333	0	0	0.375	0.428571	0	0.333333	1
718241	718228	species	Sporormiella megalospora		Preussia megalospora;Sporormia megalospora			0.0714286	0.0769231	0	0	0	0	0	0	0	0	0	0
742177	584654	species	Anteholosticha monilata		Anteholosticha sp. ZLv-2015b;Anteholosticha sp. Zlv-2015		Anteholosticha monilata (Kahl, 1928) Berger, 2003 in Berger (2006, p. 297)	0	0.0769231	0	0	0	0	0	0	0	0	0	0
744530	134362	family	Dissoconiaceae				Dissoconiaceae Crous & de Hoog 2010	0.0714286	0.0769231	0.25	0.5	0	0	0	0	0.214286	0	0	0.5
744552	100051	species	Delitschia anisomera				Delitschia anisomera Luck-Allen & Cain 1975	0.142857	0	0	0	0	0	0	0	0	0	0.0833333	0
749461	683158	genus	Boeremia					0.285714	0.153846	0	0	0	0	0	0.375	0.142857	0	0.0833333	0
754277	89443	species	fungal sp. KRP11					0	0	0	0	0	0	0	0	0.0714286	0	0	0
757955	89443	species	fungal sp. ARIZ AZ0512					0	0	0	0	0	0	0	0	0	1	0	0
758395	89443	species	fungal sp. ARIZ AZ1016					0.142857	0.153846	0	0	0	0	0	0.375	0	0	0	0
758403	89443	species	fungal sp. ARIZ AZ1029					0	0.153846	0	0	0	0.25	0	0.25	0.214286	1	0	0
758427	89443	species	fungal sp. ARIZ AZ1063					0	0.0769231	0	0	0	0	0	0	0	0	0	0
761740	89443	species	fungal sp. DA-S-2					0.214286	0	0	0	0.333333	0	0	0.125	0.0714286	1	0.0833333	0.5
766758	766764	genus	Schwanniomyces				Schwanniomyces Klocker 1909	0	0	0	0	0	0	0	0	0.0714286	0	0	0
766764	4892	family	Debaryomycetaceae				Debaryomycetaceae Kurtzman et M. Suzuki 2010	0	0.0769231	0	0	0	0	1	0	0.0714286	0	0.166667	0
767018	5114	family	Diaporthaceae				Diaporthaceae Hohn. ex Wehm. 1926	0.642857	0.153846	0	0.5	0.666667	0.25	1	0.5	0.5	0	0.5	0
796413	314149	species	Acanthostigma multiseptatum				Acanthostigma multiseptatum Promputtha & A.N. Mill. 2010	0	0	0	0	0	0	0	0	0.0714286	0	0	0
857077	79808	species	Coniochaeta sp. CHTAR121					0	0	0.25	0	0	0	0	0.125	0.142857	0	0.166667	0
859500	39180	species	Corticium boreoroseum				Corticium boreoroseum Boidin & Lanq. 1983	0	0	0	0	0	0	0	0.125	0	0	0	0
861973	89443	species	fungal sp. mh2223.6					0.142857	0	0	0	0	0.25	0	0.25	0.142857	0	0	0
872982	412481	species	Asteromella pistaciarum				Asteromella pistaciarum Bremer & Petr. 1947	0.0714286	0.0769231	0	0	0	0	0	0.125	0.214286	0	0.0833333	0.5
879691	286563	species	Devriesia sp. NG_p52					0	0	0	0	0	0	0	0.125	0.0714286	0	0	0
886458	652430	species	Pezizomycetes sp. WF148					0.0714286	0	0	0	0	0	0	0.125	0	0	0	0
942743	412475	species	Microbotryomycetes sp. TMS-2011					0	0	0	0	0	0	0	0	0.0714286	0	0	0
947208	105767	species	Tremella lobariacearum				Tremella lobariacearum Diederich & M.S. Christ. 1996	0	0	0	0	0	0	0	0	0.0714286	0	0	0
980150	316340	species	Chaetothyriales sp. M-Cre1-1					0	0	0	0	0	0	0	0.125	0	0	0	0
980695	165440	species	Dioszegia sp. YM24626					0.5	0.0769231	0.25	1	0	0	0	0.375	0.285714	0	0.333333	0
981071	3700	tribe	Brassiceae				Brassiceae DC., 1821	0.0714286	0.0769231	0.25	0	0.333333	0	0	0	0.142857	0	1	0.5
990923	38240	species	Basidiomycota sp. zzz1735					0	0	0	0	0	0	0	0	0.0714286	0	0	0
997780	37839	species	Dothideales sp. 1 NF-2011					0.642857	0.692308	0.25	0.5	0	0.5	0	0.375	0.714286	1	0.333333	0
998209	172614	species	Flavoparmelia citrinescens		Parmelia citrinescens		Flavoparmelia citrinescens (Gyelnik) O. Blanco, A. Crespo & Elix 2010;Parmelia citrinescens Gyelnik 1938	0	0.230769	0	0	0	0	0	0.125	0.0714286	0	0.166667	0.5
1041186	105767	species	Tremella phaeophysciae				Tremella phaeophysciae Diederich & M.S. Christ. 1996	0	0	0	0	0	0	0	0	0.0714286	0	0	0
1046566	3618	species	Rumex hypogaeus		Emex australis		Emex australis Steinh.;Rumex hypogaeus T.M.Schust. & Reveal	0	0	0	0	1	0	0	0	0	0	0	0
1047167	93133	genus	Zymoseptoria					0.285714	0.0769231	0	0	0	0	1	0	0.0714286	0	0.0833333	0
1049287	5583	species	Exophiala capensis					0.214286	0.0769231	0.25	0.5	0	0	0	0	0.285714	0	0	0
1049288	467980	species	Penidiella aggregata					0	0.0769231	0	0	0	0	0	0.25	0	0	0.0833333	0
1051142	1051141	species	Camarosporula persooniae		Hendersonia persooniae		Camarosporula persooniae (Henn.) Petr.;Hendersonia persooniae Henn.	0	0	0	0	0	0	0	0	0.0714286	0	0	0
1052096	5498	species	Cladosporium halotolerans				Cladosporium halotolerans Zalar, de Hoog & Gunde-Cimerman 2007	0	0	0	0	0	0	0	0.125	0	0	0	0.5
1053258	110618	genus	Thelonectria					0.0714286	0	0	0	0	0	0	0	0	0	0	0
1053489	451869	no rank	unclassified Botryosphaeriales					0.642857	0.307692	0.25	0	0	0	0	0.125	0.214286	1	0.166667	0.5
1078995	89443	species	fungal sp. BAN-D					0.142857	0	0	0	0	0	0	0	0	0	0	0
1084402	89443	species	fungal sp. 347A TTMM-2011					0.0714286	0	0	0	0	0	0	0	0	0	0	0
1091488	5533	species	Rhodotorula sp. 2 MAC-2011b					0.0714286	0	0.25	0	0	0	0	0	0	0	0	0
1093203	265079	species	Coccomyces proteae					0.571429	0.230769	0	0.5	0	0.25	0	0.375	0.357143	0	0.166667	0
1093212	1508290	species	Neodevriesia capensis		Teratosphaeria capensis		Neodevriesia capensis (Crous) Crous, 2015;Teratosphaeria capensis Crous 2011	0.0714286	0.0769231	0	0	0	0	0	0.25	0.357143	0	0	1
1105073	81067	species	Chytridiomycota sp. LLME1_1 PML-2011i					0.285714	0	0	0	0	0	0	0	0.142857	0	0	0
1108623	89443	species	fungal sp. CZ-2011j					0	0.0769231	0	0	0	0	0	0	0	0	0.0833333	0
1111111	159987	order	Venturiales				Venturiales Yin. Zhang, C.L. Schoch & K.D. Hyde 2011	0.571429	0.230769	0.25	0	0	0.25	1	0.375	0.357143	0	0.166667	1
1111112	1111111	family	Sympoventuriaceae				Sympoventuriaceae Yin. Zhang, C.L. Schoch & K.D. Hyde	0.285714	0.153846	0.25	0	0	0.25	1	0.25	0.285714	0	0	0.5
1120191	5533	species	Rhodotorula sp. M14					0.571429	0.153846	0	0.5	0	0.25	0	0.375	0.214286	0	0.166667	0
1122585	314149	species	Acanthostigma chiangmaiense		Acanthostigma chiangmaiensis		Acanthostigma chiangmaiense Boonmee & K.D. Hyde 2011	0	0	0.25	0	0	0	0	0	0.0714286	0	0	0
1129334	467802	species	Rhizophydiales sp. 1 MV-2011					0.214286	0	0	0	0	0	0	0	0.0714286	0	0.0833333	0
1130102	71598	subfamily	Graphidoideae				Graphidoideae Rivas Plata, Lcking and Lumbsch 2012	0	0	0	0	0	0	0	0.125	0	0	0	0
1130689	138063	species	Seiridium banksiae				Seiridium banksiae Crous & Summerell 2011	0	0	0	0	0	0	0	0	0	0	0.0833333	0
1131624	5042	family	Thermoascaceae				Thermoascaceae Apinis 1967	0	0.0769231	0	0	0	0	0	0	0	0	0.0833333	0
1150193	165440	species	Dioszegia sp. YM24421					0.285714	0	0	0.5	0	0	0	0.125	0.0714286	0	0.333333	0
1179179	1084655	species	Delastria rosea				Delastria rosea Tul. & C. Tul. 1843	0.0714286	0	0	0	0	0	0	0.125	0.0714286	0	0	0
1179690	5543	species	Trichoderma sp. KBS0814F					0.0714286	0	0	0	0.333333	0	0	0	0	1	0	0.5
1180586	209473	species	Dothideomycetes sp. genotype 252					0.214286	0.0769231	0	0	0	0	0	0.125	0.142857	0	0	1
1180614	209473	species	Dothideomycetes sp. genotype 376					0.0714286	0	0	0	0	0	0	0	0	0	0	0
1187120	714650	species	cf. Herpothallon sp. BRY C56027					0	0	0	0	0	0	0	0.125	0	0	0	0
1196446	103886	genus	Dinemasporium					0.857143	0.307692	0.5	1	0.666667	0.25	0	0.75	0.571429	1	0.333333	1
1196454	103886	genus	Pseudolachnea					0.142857	0.0769231	0	0	0	0	0	0.25	0.142857	0	0.166667	0
1196455	1196454	species	Pseudolachnea fraxini				Pseudolachnea fraxini Crous 2012	0.142857	0.0769231	0	0	0	0	0	0.25	0.142857	0	0.166667	0
1198470	1198468	species	Entylomatales sp. RP					0	0.0769231	0.25	0	0	0	0	0	0	0	0	0
1198983	2170432	genus	Disculoides					0.0714286	0	0.25	0	0	0	0	0	0.0714286	0	0	0
1208471	68764	species	Geastrum sp. TNS KH-AUS10-72					0	0	0	0	0	0	0	0.125	0	0	0	0
1208924	1033978	genus	Lectera					0.571429	0.307692	0.25	1	0.666667	0.25	0	0.25	0.357143	1	0.583333	0
1213737	574935	genus	Schizopora					0.0714286	0	0	0.5	0	0	0	0.125	0.0714286	0	0.0833333	0
1218809	412507	species	Tremellales sp. CCFEE 5196					0.142857	0	0	0	0	0	0	0	0.214286	0	0.0833333	0
1218810	412507	species	Tremellales sp. CCFEE 5612					0.0714286	0	0	0	0	0	0	0.125	0.142857	0	0	0
1219434	412507	species	Tremellales sp. SAP708.3					0.214286	0.153846	0.25	0.5	0.666667	0	0	0	0.285714	1	0.25	0
1219436	5220	species	Trimorphomyces sp. SAP1008.3					0.214286	0	0	0	0	0	0	0.125	0.0714286	0	0.583333	0
1219449	5206	species	Cryptococcus sp. SAP963.4					0	0	0	0	0	0	0	0	0.0714286	0	0	0
1224812	1343192	species	Deniquelata barringtoniae				Deniquelata barringtoniae Ariyawansa & K.D. Hyde 2013	0.214286	0	0	0	0.333333	0	0	0	0.0714286	0	0	0.5
1234632	79808	species	Coniochaeta canina		Lecythophora canina			0.428571	0.0769231	0	0	0.333333	0	0	0.5	0.0714286	0	0.25	0.5
1255046	92860	suborder	Massarineae					1	0.923077	1	1	1	0.5	1	1	1	1	1	1
1258667	45426	species	Ascomycota sp. EK28					0.142857	0.0769231	0	0	0	0	0	0	0	0	0.0833333	0.5
1280617	13201	species	Phaeococcomyces eucalypti					0	0.0769231	0	0	0	0	0	0	0	0	0.0833333	0
1296608	411563	species	Minimedusa cf. polyspora X-14					0.0714286	0	0	0.5	0	0	0	0	0	0	0.0833333	0
1301143	88646	subfamily	Xanthorioideae					0.142857	0	0	0	0	0	0	0	0	0	0	0.5
1302176	107465	suborder	Teloschistineae					0.142857	0	0	0	0	0	0	0.125	0	0	0	0.5
1302238	39937	subfamily	Buellioideae					0.142857	0.0769231	0	0	0.333333	0	0	0.25	0.142857	0	0.0833333	0.5
1303434	1898458	species	Pseudocoleophoma polygonicola				Pseudocoleophoma polygonicola Kaz. Tanaka & K. Hiray., 2015	0	0	0	0	0	0	0	0.125	0	0	0	0
1303459	100032	species	Keissleriella culmifida		Leptosphaeria culmifida;Metasphaeria culmifida;Sphaeria culmifida;Trichometasphaeria culmifida		Keissleriella culmifida (P. Karst.) S.K. Bose, 1961	0.142857	0.0769231	0.25	0.5	0	0	0	0.125	0	0	0.166667	0
1303514	36922	species	Diaporthe toxica					0.428571	0.153846	0	0.5	0.333333	0.25	1	0.125	0.142857	0	0.166667	0
1312586	89443	species	fungal sp. F188					0.0714286	0.0769231	0	0.5	0	0	0	0.125	0	0	0	0
1332277	88747	species	Acarospora thamnina		Lecanora cervina var. thamnina			0.428571	0.384615	0.5	0.5	0.333333	0.5	1	0.625	0.285714	0	0.333333	0
1342378	28556	genus	Comoclathris					0.357143	0.153846	0.5	0	0	0	0	0	0.0714286	0	0	0
1351845	64899	genus	Pseudoseptoria					0.214286	0.230769	0.25	0	0	0	0	0.375	0.214286	0	0.25	0.5
1352506	5206	species	Cryptococcus sp. CBS 12710					0	0.0769231	0	0	0	0	0	0	0.0714286	0	0	0
1354935	43220	species	Capronia sp. BRO-2013					0.0714286	0	0	0	0	0	0	0	0	0	0	0
1385568	1385567	species	Etayoa trypethelii				Etayoa trypethelii (Flakus & Kukwa) Diederich & Ertz	0	0.0769231	0	0	0	0	0	0	0.0714286	0	0	0
1423643	209473	species	Dothideomycetes sp. LS-2013g					0.142857	0	0	0	0	0	0	0	0.0714286	0	0.0833333	0
1423644	1837870	species	Spissiomyces ramosus				Spissiomyces ramosus L. Su, L.Y. Guo & Xing.Z. Liu, 2016	0.214286	0.0769231	0.25	0	0	0	0	0.125	0.214286	0	0.25	0
1434221	1515431	species	Apenidiella strumelloidea		Cladosporium strumelloideum;Penidiella strumelloidea			0	0	0	0	0.333333	0.25	0	0	0.0714286	0	0	0
1446840	1297910	species	Gyrothrix verticillata				Gyrothrix verticillata Piroz., 1962	0.0714286	0	0	0.5	0	0	0	0	0	0	0.0833333	0
1450326	92860	family	Lophiotremataceae				Lophiotremataceae K. Hiray. & Kaz. Tanaka, 2011	0	0	0	0	0	0	0	0	0.214286	0	0.0833333	0
1468175	5206	species	Cryptococcus sp. DEC24					0	0	0	0	0	0	0	0	0	0	0	0.5
1477511	13201	species	Phaeococcomyces mexicanus		Phaeococcomyces mexicana		Phaeococcomyces mexicanus O. Moreno-Rico & Crous, 2014	0.357143	0.307692	0.25	0	0	0	0	0	0.142857	1	0.0833333	0.5
1496571	150231	species	Pezizomycotina sp. PAH2_7					0.214286	0.384615	0	0	0.333333	0	0	0.25	0.285714	0	0.0833333	0
1499099	103886	genus	Pseudolachnella					0.285714	0.230769	0.25	0.5	0	0	0	0.375	0.214286	0	0.0833333	0.5
1504671	100051	species	Delitschia confertaspora					0.0714286	0	0	0	0	0	0	0	0	0	0	0
1506662	358905	species	Serendipita sp. MAFF 305841					0	0	0	0	0	0	0	0.125	0	0	0	0
1507903	1971361	genus	Diplolaeviopsis				Diplolaeviopsis Giralt & D. Hawksw., 1991	0	0.0769231	0	0	0	0	0	0	0.0714286	0	0	0.5
1507904	1507903	species	Diplolaeviopsis ranula				Diplolaeviopsis ranula Giralt & D. Hawksw., 1991	0	0	0	0	0	0	0	0	0	0	0	0.5
1508183	134362	family	Neodevriesiaceae				Neodevriesiaceae Quaedvlieg & Crous, 2014	0.357143	0.153846	0.25	0	0.333333	0	0	0.375	0.428571	1	0.0833333	1
1508249	1667166	genus	Alfaria					0.571429	0.153846	0.25	1	1	0	0	0.5	0.571429	0	0.333333	0.5
1508290	1508183	genus	Neodevriesia					0.357143	0.153846	0.25	0	0	0	0	0.375	0.428571	1	0.0833333	1
1515416	668547	genus	Austroafricana					0.642857	0.692308	0.5	1	0.333333	0.5	1	0.5	0.785714	1	0.5	0.5
1515428	668547	genus	Neocatenulostroma					0.142857	0.0769231	0	0	0	0	0	0.125	0.142857	0	0.166667	0
1515432	668547	genus	Parateratosphaeria					0.0714286	0.230769	0	0	0	0	0	0.25	0.0714286	0	0.0833333	0
1515438	668547	genus	Myrtapenidiella					0.428571	0.307692	0	0.5	0.333333	0	1	0.125	0.428571	1	0.333333	0
1515599	668547	genus	Pseudoteratosphaeria					0	0	0	0	0	0	0	0.125	0.0714286	0	0	0
1518507	111584	species	Buellia punctata		Amandinea punctata;Lecidea punctata			0.0714286	0	0	0	0.333333	0	0	0.25	0	0	0	0
1520881	147547	no rank	OSLEUM clade					0.642857	0.769231	0.5	0	0.666667	0.5	0	0.75	0.5	1	0.583333	1
1521060	37234	species	Spiromastix asexualis		Spiromastigodes asexualis		Spiromastix asexualis D. A. Sutton, L. Rizzo, Stchigel & Guarro, 2014	0	0	0	0	0	0	0	0	0.0714286	0	0	0
1524403	45426	species	Ascomycota sp. 3 IP-2014					0	0	0.25	0	0	0	0	0	0	0	0	0
1524408	1053489	species	Botryosphaeriales sp. 1 IP-2014					0.571429	0.153846	0.25	0	0	0	0	0	0.214286	1	0.0833333	0.5
1524426	54695	species	Helotiales sp. 4 IP-2014					0	0	0	0	0	0	0	0.25	0	0	0	0
1524444	243625	species	Venturiaceae sp. IP-2014					0.0714286	0.0769231	0	0	0	0.25	0	0.125	0.142857	0	0	1
1524830	1615853	species	Cystobasidiomycetes sp. DSM 28479					0.0714286	0	0	0	0	0	0	0	0	0	0	0
1536653	116785	species	Amandinea coniops		Buellia coniops;Lecidea coniops			0.0714286	0	0	0	0	0	0	0	0.0714286	0	0	0
1538025	42302	genus	Echria				Echria (N. Lundq.) Kruys, Huhndorf and A.N. Mill.,	0	0	0	0	0	0	0	0.125	0	0	0	0
1540118	92860	family	Thyridariaceae		Roussoellaceae			0.0714286	0.0769231	0	0	0	0	0	0	0	0	0	0
1541030	92862	species	Pleosporales sp. KO-groupE 2014					0	0	0	0	0	0	0	0	0.0714286	0	0	0.5
1541146	316340	species	Chaetothyriales sp. MP-2014					0	0	0.25	0	0	0	0	0	0	0	0	0
1541441	314148	species	Helicoma sp. NRRL 66050					0	0.0769231	0	0	0	0	0	0	0	0	0	0
1542784	39679	species	Arthonia mediella		Opegrapha mediella			0.0714286	0	0.25	0	0	0	0	0	0.0714286	0	0.0833333	0
1559925	1635105	species	Cyclopsomyces plurioperculatus				Cyclopsomyces plurioperculatus K. Seto & Y. Degawa, 2015	0.0714286	0	0	0	0	0	0	0	0	0	0	0
1562865	286563	species	Devriesia sp. ZWY-2014b					0	0	0	0	0	0	0	0.25	0.0714286	0	0	0
1565365	89443	species	fungal sp. C1/08					0.214286	0	0	0	0	0	0	0.125	0	0	0.0833333	0
1570301	5014	family	Saccotheciaceae		Aureobasidiaceae;Saccotheciei			1	1	1	1	1	0.5	1	0.875	1	1	1	1
1572707	159987	order	Tubeufiales					0.571429	0.615385	0.5	1	0	0.5	1	0.625	0.571429	0	0.5	0
1581159	5234	family	Rhynchogastremataceae					0.928571	0.461538	0.25	1	0.666667	0.5	0	0.875	0.642857	1	0.833333	0.5
1581692	5533	species	Rhodotorula sp. UFMG-ABT656					0	0.0769231	0	0	0	0	0	0	0	1	0	0.5
1585410	151555	species	Eurotiomycetes AZ1057					0	0.0769231	0.25	0	0	0	0	0.25	0	0	0	0
1586329	38240	species	Basidiomycota sp. 4 IP-2014					0.0714286	0	0	0	0	0	0	0	0	0	0	0
1589771	34374	genus	Sphaerellopsis				Sphaerellopsis Cook, 1883	0.0714286	0	0	0	0	0	0	0	0.0714286	0	0.0833333	0
1602727	62131	species	Capnobotryella sp. 130A					0	0	0	0	0	0	0	0	0.0714286	0	0	0
1604202	37840	species	Pestalotiopsis sp. CJL-2014					0.214286	0	0	0.5	0	0	1	0	0.142857	0	0	0
1615853	432005	no rank	unclassified Cystobasidiomycetes					0.214286	0	0	0	0	0	0	0.125	0.214286	0	0.166667	0
1618111	1618100	no rank	Phaeomoniellales incertae sedis					0.428571	0.384615	0.25	0.5	0	0	0	0.5	0.571429	1	0.166667	0.5
1623265	37234	species	Spiromastix sp. CBS 138268					0	0	0	0	0	0	0	0	0.0714286	0	0	0
1634513	110618	genus	Xenogliocladiopsis					0.0714286	0.0769231	0	0	0	0.25	0	0	0.142857	0	0	0
1634515	1634513	species	Xenogliocladiopsis cypellocarpa		Xenogliocladiopsis cypellocarpum		Xenogliocladiopsis cypellocarpa L. Lombard & Crous, 2015	0.0714286	0.0769231	0	0	0	0.25	0	0	0.142857	0	0	0
1647800	1329062	species	Terana caerulea		Byssus caerulea;Byssus coerulea;Terana coerulea		Terana caerulea (Schrad. ex Lam.) Kuntze, 1891	0	0.0769231	0.25	0	0	0	0	0	0.0714286	0	0	0
1652681	5206	species	Cryptococcus sp. yHKS491					0	0.0769231	0	0	0	0	0	0	0	0	0	0
1654578	1508298	species	Circinotrichum maculiforme		Psilonia maculiformis		Circinotrichum maculiforme Nees, 1817	0	0	0	0	0	0	0	0.125	0	0	0	0
1656977	45426	species	Ascomycota sp. UNEX FECRGA 2012E484					0.0714286	0	0	0.5	0	0.25	0	0.125	0	0	0	0
1664452	316340	species	Chaetothyriales sp. G4.5E1d					0.0714286	0.0769231	0.25	0.5	0	0	0	0	0.0714286	0	0	0
1664454	316340	species	Chaetothyriales sp. G7.5F1a2					0.0714286	0	0	0	0	0	0	0	0.0714286	0	0	0
1667166	5125	family	Stachybotryaceae		Stachybotriaceae			1	0.769231	1	1	1	0.5	1	1	0.928571	1	0.833333	1
1671274	5020	genus	Wojnowiciella					0.142857	0	0	0	0	0	0	0.125	0.0714286	0	0	0
1671301	1618111	genus	Pseudophaeomoniella					0.142857	0	0	0	0	0	0	0.125	0.142857	0	0	0
1679014	162454	genus	Fusariella					0.428571	0.0769231	0.25	1	0	0	0	0	0.142857	0	0.0833333	0
1679015	1679014	species	Fusariella sinensis				Fusariella sinensis H.M. Liu & T.Y. Zhang, 2006	0.428571	0.0769231	0.25	1	0	0	0	0	0.142857	0	0.0833333	0
1682408	1682405	genus	Selenodriella					0	0.0769231	0	0	0	0	0	0	0.0714286	0	0	0
1682409	1682408	species	Selenodriella cubensis				Selenodriella cubensis Hern.-Restr. & Crous, 2015	0	0.0769231	0	0	0	0	0	0	0.0714286	0	0	0
1688507	415704	species	Tausonia sp. KBP 4496					0.0714286	0.0769231	0.25	0.5	0	0	0	0	0.214286	0	0.25	0
1690601	430999	species	Knufia marmoricola				Knufia marmoricola Onofri & Zucconi, 2015	0	0	0	0.5	0	0	0	0	0.0714286	0	0.0833333	0
1697545	139141	species	cf. Tubulicrinis sp. 7 LR-2015					0.0714286	0	0	0.5	0	0	0	0	0.0714286	0	0	0
1702109	1932622	species	Brunneoclavispora bambusae				Brunneoclavispora bambusae Phook. & K.D. Hyde, 2015	0	0	0	0	0	0	0	0.125	0	0	0	0
1707701	37463	species	Phoma sp.					0	0	0	0	0	0	0	0	0.0714286	0	0	0
1709937	366822	species	Lecanoromycetes sp.					0	0	0.25	0	0	0	0	0	0.142857	0	0	0
1709938	159638	species	Leotiomycetes sp.					0.285714	0.0769231	0	0	0	0.5	0	0.25	0.142857	0	0.166667	0
1709939	45426	species	Ascomycota sp.					0	0	0	0	0	0	0	0.125	0.142857	0	0.0833333	0
1709941	89443	species	fungal sp.					0.642857	0.461538	0.5	0.5	0.333333	0.25	0	0.5	0.357143	1	0.166667	0
1718875	5583	species	Exophiala sp.					0	0	0	0	0	0	0	0	0.0714286	0	0.0833333	0
1738095	5255	species	Dacrymyces sp. KA12-0403					0.142857	0	0	0	0	0	0	0.25	0	0	0.166667	0
1738763	89443	species	fungal sp. F6_OT2A-300					0	0	0	0	0	0	0	0	0.0714286	0	0	0
1750783	316340	species	Chaetothyriales sp. A1022					0.0714286	0	0	0	0	0	0	0	0	0	0	0.5
1750907	1663550	species	Lichenostigmatales sp. A930					0.642857	0.307692	0.25	0.5	0.333333	0.25	0	0.75	0.428571	1	0.333333	1
1755422	47744	species	Cistella sp.					0.0714286	0	0	0	0	0	0	0	0	0	0	0
1755443	92862	species	Pleosporales sp.					0.571429	0.461538	0.75	1	0.333333	0.5	0	0.375	0.5	1	0.333333	0.5
1755765	756399	species	Tayloriella erythrosticta		Lecanora erythrosticta		Tayloriella erythrosticta (Taylor) S. Y. Kondr., Krnefelt, A. Thell, Elix, J. Kim, A. S. Kondratiuk & J.-S. Hur, 2015	0	0	0	0	0	0	0	0.125	0	0	0	0.5
1756098	515146	species	Capnodiales sp.					0	0	0	0	0	0	0	0	0.0714286	0	0	0
1756114	155415	species	Monosporascus sp.					0.0714286	0	0	0	0	0	0	0	0	0	0	0
1759442	1851469	family	Trichosporonaceae					0	0	0	0	0	0	0	0.125	0	0	0	0
1763018	147498	genus	Cryptocoryneum					0	0.0769231	0	0	0	0	0	0.125	0	0	0.0833333	0
1769453	290882	genus	Semifissispora					0.642857	0.153846	0.25	1	0	0.25	0	0.25	0.357143	1	0.333333	0
1769455	1769453	species	Semifissispora natalis				Semifissispora natalis Crous, J. Edwards & P.W.J. Taylor, 2015	0.642857	0.153846	0	1	0	0.25	0	0.25	0.357143	1	0.25	0
1769456	1769453	species	Semifissispora rotundata				Semifissispora rotundata H.J. Swart, 1982	0	0	0	0	0	0	0	0.125	0	1	0	0
1770170	683158	genus	Neoascochyta					0.642857	0.692308	0.5	0.5	0	0.25	0	0.25	0.571429	0	0.5	0.5
1792690	1792689	species	Crumenulopsis sororia		Crumenula sororia		Crumenulopsis sororia (P. Karst.) J.W. Groves, 1969	0	0.0769231	0	0	0	0	0	0	0	0	0	0
1798079	47022	species	Orbilia sp. HOB-2016ay					0	0.0769231	0	0	0	0	0	0	0	1	0	0
1798808	460509	genus	Symmetrospora					0.571429	0.538462	0.5	0.5	0.333333	0.5	0	0.5	0.642857	0	0.75	0
1798813	460509	genus	Buckleyzyma					0.214286	0.153846	0	0	0	0	0	0.125	0.357143	0	0.0833333	0
1798851	452282	genus	Phyllozyma					0	0	0	0	0	0.25	0	0.125	0	0	0	0
1798857	48847	genus	Pseudobensingtonia					0	0.0769231	0	0	0	0.25	0	0	0.0714286	0	0	0
1798865	48846	family	Kondoaceae					0.214286	0.307692	0.25	0	0.333333	0	0	0.375	0.142857	0	0.583333	0.5
1798998	222545	no rank	unclassified Xylariomycetidae					0	0	0	0	0	0	0	0.125	0	0	0	0
1799696	231213	family	Sporidiobolaceae					0.785714	0.615385	1	1	0	0.75	1	0.875	1	1	0.75	0.5
1799703	1799696	genus	Rhodosporidiobolus					0.0714286	0	0	0	0	0	0	0	0.142857	0	0	0
1799785	162483	family	Chrysozymaceae					0.928571	0.461538	0.25	1	0.333333	0.5	1	0.75	0.785714	0	0.916667	0.5
1801565	1799785	genus	Sampaiozyma					0.928571	0.461538	0.25	1	0.333333	0.5	1	0.75	0.785714	0	0.916667	0.5
1802941	45307	genus	Pseudostrickeria					0	0.0769231	0	0	0	0	0	0	0	0	0	0
1802942	1802941	species	Pseudostrickeria muriformis				Pseudostrickeria muriformis Wanasinghe, Q. Tian, Camporesi & K.D. Hyde, 2015	0	0.0769231	0	0	0	0	0	0	0	0	0	0
1812776	37989	family	Sporocadaceae					0.5	0.153846	0	0.5	0	0	1	0.25	0.428571	1	0.5	0
1828766	55176	genus	Sparticola					0	0	0	0	0	0	0	0	0	0	0.0833333	0
1834865	5206	species	Cryptococcus sp. 9.L31					0	0	0.25	0	0	0	0	0.25	0	0	0	0
1834872	62074	species	Sarcinomyces sp. 9.L27					0.214286	0.153846	0	0	0	0	0	0	0.357143	0	0	0
1835684	531413	species	Lamiales environmental sample					0.0714286	0	0	0	0	0.25	0	0	0.142857	0	0	0
1844887	55067	species	Phaeosphaeria sp. CX					0.214286	0	0	0.5	0	0	0	0	0.142857	1	0.166667	1
1850153	5583	species	Exophiala sp. DTO 305-D1					0.0714286	0	0.25	0	0	0	0	0.25	0	0	0	0
1851470	1851469	family	Tetragoniomycetaceae				Tetragoniomycetaceae Oberw. & Bandoni, 1981	0.214286	0.307692	0	0	0	0.25	0	0.125	0.214286	1	0.0833333	0
1851509	5408	genus	Naganishia					0.285714	0	0	0.5	0	0	0	0.125	0.214286	0	0.416667	0
1851551	90883	family	Mrakiaceae					0.357143	0.230769	0.25	0.5	0	0	0	0	0.5	0	0.333333	0
1851555	5408	genus	Heterocephalacria					0.214286	0.153846	0	0	0	0	0	0.125	0.214286	0	0.0833333	0
1852212	45426	species	Ascomycota sp. 1 PV-2016					0.0714286	0	0	0	0	0	0	0	0	0	0	0
1853264	2059301	species	Dematiopleospora cirsii				Dematiopleospora cirsii Wanas., Camporesi, E.B.G. Jones & K.D. Hyde, 2015, nom.inval.;Dematiopleospora cirsii Wanas., Camporesi, E.B.G. Jones & K.D. Hyde, 2017	0.214286	0.153846	0	0	0.333333	0	0	0.125	0.214286	1	0.166667	0.5
1853266	703475	species	Tremateia arundicola				Tremateia arundicola Wanas., E.B.G. Jones & K.D. Hyde, 2016	0	0	0	0	0	0	0	0.125	0.0714286	0	0	0
1859699	1859696	species	Albifimbria verrucaria		Myrothecium verrucaria;Peziza verrucaria		Albifimbria verrucaria (Alb. & Schwein.) L. Lombard & Crous, 2016	0	0	0	0	0	0	0	0.125	0	0	0	0
1859940	1667166	genus	Paramyrothecium					0.428571	0.153846	0.25	0	0.333333	0	0	0.25	0.285714	0	0.0833333	0.5
1871383	92987	species	Phaeotheca salicorniae				Phaeotheca salicorniae Crous & Roets, 2016	0.0714286	0.0769231	0	0	0	0	0	0	0	0	0	0.5
1871902	284609	species	Strigula nitidula				Strigula nitidula Mont., 1842	0.428571	0.307692	0.25	0.5	0	0	0	0.375	0.357143	0	0.416667	0
1873266	93133	genus	Neopseudocercosporella					0	0	0	0	0	0	0	0	0	0	0.0833333	0
1874898	1231880	species	Trechisporales sp.					0.0714286	0	0	0	0	0	0	0	0	0	0	0
1882907	1197700	species	Microbotryozyma sp. C2-13					0.0714286	0.0769231	0	0	0	0	0	0	0.0714286	0	0	0
1884633	5234	family	Cryptococcaceae					1	1	0.75	1	1	0.5	1	1	1	1	1	1
1890237	5234	family	Trimorphomycetaceae					0.571429	0.153846	0	0.5	0	0.25	0	0.375	0.5	0	0.583333	0
1890241	1890238	species	Carlosrosaea sp. 1 ML-2016					0.0714286	0.0769231	0	0	0	0.25	0	0.25	0.142857	0	0	0
1890244	1890237	genus	Saitozyma					0.5	0.0769231	0	0.5	0	0	0	0.25	0.285714	0	0.333333	0
1890245	1890244	species	Saitozyma sp. BSB 30					0.0714286	0	0	0	0	0	0	0	0	0	0	0
1890680	268179	species	Cryptotrichosporon brontae		Cryptotrichosporon brontus		Cryptotrichosporon brontae O. Rohl, A. Yurkov & J. P. Sampaio, 2017	0	0	0	0	0	0	0	0	0.142857	0	0	0
1891666	1671297	species	Neophaeomoniella sp.					0	0	0	0	0	0	0	0	0.0714286	0	0	0
1891946	1884640	genus	Vishniacozyma					1	0.538462	0.5	1	0.666667	0.75	1	0.875	0.928571	1	1	0.5
1898320	1255046	family	Dictyosporiaceae					0.285714	0.0769231	0.25	0.5	0.333333	0	0	0.25	0.142857	1	0.166667	0.5
1898406	1255055	genus	Fuscostagonospora					0.0714286	0	0	0.5	0	0	0	0	0	0	0.0833333	0
1898421	715496	genus	Clypeoloculus					0.142857	0	0	0	0	0	0	0	0	0	0	0
1898458	1898320	genus	Pseudocoleophoma					0.285714	0	0	0.5	0.333333	0	0	0.125	0.0714286	1	0.166667	0.5
1905114	1905112	genus	Phaeotremella					0	0.153846	0	0	0	0	0	0.25	0.142857	0	0	0
1909749	1905116	genus	Genolevuria				Genolevuria X.Z. Liu, F.Y. Bai, M. Groenew. & Boekhout, 2015	0.428571	0.384615	0	1	0.333333	0.25	1	0.5	0.285714	0	0.416667	0
1910893	5234	family	Cuniculitremaceae					0	0.153846	0	0	0	0.25	1	0	0	0	0	0
1910953	37989	family	Bartaliniaceae					0.857143	0.461538	0.25	1	0.333333	0.5	0	0.5	0.785714	1	0.75	1
1911176	1508249	species	Alfaria spartii				Alfaria spartii Senan., Camporesi & K.D. Hyde, 2016	0.142857	0	0	0	0	0	0	0	0	0	0	0.5
1917373	5206	species	Cryptococcus sp. DV-2016a					0.714286	0.692308	0.5	1	0.333333	1	0	0.875	0.857143	1	0.916667	0.5
1919753	209473	species	Dothideomycetes sp. genotype 724 JMUR-2016					0	0	0	0	0	0	0	0.125	0	0	0	0
1919922	89443	species	fungal sp. genotype 824 JMUR-2016					0	0.0769231	0	0	0	0	0	0	0	0	0	0
1929954	1572707	family	Bezerromycetaceae					0.5	0.307692	0.25	0.5	0	0.25	1	0.375	0.428571	0	0.416667	0
1955089	47274	species	Dactylaria sp.					0.0714286	0	0	0	0	0	0	0.125	0	0	0	0
1956015	1956014	species	Clypeophysalospora latitans		Physalospora latitans		Clypeophysalospora latitans (Sacc.) H.J. Swart, 1981;Physalospora latitans Sacc., 1893	0.571429	0.461538	0	1	0.333333	0.25	0	0.5	0.5	0	0.5	0
1960599	78388	species	Coniothyrium hakeae				Coniothyrium hakeae Crous & Barber, 2016	0.428571	0.230769	0	0.5	0	0	1	0.125	0.5	1	0.25	0.5
1960841	1960840	species	Neoscolecobasidium agapanthi				Neoscolecobasidium agapanthi Crous, 2016	0	0.0769231	0	0	0	0	0	0	0.214286	0	0	0
1960861	371108	species	Saccharata eucalyptorum				Saccharata eucalyptorum Crous, 2016	0.142857	0	0.25	0	0	0	0	0.25	0.357143	0	0.25	0.5
1960863	371108	species	Saccharata hakeicola				Saccharata hakeicola Crous, 2016	0	0	0	0	0	0	0	0	0.0714286	0	0	0
1960873	1589771	species	Sphaerellopsis hakeae				Sphaerellopsis hakeae Crous, 2016	0.0714286	0	0	0	0	0	0	0	0.0714286	0	0.0833333	0
1961798	56761	species	Cyanodermella oleoligni				Cyanodermella oleoligni van Nieuwenhuijzen & Samson, 2016	0	0	0.25	0	0	0	0	0	0	0	0	0
1962182	37883	genus	Banhegyia					0.142857	0.0769231	0.25	0	0	0	0	0.25	0.142857	0	0	0.5
1962184	1962182	species	Banhegyia cf. setispora G.M. 2015-04-29.1					0.142857	0.0769231	0	0	0	0	0	0.125	0.0714286	0	0	0.5
1966419	470063	species	Toxicocladosporium hominis		Toxicocladosporium sp. UTHSC DI-13-172		Toxicocladosporium hominis Sandoval-Denis, Gene & Deanna A. Sutton, 2016	0	0.0769231	0.25	0	0	0	0	0.125	0.214286	0	0.166667	0
1968649	1968648	species	Corticifraga peltigerae		Belonidium peltigerae;Peziza peltigerae;Pseudopeziza peltigerae		Corticifraga peltigerae (Fuckel) D. Hawksw. & R. Sant., 1990;Peziza peltigerae Fuckel, 1871	0.0714286	0.0769231	0	0	0	0	0	0.375	0.0714286	0	0.0833333	0
1971361	5178	family	Cordieritidaceae					0.0714286	0.0769231	0	0	0	0	0	0	0.0714286	0	0	0.5
1971362	5178	family	Cenangiaceae		Hemiphacidiaceae			0.0714286	0.153846	0	0	0	0.25	0	0.125	0.142857	0	0.0833333	0
1971737	1234780	species	Lyomyces mascarensis				Lyomyces mascarensis Riebesehl, Yurchenko & E. Langer , 2017	0	0	0	0	0	0	0	0	0	0	0.0833333	0
1981958	162477	genus	Pseudomicrostroma					0	0.0769231	0	0	0	0	0	0	0	0	0	0
1983418	2034146	species	Chlamydomonas sp. JIAC4					0	0	0	0	0	0	0	0	0.142857	0	0	0
1986134	278881	species	Myriangiales sp.					0	0.0769231	0.25	0	0	0	0	0	0.0714286	0	0	0
1986326	50931	genus	Lepra				Lepra Scop., 1777	0	0	0	0	0	0	0	0.125	0	0	0	0
2012700	5296	species	Puccinia bassiae				Puccinia bassiae Samuel, 1924	0	0.153846	0	0.5	0	0	0	0	0	0	0.0833333	0
2014862	2014861	species	Davidiellomyces australiensis				Davidiellomyces australiensis Crous, 2017	0.0714286	0.0769231	0.25	0	0	0	0	0.125	0.0714286	0	0.0833333	0
2015261	100032	species	Keissleriella cirsii				Keissleriella cirsii R.H. Perera, Bulgakov, Wanasinghe & K.D. Hyde, 2017	0.0714286	0	0	0	0	0	0	0	0.142857	0	0	0
2015380	2066858	species	Delonicicola siamense				Delonicicola siamense R.H. Perera, Maharachch. & K.D. Hyde, 2017	0.214286	0	0	0	0	0	0	0	0	0	0	0
2020803	2020802	species	Malvales environmental sample					0	0.0769231	0	0	0	0	0	0	0	0	0	0
2020818	2020817	species	Asparagales environmental sample					0.571429	0.153846	0.25	1	0.666667	0	0	0.375	0.5	1	0.166667	0.5
2027812	2027811	species	Classiculaceae sp. YH-2017a					0	0.0769231	0	0	0	0	0	0	0	0	0	0
2046349	5206	species	Cryptococcus sp.					0	0.0769231	0	0	0	0	0	0	0	0	0	0
2054742	93492	species	Pringsheimia sp.					0.0714286	0	0	0	0	0	0	0	0	0	0	0
2059301	5020	genus	Dematiopleospora					0.214286	0.153846	0	0	0.333333	0	0	0.125	0.214286	1	0.166667	0.5
2080711	91806	species	Trapelia elacista				Trapelia elacista (Ach.) Orange, 2018	0.0714286	0	0	0	0	0	0	0	0	0	0	0
2081971	1851575	species	Solicoccozyma sp.					0.0714286	0	0	0	0	0	0	0.125	0.142857	0	0.0833333	0
2086676	1898406	species	Fuscostagonospora cytisi				Fuscostagonospora cytisi Jayasiri, Camporesi & K.D. Hyde, 2017	0.0714286	0	0	0.5	0	0	0	0	0	0	0.0833333	0
2093500	2093499	species	Fitzroyomyces cyperi				Fitzroyomyces cyperi Crous, 2017	0.0714286	0.0769231	0	0	0	0	0	0	0	0	0.0833333	0
2093506	2093505	species	Neoconiothyrium persooniae				Neoconiothyrium persooniae Crous, 2017	0.0714286	0.0769231	0	0	0	0	0	0	0	0	0	0
3051	3042	family	Chlamydomonadaceae					0	0	0	0	0	0	0	0	0.214286	0	0	0
3166	3041	class	Chlorophyceae				Chlorophyceae Christensen, 1994	0.357143	0	0	0.5	0	0	0	0	0.285714	0	0	0
3524	1437201	order	Caryophyllales		Centrospermae		Caryophyllales Juss. ex Bercht. & J.Presl, 1820	0	0	0	0	1	0	0	0	0.0714286	0	0	0
3699	91836	order	Brassicales		Capparales			0.0714286	0.0769231	0.25	0	0.333333	0	0	0	0.142857	0	1	0.5
4027	41943	family	Geraniaceae	geranium family			Geraniaceae Juss., 1789	0	0	0	0	0	0.75	0	0	0.0714286	0	0	0
4854	214503	family	Mortierellaceae					0	0	0	0	0	0	0	0.125	0	0	0	0
4892	4891	order	Saccharomycetales		Endomycetales			0.214286	0.0769231	0	0	0	0	1	0	0.214286	0	0.166667	0.5
4893	4892	family	Saccharomycetaceae					0.214286	0	0	0	0	0	0	0	0.0714286	0	0.0833333	0
5009	5008	family	Taphrinaceae					0	0	0	0	0	0	0	0	0.0714286	0	0	0
5043	129384	genus	Acremonium					0	0.0769231	0	0.5	0	0.25	0	0.25	0	0	0	0
5103	33183	family	Ascosphaeraceae					0	0	0	0	0	0	0	0.125	0	0	0	0
5133	110618	genus	Nectria					0	0	0	0	0	0	0	0	0.142857	0	0	0
5215	5234	family	Tremellaceae					0.928571	0.769231	0.75	1	0.666667	0.25	0	0.75	1	1	0.833333	0.5
5226	355688	order	Auriculariales					0.142857	0	0.25	0.5	0	0	0	0	0.0714286	0	0.0833333	0
5227	5226	family	Auriculariaceae					0	0	0	0.5	0	0	0	0	0	0	0	0
5245	5244	family	Septobasidiaceae					0	0	0	0	0	0	0	0	0.142857	0	0	0
5255	5254	genus	Dacrymyces					0.142857	0	0	0	0	0	0	0.25	0	0	0.166667	0
5262	5258	family	Pucciniaceae					0.142857	0.384615	0.5	0.5	0	0	0	0.375	0.357143	0	0.333333	0
5263	5262	genus	Uromyces					0	0	0	0	0	0	0	0.125	0	0	0	0
5267	5257	order	Ustilaginales	smut fungi;smuts				0.0714286	0.0769231	0.25	0	0	0	0	0.125	0.214286	0	0	0
5279	62916	family	Tilletiaceae					0	0.0769231	0	0	0	0	0	0	0.0714286	0	0	0
5309	80628	genus	Athelia					0	0	0	0	0	0	0	0.125	0	0	0	0
5339	5338	family	Agaricaceae		Battarreaceae			0	0.0769231	0	0	0	0	0	0	0	0	0	0.5
5408	90886	family	Filobasidiaceae					1	1	1	1	1	0.5	1	1	1	1	1	1
5426	5338	family	Lycoperdaceae					0	0	0	0	0	0	0	0	0.142857	0	0.0833333	0
5890	291294	genus	Tetrahymena					0	0	0	0	0	0	0	0	0.0714286	0	0	0
13000	159639	genus	Chalara					0	0	0	0	0	0	0	0.125	0	0	0	0
13786	42111	genus	Trebouxia				Trebouxia Puymaly, 1924	0.285714	0.0769231	0	0.5	0	0.25	1	0.5	0.214286	0	0	0
27310	28984	genus	Cephaloascus					0	0	0	0	0	0	0	0	0	0	0	0
27330	5008	family	Protomycetaceae					0.428571	0.307692	0	0.5	0	0.25	0	0.5	0.357143	0	0.333333	0
29865	103887	genus	Nectriopsis					0.142857	0	0	0.5	0	0	0	0.25	0.0714286	0	0.166667	0
33159	5185	family	Helvellaceae					0.142857	0	0	0	0	0	0	0	0.0714286	0	0	0
34371	5120	family	Erysiphaceae					0.214286	0.307692	0.25	0.5	0	0.25	0	0.25	0.0714286	0	0.416667	0.5
34372	34371	genus	Blumeria					0.142857	0.153846	0.25	0	0	0	0	0	0	0	0.25	0.5
34418	204043	family	Cystobasidiaceae					0.5	0	0.5	0.5	0.333333	0	0	0.5	0.5	0	0.416667	0
34479	34478	family	Spizellomycetaceae					0.0714286	0.0769231	0	0	0	0	0	0	0.0714286	0	0.0833333	0
37240	221903	family	Myxotrichaceae					0.0714286	0	0	0	0	0	0	0.125	0	0	0	0
37883	37882	family	Patellariaceae		Lecanidiaceae			0.142857	0.0769231	0.25	0	0	0	0	0.25	0.142857	0	0	0.5
38462	110844	genus	Lambertella					0.214286	0.0769231	0	0	0	0	0	0.125	0.142857	0	0.25	0
39678	39677	family	Arthoniaceae					0.0714286	0	0.25	0	0	0	0	0.125	0.0714286	0	0.166667	0
39933	157822	family	Lecanoraceae					0	0	0	0	0	0	0	0	0.0714286	0	0	0
39941	39940	genus	Mycocalicium					0	0	0.25	0	0	0	0	0	0	0	0	0
40111	39677	family	Roccellaceae					0	0	0	0	0	0	0	0	0	0	0	0.5
40424	139380	family	Hymenochaetaceae					0	0	0.25	0	0	0	0	0	0	0	0	0
40653	665637	genus	Wallrothiella					0.0714286	0	0	0	0	0	0	0	0	0	0	0
41954	5338	family	Amanitaceae					0	0.0769231	0	0	0	0	0	0	0	0	0	0
42803	77634	genus	Spongiochloris				Spongiochloris Starr, 1955	0.214286	0	0	0.5	0	0	0	0	0.142857	0	0	0
46451	292491	family	Thelebolaceae					0.285714	0.384615	0.25	0.5	0	0	1	0	0.0714286	0	0.25	0
46635	64899	genus	Hormonema					0.642857	0.538462	0.5	0	0	0.25	0	0.25	0.571429	0	0.5	0
47166	147548	order	Rhytismatales					0.571429	0.230769	0.25	0.5	0	0.25	0	0.5	0.5	0	0.333333	0
47196	5186	genus	Iodophanus					0.5	0	0	0.5	0	0	0	0.25	0.285714	0	0.0833333	0
47218	5189	genus	Saccobolus					0.142857	0	0	0	0	0	0	0	0	0	0.0833333	0
48846	162480	order	Agaricostilbales					0.214286	0.384615	0.25	0	0.333333	0.25	0	0.5	0.214286	0	0.583333	0.5
48847	48846	family	Agaricostilbaceae					0	0.0769231	0	0	0	0.25	0	0.125	0.0714286	0	0	0
50931	88639	family	Pertusariaceae					0	0	0	0	0	0	0	0.125	0	0	0	0
54683	110844	genus	Lanzia					0.0714286	0.0769231	0	0	0.333333	0	0	0	0.0714286	0	0	0
55071	55070	family	Microbotryaceae					0.0714286	0.0769231	0	0	0	0	0	0.125	0.0714286	0	0	0
56189	5338	family	Podaxaceae					0.0714286	0	0	0	0	0	0	0	0	0	0	0
56761	56757	genus	Cyanodermella					0	0	0.25	0	0	0	0	0	0	0	0	0
62131	668547	genus	Capnobotryella					0	0	0	0	0	0	0	0	0.0714286	0	0	0
62133	134362	family	Capnodiaceae					0.285714	0.153846	0	0.5	0.333333	0.5	0	0.375	0.0714286	0	0	0
62911	62910	family	Entorrhizaceae					0.214286	0.0769231	0	0.5	0	0	0	0	0.0714286	0	0	0
62917	162475	family	Microstromataceae					0.0714286	0	0	0	0	0	0	0	0	0	0	0
64515	1396497	genus	Rhizophlyctis					0.214286	0	0	0	0	0	0	0	0	0	0	0
68763	157608	family	Geastraceae					0	0	0	0	0	0	0	0.125	0	0	0	0
68793	68792	genus	Botryobasidium					0	0	0	0	0	0	0	0.125	0	0	0	0
68808	56487	family	Typhulaceae					0	0	0.25	0	0	0	0	0	0	0	0	0
71662	147498	genus	Monodictys					0	0.153846	0	0	0	0	0	0	0	0	0	0
71934	5338	family	Entolomataceae					0.0714286	0	0	0	0	0	0	0.125	0	0	0.0833333	0
73564	129384	genus	Aporospora					0	0	0	0	0	0	0	0	0.0714286	0	0	0
75748	56757	genus	Glomerobolus					0.142857	0.0769231	0.25	0	0.333333	0	0	0.125	0.214286	0	0	0
77634	3042	no rank	Chlamydomonadales incertae sedis		Chlorococcales incertae sedis;Volvocales incertae sedis			0.285714	0	0	0.5	0	0	0	0	0.214286	0	0	0
78388	1460697	genus	Coniothyrium					0.428571	0.230769	0	0.5	0	0	1	0.125	0.5	1	0.25	0.5
81067	4761	no rank	unclassified Chytridiomycota					0.285714	0	0	0	0	0	0	0	0.142857	0	0	0
82267	332899	genus	Hyaloraphidium					0	0	0	0	0	0	0	0	0	0	0	0
85904	1974272	family	Vorticellidae					0	0	0	0	0	0	0	0	0	0	0	0
89802	68798	genus	Hyphoderma					0.0714286	0	0	0	0	0	0	0	0.0714286	0	0	0
90883	155616	order	Cystofilobasidiales		Heterobasidiomycetidae			0.785714	0.538462	0.75	1	0	0.25	1	0.75	0.714286	0	0.833333	0
93492	64899	genus	Pringsheimia					0.0714286	0	0	0	0	0	0	0	0	0	0	0
93809	93808	family	Calosphaeriaceae					0	0.0769231	0	0	0	0	0	0	0	0	0.0833333	0
100034	147498	genus	Massariosphaeria					0.571429	0.307692	0.25	0.5	0.333333	0	1	0.375	0.785714	0	0.5	0.5
100051	221679	genus	Delitschia					0.214286	0	0	0	0	0	0	0	0	0	0.0833333	0
103393	452342	family	Peniophoraceae					0	0	0	0	0	0	0	0	0.142857	0	0	0
104249	452226	genus	Candelaria					0	0	0.25	0.5	0	0	0	0.125	0	0	0	0.5
104350	5338	family	Crepidotaceae					0	0	0.25	0	0	0	0	0	0	0	0	0
104366	5338	family	Pleurotaceae					0	0	0	0	0	0	1	0.125	0	0	0	0
107465	388435	order	Teloschistales					0.142857	0	0	0	0	0	0	0.125	0	0	0	0.5
109763	109762	genus	Harpochytrium					0.142857	0	0	0	0	0	0	0	0	0	0	0
110158	5139	no rank	Sordariales incertae sedis					0.0714286	0	0.25	0	0	0	0	0	0	0	0	0
110846	5185	family	Pyronemataceae					0.0714286	0	0	0	0	0	0	0	0	0	0	0
111584	1302238	genus	Buellia					0.0714286	0	0	0	0.333333	0	0	0.25	0.0714286	0	0	0
112071	432008	genus	Naohidea					0	0	0	0	0.333333	0	0	0.125	0	0	0	0
115784	4892	family	Phaffomycetaceae		Wickerhamomycetaceae			0	0	0	0	0	0	0	0	0.0714286	0	0	0.5
116785	1302238	genus	Amandinea					0.0714286	0	0	0	0	0	0	0	0.0714286	0	0	0
129384	4890	no rank	Ascomycota incertae sedis					0.857143	0.692308	1	1	0.666667	0.5	0	1	0.571429	0	0.833333	1
131567	1	no rank	cellular organisms		biota			1	1	1	1	1	1	1	1	1	1	1	1
139141	202723	genus	Tubulicrinis					0.0714286	0.0769231	0	0.5	0	0	0	0	0.142857	0	0	0
139971	103886	genus	Menispora					0	0.0769231	0	0	0	0	0	0	0	0	0	0
146291	451870	order	Verrucariales					0.142857	0.0769231	0	0	0	0	0	0	0.142857	0	0.25	0
147379	147367	tribe	Ehrharteae				Ehrharteae Nevski, 1937	0	0.0769231	0	0	0	0	0	0	0.0714286	0	0	0
147383	147368	tribe	Stipeae				Stipeae Dumort., 1824	0	0	0.25	0	0	0	0	0	0.0714286	0	0	0
147388	147368	tribe	Bromeae				Bromeae Dumort., 1824	0	0.307692	0.25	0	0	0	0	0	0.0714286	0	0	0
147544	92860	family	Teichosporaceae		Floricolaceae			0.214286	0.230769	0.25	0	0	0	0	0.375	0.428571	0	0.0833333	1
147549	147538	class	Pezizomycetes					0.857143	0.307692	0.25	1	0.666667	0.25	1	0.5	0.428571	1	0.333333	0
147569	147568	genus	Myriangium					0	0.0769231	0	0	0	0	0	0	0	0	0	0
148959	431959	genus	Wallemia					0	0	0	0	0	0	0	0	0.0714286	0	0	0
150231	147538	no rank	unclassified Pezizomycotina					0.214286	0.384615	0	0	0.333333	0	0	0.25	0.285714	0	0.0833333	0
151555	147545	no rank	unclassified Eurotiomycetes					0	0.0769231	0.25	0	0	0	0	0.25	0	0	0	0
152648	152647	family	Trichosphaeriaceae					0.142857	0.307692	0	0	0	0	0	0.125	0	0	0.166667	0
152655	5114	no rank	Diaporthales incertae sedis					0	0	0	0	0	0	0	0	0	0	0.0833333	0
153036	5181	no rank	unclassified Helotiaceae					0	0	0	0	0	0	0	0.125	0	0	0	0
156300	34395	no rank	Chaetothyriales incertae sedis					0.285714	0.153846	0	0	0	0	0	0	0.357143	0	0	0
157252	5405	genus	Muribasidiospora					0	0	0	0	0	0	0	0	0.0714286	0	0	0
157821	388282	order	Acarosporales		Acarosporineae			0.428571	0.461538	0.5	0.5	0.333333	0.25	1	0.625	0.428571	0	0.416667	0.5
157822	5197	suborder	Lecanorineae					0.142857	0.307692	0.25	0	0	0	0	0.25	0.285714	1	0.25	1
160892	34426	genus	Ceratosebacina					0	0	0.25	0	0	0	0	0	0	0	0	0
162483	162481	no rank	Microbotryomycetes incertae sedis					0.928571	0.615385	0.5	1	0.333333	0.5	1	0.875	0.857143	0	0.916667	0.5
165808	90883	family	Cystofilobasidiaceae					0.714286	0.538462	0.75	1	0	0.5	1	0.75	0.642857	0	0.833333	0
172614	78060	genus	Flavoparmelia					0	0.230769	0	0	0	0	0	0.125	0.0714286	0	0.166667	0.5
184208	5338	family	Psathyrellaceae					0.142857	0.0769231	0	0	0.333333	0	0	0.125	0.285714	0	0.25	0
188544	188543	genus	Demodex					0.0714286	0.0769231	0	0	0	0	0	0	0	0	0.0833333	0
189479	189478	order	Orbiliales					0.642857	0.384615	0.5	1	0.333333	0.25	1	0.75	0.357143	1	0.5	1
191554	451868	order	Hysteriales					0.214286	0.153846	0.25	0.5	0.333333	0	0	0.125	0.214286	0	0.333333	0.5
194286	33829	subclass	Stichotrichia				Stichotrichia Small & Lynn, 1985	0	0.0769231	0	0	0	0	0	0	0	0	0	0
195796	5198	genus	Ramalea					0	0	0	0	0	0	0	0	0.0714286	0	0	0
205932	147538	no rank	Pezizomycotina incertae sedis					0.142857	0	0.25	0.5	0	0	0	0.125	0.0714286	0	0.166667	0
209470	92860	no rank	environmental samples					0	0	0	0	0	0	0	0	0.0714286	0	0	0
222545	147550	subclass	Xylariomycetidae					1	0.923077	0.75	1	1	0.5	1	0.875	1	1	0.916667	1
227329	227327	family	Pisolithaceae					0	0.0769231	0	0	0	0	0	0	0.0714286	0	0	0
227336	227332	family	Suillaceae					0	0	0	0	0	0	0	0.125	0	0	0	0
228942	5304	genus	Limonomyces					0.285714	0.307692	0.25	0.5	0.333333	0	1	0.25	0.142857	1	0.333333	0
237462	205932	genus	Anungitopsis					0.0714286	0	0	0	0	0	0	0.125	0.0714286	0	0	0
242511	148100	genus	Selenophoma					0	0.0769231	0	0.5	0	0	0	0	0.0714286	0	0.0833333	0.5
243625	5023	no rank	unclassified Venturiaceae					0.0714286	0.0769231	0	0	0	0.25	0	0.125	0.142857	0	0	1
248098	1130097	genus	Asterothyrium					0.214286	0.153846	0	0	0	0.5	0	0.5	0	0	0.25	0
261460	222544	order	Chaetosphaeriales					0.857143	0.384615	0.5	1	0.666667	0.25	0	0.875	0.642857	1	0.416667	1
265079	47167	genus	Coccomyces					0.571429	0.230769	0	0.5	0	0.25	0	0.375	0.357143	0	0.166667	0
271835	56757	genus	Acarosporina					0	0.0769231	0	0	0	0	0	0	0	0	0	0
278881	45676	no rank	unclassified Myriangiales					0	0.0769231	0.25	0	0	0	0	0	0.0714286	0	0	0
284609	714593	genus	Strigula					0.428571	0.307692	0.25	0.5	0	0	0	0.375	0.357143	0	0.416667	0
286563	668547	genus	Devriesia					0	0	0	0	0	0	0	0.25	0.142857	0	0	0
286660	159987	genus	Peltaster				Peltaster Sydow & P. Sydow 1917	0	0	0	0	0	0	0	0.125	0.0714286	0	0	0
292187	56757	genus	Carestiella					0.0714286	0.0769231	0	0	0	0	0	0.125	0.0714286	0	0.0833333	0
314148	43216	genus	Helicoma					0	0.0769231	0	0	0	0	0	0	0	0	0	0
332217	138177	genus	Neochlorosarcina				Neochlorosarcina S.Watanabe, 1983	0.214286	0	0	0.5	0	0	0	0	0.142857	0	0	0
333826	7147	no rank	environmental samples					0.0714286	0	0	0	0	0	0	0	0.0714286	0	0	0
358905	1506295	genus	Serendipita		Piriformospora			0	0	0	0	0	0	0	0.125	0	0	0	0
361669	3090	genus	Hemiflagellochloris					0	0	0	0	0	0	0	0	0.0714286	0	0	0
364710	146292	genus	Endocarpon					0.0714286	0.0769231	0	0	0	0	0	0	0.0714286	0	0.0833333	0
366822	147547	no rank	unclassified Lecanoromycetes					0	0	0.25	0	0	0	0	0	0.142857	0	0	0
399129	5114	family	Cryphonectriaceae					0.0714286	0	0	0	0	0	0	0	0	0	0	0
407091	189359	genus	Plectosphaera					0.785714	0.846154	0.75	1	0.333333	0.5	1	0.625	0.857143	1	0.833333	0.5
407949	159987	genus	Fusculina					0.214286	0.0769231	0	0	0	0.25	1	0.125	0.214286	0	0.0833333	0
412475	162481	no rank	unclassified Microbotryomycetes					0	0	0	0	0	0	0	0	0.0714286	0	0	0
412481	159987	genus	Asteromella					0.0714286	0.0769231	0	0	0	0	0	0.125	0.214286	0	0.0833333	0.5
412507	5234	no rank	unclassified Tremellales					0.428571	0.153846	0.25	0.5	0.666667	0	0	0.125	0.5	1	0.333333	0
415704	1851551	genus	Tausonia		Guehomyces			0.0714286	0.0769231	0.25	0.5	0	0	0	0	0.214286	0	0.25	0
426519	162475	family	Quambalariaceae					0	0.0769231	0	0	0	0	0	0.125	0.214286	0	0	0
451435	4761	class	Chytridiomycetes					0.357143	0.153846	0	0.5	0.333333	0.25	0	0	0.357143	0	0.166667	0
451453	451442	family	Kappamycetaceae					0.0714286	0.0769231	0	0	0	0	0	0	0.214286	0	0	0
451868	147541	subclass	Pleosporomycetidae					1	1	1	1	1	0.5	1	1	1	1	1	1
451871	147545	subclass	Eurotiomycetidae					0.142857	0.384615	0.25	0	0.333333	0	0	0.25	0.428571	0	0.25	0.5
452225	189476	order	Candelariales					0	0.0769231	0.25	0.5	0	0	0	0.125	0	0	0	0.5
452282	452281	family	Spiculogloeaceae				Spiculogloeaceae Denchev 2009	0	0	0	0	0	0.25	0	0.125	0	0	0	0
452284	5204	subphylum	Ustilaginomycotina					0.428571	0.692308	0.5	0.5	0.333333	0.25	1	0.375	0.642857	0	0.333333	1
452333	155619	subclass	Agaricomycetidae					0.357143	0.384615	0.25	0.5	0.333333	0	1	0.375	0.571429	0	0.5	1
452334	452333	order	Atheliales					0	0	0	0	0	0	0	0.125	0	0	0	0
452342	355688	order	Russulales		Hericiales;Stereales			0	0	0	0	0.333333	0	0	0.125	0.142857	0	0	0
464695	139065	genus	Giulia					0	0	0	0	0	0	0	0	0.0714286	0	0	0
467802	451442	no rank	unclassified Rhizophydiales					0.214286	0	0	0	0	0	0	0	0.0714286	0	0.0833333	0
467980	668547	genus	Penidiella					0	0.0769231	0	0	0	0	0	0.25	0	0	0.0833333	0
470097	129384	genus	Radulidium					0.0714286	0.0769231	0.25	0	0	0	0	0.25	0.0714286	0	0.166667	0.5
531413	4143	no rank	environmental samples					0.0714286	0	0	0	0	0.25	0	0	0.142857	0	0	0
565406	147498	genus	Pseudorobillarda					0.642857	0.153846	0	1	0.666667	0.5	1	0.625	0.428571	0	0.25	0.5
574935	139380	family	Schizoporaceae					0.0714286	0	0	0.5	0	0	0	0.125	0.0714286	0	0.0833333	0
584654	578128	genus	Anteholosticha				Anteholosticha Berger, 2003	0	0.0769231	0	0	0	0	0	0	0	0	0	0
599737	115784	genus	Wickerhamomyces					0	0	0	0	0	0	0	0	0.0714286	0	0	0
640623	147387	subtribe	Aveninae				Aveninae J.Presl, 1830	0	0.923077	0.5	0.5	0	0	0	0	0	0	0.0833333	0
640630	1652081	subtribe	Loliinae				Loliinae Dumort., 1829	0	0	0	0	0	0	0	0	0.857143	1	0	0
651026	703500	genus	Endosporium					0.571429	0.153846	0	0	0	0.5	0	0	0.285714	0	0.333333	0
654128	5338	family	Marasmiaceae					0	0.0769231	0	0.5	0	0	0	0	0.0714286	0	0	0
681950	1028384	family	Glomerellaceae					0.714286	0.615385	0.75	1	0.666667	0.25	0	0.5	0.642857	1	0.583333	0.5
703493	1298587	genus	Mauritiana					0	0	0	0	0.333333	0	0	0	0	0	0	0
714650	39678	genus	Herpothallon					0	0	0	0	0	0	0	0.125	0	0	0	0
714940	92860	family	Tetraplosphaeriaceae				Tetraplosphaeriaceae Kaz. Tanaka & K. Hiray 2009	0	0	0	0	0.333333	0	0	0	0	0	0	0
715341	451868	no rank	Pleosporomycetidae incertae sedis					0.142857	0.0769231	0.25	0	0	0	0	0.125	0	0	0	0
715496	1255046	family	Morosphaeriaceae				Morosphaeriaceae Suetrong, Sakayaroj, E.B.G. Jones, & C.L. Schoch 2009	0.142857	0	0	0	0	0	0	0	0	0	0	0
715962	716546	no rank	dothideomyceta					1	1	1	1	1	0.5	1	1	1	1	1	1
718228	718227	genus	Sporormiella					0.0714286	0.0769231	0	0	0	0	0	0	0	0	0	0
742845	162474	family	Malasseziaceae				Malasseziaceae Denchev & R.T. Moore 2009	0.285714	0.384615	0.25	0.5	0.333333	0.25	1	0	0.357143	0	0.333333	1
746524	102821	subtribe	Arctotidinae				Arctotidinae (Cass.) Dumort., 1829	0.5	0	0	0	0	0	0	0	0	0	0	0
756399	1755755	genus	Tayloriella				Tayloriella S. Y. Kondr., Krnefelt, A. Thell, Elix & J.-S. Hur, 2016	0	0	0	0	0	0	0	0.125	0	0	0	0.5
862241	5338	family	Physalacriaceae				Physalacriaceae Corner 1970	0	0	0	0	0	0	0	0.125	0	0	0	0
1033978	1028384	family	Plectosphaerellaceae				Plectosphaerellaceae W.Gams, Summerbell & Zare 2007	0.642857	0.307692	0.25	1	0.666667	0.25	0	0.375	0.428571	1	0.666667	0
1051141	668547	genus	Camarosporula					0	0	0	0	0	0	0	0	0.0714286	0	0	0
1084655	5186	genus	Delastria					0.0714286	0	0	0	0	0	0	0.125	0.0714286	0	0	0
1110386	1110380	tribe	Rumiceae				Rumiceae Dumort., 1827	0	0	0	0	1	0	0	0	0	0	0	0
1131492	5042	family	Aspergillaceae				Aspergillaceae Link 1826	0.142857	0.230769	0.25	0	0	0	0	0.25	0.357143	0	0.166667	0.5
1134080	34478	family	Powellomycetaceae				Powellomycetaceae D.R. Simmons	0	0	0	0	0	0	0	0	0.142857	0	0	0
1163720	231212	family	Leucosporidiaceae					0.928571	0.230769	0.5	0.5	0.666667	0.75	0	0.625	0.714286	0	0.25	0
1167810	1167809	genus	Betamyces					0	0	0	0	0.333333	0	0	0	0	0	0	0
1171044	5114	family	Harknessiaceae				Harknessiaceae Crous 2012	0.428571	0.0769231	0.25	0	0	0.25	0	0.5	0.428571	1	0.5	0
1197700	63282	genus	Microbotryozyma				Microbotryozyma Suh, Maslov, Molestina & Zhou 2012	0.0714286	0.0769231	0	0	0	0	0	0	0.0714286	0	0	0
1198468	62914	no rank	unclassified Entylomatales					0	0.0769231	0.25	0	0	0	0	0	0	0	0	0
1229510	452343	family	Hydnodontaceae				Hydnodontaceae Juelich 1981	0.0714286	0	0	0	0	0	0	0.125	0.0714286	0	0.0833333	0
1231880	452343	no rank	unclassified Trechisporales					0.0714286	0	0	0	0	0	0	0	0	0	0	0
1233474	34395	family	Trichomeriaceae				Trichomeriaceae Chomnunti & K.D. Hyde 2012	0.571429	0.153846	0	1	0.333333	0	0	0.625	0.428571	1	0.333333	1
1234780	5304	genus	Lyomyces					0	0	0	0	0	0	0	0	0	0	0.0833333	0
1255055	1255046	no rank	Massarineae incertae sedis					0.0714286	0	0	0.5	0	0	0	0	0	0	0.0833333	0
1297910	205932	genus	Gyrothrix					0.0714286	0	0	0.5	0	0	0	0	0	0	0.0833333	0
1302181	388435	order	Caliciales		Physciineae			0.214286	0.153846	0	0	0.333333	0	0	0.25	0.142857	0	0.0833333	0.5
1322061	5250	genus	Rhizoctonia					0	0	0	0	0	0	0	0.125	0	0	0	0
1329062	396331	genus	Terana					0	0.0769231	0.25	0	0	0	0	0	0.0714286	0	0	0
1341112	34395	family	Cyphellophoraceae				Cyphellophoraceae Reblova & Unter. 2013	0.142857	0.0769231	0	0	0.333333	0	0	0.25	0.142857	1	0.166667	0
1341135	66611	genus	Camptophora					0.0714286	0	0	0	0	0	0	0	0	0	0	0
1343192	221678	genus	Deniquelata					0.214286	0	0	0	0.333333	0	0	0	0.0714286	0	0	0.5
1344078	452338	no rank	Corticiales incertae sedis					0	0.153846	0	0	0	0	0	0.375	0	0	0	0
1385565	1385564	family	Phaeococcomycetaceae					0.714286	0.461538	0.25	1	0.333333	0.25	0	0.5	0.571429	1	0.583333	1
1385567	1385565	genus	Etayoa				Etayoa Diederich & Ertz, 2013	0	0.0769231	0	0	0	0	0	0	0.0714286	0	0	0
1406929	189479	no rank	Orbiliales incertae sedis					0	0	0	0	0	0	0	0	0	0	0.0833333	0.5
1424649	451869	family	Phyllostictaceae				Phyllostictaceae Fr.	0.0714286	0.0769231	0	0	0	0	0	0.125	0.0714286	0	0.0833333	0
1450292	451869	family	Saccharataceae				Saccharataceae Slippers, Boissin & Crous, 2013	0.214286	0.0769231	0.25	0	0	0	0	0.25	0.428571	0	0.5	0.5
1484953	147548	order	Phacidiales					0.428571	0.153846	0	0.5	0	0.25	0	0.25	0.5	0	0.25	0
1508298	37990	genus	Circinotrichum					0	0	0	0	0	0	0	0.125	0	0	0	0
1515431	668547	genus	Apenidiella					0	0	0	0	0.333333	0.25	0	0	0.0714286	0	0	0
1520784	1520783	family	Trapeliaceae					0.0714286	0	0	0	0	0	0	0	0	0	0.0833333	0
1520791	1520881	subclass	Umbilicariomycetidae					0	0.0769231	0	0	0	0	0	0	0	0	0	0
1535325	766764	no rank	Candida/Lodderomyces clade					0	0.0769231	0	0	0	0	0	0	0	0	0	0
1535529	297313	no rank	Sebacinales incertae sedis					0.0714286	0	0	0	0	0	0	0	0.0714286	0	0.0833333	0
1535530	5114	family	Schizoparmaceae					0.285714	0.230769	0	0	0.333333	0.5	0	0.125	0.214286	0	0.166667	0
1582909	715340	no rank	Pleosporineae incertae sedis					0.142857	0	0	0.5	0	0	0	0	0.0714286	0	0.0833333	0
1611264	204043	no rank	Cystobasidiales incertae sedis					0.0714286	0	0	0	0	0	0	0	0	0	0	0
1618100	451870	order	Phaeomoniellales				Phaeomoniellales K.-H. Chen, A.E. Arnold, Gueidan & Lutzoni, 2015	0.428571	0.384615	0.25	0.5	0	0	0	0.5	0.571429	1	0.166667	0.5
1635105	642599	genus	Cyclopsomyces					0.0714286	0	0	0	0	0	0	0	0	0	0	0
1648017	147389	subtribe	Hordeinae				Hordeinae Dumort., 1829	0	0	0.25	0	0	0	1	0	0	0	0	0
1663550	1385564	no rank	unclassified Lichenostigmatales					0.642857	0.307692	0.25	0.5	0.333333	0.25	0	0.75	0.428571	1	0.333333	1
1664131	159987	genus	Ramimonilia					0.142857	0.0769231	0	0	0.333333	0	0	0	0.0714286	0	0.0833333	0
1671297	1618111	genus	Neophaeomoniella					0	0	0	0	0	0	0	0	0.0714286	0	0	0
1676655	451871	no rank	Eurotiomycetidae incertae sedis					0	0	0	0	0	0	0	0	0.142857	0	0	0
1682405	37989	family	Microdochiaceae				Microdochiaceae Hern.-Restr., Crous & J.Z. Groenew., 2015	0.428571	0.153846	0.25	0.5	0	0	0	0.25	0.142857	1	0.0833333	0
1769247	5303	family	Fomitopsidaceae		Daedaleaceae;Piptoporaceae			0	0	0	0	0	0	0	0	0.0714286	1	0.0833333	0
1769459	5178	family	Chaetomellaceae					0.142857	0.153846	0	0	0	0	0	0.125	0.142857	0	0.0833333	0
1792689	1971362	genus	Crumenulopsis					0	0.0769231	0	0	0	0	0	0	0	0	0	0
1799786	1799785	genus	Chrysozyma					0.285714	0.153846	0	0	0	0	1	0	0	0	0.0833333	0
1803523	1799785	genus	Yunzhangia					0.428571	0.153846	0	0	0	0.5	0	0.5	0.0714286	0	0.166667	0
1804794	5268	genus	Kalmanozyma					0	0	0	0	0	0	0	0	0.0714286	0	0	0
1837870	159987	genus	Spissiomyces					0.214286	0.0769231	0.25	0	0	0	0	0.125	0.214286	0	0.25	0
1851469	155616	order	Trichosporonales				Trichosporonales Boekhout & Fell, 2001	0.214286	0.307692	0	0	0	0.25	0	0.25	0.214286	1	0.0833333	0
1851566	1851565	genus	Piskurozyma					0.0714286	0	0	0	0	0	0	0	0	0	0.0833333	0
1851575	1851565	genus	Solicoccozyma					0.0714286	0	0	0	0	0	0	0.125	0.142857	0	0.0833333	0
1859696	1667166	genus	Albifimbria					0	0	0	0	0	0	0	0.125	0	0	0	0
1884640	5234	family	Bulleribasidiaceae				Bulleribasidiaceae X.Z. Liu, F.Y. Bai, M. Groenew. & Boekhout, 2016	1	0.846154	0.5	1	1	0.75	1	0.875	1	1	1	1
1890238	1890237	genus	Carlosrosaea					0.0714286	0.0769231	0	0	0	0.25	0	0.25	0.142857	0	0	0
1898439	1255046	family	Periconiaceae					0.428571	0.0769231	0	0.5	0	0	0	0.375	0.214286	1	0	1
1905112	5234	family	Phaeotremellaceae					0	0.153846	0	0	0	0	0	0.25	0.142857	0	0	0
1905116	5234	family	Bulleraceae					0.571429	0.384615	0	1	0.333333	0.25	1	0.625	0.357143	1	0.5	0
1909748	1905116	genus	Fonsecazyma					0.214286	0.0769231	0	0	0	0	0	0	0.0714286	1	0.0833333	0
1931355	5303	family	Irpicaceae				Irpicaceae Spirin & Zmitr., 2003	0.0714286	0.153846	0	0	0	0	0	0.25	0	0	0	0
1932622	1298587	genus	Brunneoclavispora					0	0	0	0	0	0	0	0.125	0	0	0	0
1955842	159987	genus	Coniosporium					0	0.0769231	0	0	0	0	0	0	0	0	0.166667	0
1956014	189359	genus	Clypeophysalospora					0.571429	0.461538	0	1	0.333333	0.25	0	0.5	0.5	0	0.5	0
1960840	1150844	genus	Neoscolecobasidium					0	0.0769231	0	0	0	0	0	0	0.214286	0	0	0
1968648	202888	genus	Corticifraga					0.0714286	0.0769231	0	0	0	0	0	0.375	0.0714286	0	0.0833333	0
2014861	452563	genus	Davidiellomyces					0.0714286	0.0769231	0.25	0	0	0	0	0.125	0.0714286	0	0.0833333	0
2020802	41938	no rank	environmental samples					0	0.0769231	0	0	0	0	0	0	0	0	0	0
2020817	73496	no rank	environmental samples					0.571429	0.153846	0.25	1	0.666667	0	0	0.375	0.5	1	0.166667	0.5
2024004	5338	family	Mycenaceae					0	0	0	0.5	0	0	1	0	0	0	0.0833333	0
2027811	2027810	no rank	unclassified Classiculaceae					0	0.0769231	0	0	0	0	0	0	0	0	0	0
2034146	3052	no rank	unclassified Chlamydomonas					0	0	0	0	0	0	0	0	0.142857	0	0	0
2066858	2066857	genus	Delonicicola					0.214286	0	0	0	0	0	0	0	0	0	0	0
2093499	56757	genus	Fitzroyomyces					0.0714286	0.0769231	0	0	0	0	0	0	0	0	0.0833333	0
2093505	1460697	genus	Neoconiothyrium					0.0714286	0.0769231	0	0	0	0	0	0	0	0	0	0
2126968	2126967	family	Symbiotaphrinaceae					0	0.0769231	0	0	0	0	0	0	0	0	0.0833333	0.5
2170432	5114	family	Erythrogloeaceae				Erythrogloeaceae Senan. et al., 2018	0.0714286	0	0.25	0	0	0	0	0	0.0714286	0	0	0
3041	33090	phylum	Chlorophyta		Chlorophycota;Chlorophyta sensu Bremer 1985		Chlorophyta Pascher, 1914	0.357143	0.0769231	0	0.5	0	0.25	1	0.5	0.357143	0	0	0
3090	3042	family	Chlorococcaceae					0	0	0	0	0	0	0	0	0.0714286	0	0	0
4143	91888	order	Lamiales					0.0714286	0	0	0	0	0.25	0	0	0.142857	0	0	0
4761	112252	phylum	Chytridiomycota		Mastigomycotina;Monoblepharidomycota			0.428571	0.153846	0	0.5	0.333333	0.25	0	0	0.357143	0	0.166667	0
4891	147537	class	Saccharomycetes		Hemiascomycetes			0.214286	0.0769231	0	0	0	0	1	0	0.214286	0	0.166667	0.5
5008	147555	order	Taphrinales		Protomycetales			0.428571	0.307692	0	0.5	0	0.25	0	0.5	0.357143	0	0.333333	0
5120	147548	order	Erysiphales					0.214286	0.307692	0.25	0.5	0	0.25	0	0.25	0.0714286	0	0.416667	0.5
5189	5185	family	Ascobolaceae					0.142857	0	0	0	0	0	0	0	0	0	0.0833333	0
5197	388435	order	Lecanorales					0.142857	0.384615	0.25	0	0	0	0	0.625	0.357143	1	0.333333	1
5244	162484	order	Septobasidiales					0	0	0	0	0	0	0	0	0.142857	0	0	0
5254	28997	family	Dacrymycetaceae					0.142857	0	0	0	0	0	0	0.25	0	0	0.166667	0
5257	452284	class	Ustilaginomycetes					0.0714286	0.0769231	0.25	0	0	0	0	0.125	0.214286	0	0	0
5258	162484	order	Pucciniales	rust fungi	Uredinales			0.142857	0.384615	0.5	0.5	0	0	0	0.375	0.357143	0	0.333333	0
5405	5404	family	Exobasidiaceae					0	0	0	0	0	0	0	0	0.0714286	0	0	0
7147	33392	order	Diptera					0.0714286	0	0	0	0	0	0	0	0.0714286	0	0	0
28984	4892	family	Cephaloascaceae					0	0	0	0	0	0	0	0	0	0	0	0
33829	431838	class	Spirotrichea		Spirotricha;Spirotrichia;Spirotrichs		Spirotrichea Buetschli, 1889	0	0.0769231	0	0	0	0	0	0	0	0	0	0
34478	451435	order	Spizellomycetales					0.0714286	0.0769231	0	0	0	0	0	0	0.214286	0	0.0833333	0
37882	159987	order	Patellariales		Lecanidiales			0.142857	0.0769231	0.25	0	0	0	0	0.25	0.142857	0	0	0.5
39677	147539	order	Arthoniales		Opegraphales			0.0714286	0	0.25	0	0	0	0	0.125	0.0714286	0	0.166667	0.5
39940	148099	family	Mycocaliciaceae					0	0	0.25	0	0	0	0	0	0	0	0	0
41938	91836	order	Malvales					0	0.0769231	0	0	0	0	0	0	0	0	0	0
41943	91836	order	Geraniales					0	0	0	0	0	0.75	0	0	0.0714286	0	0	0
42111	75966	order	Microthamniales					0.285714	0.0769231	0	0.5	0	0.25	1	0.5	0.214286	0	0	0
55070	162481	order	Microbotryales					0.0714286	0.0769231	0	0	0	0	0	0.125	0.142857	0	0	0
56487	355688	order	Thelephorales					0	0	0.25	0	0	0	0	0	0	0	0	0
62910	62907	order	Entorrhizales					0.214286	0.0769231	0	0.5	0	0	0	0	0.0714286	0	0	0
62914	452283	order	Entylomatales					0	0.0769231	0.25	0	0	0	0	0	0	0	0	0
62916	452283	order	Tilletiales					0	0.0769231	0	0	0	0	0	0	0.0714286	0	0	0
63282	55070	family	Ustilentylomataceae					0.0714286	0.0769231	0	0	0	0	0	0	0.0714286	0	0	0
68792	36064	family	Botryobasidiaceae					0	0	0	0	0	0	0	0.125	0	0	0	0
68798	5303	family	Hyphodermataceae					0.0714286	0	0	0	0	0	0	0	0.0714286	0	0	0
73496	1437197	order	Asparagales				Asparagales Link, 1829	0.571429	0.153846	0.25	1	0.666667	0	0	0.375	0.5	1	0.166667	0.5
91836	71275	no rank	malvids					0.0714286	0.153846	0.25	0	0.333333	0.75	0	0	0.142857	0	1	0.5
93808	222544	order	Calosphaeriales					0	0.0769231	0	0	0	0	0	0	0	0	0.0833333	0
102821	219120	tribe	Arctotideae		Arctoteae		Arctotideae Cass., 1819	0.5	0	0	0	0	0	0	0	0	0	0	0
109762	79272	family	Harpochytriaceae					0.142857	0	0	0	0	0	0	0	0	0	0	0
138177	3166	order	Chlorosarcinales					0.214286	0	0	0.5	0	0	0	0	0.142857	0	0	0
139065	5302	no rank	Agaricomycotina incertae sedis					0	0	0	0	0	0	0	0	0.0714286	0	0	0
139380	355688	order	Hymenochaetales					0.142857	0.0769231	0.25	0.5	0	0	0	0.125	0.214286	0	0.0833333	0
147367	359160	subfamily	Oryzoideae		Ehrhartoideae			0	0.0769231	0	0	0	0	0	0	0.0714286	0	0	0
147368	359160	subfamily	Pooideae					0	1	1	0.5	0	0	1	0	0.928571	1	0.0833333	0
147387	1648037	tribe	Poeae				Poeae R. Br., 1814	0	0.923077	0.5	0.5	0	0	0	0	0.857143	1	0.0833333	0
147389	1648038	tribe	Triticeae				Triticeae Dumort., 1824	0	0	0.25	0	0	0	1	0	0	0	0	0
147568	45676	family	Myriangiaceae					0	0.0769231	0	0	0	0	0	0	0	0	0	0
148100	5014	no rank	Dothideales incertae sedis					0	0.0769231	0	0.5	0	0	0	0	0.0714286	0	0.0833333	0.5
152647	147551	order	Trichosphaeriales					0.142857	0.307692	0	0	0	0	0	0.125	0	0	0.166667	0
157608	452335	order	Geastrales					0	0	0	0	0	0	0	0.125	0	0	0	0
162474	1538075	order	Malasseziales					0.285714	0.384615	0.25	0.5	0.333333	0.25	1	0	0.357143	0	0.333333	1
162480	29000	class	Agaricostilbomycetes		Agaricostilbomycetidae			0.214286	0.384615	0.25	0	0.333333	0.25	0	0.5	0.214286	0	0.583333	0.5
188543	188547	family	Demodicidae					0.0714286	0.0769231	0	0	0	0	0	0	0	0	0.0833333	0
189476	147547	no rank	Lecanoromycetes incertae sedis					0	0.0769231	0.25	0.5	0	0	0	0.125	0	0	0	0.5
189478	147538	class	Orbiliomycetes					0.642857	0.384615	0.5	1	0.333333	0.25	1	0.75	0.357143	1	0.5	1
202723	139380	family	Tubulicrinaceae					0.0714286	0.0769231	0	0.5	0	0	0	0	0.142857	0	0	0
202888	5197	no rank	Lecanorales incertae sedis					0.0714286	0.0769231	0	0	0	0	0	0.375	0.0714286	0	0.0833333	0
204043	432005	order	Cystobasidiales					0.5	0	0.5	0.5	0.333333	0	0	0.5	0.5	0	0.416667	0
214503	1137986	order	Mortierellales					0	0	0	0	0	0	0	0.125	0	0	0	0
221679	92860	family	Delitschiaceae					0.214286	0	0	0	0	0	0	0	0	0	0.0833333	0
227327	68889	suborder	Sclerodermatineae					0	0.0769231	0	0	0	0	0	0	0.0714286	0	0	0
227332	68889	suborder	Suillineae					0	0	0	0	0	0	0	0.125	0	0	0	0
291294	37093	family	Tetrahymenidae					0	0	0	0	0	0	0	0	0.0714286	0	0	0
292491	147548	order	Thelebolales					0.285714	0.384615	0.25	0.5	0	0	1	0	0.0714286	0	0.25	0
332899	79272	no rank	Monoblepharidales incertae sedis					0	0	0	0	0	0	0	0	0	0	0	0
388282	147547	subclass	Acarosporomycetidae					0.428571	0.461538	0.5	0.5	0.333333	0.25	1	0.625	0.428571	0	0.416667	0.5
431959	431958	no rank	Wallemiales incertae sedis					0	0	0	0	0	0	0	0	0.0714286	0	0	0
432008	432007	family	Naohideaceae				Naohideaceae Denchev 2009	0	0	0	0	0.333333	0	0	0.125	0	0	0	0
452281	1798830	order	Spiculogloeales					0	0	0	0	0	0.25	0	0.125	0	0	0	0
452343	355688	order	Trechisporales					0.0714286	0	0	0	0	0	0	0.125	0.0714286	0	0.0833333	0
578128	486728	family	Holostichidae					0	0.0769231	0	0	0	0	0	0	0	0	0	0
642599	642598	family	Lobulomycetaceae					0.0714286	0	0	0	0	0	0	0	0	0	0	0
665637	252199	family	Amplistromataceae					0.0714286	0	0	0	0	0	0	0	0	0	0	0
703500	45676	no rank	Myriangiales incertae sedis					0.571429	0.153846	0	0	0	0.5	0	0	0.285714	0	0.333333	0
714593	1824641	family	Strigulaceae					0.428571	0.307692	0.25	0.5	0	0	0	0.375	0.357143	0	0.416667	0
1028384	222543	order	Glomerellales				Glomerellales Chadef. ex Reblova, W. Gams & Seifert 2011	0.857143	0.846154	0.75	1	0.666667	0.25	0	0.75	0.714286	1	0.916667	0.5
1110380	3615	subfamily	Polygonoideae				Polygonoideae Eaton, 1836	0	0	0	0	1	0	0	0	0	0	0	0
1130097	71598	subfamily	Gomphilloideae		Asterothyriaceae;Gomphillaceae			0.214286	0.153846	0	0	0	0.5	0	0.5	0	0	0.25	0
1150844	703495	no rank	Microthyriales incertae sedis					0	0.0769231	0	0	0	0	0	0	0.214286	0	0	0
1167809	451442	family	Alphamycetaceae				Alphamycetaceae Letcher 2008	0	0	0	0	0.333333	0	0	0	0	0	0	0
1298587	92860	family	Halotthiaceae				Halotthiaceae Y. Zhang ter, J. Fourn. & K.D. Hyde 2013	0	0	0	0	0.333333	0	0	0.125	0	0	0	0
1385564	147539	order	Lichenostigmatales					0.785714	0.615385	0.25	1	0.333333	0.25	0	0.75	0.714286	1	0.666667	1
1396497	642610	family	Rhizophlyctidaceae				Rhizophlyctidaceae Letcher	0.214286	0	0	0	0	0	0	0	0	0	0	0
1437201	91827	no rank	Pentapetalae				Pentapetalae D.E.Soltis, P.S.Soltis & W.S.Judd, 2007	0.571429	0.153846	0.25	0	1	0.75	0	0	0.357143	0	1	0.5
1460697	715340	family	Coniothyriaceae					0.5	0.307692	0	0.5	0	0	1	0.125	0.5	1	0.25	0.5
1506295	297313	family	Serendipitaceae					0	0	0	0	0	0	0	0.125	0	0	0	0
1520783	388283	order	Trapeliales					0.0714286	0	0	0	0	0	0	0	0	0	0.0833333	0
1652081	147387	no rank	Poeae Chloroplast Group 2 (Poeae type)					0	0	0	0	0	0	0	0	0.857143	1	0	0
1755755	88646	subfamily	Brownlielloideae					0	0	0	0	0	0	0	0.125	0	0	0	0.5
1851565	90886	family	Piskurozymaceae				Piskurozymaceae X.Z. Liu, F.Y. Bai, M. Groenew. & Boekhout, 2015	0.142857	0	0	0	0	0	0	0.125	0.142857	0	0.166667	0
1974272	6021	order	Sessilida				Sessilida Kahl, 1933	0	0	0	0	0	0	0	0	0	0	0	0
2027810	204044	no rank	Classiculaceae				Classiculaceae R. Bauer, Begerow, Oberw. & Marvanov, 2003	0	0.0769231	0	0	0	0	0	0	0	0	0	0
2066857	37989	family	Delonicicolaceae					0.214286	0	0	0	0	0	0	0	0	0	0	0
2126967	1217819	order	Symbiotaphrinales					0	0.0769231	0	0	0	0	0	0	0	0	0.0833333	0.5
3615	3524	family	Polygonaceae	buckwheat family			Polygonaceae Juss., 1789	0	0	0	0	1	0	0	0	0	0	0	0
5404	452283	order	Exobasidiales					0	0	0	0	0	0	0	0	0.0714286	0	0	0
6021	6020	subclass	Peritrichia		Peritricha;Peritrichida;Peritrichs			0	0	0	0	0	0	0	0	0	0	0	0
28997	452332	order	Dacrymycetales					0.142857	0	0	0	0	0	0	0.25	0	0	0.166667	0
33090	2759	kingdom	Viridiplantae	green plants	Chlorobionta;Chlorophyta/Embryophyta group;chlorophyte/embryophyte group		Chlorobionta Bremer, 1985;Viridiplantae Cavalier-Smith, 1981	0.857143	1	1	1	1	0.75	1	0.625	1	1	1	0.5
33392	33340	cohort	Holometabola		Endopterygota			0.0714286	0	0	0	0	0	0	0	0.0714286	0	0	0
37093	31277	no rank	Tetrahymenina					0	0	0	0	0	0	0	0	0.0714286	0	0	0
62907	1696033	class	Entorrhizomycetes		Entorrhizomycetidae			0.214286	0.0769231	0	0.5	0	0	0	0	0.0714286	0	0	0
68889	452333	order	Boletales					0	0.0769231	0	0	0	0	0	0.125	0.0714286	0	0	0
71275	1437201	subclass	rosids					0.0714286	0.153846	0.25	0	0.333333	0.75	0	0	0.142857	0	1	0.5
75966	3041	class	Trebouxiophyceae				Trebouxiophyceae Friedl, 1995	0.285714	0.0769231	0	0.5	0	0.25	1	0.5	0.214286	0	0	0
79272	451454	order	Monoblepharidales					0.142857	0	0	0	0	0	0	0	0	0	0	0
91827	71240	no rank	Gunneridae		core eudicots;core eudicotyledons		Gunneridae D.E.Soltis, P.S.Soltis & W.S.Judd, 2007	0.571429	0.153846	0.25	0	1	0.75	0	0	0.357143	0	1	0.5
91888	71274	no rank	lamiids		euasterids I			0.0714286	0	0	0	0	0.25	0	0	0.142857	0	0	0
112252	4751	no rank	Fungi incertae sedis					0.428571	0.153846	0	0.5	0.333333	0.25	0	0.125	0.357143	0	0.166667	0
147537	716545	subphylum	Saccharomycotina					0.214286	0.0769231	0	0	0	0	1	0	0.214286	0	0.166667	0.5
147551	147550	no rank	Sordariomycetes incertae sedis					0.142857	0.307692	0	0	0	0	0	0.125	0	0	0.166667	0
147555	451866	class	Taphrinomycetes					0.428571	0.307692	0	0.5	0	0.25	0	0.5	0.357143	0	0.333333	0
148099	451879	order	Mycocaliciales					0	0	0.25	0	0	0	0	0	0	0	0	0
162484	29000	class	Pucciniomycetes		Urediniomycetidae			0.142857	0.384615	0.5	0.5	0	0	0	0.375	0.428571	0	0.333333	0
188547	188550	superfamily	Cheyletoidea					0.0714286	0.0769231	0	0	0	0	0	0	0	0	0.0833333	0
204044	432003	order	Classiculales					0	0.0769231	0	0	0	0	0	0	0	0	0	0
219120	4210	subfamily	Cichorioideae				Cichorioideae (Juss.) Chevall., 1852	0.5	0	0	0	0	0	0	0	0	0	0	0
252199	222544	no rank	Sordariomycetidae incertae sedis					0.0714286	0	0	0	0	0	0	0	0	0	0	0
359160	4479	no rank	BOP clade					0	1	1	0.5	0	0	1	0	0.928571	1	0.0833333	0
431838	5878	subphylum	Intramacronucleata				Intramacronucleata Lynn, 1996	0	0.0769231	0	0	0	0	0	0	0.0714286	0	0	0
431958	431957	order	Wallemiales					0	0	0	0	0	0	0	0	0.0714286	0	0	0
432007	432005	order	Naohideales					0	0	0	0	0.333333	0	0	0.125	0	0	0	0
452335	155619	subclass	Phallomycetidae					0	0	0	0	0	0	0	0.125	0	0	0	0
642598	451435	order	Lobulomycetales					0.0714286	0	0	0	0	0	0	0	0	0	0	0
642610	451435	order	Rhizophlyctidales					0.214286	0	0	0	0	0	0	0	0	0	0	0
703495	159987	order	Microthyriales					0	0.0769231	0	0	0	0	0	0	0.214286	0	0	0
1137986	1913637	subphylum	Mortierellomycotina					0	0	0	0	0	0	0	0.125	0	0	0	0
1217819	716546	class	Xylonomycetes				Xylonomycetes R. Gazis & P. Chaverri 2012	0	0.0769231	0	0	0	0	0	0	0	0	0.0833333	0.5
1437197	4447	subclass	Petrosaviidae				Petrosaviidae S.W.Graham & W.S.Judd, 2007	0.571429	1	1	1	0.666667	0	1	0.375	0.928571	1	0.25	0.5
1538075	452284	class	Malasseziomycetes				Malasseziomycetes Boekhout, Q.M. Wang & F.Y. Bai, 2014	0.285714	0.384615	0.25	0.5	0.333333	0.25	1	0	0.357143	0	0.333333	1
1648037	147368	no rank	Poodae				Poodae L.Liou, 1980	0	0.923077	0.5	0.5	0	0	0	0	0.857143	1	0.0833333	0
1648038	147368	no rank	Triticodae				Triticodae T.D. Macfarl. & L.Watson, 1982	0	0	0.25	0	0	0	1	0	0	0	0	0
1798830	29000	class	Spiculogloeomycetes					0	0	0	0	0	0.25	0	0.125	0	0	0	0
1824641	159987	order	Strigulales					0.428571	0.307692	0.25	0.5	0	0	0	0.375	0.357143	0	0.416667	0
4210	4209	family	Asteraceae	daisy family	Compositae		Asteraceae Bercht. & J.Presl, 1820	0.5	0	0	0	0	0	0	0	0	0	0	0
4447	1437183	class	Liliopsida	monocots	Monocotyledoneae			0.571429	1	1	1	0.666667	0	1	0.375	0.928571	1	0.25	0.5
4479	38820	family	Poaceae	grass family	Bambusaceae;Gramineae		Bambusaceae Nakai, 1943;Poaceae Barnhart, 1895	0	1	1	0.5	0	0	1	0	0.928571	1	0.0833333	0
5878	33630	no rank	Ciliophora		Ciliata			0	0.0769231	0	0	0	0	0	0	0.0714286	0	0	0
6020	431838	class	Oligohymenophorea		Holotricha;Oligohymenophora;Oligohymenophorans		Oligohymenophorea de Puytoracetal.,1974	0	0	0	0	0	0	0	0	0.0714286	0	0	0
31277	6020	order	Hymenostomatida		Hymenostomata;Hymenostomes			0	0	0	0	0	0	0	0	0.0714286	0	0	0
33340	7496	infraclass	Neoptera					0.0714286	0	0	0	0	0	0	0	0.0714286	0	0	0
71240	1437183	no rank	eudicotyledons					0.571429	0.153846	0.25	0	1	0.75	0	0	0.357143	0	1	0.5
71274	1437201	subclass	asterids					0.5	0	0	0	0	0.25	0	0	0.142857	0	0	0
188550	83145	no rank	Raphignathae					0.0714286	0.0769231	0	0	0	0	0	0	0	0	0.0833333	0
431957	5302	class	Wallemiomycetes					0	0	0	0	0	0	0	0	0.0714286	0	0	0
432003	29000	class	Classiculomycetes					0	0.0769231	0	0	0	0	0	0	0	0	0	0
451454	4761	class	Monoblepharidomycetes					0.142857	0	0	0	0	0	0	0	0	0	0	0
451866	4890	subphylum	Taphrinomycotina					0.428571	0.307692	0	0.5	0	0.25	0	0.5	0.357143	0	0.333333	0
451879	147545	subclass	Mycocaliciomycetidae					0	0	0.25	0	0	0	0	0	0	0	0	0
452332	5302	class	Dacrymycetes					0.142857	0	0	0	0	0	0	0.25	0	0	0.166667	0
1696033	451864	phylum	Entorrhizomycota				Entorrhizomycota R. Bauer, Garnica, Oberw., K. Riess, M. Wei & Begerow, 2015	0.214286	0.0769231	0	0.5	0	0	0	0	0.0714286	0	0	0
1913637	112252	phylum	Mucoromycota					0	0	0	0	0	0	0	0.125	0	0	0	0
4209	91882	order	Asterales				Asterales Link, 1829	0.5	0	0	0	0	0	0	0	0	0	0	0
7496	85512	subclass	Pterygota					0.0714286	0	0	0	0	0	0	0	0.0714286	0	0	0
33630	2759	no rank	Alveolata					0	0.0769231	0	0	0	0	0	0	0.0714286	0	0	0
38820	4734	order	Poales					0	1	1	0.5	0	0	1	0	0.928571	1	0.0833333	0
83145	6947	infraorder	Eleutherengona		Eleutherengonides			0.0714286	0.0769231	0	0	0	0	0	0	0	0	0.0833333	0
1437183	3398	no rank	Mesangiospermae				Mesangiospermae M.J.Donoghue, J.A.Doyle & P.D.Cantino, 2007	0.785714	1	1	1	1	0.75	1	0.375	1	1	1	0.5
3398	58024	no rank	Magnoliophyta	angiosperms	Angiospermae			0.785714	1	1	1	1	0.75	1	0.375	1	1	1	0.5
4734	1437197	no rank	commelinids		Commelinidae;Commeliniflorae			0	1	1	0.5	0	0	1	0	0.928571	1	0.0833333	0
6947	83136	suborder	Prostigmata					0.0714286	0.0769231	0	0	0	0	0	0	0	0	0.0833333	0
85512	50557	no rank	Dicondylia					0.0714286	0	0	0	0	0	0	0	0.0714286	0	0	0
91882	71274	no rank	campanulids		euasterids II			0.5	0	0	0	0	0	0	0	0	0	0	0
50557	6960	class	Insecta					0.0714286	0	0	0	0	0	0	0	0.0714286	0	0	0
58024	78536	no rank	Spermatophyta	seed plants				0.785714	1	1	1	1	0.75	1	0.375	1	1	1	0.5
83136	6946	order	Trombidiformes					0.0714286	0.0769231	0	0	0	0	0	0	0	0	0.0833333	0
6946	6933	superorder	Acariformes					0.0714286	0.0769231	0	0	0	0	0	0	0	0	0.0833333	0
6960	197562	subphylum	Hexapoda					0.0714286	0	0	0	0	0	0	0	0.0714286	0	0	0
78536	58023	no rank	Euphyllophyta		euphyllophytes			0.785714	1	1	1	1	0.75	1	0.375	1	1	1	0.5
6933	6854	subclass	Acari		Acarina			0.0714286	0.0769231	0	0	0	0	0	0	0	0	0.0833333	0
58023	3193	no rank	Tracheophyta	vascular plants			Tracheophyta Sinnott ex Cavalier-Smith, 1998	0.785714	1	1	1	1	0.75	1	0.375	1	1	1	0.5
197562	197563	no rank	Pancrustacea					0.0714286	0	0	0	0	0	0	0	0.0714286	0	0	0
3193	131221	no rank	Embryophyta	higher plants;land plants;plants				0.785714	1	1	1	1	0.75	1	0.375	1	1	1	0.5
6854	6843	class	Arachnida					0.0714286	0.0769231	0	0	0	0	0	0	0	0	0.0833333	0
197563	6656	no rank	Mandibulata	mandibulates				0.0714286	0	0	0	0	0	0	0	0.0714286	0	0	0
6656	88770	phylum	Arthropoda					0.142857	0.0769231	0	0	0	0	0	0	0.0714286	0	0.0833333	0
6843	6656	subphylum	Chelicerata	chelicerates				0.0714286	0.0769231	0	0	0	0	0	0	0	0	0.0833333	0
131221	35493	subphylum	Streptophytina		Charophyta/Embryophyta group;charophyte/embryophyte group			0.785714	1	1	1	1	0.75	1	0.375	1	1	1	0.5
35493	33090	phylum	Streptophyta				Streptophyta Bremer, 1985	0.785714	1	1	1	1	0.75	1	0.375	1	1	1	0.5
88770	1206794	no rank	Panarthropoda					0.142857	0.0769231	0	0	0	0	0	0	0.0714286	0	0.0833333	0
1206794	33317	no rank	Ecdysozoa					0.142857	0.0769231	0	0	0	0	0	0	0.0714286	0	0.0833333	0
33317	33213	no rank	Protostomia					0.142857	0.0769231	0	0	0	0	0	0	0.0714286	0	0.0833333	0
33213	6072	no rank	Bilateria					0.142857	0.0769231	0	0	0	0	0	0	0.0714286	0	0.0833333	0
6072	33208	no rank	Eumetazoa					0.142857	0.0769231	0	0	0	0	0	0	0.0714286	0	0.0833333	0
33208	33154	kingdom	Metazoa	multicellular animals	Animalia			0.142857	0.0769231	0	0	0	0	0	0	0.0714286	0	0.0833333	0
-1								0	0	0	0	0	0	0	0	0.0714286	0	0	0

## Sheet: Host Family
taxid	parent_taxid	rank	scientific name	common name	synonym	anamorph	authority	Asteraceae	Boraginaceae	Brassicaceae	Geraniaceae	Oxalidaceae	Poaceae	Polygonaceae
1	1	no rank	root		all			1	1	1	1	1	1	1
2759	131567	superkingdom	Eukaryota	eukaryotes	Eucarya;Eucaryotae;Eukarya;Eukaryotae			1	1	1	1	1	1	1
3042	3166	order	Chlamydomonadales		Chlorococcales;Volvocales;Volvocida			0.181818	0.5	0	0	0	0.0882353	0
3052	3051	genus	Chlamydomonas					0	0	0	0	0	0.0882353	0
3542	3524	family	Aizoaceae	iceplant family			Aizoaceae Martinov, 1820	0	0	0	0	0	0.0294118	0
3618	1110386	genus	Rumex				Rumex L., 1753	0	0	0	0	0	0	1
3700	3699	family	Brassicaceae		Cruciferae		Brassicaceae Burnett, 1835	0.0454545	0	1	0	0	0.147059	0.333333
3705	981071	genus	Brassica				Brassica L., 1753	0.0454545	0	0.916667	0	0	0.0294118	0
3725	981071	genus	Raphanus				Raphanus L.	0	0	0.166667	0	0	0	0
4496	640623	genus	Avena				Avena L., 1753	0	0.5	0.0833333	0	0	0.411765	0
4501	147388	genus	Bromus				Anisantha K.Koch, 1848;Bromus L., 1753	0	0	0	0	0	0.176471	0
4512	1648017	genus	Hordeum	barleys			Hordeum L., 1753	0	0	0	0	0	0.0588235	0
4520	640630	genus	Lolium				Lolium L., 1753	0	0	0	0	1	0.352941	0
4751	33154	kingdom	Fungi					1	1	1	1	1	1	1
4815	34479	genus	Spizellomyces					0.0454545	0	0.0833333	0	0	0.0294118	0
4855	4854	genus	Mortierella					0.0454545	0	0	0	0	0	0
4890	451864	phylum	Ascomycota	sac fungi				1	1	1	0.75	1	1	1
4927	599737	species	Wickerhamomyces anomalus		Candida pelliculosa;Endomyces anomalus;Hansenula anomala;Pichia anomalus;Saccharomyces anomalus;Willia anomala		Saccharomyces anomalus E.C. Hansen, 1889;Wickerhamomyces anomalus (E.C. Hansen) Kurtzman, Robnett & Basehoar-Powers, 2008	0	0	0	0	0	0.0294118	0
4930	4893	genus	Saccharomyces		Pachytichospora			0.136364	0	0.0833333	0	0	0.0294118	0
4958	766764	genus	Debaryomyces		Wingea			0	0	0.166667	0	0	0.0294118	0
4970	1905116	genus	Bullera					0.136364	0	0	0	0	0.117647	0
4972	165440	species	Dioszegia hungarica		Bullera armeniaca;Cryptococcus hungaricus			0.272727	0	0.166667	0.25	0	0.352941	0
4988	1798865	genus	Bensingtonia					0.227273	0	0.416667	0	0	0.147059	0
4990	1798857	species	Pseudobensingtonia ingoldii		Bensingtonia ingoldii		Pseudobensingtonia ingoldii (Nakase & Itoh.) F.Y. Bai, Q.M. Wang, M. Groenew. & Boekhout, 2015	0	0	0	0.25	0	0.0588235	0
4998	1910893	genus	Kockovaella					0	0	0	0.25	0	0.0882353	0
5010	5009	genus	Taphrina		Lalaria			0	0	0	0	0	0.0294118	0
5014	451867	order	Dothideales					0.954545	1	1	0.5	1	1	1
5020	715340	family	Phaeosphaeriaceae					1	1	1	0.5	1	1	1
5021	34374	genus	Leptosphaeria					0.272727	0	0.333333	0.25	0	0.323529	0.333333
5022	220671	species	Leptosphaeria maculans	blackleg of canola fungus;blackleg of crucifers fungus	Leptosphaeria sp. JW-2011m	Phoma lingam		0.227273	0	0.166667	0	0	0.147059	0
5023	1111111	family	Venturiaceae					0.409091	0	0.166667	0.25	0	0.294118	0
5024	5023	genus	Venturia					0.363636	0	0.166667	0	0	0.176471	0
5027	28556	genus	Pyrenophora					0.409091	0.5	0.333333	0.5	0	0.558824	0
5032	62917	genus	Microstroma					0.0454545	0	0	0	0	0	0
5042	451871	order	Eurotiales		Elaphomycetales			0.181818	0	0.25	0	0	0.352941	0
5052	1131492	genus	Aspergillus		Petromyces			0.0909091	0	0.0833333	0	0	0.176471	0
5073	1131492	genus	Penicillium		Eupenicillium			0.136364	0	0.0833333	0	0	0.147059	0
5094	28568	genus	Talaromyces					0	0	0	0	0	0.0588235	0
5104	5103	genus	Ascosphaera					0.0454545	0	0	0	0	0	0
5112	34397	genus	Epichloe					0	0	0	0	1	0.0294118	0
5114	222544	order	Diaporthales					0.818182	1	0.833333	0.5	1	0.823529	1
5117	5114	family	Valsaceae					0.272727	1	0.25	0	1	0.529412	0.333333
5125	222543	order	Hypocreales					1	1	0.916667	0.5	1	1	1
5129	5125	family	Hypocreaceae		anamorphic Hypocreaceae			0.227273	0.5	0.166667	0	1	0.294118	0.333333
5139	222544	order	Sordariales					0.636364	1	0.75	0	1	0.529412	0.333333
5144	42302	genus	Podospora					0.0909091	0.5	0	0	0	0.0294118	0
5146	5148	genus	Sordaria					0	0	0	0	0	0.0294118	0
5148	5139	family	Sordariaceae					0.136364	0.5	0.25	0	1	0.176471	0
5149	35718	genus	Chaetomium					0.181818	0	0.166667	0	0	0.0294118	0
5178	147548	order	Helotiales		Leotiales			0.863636	1	0.666667	0.25	1	0.676471	0.666667
5181	5178	family	Helotiaceae					0.363636	0.5	0.5	0.25	0	0.411765	0.333333
5185	147549	order	Pezizales					0.590909	1	0.333333	0.25	1	0.323529	0.666667
5186	5185	family	Pezizaceae					0.5	1	0.25	0.25	1	0.323529	0.333333
5198	157822	family	Cladoniaceae					0	0	0	0	0	0.0294118	0
5204	451864	phylum	Basidiomycota					1	1	1	0.75	1	1	1
5206	1884633	genus	Cryptococcus		Filobasidiella			1	1	1	0.5	1	0.970588	1
5209	5408	genus	Filobasidium					1	1	1	0.5	1	1	1
5211	1851566	species	Piskurozyma capsuligena		Filobasidium capsuligenum;Leucosporidium capsuligenum		Filobasidium capsuligenum (Fell, Statzell, I.L. Hunter & Phaff) Rodr. Mir., 1972;Leucosporidium capsuligenum Fell, Statzell, I.L. Hunter & Phaff, 1969;Piskurozyma capsuligena (Fell, Statzell, I.L. Hunter & Phaff) A.M. Yurkov, 2016	0.0454545	0	0.0833333	0	0	0	0
5220	1890237	genus	Trimorphomyces					0.227273	0.5	0.583333	0	0	0.0588235	0
5230	5227	genus	Auricularia					0	0.5	0	0	0	0	0
5234	155616	order	Tremellales					1	1	1	0.75	1	0.970588	1
5238	5250	genus	Thanatephorus					0.0454545	0	0	0	0	0	0
5246	5245	genus	Septobasidium					0	0	0	0	0	0.0588235	0
5250	36064	family	Ceratobasidiaceae					0.227273	0	0.0833333	0.25	0	0.205882	0
5251	5250	genus	Ceratobasidium					0.0909091	0	0.0833333	0.25	0	0.147059	0
5268	5267	family	Ustilaginaceae					0.0909091	0	0	0	0	0.147059	0
5269	5268	genus	Ustilago					0.0909091	0	0	0	0	0.0294118	0
5277	1163720	genus	Leucosporidium		Leucosporidiella;Mastigobasidium			0.818182	0.5	0.25	0.75	0	0.441176	0.666667
5296	5262	genus	Puccinia					0.181818	0.5	0.333333	0	0	0.352941	0
5297	5296	species	Puccinia graminis					0.0454545	0	0.0833333	0	0	0.0588235	0
5302	5204	subphylum	Agaricomycotina					1	1	1	0.75	1	1	1
5303	355688	order	Polyporales		Aphyllophorales			0.318182	0	0.0833333	0	1	0.352941	0.333333
5304	452338	family	Corticiaceae					0.318182	1	0.5	0	1	0.323529	0.333333
5305	396331	genus	Phanerochaete					0.0909091	0	0	0	0	0	0
5307	81064	genus	Phlebia					0.0909091	0	0	0	0	0.0588235	0
5317	5303	family	Polyporaceae		Coriolaceae;Cryptoporaceae;Echinochaetaceae;Fomitaceae;Ganodermataceae;Grammotheleaceae;Haddowiaceae;Lentinaceae;Lentinaceae Julich, nom. inval.;Lophariaceae;Microporaceae;Pachykytosporaceae;Perenniporiaceae;Sparsitubaceae;Trametaceae			0	0	0	0	0	0.0588235	0.333333
5320	104366	genus	Pleurotus					0.0454545	0	0	0	0	0.0294118	0
5324	5317	genus	Trametes					0	0	0	0	0	0	0.333333
5338	452333	order	Agaricales		Agaricales anamorphs;Hymenogastrales;Lycoperdales;Nidulariales;Tulostomatales;anamorphic Agaricales			0.318182	0.5	0.5	0	0	0.5	0.333333
5340	5339	genus	Agaricus					0	0	0	0	0	0.0588235	0
5351	5338	family	Tricholomataceae					0.0454545	0	0.0833333	0	0	0.147059	0
5379	227336	genus	Suillus					0.0454545	0	0	0	0	0	0
5410	165808	genus	Cystofilobasidium					0.727273	1	0.833333	0.5	0	0.588235	0
5413	165790	genus	Erythrobasidium					0.454545	0	0.5	0.25	1	0.294118	0.333333
5414	5413	species	Erythrobasidium hasegawianum			Rhodotorula hasegawae		0.363636	0	0.416667	0.5	1	0.235294	0.333333
5418	189450	species	Papiliotrema laurentii		Cryptococcus laurentii;Torula laurentii;Torulopsis laurentii		Papiliotrema laurentii (Kuff.) X.Z. Liu, F.Y. Bai, M. Groenew. & Boekhout, 2016	0	0	0.0833333	0	0	0.0294118	0
5427	5426	genus	Lycoperdon					0	0	0.0833333	0	0	0.0294118	0
5429	1799696	genus	Sporobolomyces					0.454545	0.5	0.416667	0.25	1	0.352941	0
5434	1798808	species	Symmetrospora foliicola		Sporobolomyces foliicola		Symmetrospora foliicola (R.G. Shivas & Rodr. Mir.) Q.M. Wang, F.Y. Bai, M. Groenew. & Boekhout, 2015	0.136364	0.5	0.25	0.25	0	0.205882	0.333333
5436	1799786	species	Chrysozyma griseoflava		Sporobolomyces griseoflavus		Chrysozyma griseoflava (Nakase & M. Suzuki) Q.M. Wang, F.Y. Bai, M. Groenew. & Boekhout, 2015	0.181818	0	0.0833333	0	0	0.0882353	0
5455	681950	genus	Colletotrichum					0.636364	1	0.583333	0.25	1	0.617647	0.666667
5468	189359	genus	Robillarda					0	0	0.0833333	0	0	0	0
5498	452563	genus	Cladosporium					1	1	1	0.5	1	1	1
5502	28556	genus	Curvularia					0.227273	0.5	0.166667	0	1	0.147059	0
5506	110618	genus	Fusarium		Gibberella			0.909091	1	0.833333	0.5	1	0.676471	1
5531	1667166	genus	Myrothecium					0.909091	1	0.5	0.25	1	0.617647	0.666667
5533	1799696	genus	Rhodotorula		Rhodosporidium			0.818182	1	0.666667	0.5	1	0.735294	0
5537	5533	species	Rhodotorula mucilaginosa		Rhodotorula mucilaginosa var. mucilaginosa;Rhodotorula pilimanae;Rhodotorula rubra;Sporobolomyces albo-rubescens		Rhodotorula mucilaginosa (A. Jorg.) F.C. Harrison, 1928;Torula mucilaginosa A. Jorg., 1909	0	0	0	0	0	0.0588235	0
5538	221903	genus	Scytalidium					0.0454545	0	0	0	0	0	0
5543	5129	genus	Trichoderma		Aphysiostroma;Chromocrea;Creopus;Hypocrea;Pseudohypocrea;Sarawakus			0.136364	0.5	0.0833333	0	1	0.294118	0.333333
5569	603431	genus	Cenococcum					0.0454545	0	0	0	0	0.0294118	0
5579	1570301	genus	Aureobasidium					0.954545	1	1	0.5	1	1	1
5583	43219	genus	Exophiala		Nadsoniella;Wangiella			0.727273	1	0.416667	0	1	0.411765	0.333333
5587	43219	genus	Rhinocladiella					0.0454545	0	0	0	0	0.0588235	0
5598	28556	genus	Alternaria		Undifilum			1	1	1	0.5	1	1	1
5607	1910893	genus	Fellomyces					0	0	0	0.25	0	0	0
5615	48847	genus	Sterigmatomyces		Agaricostilbum			0.0454545	0	0	0	0	0	0
5909	5890	species	Tetrahymena rostrata				Tetrahymena rostrata Kahl, 1926	0	0	0	0	0	0.0294118	0
13201	1385565	genus	Phaeococcomyces					0.636364	1	0.583333	0.25	1	0.470588	0.333333
13289	5279	genus	Tilletia					0	0	0	0	0	0.0588235	0
13348	47021	genus	Arthrobotrys					0	0	0	0	0	0.0294118	0
15492	1648017	genus	Elymus				Elymus L., 1753	0	0	0	0	0	0.0588235	0
21555	4027	genus	Erodium				Erodium L'Her. ex Aiton	0	0	0	0.75	0	0.0294118	0
27311	27310	species	Cephaloascus fragrans					0	0	0	0	0	0	0
27312	29827	genus	Dipodascopsis					0	0	0	0	0	0.0294118	0
27331	27330	genus	Protomyces					0.454545	0.5	0.333333	0.25	0	0.264706	0
27332	27331	species	Protomyces inouyei					0.227273	0.5	0.25	0.25	0	0.176471	0
27344	5296	species	Puccinia coronata				Puccinia coronata Corda 1837	0.0454545	0	0.0833333	0	0	0.147059	0
28556	715340	family	Pleosporaceae		Pyrenophoraceae			1	1	1	0.5	1	1	1
28568	5042	family	Trichocomaceae		Eurotiaceae			0	0	0	0	0	0.0588235	0
28983	5178	family	Sclerotiniaceae					0.0909091	0	0	0	0	0	0
29000	5204	subphylum	Pucciniomycotina		Urediniomycetes			1	1	1	0.75	1	0.941176	1
29002	93133	genus	Cercospora					0.318182	0.5	0.333333	0.25	0	0.264706	0.333333
29820	5185	family	Sarcosomataceae					0	0	0	0	0	0	0.333333
29827	4892	family	Lipomycetaceae					0	0	0	0	0	0.0294118	0
29828	29827	genus	Lipomyces		Smithiozyma			0	0	0	0	0	0.0294118	0
33154	2759	no rank	Opisthokonta		Fungi/Metazoa group;opisthokonts		Opisthokonta Cavalier-Smith 1987	1	1	1	1	1	1	1
33183	451871	order	Onygenales		Gymnoascales			0.0454545	0	0	0	0	0	0.333333
33184	33183	family	Onygenaceae					0.0454545	0	0	0	0	0	0.333333
33194	28556	genus	Bipolaris					0.863636	0.5	1	0.25	1	1	1
33198	28556	genus	Drechslera					0.681818	0.5	0.416667	0.5	0	0.705882	0.666667
33202	1131624	genus	Paecilomyces					0	0	0.0833333	0	0	0	0
34373	34372	species	Blumeria graminis	grass mildew	Erysiphe graminis			0.0909091	0	0.25	0	0	0.117647	0
34374	715340	family	Leptosphaeriaceae		Leptosphaeriaceae anamorphs;anamorphic Leptosphaeriaceae			0.590909	1	0.916667	0.25	0	0.529412	0.666667
34379	221903	family	Pseudeurotiaceae					0.0909091	0	0	0	0	0.0588235	0
34395	451870	order	Chaetothyriales					0.954545	1	0.916667	0.5	1	0.764706	0.333333
34397	5125	family	Clavicipitaceae					0	0	0.0833333	0	1	0.0588235	0
34399	5117	genus	Phomopsis					0.0454545	0.5	0	0	0	0.0588235	0
34416	55071	genus	Microbotryum					0.0909091	0	0	0	0	0.0588235	0
34419	162483	genus	Colacogloea					0.0454545	0	0	0	0	0.0588235	0
34426	5226	family	Exidiaceae					0.0909091	0	0.0833333	0	0	0.0588235	0
34448	654128	genus	Marasmius					0	0.5	0	0	0	0.0588235	0
35718	5139	family	Chaetomiaceae					0.454545	0.5	0.583333	0	0	0.294118	0.333333
35724	45131	genus	Macrophomina					0.136364	0.5	0.0833333	0	0	0.0294118	0
36054	1798865	genus	Kondoa					0.181818	0	0.25	0	0	0.117647	0.333333
36064	355688	order	Cantharellales		Ceratobasidiales;Tulasnellales			0.318182	0.5	0.166667	0.25	0	0.264706	0
36649	5094	species	Talaromyces aculeatus		Penicillium aculeatum;Penicillium aculeatus		Penicillium aculeatum Raper & Fennell 1948;Talaromyces aculeatus (Raper & Fennell) Samson, Yilmaz, Frisvad & Seifert 2011	0	0	0	0	0	0.0294118	0
36913	1535325	genus	Lodderomyces					0	0	0	0	0	0.0294118	0
36919	29820	genus	Plectania					0	0	0	0	0	0	0.333333
36922	767018	genus	Diaporthe					0.5	0.5	0.416667	0.25	0	0.235294	0.333333
37234	1676655	genus	Spiromastix		Spiromastigoides		Spiromastigoides Doweld, 2013;Spiromastix Kuehn & G.F. Orr, 1962	0	0	0	0	0	0.0588235	0
37463	683158	genus	Phoma					0.636364	1	0.583333	0.5	1	0.647059	0.333333
37467	227329	genus	Pisolithus					0	0	0	0	0	0.0588235	0
37839	5014	no rank	unclassified Dothideales					0.590909	0.5	0.416667	0.25	1	0.676471	0.333333
37840	1812776	genus	Pestalotiopsis					0.136364	0.5	0.0833333	0	0	0.0882353	0
37884	100025	genus	Rhytidhysteron					0.181818	0	0	0	0	0.117647	0.333333
37937	744530	genus	Ramichloridium					0.0454545	0	0	0	0	0.0588235	0
37989	222545	order	Xylariales		Sphaeriales			0.954545	1	0.916667	0.5	1	0.941176	1
37990	37989	family	Xylariaceae		Sphaeriaceae			0.318182	0.5	0.166667	0	0	0.205882	0.333333
37991	37990	genus	Xylaria					0.136364	0.5	0	0	0	0.0588235	0
38074	388283	order	Ostropales					0.5	0	0.333333	0.25	0	0.382353	0.333333
38240	5204	no rank	unclassified Basidiomycota		unclassified Teliomycetes;unidentified Basidiomycota			0.227273	0.5	0.166667	0	0	0.235294	0
38452	110844	genus	Rutstroemia					0.181818	0.5	0.166667	0	1	0.0294118	0
38464	38462	species	Lambertella subrenispora					0.181818	0	0.25	0	0	0.0882353	0
38944	862241	genus	Flammulina					0.0454545	0	0	0	0	0	0
39180	5304	genus	Corticium					0.0454545	0	0	0	0	0	0
39291	5309	species	Athelia rolfsii		Corticium rolfsii	Sclerotium rolfsii	Athelia rolfsii (Curzi) C.C.Tu et Kimbr.;Corticium rolfsii Curzi	0.0454545	0	0	0	0	0	0
39679	39678	genus	Arthonia					0.0454545	0	0.166667	0	0	0.0588235	0
39702	93133	genus	Septoria					0.5	0.5	0.333333	0.25	0	0.235294	0.333333
39934	39933	genus	Lecanora					0	0	0	0	0	0.0294118	0
39937	1302181	family	Caliciaceae					0.181818	0	0.0833333	0	0	0.117647	0.333333
40219	2126968	genus	Symbiotaphrina		Tromeropsis			0	0	0.0833333	0	0	0.0588235	0
40415	1769247	genus	Antrodia					0	0	0.0833333	0	1	0.0294118	0
40427	1931355	genus	Ceriporia					0.0454545	0	0	0	0	0	0
40463	103393	genus	Peniophora					0	0	0	0	0	0.0588235	0
40593	5186	genus	Peziza					0	0	0	0	0	0.0588235	0
40609	5133	species	Nectria zonata					0	0	0	0	0	0.0588235	0
40654	40653	species	Wallrothiella subiculosa					0.0454545	0	0	0	0	0	0
40657	1033978	genus	Plectosphaerella			Plectosporium		0.409091	0.5	0.25	0	0	0.205882	0
40995	45676	family	Elsinoaceae					0.5	0	0.583333	0	1	0.5	0.333333
40996	40995	genus	Elsinoe					0.5	0	0.583333	0	1	0.5	0.333333
41247	2024004	genus	Mycena					0	0.5	0.0833333	0	0	0.0294118	0
41254	93133	genus	Mycosphaerella					0.181818	0	0.0833333	0	1	0.441176	0
42302	5139	family	Lasiosphaeriaceae					0.454545	1	0.333333	0	0	0.235294	0.333333
42303	42302	genus	Cercophora					0	0	0	0	0	0.0294118	0
42364	37989	family	Diatrypaceae					0.0454545	0	0	0	0	0.0294118	0
42658	1851551	genus	Udeniomyces					0.227273	0.5	0.25	0	0	0.294118	0
42660	42658	species	Udeniomyces puniceus		Bullera punicea;Candida punicea		Candida punicea Komag. & Nakase, 1965;Udeniomyces puniceus (Komag. & Nakase) Nakase & Takem., 1992	0.181818	0	0.25	0	0	0.117647	0
43083	5186	genus	Plicaria					0.136364	1	0.25	0	1	0.0588235	0.333333
43216	1572707	family	Tubeufiaceae					0.363636	0.5	0.0833333	0.5	0	0.352941	0
43217	43216	genus	Tubeufia					0.0454545	0	0	0	0	0.0588235	0
43219	34395	family	Herpotrichiellaceae					0.954545	1	0.75	0.5	1	0.735294	0.333333
43220	43219	genus	Capronia					0.0454545	0	0	0	0	0.0588235	0
44624	33159	genus	Helvella					0.0909091	0	0	0	0	0.0294118	0
44653	77634	genus	Tetracystis				Tetracystis R.M.Brown & Bold, 1964	0.0454545	0	0	0	0	0.0294118	0
45131	451869	family	Botryosphaeriaceae					0.545455	1	0.333333	0.5	1	0.411765	0
45132	45131	genus	Botryosphaeria					0.136364	0.5	0.0833333	0.5	0	0.0882353	0
45147	92860	family	Lophiostomataceae					0.954545	1	0.666667	0.25	0	0.764706	0.666667
45148	45147	genus	Lophiostoma					0.863636	1	0.5	0.25	0	0.676471	0.666667
45153	55176	genus	Westerdykella		Eremodothis			0.0454545	0	0	0	0	0.0294118	0
45307	92860	family	Melanommataceae					0.136364	0	0.0833333	0	0	0.0588235	0
45426	4890	no rank	unclassified Ascomycota		unidentified Ascomycota			0.318182	0.5	0.25	0.25	0	0.147059	0
45676	451867	order	Myriangiales					0.590909	0	0.666667	0.5	1	0.588235	0.333333
46452	46451	genus	Thelebolus					0.181818	0.5	0.25	0	0	0.235294	0
47021	189479	family	Orbiliaceae					0.681818	1	0.5	0.25	1	0.441176	0.333333
47022	47021	genus	Orbilia					0.545455	0.5	0.5	0.5	1	0.382353	0.333333
47167	47166	family	Rhytismataceae					0.545455	0.5	0.25	0.25	0	0.323529	0
47197	47196	species	Iodophanus carneus					0.409091	0.5	0.0833333	0	0	0.117647	0
47274	47021	genus	Dactylaria					0.272727	0.5	0	0.25	0	0.0294118	0
47743	5178	family	Hyaloscyphaceae					0.363636	0	0.0833333	0	0	0.147059	0
47744	47743	genus	Cistella					0.227273	0	0	0	0	0.0882353	0
47745	47744	species	Cistella grevillei					0.181818	0	0	0	0	0.0294118	0
47751	47743	genus	Arachnopeziza					0	0	0	0	0	0.0588235	0
47817	47743	genus	Lachnum					0	0	0.0833333	0	0	0	0
50045	42803	species	Spongiochloris spongiosa				Spongiochloris spongiosa (Vischer) R.C.Starr, 1955	0.136364	0.5	0	0	0	0.0588235	0
50375	1111112	genus	Fusicladium					0.136364	0	0	0.5	0	0.147059	0
50934	1302181	family	Physciaceae					0.0909091	0	0	0	0	0.0882353	0
50966	5351	genus	Clitocybe					0.0454545	0	0.0833333	0	0	0.0294118	0
54695	5178	no rank	unclassified Helotiales		unclassified Leotiales;unidentified Leotiales			0.181818	0	0	0	0	0.0294118	0
54788	290882	genus	Stagonospora		Saccharicola			0.0454545	0	0	0	1	0.0882353	0
54958	37989	family	Amphisphaeriaceae					0.409091	0	0.166667	0	0	0.235294	0
55067	5020	genus	Phaeosphaeria					0.545455	0.5	0.166667	0.25	1	0.470588	0.333333
55170	683158	genus	Didymella					0.272727	0	0.0833333	0	0	0.147059	0
55176	92860	family	Sporormiaceae					0.863636	1	0.583333	0.25	0	0.588235	0.333333
55178	265084	species	Preussia australis		Sporormiella australis		Sporormiella australis (Speg.) S.I.Ahmed & Cain	0.0454545	0	0	0	0	0	0
55193	742845	genus	Malassezia					0.181818	0.5	0.333333	0.25	0	0.411765	0.333333
56178	41954	genus	Limacella					0	0	0	0	0	0.0294118	0
56190	56189	genus	Podaxis					0.0454545	0	0	0	0	0	0
56757	38074	family	Stictidaceae					0.363636	0	0.0833333	0.25	0	0.294118	0.333333
57474	4970	species	Bullera unica					0.136364	0	0	0	0	0.0588235	0
57687	57692	genus	Fibulobasidium					0.0454545	0	0	0	0	0.0588235	0
57692	5234	family	Sirobasidiaceae					0.272727	0.5	0.25	0	0	0.235294	0.333333
58127	290882	genus	Helminthosporium					0.136364	0	0	0	0	0.0882353	0
60849	85904	genus	Vorticella					0	0	0	0	0	0	0
61459	1955842	species	Coniosporium apollinis					0	0	0.166667	0	0	0.0294118	0
62074	156300	genus	Sarcinomyces					0.181818	0	0	0	0	0.205882	0
62138	62133	genus	Scorias					0.318182	0.5	0	0.5	0	0.0882353	0.333333
62701	34371	genus	Podosphaera					0.181818	0.5	0.416667	0.25	0	0.0882353	0
63255	62911	genus	Entorrhiza					0.136364	0.5	0	0	0	0.0588235	0
63298	5268	genus	Pseudozyma					0	0	0	0	0	0.0882353	0
64357	47167	genus	Lophodermium					0.0454545	0	0	0	0	0.0882353	0
64482	64899	genus	Dothiora					0.454545	0	0.25	0	0	0.323529	0
64517	64515	species	Rhizophlyctis rosea		Karlingia rosea			0.136364	0	0	0	0	0	0
64899	5014	family	Dothioraceae		anamorphic Dothioraceae			0.727273	0	0.666667	0.25	0	0.676471	0
66005	147383	genus	Austrostipa				Austrostipa S.W.L.Jacobs & J.Everett	0	0	0	0	0	0.0588235	0
66029	147379	genus	Microlaena				Microlaena R.Br., 1810	0	0	0	0	0	0.0588235	0
66516	1484953	family	Phacidiaceae					0.363636	0.5	0.25	0.25	0	0.264706	0
66611	34395	family	Chaetothyriaceae					0.136364	0	0	0	0	0.0882353	0.333333
66739	45131	genus	Lasiodiplodia					0.0454545	0	0	0	0	0.0882353	0
67608	1682405	genus	Microdochium					0.363636	0.5	0.0833333	0	1	0.0882353	0
68764	68763	genus	Geastrum					0.0454545	0	0	0	0	0	0
68795	68793	species	Botryobasidium subcoronatum					0.0454545	0	0	0	0	0	0
68802	5304	genus	Hyphodontia					0.0909091	1	0.166667	0	0	0.0588235	0
68809	68808	genus	Typhula					0	0	0	0	0	0.0294118	0
71598	38074	family	Graphidaceae		Fissurinaceae;Thelotremataceae		Graphidaceae Dumort., 1822	0.363636	0	0.25	0.5	0	0.0588235	0
71779	57692	genus	Sirobasidium					0.272727	0.5	0.25	0	0	0.147059	0.333333
71780	71779	species	Sirobasidium magnum				Sirobasidium magnum Boedijn, 1934	0.0454545	0	0	0	0	0	0
71913	5351	genus	Resupinatus					0	0	0	0	0	0.0882353	0
71937	71934	genus	Entoloma					0.0454545	0	0.0833333	0	0	0	0
72117	5338	family	Omphalotaceae					0.0454545	0	0	0	0	0	0
72305	40111	genus	Dirina					0	0	0	0	0	0.0294118	0
72306	72305	species	Dirina catalinariae					0	0	0	0	0	0.0294118	0
73565	73564	species	Aporospora terricola					0	0	0	0	0	0.0294118	0
74721	1667166	genus	Stachybotrys					0	0	0	0	0	0.0294118	0
75749	75748	species	Glomerobolus gelineus					0.136364	0	0	0	0	0.147059	0.333333
76657	5178	family	Dermateaceae					0.0909091	0	0	0	0	0.0588235	0
76773	55193	species	Malassezia globosa					0.0454545	0	0	0	0	0	0
78060	157822	family	Parmeliaceae		Alectoriaceae;Anziaceae			0.181818	0	0.25	0	1	0.294118	0
78141	37240	genus	Oidiodendron					0.0909091	0	0	0	0	0	0
79807	292576	family	Coniochaetaceae					0.818182	1	0.666667	0	0	0.5	0.333333
79808	79807	genus	Coniochaeta		Lecythophora			0.818182	1	0.666667	0	0	0.441176	0.333333
80628	452334	family	Atheliaceae					0.0454545	0	0	0	0	0	0
81064	5303	family	Meruliaceae		Climacodontaceae;Phlebiaceae			0.0909091	0	0	0	0	0.117647	0
81065	1931355	genus	Gloeoporus					0.0909091	0	0	0	0	0.0294118	0
82105	43219	genus	Cladophialophora					0.409091	0.5	0.25	0.25	0	0.235294	0
82268	82267	species	Hyaloraphidium curvatum					0	0	0	0	0	0	0
84755	1804794	species	Kalmanozyma fusiformata		Candida fusiformata;Pseudozyma fusiformata		Kalmanozyma fusiformata (Buhagiar) Q.M. Wang, F.Y. Bai, Begerow & Boekhout, 2016	0	0	0	0	0	0.0294118	0
86830	5277	species	Leucosporidium fragarium		Candida fragaria;Leucosporidiella fragaria;Rhodotorula fragaria;Rhodotorula fragariae;Torulopsis fragaria;Torulopsis fragariae;Vanrija fragaria;Vanrijia fragaria		Leucosporidiella fragaria (J.A. Barnett & Buhagiar) J.P. Samp., 2003;Leucosporidium fragarium (J.A. Barnett and Buhagiar) V. de Garcia, M. A. Coelho, T. Maia, L. H. Rosa, A. M. Vaz, C. A. Rosa, J. P. Sampaio, P. Gonalves, M. R. van Broock and D. Libkind, 2015;Torulopsis fragariae J.A. Barnett & Buhagiar, 1971	0.0454545	0	0	0	0	0.0882353	0
88639	388283	order	Pertusariales					0.0909091	0	0	0	0	0	0
88646	1302176	family	Teloschistaceae					0.136364	0	0	0	0	0.0294118	0
88746	157821	family	Acarosporaceae					0.5	0.5	0.416667	0.25	0	0.470588	0.333333
88747	88746	genus	Acarospora					0.5	0.5	0.333333	0.25	0	0.441176	0.333333
89443	4751	no rank	unclassified Fungi					0.818182	1	0.833333	0.25	1	0.941176	0.333333
90676	5426	genus	Bovista					0	0	0	0	0	0.0294118	0
90886	155616	order	Filobasidiales					1	1	1	0.5	1	1	1
91806	1520784	genus	Trapelia					0.0454545	0	0.0833333	0	0	0	0
91984	106022	species	Sakaguchia lamellibrachiae		Rhodotorula lamellibrachiae		Sakaguchia lamellibrachiae (Nagah., Hamam., Nakase & Horikoshi) Q.M. Wang, F.Y. Bai, M. Groenew. & Boekhout, 2015	0.272727	0.5	0.0833333	0.5	0	0.264706	0
92860	451868	order	Pleosporales					1	1	1	0.5	1	1	1
92862	92860	no rank	unclassified Pleosporales					0.727273	1	0.666667	0.5	1	0.764706	1
92987	129384	genus	Phaeotheca					0.0454545	0	0	0	0	0.0588235	0
93133	134362	family	Mycosphaerellaceae					0.954545	1	0.666667	0.25	1	0.794118	0.333333
95331	34379	genus	Pseudeurotium					0.0454545	0	0	0	0	0.0294118	0
95729	28556	genus	Stemphylium					0.863636	1	1	0.5	1	1	1
97971	1898439	genus	Periconia					0.409091	0.5	0	0	1	0.176471	0
100025	191554	family	Hysteriaceae					0.181818	0.5	0.333333	0	0	0.205882	0.333333
100032	715298	genus	Keissleriella					0.727273	1	0.583333	0.25	1	0.529412	0.333333
100035	100034	species	Massariosphaeria phaeospora					0	0	0	0	0	0.0294118	0
101853	76657	genus	Pezicula					0.0454545	0	0	0	0	0.0294118	0
103376	452342	family	Stereaceae					0.0454545	0	0	0	0	0	0.333333
103886	261460	family	Chaetosphaeriaceae					0.863636	1	0.416667	0.25	1	0.529412	0.666667
103887	5125	family	Bionectriaceae		anamorphic Bionectriaceae			0.227273	0.5	0.166667	0	0	0.0882353	0
104247	452226	genus	Candelariella					0	0	0	0	0	0.0588235	0
104351	104350	genus	Crepidotus					0	0	0	0	0	0.0294118	0
104397	683158	genus	Epicoccum		Cerebella			0.636364	0.5	0.833333	0.25	0	0.705882	0.666667
105767	5215	genus	Tremella					0.863636	1	0.833333	0.25	1	0.823529	0.666667
105996	1611264	genus	Occultifur				Occultifur Oberw., 1990	0.0454545	0	0	0	0	0	0
106001	1798813	species	Buckleyzyma armeniaca		Rhodotorula armeniaca		Buckleyzyma armeniaca (R.G. Shivas & Rodr. Mir.) Q.M. Wang, F.Y. Bai, M. Groenew. & Boekhout, 2015	0.0909091	0	0	0	0	0.176471	0
106008	256806	species	Curvibasidium cygneicollum		Candida fujisanensis;Torulopsis fujisanensis;Vanrija fujisanensis		Curvibasidium cygneicollum J.P. Samp., 2004	0.5	1	0.5	0	0	0.441176	0
106010	1801565	species	Sampaiozyma ingeniosa		Candida ingeniosa;Rhodotorula ingeniosa;Torulopsis ingeniosa;Vanrija ingeniosa;Vanrijia ingeniosa		Rhodotorula ingeniosa (Di Menna) Arx & Weijman, 1979;Sampaiozyma ingeniosa (Di Menna) Q.M. Wang, F.Y. Bai, M. Groenew. & Boekhout, 2015;Torulopsis ingeniosa Di Menna, 1958	0.863636	1	0.916667	1	0	0.5	0.333333
106019	1803523	species	Yunzhangia sonckii		Candida sonckii;Rhodotorula sonckii;Vanrija sonckii;Vanrijia sonckii		Candida sonckii Hopsu-Havu, Tunnela & Yarrow, 1978;Rhodotorula sonckii (Hopsu-Havu, Tunnela & Yarrow) Rodr. Mir. & Weijman, 1988;Yunzhangia sonckii (Hopsu-Havu, Tunnela & Yarrow) Q.M. Wang, F.Y. Bai, M. Groenew. & Boekhout, 2015	0.454545	0	0.166667	0.5	0	0.0882353	0
106022	460509	genus	Sakaguchia					0.363636	0.5	0.0833333	0.5	0	0.352941	0
106023	106022	species	Sakaguchia dacryoidea		Rhodosporidium dacryoideum;Rhodosporidium dacryoidum		Sakaguchia dacryoidea (Fell, I.L. Hunter & Tallman) Y. Yamada, K. Maeda & Mikata, 1994	0.0909091	0	0	0.25	0	0.0588235	0
106263	37989	family	Apiosporaceae					0.136364	0	0	0	0	0	0
106814	4496	species	Avena macrostachya				Avena macrostachya Balansa ex Coss. & Durieu	0	0	0	0	0	0.0588235	0
109764	109763	species	Harpochytrium sp. JEL94					0.0909091	0	0	0	0	0	0
109893	1134080	genus	Powellomyces					0	0	0	0	0	0.0588235	0
110564	103887	genus	Clonostachys					0	0.5	0	0	0	0.0294118	0
110586	29865	species	Nectriopsis violacea					0.181818	0.5	0.166667	0	0	0.0294118	0
110618	5125	family	Nectriaceae					0.909091	1	0.833333	0.5	1	0.735294	1
110844	5178	family	Rutstroemiaceae					0.454545	0.5	0.333333	0.25	1	0.176471	0.333333
111621	78060	genus	Xanthoparmelia		Chondropsis;Neofuscelia;Paraparmelia			0	0	0.166667	0	0	0.0294118	0
112072	112071	species	Naohidea sebacea		Dacrymyces sebaceus		Dacrymyces sebaceus Berk. & Broome, 1871;Naohidea sebacea (Berk. & Broome) Oberw., 1990	0.0454545	0	0	0	0	0	0.333333
112133	5181	genus	Crocicreas		Cyathicula			0	0	0.166667	0	0	0.0588235	0
112488	744530	genus	Dissoconium					0	0.5	0	0	0	0.117647	0
112497	93133	genus	Ramularia					0.272727	0	0	0	1	0.147059	0
114230	152648	genus	Nigrospora					0.136364	0	0.166667	0	0	0.117647	0
115234	110618	genus	Cosmospora					0	0	0	0	0	0.0588235	0
116791	111584	species	Buellia disciformis					0	0	0	0	0	0.0294118	0
116799	50934	genus	Phaeophyscia				Phaeophyscia Moberg, 1977	0	0	0	0	0	0.0588235	0
117058	71934	genus	Rhodocybe					0.0454545	0	0	0	0	0	0
117544	5117	genus	Cytospora					0.227273	0.5	0.25	0	1	0.529412	0.333333
117816	34479	genus	Kochiomyces					0	0	0	0	0	0.0294118	0
117818	4815	species	Spizellomyces dolichospermus					0.0454545	0	0.0833333	0	0	0	0
118273	1406929	genus	Lecophagus					0	0	0.0833333	0	0	0	0
121621	1424649	genus	Phyllosticta					0.0909091	0	0.0833333	0	0	0.0588235	0
124095	39941	species	Mycocalicium victoriae					0	0	0	0	0	0.0294118	0
125369	221678	genus	Paraphaeosphaeria					0.0454545	0	0.0833333	0.25	0	0	0
131324	93133	genus	Pseudocercospora					0.0454545	0	0.0833333	0	0	0	0
131338	37990	genus	Anthostomella					0.0909091	0	0.0833333	0	0	0	0.333333
132098	33198	species	Drechslera campanulata					0.5	0.5	0.166667	0.5	0	0.294118	0.666667
134362	451867	order	Capnodiales					1	1	1	0.5	1	1	1
134502	1769459	genus	Chaetomella					0.0454545	0	0	0	0	0	0
136167	46635	species	Hormonema sp. F-054,258					0.5	0	0.5	0.25	0	0.5	0
136422	5263	species	Uromyces striatus					0.0454545	0	0	0	0	0	0
138063	1812776	genus	Seiridium					0.0454545	0	0.0833333	0	0	0.0294118	0
139131	5304	genus	Sistotrema					0	0	0.0833333	0	0	0.0294118	0
139133	1229510	genus	Sistotremastrum					0.0454545	0	0.0833333	0	0	0	0
139134	139133	species	Sistotremastrum niveocremeum					0.0454545	0	0	0	0	0	0
139159	1931355	genus	Byssomerulius					0	0	0	0	0	0.0294118	0
139171	139141	species	Tubulicrinis sp. GEL5046					0	0	0	0	0	0.0882353	0
139231	33198	species	Drechslera nobleae					0.0454545	0	0	0	0	0.176471	0
143937	76657	genus	Neofabraea					0.0454545	0	0	0	0	0	0
146292	146291	family	Verrucariaceae		Mastodiaceae		Mastodiaceae Zahlbr. 1907;Verrucaria Schrad., 1794	0.0909091	0	0.25	0	0	0.0882353	0
147498	92860	no rank	Pleosporales incertae sedis					0.818182	1	0.666667	0.5	0	0.647059	0.666667
147538	716545	subphylum	Pezizomycotina		Euascomycota			1	1	1	0.5	1	1	1
147539	715962	class	Arthoniomycetes					0.772727	1	0.833333	0.25	1	0.647059	0.333333
147541	715962	class	Dothideomycetes					1	1	1	0.5	1	1	1
147545	716546	class	Eurotiomycetes					0.954545	1	1	0.5	1	0.794118	0.333333
147547	716546	class	Lecanoromycetes					0.727273	0.5	0.75	0.5	1	0.823529	1
147548	715989	class	Leotiomycetes					0.909091	1	0.75	0.5	1	0.882353	0.666667
147550	715989	class	Sordariomycetes					1	1	1	0.5	1	1	1
150498	147550	no rank	unclassified Sordariomycetes					0.636364	0	0.0833333	0	0	0.176471	0.333333
152622	37990	genus	Muscodor					0	0	0	0	0	0.0294118	0
154566	1344078	genus	Marchandiomyces					0.136364	0	0	0	0	0.0588235	0
155415	110158	genus	Monosporascus					0.0454545	0	0	0	0	0.0294118	0
155416	155415	species	Monosporascus cannonballus					0	0	0	0	0	0.0294118	0
155616	5302	class	Tremellomycetes		Heterobasidiomycetes			1	1	1	0.75	1	1	1
155619	5302	class	Agaricomycetes					0.727273	1	0.833333	0.25	1	0.794118	0.666667
156596	1229510	genus	Trechispora					0.0454545	0	0	0	0	0.0294118	0
157253	157252	species	Muribasidiospora indica					0	0	0	0	0	0.0294118	0
158045	1618111	genus	Phaeomoniella					0.363636	0.5	0.166667	0	1	0.411765	0
159075	162454	genus	Acremonium					0.181818	0.5	0.0833333	0	0	0.0588235	0.333333
159638	147548	no rank	unclassified Leotiomycetes					0.318182	0	0.166667	0.25	0	0.117647	0
159639	5178	no rank	Helotiales incertae sedis					0.227273	0	0	0	0	0	0
159987	147541	no rank	Dothideomycetes incertae sedis					0.863636	1	0.833333	0.5	1	0.823529	0.333333
160893	160892	species	Ceratosebacina calospora					0	0	0	0	0	0.0294118	0
162405	1910953	genus	Bartalinia					0.0454545	0	0.0833333	0	0	0.0294118	0
162418	54958	genus	Seimatosporium					0.409091	0	0.0833333	0	0	0.235294	0
162454	5125	no rank	Hypocreales incertae sedis					0.5	1	0.25	0	0	0.382353	0.333333
162475	452283	order	Microstromatales					0.181818	0	0	0	0	0.147059	0
162477	162475	no rank	Microstromatales incertae sedis					0.136364	0	0	0	0	0.0294118	0
162481	29000	class	Microbotryomycetes		Microbotryomycetidae			0.954545	1	1	0.75	1	0.941176	1
163257	45147	genus	Vaginatispora					0.136364	0.5	0	0	0	0.0882353	0.333333
164535	129384	genus	Tetracladium					0.909091	1	0.833333	0.5	0	0.558824	0.666667
165440	1884640	genus	Dioszegia					0.954545	1	0.916667	0.25	1	0.823529	1
165790	432006	family	Erythrobasidiaceae				Erythrobasidiaceae Denchev 2009	0.5	0	0.5	0.25	1	0.352941	0.333333
171627	5506	no rank	Fusarium fujikuroi species complex		Gibberella fujikuroi complex			0	0	0	0	0	0	0
172190	1535530	genus	Coniella		Pilidiella			0.227273	0	0.166667	0.5	0	0.176471	0.333333
172618	78060	genus	Hypotrachyna					0.0454545	0	0.0833333	0	1	0.0588235	0
173137	40593	species	Peziza michelii					0	0	0	0	0	0.0588235	0
173150	5186	genus	Ruhlandiella					0.0454545	0	0	0.25	0	0.0882353	0
175500	66029	species	Microlaena avenacea		Ehrharta diplax		Ehrharta diplax F.Muell.;Microlaena avenacea (Raoul) Hook.f.	0	0	0	0	0	0.0588235	0
175855	40424	genus	Fuscoporia					0	0	0	0	0	0.0294118	0
176137	5186	no rank	unclassified Pezizaceae		unclassified Terfeziaceae			0.0454545	0	0	0	0	0	0
177194	221903	genus	Hyphozyma					0	0	0.0833333	0	0	0	0
178737	37990	genus	Arthroxylaria					0	0	0	0	0	0.0294118	0
181926	5320	species	Pleurotus australis					0	0	0	0	0	0.0294118	0
184430	184208	genus	Coprinellus					0.136364	0	0.166667	0	0	0.117647	0
184431	184208	genus	Coprinopsis					0	0	0.0833333	0	0	0.0294118	0.333333
187248	1171044	genus	Harknessia					0.454545	0	0.5	0.25	1	0.235294	0
188545	188544	species	Demodex canis				Demodex canis Leydig, 1859	0.0454545	0	0.0833333	0	0	0.0294118	0
189359	37989	no rank	Xylariales incertae sedis					0.863636	1	0.916667	0.25	1	0.852941	0.666667
189450	1581159	genus	Papiliotrema					0.909091	1	0.833333	0.5	1	0.5	0.666667
190626	5296	species	Puccinia malvacearum					0	0	0.0833333	0	0	0	0
195053	103376	genus	Megalocystidium					0	0	0	0	0	0	0.333333
195797	195796	species	Ramalea cochleata					0	0	0	0	0	0.0294118	0
203525	34418	genus	Cystobasidium					0.5	0.5	0.416667	0	0	0.264706	0.333333
209472	209470	species	uncultured Pleosporales		uncultured ectomycorrhiza (Pleosporales)			0	0	0	0	0	0.0294118	0
209473	147541	no rank	unclassified Dothideomycetes					0.636364	0	0.333333	0.25	0	0.441176	0
218105	399129	no rank	Cryphonectria-Endothia species complex					0.0454545	0	0	0	0	0	0
218126	426519	genus	Quambalaria					0.0454545	0	0	0	0	0.117647	0
220344	5206	species	Cryptococcus sp. Pro94-Y57					0.181818	0	0.166667	0	1	0.117647	0
220671	5021	no rank	Leptosphaeria maculans species complex					0.272727	0	0.25	0.25	0	0.176471	0
220672	220671	species	Leptosphaeria biglobosa					0.0454545	0	0.0833333	0.5	0	0.0588235	0
221670	715340	family	Cucurbitariaceae					0.318182	0	0.333333	0	0	0.294118	0
221678	1255046	family	Didymosphaeriaceae		Montagnulaceae			1	1	0.916667	0.5	1	0.911765	0.666667
221900	47166	family	Cudoniaceae					0	0	0.0833333	0	0	0	0
221903	147548	no rank	Leotiomycetes incertae sedis					0.227273	0	0.0833333	0	0	0.0588235	0
222543	147550	subclass	Hypocreomycetidae					1	1	0.916667	0.5	1	1	1
222544	147550	subclass	Sordariomycetidae					1	1	1	0.5	1	0.911765	1
223428	1520784	genus	Xylographa					0.0454545	0	0	0	0	0	0
223899	5181	genus	Tricladium					0.0454545	0.5	0	0	0	0.0294118	0
224419	147498	genus	Shiraia					0.0454545	0.5	0	0	0	0.0294118	0
226117	5531	species	Myrothecium gramineum		Xepiculopsis graminea			0.0454545	0	0.0833333	0	0	0.0588235	0
226122	5531	species	Myrothecium lachastrae					0	0.5	0.0833333	0	0	0.0294118	0
226991	1341112	genus	Cyphellophora					0.181818	0	0.166667	0	1	0.0882353	0.333333
227067	221678	genus	Spegazzinia					0.227273	0.5	0.0833333	0	1	0.205882	0.333333
228211	5020	genus	Phaeosphaeriopsis					0.0909091	0	0.0833333	0	0	0.0588235	0
228943	228942	species	Limonomyces roseipellis					0	0.5	0.0833333	0	1	0.0882353	0.333333
228944	228942	species	Limonomyces culmigenus					0.272727	0	0.25	0	0	0.147059	0
231212	162481	order	Leucosporidiales					0.818182	0.5	0.25	0.75	0	0.441176	0.666667
231213	162481	order	Sporidiobolales		Sporidiaceae			0.818182	1	0.75	0.75	1	0.823529	0
232773	56757	genus	Absconditella					0.0454545	0	0	0	0	0	0
237031	78060	genus	Canoparmelia					0.0454545	0	0	0	0	0	0
237584	668547	genus	Teratosphaeria					0.409091	1	0.333333	0	0	0.588235	0.333333
237593	470130	species	Catenulostroma elginense		Trimmatostroma elginense			0.0454545	0	0	0	0	0.0294118	0
243023	34397	genus	Pochonia					0	0	0	0	0	0.0294118	0
245174	148959	species	Wallemia ichthyophaga		Wallemia ichthiophaga		Wallemia ichthyophaga Johan-Olsen	0	0	0	0	0	0.0294118	0
248099	248098	species	Asterothyrium longisporum					0.318182	0	0.25	0.5	0	0.0588235	0
252155	42302	genus	Schizothecium					0.318182	0.5	0.166667	0	0	0.176471	0.333333
252690	109893	species	Powellomyces sp. EA					0	0	0	0	0	0.0294118	0
255703	203525	species	Cystobasidium lysinophilum		Rhodotorula lysiniphila;Rhodotorula lysinophila		Cystobasidium lysinophilum (Nagahama, Hamamoto, Nakase & Horikoshi) Yurkov, Kachalkin, Daniel, Groenewald, Libkind, de Garcia, Zalar, Gouliamova, Boekhout & Begerow, 2014	0.0909091	0	0	0	0	0.0294118	0
256806	162483	genus	Curvibasidium					0.5	1	0.5	0	0	0.441176	0
257870	1890244	species	Saitozyma paraflava		Cryptococcus paraflavus;Saitozyma paraflavus		Cryptococcus paraflavus Golubev & Sampaio	0.318182	0.5	0.333333	0	0	0.0588235	0
259858	746524	genus	Arctotheca				Arctotheca J.C.Wendl.	0.318182	0	0	0	0	0	0
261096	451453	genus	Kappamyces					0.0454545	0	0	0	0	0.117647	0
265084	718227	genus	Preussia				Preussia Fuckel, 1867	0.590909	1	0.333333	0	0	0.470588	0.333333
266071	1769459	genus	Pilidium					0.0909091	0	0.0833333	0	0	0.117647	0
267215	1909749	species	Genolevuria amylolytica		Cryptococcus amylolyticus		Cryptococcus amylolyticus A. Fonseca, J. Inacio & Spenc.-Mart., 2005;Genolevuria amylolytica (A. Fonseca, J. Inacio & Spenc.-Mart.) X.Z. Liu, F.Y. Bai, M. Groenew. & Boekhout, 2016	0.181818	0.5	0.0833333	0	0	0.0588235	0.333333
267217	1909749	species	Genolevuria armeniaca		Cryptococcus armeniacus		Genolevuria armeniaca (A. Fonseca & J. Inacio) X.Z. Liu, F.Y. Bai, M. Groenew. & Boekhout, 2015	0.454545	0	0.25	0.25	0	0.294118	0
268179	1851470	genus	Cryptotrichosporon					0.181818	0	0.0833333	0.25	1	0.205882	0
268180	268179	species	Cryptotrichosporon anacardii					0.0909091	0	0.0833333	0.25	1	0.176471	0
269607	237584	species	Teratosphaeria mexicana		Mycosphaerella mexicana			0.0909091	0	0.0833333	0	0	0.0588235	0
271836	271835	species	Acarosporina microspora		Schizoxylon microsporum		Schizoxylon microsporum R.W. Davidson & R.C.Lorenz	0	0	0	0	0	0.0294118	0
271885	154566	species	Marchandiomyces lignicola					0.0909091	0	0	0	0	0.0294118	0
276832	45131	genus	Dothiorella					0	0	0	0	0	0.0294118	0
278090	147544	genus	Teichospora		Floricola;Misturatosphaeria;Ramusculicola			0.272727	0	0.0833333	0	0	0.352941	0
281250	134362	family	Schizothyriaceae					0.0454545	0	0	0	0	0	0
281846	118273	species	Lecophagus sp. ATCC 56071					0	0	0.0833333	0	0	0	0
284134	162454	genus	Sarocladium					0	0	0.166667	0	0	0.0588235	0
285719	13786	no rank	unclassified Trebouxia		unclassified Trebouxia photobionts			0.363636	0.5	0	0.25	0	0.147059	0
285810	221670	genus	Pyrenochaeta					0.136364	0	0.0833333	0	0	0.117647	0
286399	88746	genus	Polysporina					0	0	0	0	0	0.0294118	0
286400	286399	species	Polysporina simplex					0	0	0	0	0	0.0294118	0
286401	88746	genus	Sarcogyne					0	0	0.0833333	0	0	0.0294118	0
286661	286660	species	Peltaster fructicola					0.0454545	0	0	0	0	0.0294118	0
290882	1255046	family	Massarinaceae					0.5	1	0.333333	0.25	1	0.323529	0
291227	152655	genus	Appendicheirospora					0	0	0.0833333	0	0	0	0
291228	291227	species	Appendicheirospora graminicola					0	0	0.0833333	0	0	0	0
291363	474943	genus	Lecanicillium					0.0454545	0	0	0	0	0	0
292188	292187	species	Carestiella socia					0.0909091	0	0.0833333	0	0	0.0588235	0
292576	222544	order	Coniochaetales					0.818182	1	0.666667	0	0	0.5	0.333333
296781	28983	genus	Torrendiella					0.0454545	0	0	0	0	0	0
296783	54683	species	Lanzia allantospora					0.0454545	0	0	0	0	0.0588235	0.333333
297313	355688	order	Sebacinales					0.0909091	0	0.0833333	0	0	0.0294118	0
306876	93133	genus	Readeriella					0.181818	0	0.166667	0	0	0.205882	0
307341	89443	species	fungal sp. TRN254					0.0454545	0	0	0	0	0.205882	0
307351	89443	species	fungal sp. TRN270					0.0454545	0	0	0	0	0	0
307369	89443	species	fungal sp. TRN436					0	0.5	0	0	0	0.0294118	0
307370	1664131	species	Ramimonilia apicalis				Ramimonilia apicalis Stielow & Quaedvlieg, 2015	0.0909091	0	0.0833333	0	0	0.0588235	0.333333
307390	89443	species	fungal sp. TRN458					0.0454545	0	0	0	0	0.0294118	0
312146	1851509	species	Naganishia randhawae		Cryptococcus randhawai;Cryptococcus randhawii		Cryptococcus randhawai Z.U. Khan, Suh. Ahmad, F. Hagen, Fell, Kowshik, Chandy & Boekhout, 2010;Naganishia randhawae (Z.U. Khan, S.O. Suh. Ahmad, F. Hagen, Fell, Kowshik, Chandy & Boekhout) X.Z. Liu, F.Y. Bai, M. Groenew. & Boekhout,	0.227273	0.5	0.333333	0	0	0.0882353	0
314120	1406929	genus	Vermispora					0	0	0	0	0	0.0294118	0
314149	43216	genus	Acanthostigma					0	0	0	0	0	0.0882353	0
316340	34395	no rank	unclassified Chaetothyriales					0.454545	0.5	0.5	0	1	0.352941	0
318751	45153	species	Westerdykella ornata					0	0	0	0	0	0.0294118	0
318860	715298	genus	Pleurophoma					0.272727	0.5	0	0	0	0.147059	0
325665	45153	species	Westerdykella nigra					0.0454545	0	0	0	0	0	0
329018	81065	species	Gloeoporus dichrous					0.0454545	0	0	0	0	0	0
332221	332217	species	Neochlorosarcina negevensis		Chlorosarcinopsis negevensis		Chlorosarcinopsis negevensis I.Friedmann & R.Ocampo-Paus;Neochlorosarcina negevensis (I.Friedmann & R.Ocampo-Paus) S.Watanabe, 1983	0.136364	0.5	0	0	0	0.0588235	0
333827	333826	species	Diptera environmental sample					0.0454545	0	0	0	0	0.0294118	0
336780	110846	genus	Pseudombrophila		Fimaria			0.0454545	0	0	0	0	0	0
337359	21555	species	Erodium carolinianum				Erodium carolinianum Aldasoro, C.Navarro, P.Vargas, L.Saez & Aedo	0	0	0	0	0	0.0294118	0
344958	43219	genus	Cladoriella					0	0	0	0	0	0.117647	0
344959	344958	species	Cladoriella eucalypti					0	0	0	0	0	0.0882353	0
355688	155619	no rank	Agaricomycetes incertae sedis					0.727273	1	0.666667	0.25	1	0.705882	0.666667
356988	5020	genus	Sclerostagonospora					0.0454545	0	0	0	0	0.0294118	0
361670	361669	species	Hemiflagellochloris kazakhstanica					0	0	0	0	0	0.0294118	0
364733	364710	species	Endocarpon pusillum					0.0454545	0	0.0833333	0	0	0.0588235	0
365329	1909748	species	Fonsecazyma mujuensis		Cryptococcus mujuensis		Cryptococcus mujuensis K.S. Shin & Y.H. Park 2006;Fonsecazyma mujuensis (K.S. Shin & Y.H. Park) X.Z. Liu, F.Y. Bai, M. Groenew. & Boekhout, 2015	0.136364	0	0.0833333	0	1	0.0588235	0
366620	89802	species	Hyphoderma orphanellum					0.0454545	0	0	0	0	0.0294118	0
366629	68802	species	Hyphodontia subalutacea		Hyphodontia sp. 1 LR-2015			0	0	0	0	0	0.0294118	0
371108	1450292	genus	Saccharata				Saccharata Denman & Crous	0.227273	0	0.5	0	0	0.264706	0
371113	45131	genus	Tiarosporella					0.0909091	0	0.0833333	0	1	0.0588235	0
371114	371113	species	Tiarosporella graminis				Tiarosporella graminis (Piroz. & Shoemaker) Nag Raj	0.0909091	0	0	0	1	0.0294118	0
385117	89443	species	fungal endophyte sp. SS-1353					0.0909091	0.5	0	0	0	0.117647	0
388283	1520881	subclass	Ostropomycetidae					0.545455	0	0.333333	0.25	0	0.382353	0.333333
388435	1520881	subclass	Lecanoromycetidae					0.5	0	0.416667	0.25	1	0.411765	0.333333
391237	5304	genus	Peniophorella					0.0454545	0	0.166667	0	0	0.0294118	0
394858	1909749	species	Genolevuria bromeliarum		Cryptococcus bromeliarum		Cryptococcus bromeliarum M. F. Landell & P. Valente 2009;Genolevuria bromeliarum (Landell & P. Valente) X.Z. Liu, F.Y. Bai, M. Groenew. & Boekhout, 2016	0.0909091	0	0.0833333	0	0	0	0
396331	5303	family	Phanerochaetaceae		Bjerkanderaceae;Hapalopilaceae			0.0909091	0	0	0	0	0.117647	0
404203	89443	species	soil fungal sp. ANG34					0.0454545	0	0	0	0	0	0
405928	5186	genus	Hydnobolites					0.0909091	0	0	0	0	0	0
406764	47218	species	Saccobolus dilutellus					0.0909091	0	0.0833333	0	0	0	0
407088	407949	species	Fusculina eucalypti				Fusculina eucalypti Crous & Summerell, 2009	0.181818	0	0.0833333	0.25	0	0.147059	0
407092	407091	species	Plectosphaera eucalypti		Phyllachora eucalypti		Phyllachora eucalypti (Speg.) Petr.;Plectosphaera eucalypti (Cooke & Massee) H.J.Swart	0.727273	1	0.833333	0.5	1	0.823529	0.333333
407951	45131	genus	Neofusicoccum					0.0909091	0	0	0	0	0.0588235	0
407953	189359	genus	Phlogicylindrium					0.0454545	0	0	0	0	0	0
408669	470111	species	Sympoventuria capensis					0	0	0	0	0	0.0294118	0
410823	89443	species	fungal endophyte		Fungal endophyte sp1			0.136364	0.5	0	0	0	0.0294118	0
411563	36064	genus	Minimedusa					0.136364	0.5	0.0833333	0	0	0	0
411704	154566	species	Marchandiomyces buckii					0.0454545	0	0	0	0	0	0
412498	139971	species	Menispora sp. EXP0529F					0	0	0	0	0	0.0294118	0
414539	5583	species	Exophiala crusticola					0.0909091	0	0	0	0	0	0
422685	221678	no rank	unclassified Didymosphaeriaceae					0.0454545	0	0	0	0	0.0882353	0
424532	5206	species	Cryptococcus sp. FYB-2007a					0.0454545	0	0.166667	0	0	0.0588235	0
425286	45426	species	ascomycete sp. CH-Aa18					0.0454545	0	0	0	0	0	0
430999	1233474	genus	Knufia					0.590909	1	0.333333	0	1	0.294118	0.333333
431023	205932	genus	Phacidiella					0	0	0.0833333	0	0	0.0294118	0
431030	431023	species	Phacidiella eucalypti					0	0	0.0833333	0	0	0	0
432005	29000	class	Cystobasidiomycetes					0.818182	0.5	0.916667	0.5	1	0.705882	1
432006	432005	order	Erythrobasidiales					0.545455	0	0.583333	0.25	1	0.352941	0.333333
434363	100034	species	Massariosphaeria roumeguerei					0.5	0.5	0.5	0	0	0.529412	0.333333
438769	42303	species	Cercophora acanthigera					0	0	0	0	0	0.0294118	0
445181	668547	genus	Phaeothecoidea					0.545455	1	0.583333	0.25	1	0.588235	0
446943	112497	species	Ramularia sp. KACC 42532					0.272727	0	0	0	1	0.117647	0
451442	451435	order	Rhizophydiales					0.181818	0.5	0.0833333	0.25	0	0.117647	0.333333
451864	4751	subkingdom	Dikarya					1	1	1	1	1	1	1
451867	147541	subclass	Dothideomycetidae					1	1	1	0.5	1	1	1
451869	159987	order	Botryosphaeriales					0.681818	1	0.666667	0.5	1	0.558824	0
451870	147545	subclass	Chaetothyriomycetidae					0.954545	1	0.916667	0.5	1	0.794118	0.333333
452226	452225	family	Candelariaceae					0.0454545	0.5	0	0	0	0.0882353	0
452227	1520791	order	Umbilicariales					0	0	0	0	0	0.0294118	0
452283	452284	class	Exobasidiomycetes					0.181818	0	0	0	0	0.264706	0
452338	355688	order	Corticiales					0.5	1	0.5	0	1	0.352941	0.333333
452563	134362	family	Cladosporiaceae		Davidiellaceae		Cladosporiaceae (Sacc.) Nann., 1934	1	1	1	0.5	1	1	1
453767	5506	no rank	Fusarium dimerum species complex					0.0909091	0	0.0833333	0	0	0.0588235	0
456999	1322061	species	Rhizoctonia solani		Rhizoctonia praticola			0.0454545	0	0	0	0	0	0
460509	432005	no rank	Cystobasidiomycetes incertae sedis					0.681818	0.5	0.75	0.5	0	0.676471	0.333333
460848	104249	species	Candelaria pacifica					0.0454545	0.5	0	0	0	0.0588235	0
464692	1535529	genus	Chaetospermum					0.0454545	0	0.0833333	0	0	0.0294118	0
464696	464695	species	Giulia tenuis					0	0	0	0	0	0.0294118	0
467151	1167810	species	Betamyces americaemeridionalis				Betamyces americaemeridionalis Letcher 2012	0	0	0	0	0	0	0.333333
470018	452563	genus	Rachicladosporium					0.727273	1	0.666667	0.25	0	0.764706	0.333333
470063	452563	genus	Toxicocladosporium					0.0454545	0	0.25	0	0	0.176471	0
470080	37937	species	Ramichloridium apiculatum					0.0454545	0	0	0	0	0.0588235	0
470099	470097	species	Radulidium sp. CBS 115704					0.136364	0	0.166667	0	0	0.117647	0
470111	1111112	genus	Sympoventuria					0.0909091	0	0	0	0	0.0882353	0
470130	668547	genus	Catenulostroma					0.0909091	0	0	0	0	0.0588235	0
470439	237462	species	Anungitopsis speciosa					0.0909091	0	0	0	0	0.0294118	0
470456	1341135	species	Camptophora hylomeconis		Cyphellophora hylomeconis		Camptophora hylomeconis (Crous, de Hoog & H.D. Shin) Reblova & Unter. 2013	0.0454545	0	0	0	0	0	0
474943	5125	family	Cordycipitaceae					0.181818	0	0.0833333	0	0	0.0882353	0
483470	43220	species	Capronia sp. 97004c					0	0	0	0	0	0.0294118	0
486728	194286	order	Urostylida					0	0	0	0	0	0.0294118	0
487628	1582909	genus	Pleiochaeta					0.0909091	0.5	0.0833333	0	0	0.0294118	0
490731	1884633	genus	Kwoniella					0.0454545	0	0.0833333	0	0	0.176471	0
502745	651026	species	Endosporium populi-tremuloidis					0.363636	0	0.333333	0.5	0	0.176471	0
509727	93809	genus	Jattaea					0	0	0.0833333	0	0	0.0294118	0
511707	5206	species	Cryptococcus sp. SJ11L08					0.0454545	0	0	0	0	0	0
515146	134362	no rank	unclassified Capnodiales					0.227273	0	0.166667	0.25	0	0.147059	0
523340	5043	species	Acremonium sp. BCC 14080					0.0909091	0.5	0	0.25	0	0.0294118	0
531437	237584	species	Teratosphaeria sp. CPC 13963					0.0909091	0	0.0833333	0	0	0.147059	0
531857	100025	genus	Gloniopsis					0	0.5	0.25	0	0	0.0882353	0
531859	603431	genus	Glonium					0.0454545	0	0	0	0	0	0
532535	89443	species	soil fungal sp. DM2-279					0.0454545	0	0.0833333	0	0	0	0
535763	1615853	species	Cystobasidiomycetes sp. BI218					0.136364	0	0.0833333	0	0	0.0588235	0
565392	129384	genus	Allantophoma					0.0909091	0	0	0	0	0	0
565398	5020	genus	Chaetosphaeronema					0.181818	0	0.166667	0	0	0	0.333333
565407	565406	species	Pseudorobillarda phragmitis					0.636364	1	0.25	0.5	0	0.294118	0.666667
565434	242511	species	Selenophoma linicola					0	0.5	0.0833333	0	0	0.0882353	0
566087	405928	species	Hydnobolites cerebriformis					0.0909091	0	0	0	0	0	0
570524	45148	species	Lophiostoma sp. CBS 123543					0.0454545	0	0	0	0	0	0
575986	153036	species	Helotiaceae sp. 795_3_CZ02					0.0454545	0	0	0	0	0	0
603431	715341	family	Gloniaceae					0.136364	0	0	0	0	0.0588235	0
604195	115784	genus	Cyberlindnera		Lindnera			0	0	0	0	0	0.0294118	0
610139	13000	species	Chalara siamense					0.0454545	0	0	0	0	0	0
634182	316340	species	Chaetothyriales sp. TRN1		Chaetothyriales sp.TRN1			0.136364	0	0.25	0	0	0.176471	0
639021	222544	order	Magnaporthales				Magnaporthales Thongkantha, Vijaykrishna & K.D. Hyde 2009	0	0.5	0	0	0	0.0294118	0.333333
644758	71662	species	Monodictys sp. 148					0	0	0	0	0	0.0588235	0
648923	33194	species	Bipolaris sp. HSAUP074449					0.0909091	0	0	0	0	0	0
652292	150231	species	Pezizomycotina sp. 11120					0.0454545	0	0	0	0	0	0
652430	147549	no rank	unclassified Pezizomycetes					0.181818	0.5	0.0833333	0	0	0.0588235	0
652431	5206	species	Cryptococcus sp. ZIM 2300					0.0454545	0	0	0	0	0	0
657374	105767	species	Tremella aff. globispora IMUFRJ 52033					0.0454545	0	0	0	0	0	0
663566	716546	class	Geoglossomycetes				Geoglossomycetes Zheng Wang, C.L. Schoch & Spatafora 2009	0.0454545	0	0	0	0	0	0
668547	134362	family	Teratosphaeriaceae					0.863636	1	0.916667	0.25	1	0.911765	0.666667
673153	189359	genus	Bagadiella					0.681818	0.5	0.666667	0.25	1	0.617647	0.333333
679529	237584	species	Teratosphaeria crispata				Teratosphaeria crispata Carnegie 2011	0.0454545	0	0	0	0	0	0
683158	715340	family	Didymellaceae				Didymellaceae Gruyter, Aveskamp & Verkley 2009	0.954545	1	1	0.5	1	1	1
687987	159075	species	Acremonium curvulum					0.0909091	0	0	0	0	0	0
703475	221678	genus	Tremateia					0.0454545	0	0	0	0	0.0294118	0
703494	703493	species	Mauritiana rhizophorae				Mauritiana rhizophorae Poonyth, K.D. Hyde, Aptroot & Peerally 2000	0	0	0	0	0	0	0.333333
703499	147569	species	Myriangium hispanicum				Myriangium hispanicum J.B. Martnez 1931	0	0	0	0	0	0.0294118	0
706557	1508290	species	Neodevriesia lagerstroemiae		Capnodiales sp. WQ-2013m;Devriesia lagerstroemiae		Devriesia lagerstroemiae Crous & M.J. Wingf. 2009;Neodevriesia lagerstroemiae (Crous & M.J. Wingf.) Crous, 2015	0.272727	0	0	0	0	0.147059	0
708513	34448	species	Marasmius sp. RR-2010d					0	0	0	0	0	0.0294118	0
714941	714940	genus	Tetraplosphaeria					0	0	0	0	0	0	0.333333
715292	92860	family	Amniculicolaceae				Amniculicolaceae Yin. Zhang, C.L. Schoch, J. Fourn., Crous & K.D. Hyde 2009	0.0909091	0	0	0	0	0	0
715298	1255046	family	Lentitheciaceae				Lentitheciaceae Yin. Zhang, C.L. Schoch, J. Fourn., Crous & K.D. Hyde 2009	0.818182	1	0.916667	0.25	1	0.705882	0.666667
715340	92860	suborder	Pleosporineae					1	1	1	0.5	1	1	1
715989	716546	no rank	sordariomyceta					1	1	1	0.5	1	1	1
716545	4890	no rank	saccharomyceta					1	1	1	0.5	1	1	1
716546	147538	no rank	leotiomyceta					1	1	1	0.5	1	1	1
718227	55176	no rank	Preussia/Sporomiella species complex					0.590909	1	0.333333	0	0	0.5	0.333333
718241	718228	species	Sporormiella megalospora		Preussia megalospora;Sporormia megalospora			0.0454545	0	0	0	0	0.0294118	0
742177	584654	species	Anteholosticha monilata		Anteholosticha sp. ZLv-2015b;Anteholosticha sp. Zlv-2015		Anteholosticha monilata (Kahl, 1928) Berger, 2003 in Berger (2006, p. 297)	0	0	0	0	0	0.0294118	0
744530	134362	family	Dissoconiaceae				Dissoconiaceae Crous & de Hoog 2010	0.0454545	0.5	0	0	0	0.176471	0
744552	100051	species	Delitschia anisomera				Delitschia anisomera Luck-Allen & Cain 1975	0.0909091	0	0.0833333	0	0	0	0
749461	683158	genus	Boeremia					0.318182	0	0.0833333	0	0	0.117647	0
754277	89443	species	fungal sp. KRP11					0	0	0	0	0	0.0294118	0
757955	89443	species	fungal sp. ARIZ AZ0512					0	0	0	0	1	0	0
758395	89443	species	fungal sp. ARIZ AZ1016					0.227273	0	0	0	0	0.0588235	0
758403	89443	species	fungal sp. ARIZ AZ1029					0.0909091	0	0	0.25	1	0.147059	0
758427	89443	species	fungal sp. ARIZ AZ1063					0	0	0	0	0	0.0294118	0
761740	89443	species	fungal sp. DA-S-2					0.181818	0	0.0833333	0	1	0.0588235	0.333333
766758	766764	genus	Schwanniomyces				Schwanniomyces Klocker 1909	0	0	0	0	0	0.0294118	0
766764	4892	family	Debaryomycetaceae				Debaryomycetaceae Kurtzman et M. Suzuki 2010	0	0	0.166667	0	0	0.0882353	0
767018	5114	family	Diaporthaceae				Diaporthaceae Hohn. ex Wehm. 1926	0.590909	0.5	0.5	0.25	0	0.294118	0.666667
796413	314149	species	Acanthostigma multiseptatum				Acanthostigma multiseptatum Promputtha & A.N. Mill. 2010	0	0	0	0	0	0.0294118	0
857077	79808	species	Coniochaeta sp. CHTAR121					0.0454545	0	0.166667	0	0	0.0882353	0
859500	39180	species	Corticium boreoroseum				Corticium boreoroseum Boidin & Lanq. 1983	0.0454545	0	0	0	0	0	0
861973	89443	species	fungal sp. mh2223.6					0.181818	0	0	0.25	0	0.0588235	0
872982	412481	species	Asteromella pistaciarum				Asteromella pistaciarum Bremer & Petr. 1947	0.0909091	0	0.0833333	0	0	0.147059	0
879691	286563	species	Devriesia sp. NG_p52					0.0454545	0	0	0	0	0.0294118	0
886458	652430	species	Pezizomycetes sp. WF148					0.0909091	0	0	0	0	0	0
942743	412475	species	Microbotryomycetes sp. TMS-2011					0	0	0	0	0	0.0294118	0
947208	105767	species	Tremella lobariacearum				Tremella lobariacearum Diederich & M.S. Christ. 1996	0	0	0	0	0	0.0294118	0
980150	316340	species	Chaetothyriales sp. M-Cre1-1					0.0454545	0	0	0	0	0	0
980695	165440	species	Dioszegia sp. YM24626					0.454545	1	0.333333	0	0	0.176471	0
981071	3700	tribe	Brassiceae				Brassiceae DC., 1821	0.0454545	0	1	0	0	0.147059	0.333333
990923	38240	species	Basidiomycota sp. zzz1735					0	0	0	0	0	0.0294118	0
997780	37839	species	Dothideales sp. 1 NF-2011					0.545455	0.5	0.333333	0.5	1	0.588235	0
998209	172614	species	Flavoparmelia citrinescens		Parmelia citrinescens		Flavoparmelia citrinescens (Gyelnik) O. Blanco, A. Crespo & Elix 2010;Parmelia citrinescens Gyelnik 1938	0.0454545	0	0.166667	0	0	0.147059	0
1041186	105767	species	Tremella phaeophysciae				Tremella phaeophysciae Diederich & M.S. Christ. 1996	0	0	0	0	0	0.0294118	0
1046566	3618	species	Rumex hypogaeus		Emex australis		Emex australis Steinh.;Rumex hypogaeus T.M.Schust. & Reveal	0	0	0	0	0	0	1
1047167	93133	genus	Zymoseptoria					0.181818	0	0.0833333	0	0	0.0882353	0
1049287	5583	species	Exophiala capensis					0.136364	0.5	0	0	0	0.176471	0
1049288	467980	species	Penidiella aggregata					0.0909091	0	0.0833333	0	0	0.0294118	0
1051142	1051141	species	Camarosporula persooniae		Hendersonia persooniae		Camarosporula persooniae (Henn.) Petr.;Hendersonia persooniae Henn.	0	0	0	0	0	0.0294118	0
1052096	5498	species	Cladosporium halotolerans				Cladosporium halotolerans Zalar, de Hoog & Gunde-Cimerman 2007	0.0454545	0	0	0	0	0.0294118	0
1053258	110618	genus	Thelonectria					0.0454545	0	0	0	0	0	0
1053489	451869	no rank	unclassified Botryosphaeriales					0.454545	0	0.166667	0	1	0.264706	0
1078995	89443	species	fungal sp. BAN-D					0.0909091	0	0	0	0	0	0
1084402	89443	species	fungal sp. 347A TTMM-2011					0.0454545	0	0	0	0	0	0
1091488	5533	species	Rhodotorula sp. 2 MAC-2011b					0.0454545	0	0	0	0	0.0294118	0
1093203	265079	species	Coccomyces proteae					0.5	0.5	0.166667	0.25	0	0.235294	0
1093212	1508290	species	Neodevriesia capensis		Teratosphaeria capensis		Neodevriesia capensis (Crous) Crous, 2015;Teratosphaeria capensis Crous 2011	0.136364	0	0	0	0	0.235294	0
1105073	81067	species	Chytridiomycota sp. LLME1_1 PML-2011i					0.181818	0	0	0	0	0.0588235	0
1108623	89443	species	fungal sp. CZ-2011j					0	0	0.0833333	0	0	0.0294118	0
1111111	159987	order	Venturiales				Venturiales Yin. Zhang, C.L. Schoch & K.D. Hyde 2011	0.5	0	0.166667	0.25	0	0.352941	0
1111112	1111111	family	Sympoventuriaceae				Sympoventuriaceae Yin. Zhang, C.L. Schoch & K.D. Hyde	0.272727	0	0	0.25	0	0.264706	0
1120191	5533	species	Rhodotorula sp. M14					0.5	0.5	0.166667	0.25	0	0.147059	0
1122585	314149	species	Acanthostigma chiangmaiense		Acanthostigma chiangmaiensis		Acanthostigma chiangmaiense Boonmee & K.D. Hyde 2011	0	0	0	0	0	0.0588235	0
1129334	467802	species	Rhizophydiales sp. 1 MV-2011					0.136364	0	0.0833333	0	0	0.0294118	0
1130102	71598	subfamily	Graphidoideae				Graphidoideae Rivas Plata, Lcking and Lumbsch 2012	0.0454545	0	0	0	0	0	0
1130689	138063	species	Seiridium banksiae				Seiridium banksiae Crous & Summerell 2011	0	0	0.0833333	0	0	0	0
1131624	5042	family	Thermoascaceae				Thermoascaceae Apinis 1967	0	0	0.0833333	0	0	0.0294118	0
1150193	165440	species	Dioszegia sp. YM24421					0.227273	0.5	0.333333	0	0	0.0294118	0
1179179	1084655	species	Delastria rosea				Delastria rosea Tul. & C. Tul. 1843	0.0909091	0	0	0	0	0.0294118	0
1179690	5543	species	Trichoderma sp. KBS0814F					0.0454545	0	0	0	1	0.0294118	0.333333
1180586	209473	species	Dothideomycetes sp. genotype 252					0.181818	0	0	0	0	0.147059	0
1180614	209473	species	Dothideomycetes sp. genotype 376					0.0454545	0	0	0	0	0	0
1187120	714650	species	cf. Herpothallon sp. BRY C56027					0.0454545	0	0	0	0	0	0
1196446	103886	genus	Dinemasporium					0.818182	1	0.333333	0.25	1	0.470588	0.666667
1196454	103886	genus	Pseudolachnea					0.181818	0	0.166667	0	0	0.0882353	0
1196455	1196454	species	Pseudolachnea fraxini				Pseudolachnea fraxini Crous 2012	0.181818	0	0.166667	0	0	0.0882353	0
1198470	1198468	species	Entylomatales sp. RP					0	0	0	0	0	0.0588235	0
1198983	2170432	genus	Disculoides					0.0454545	0	0	0	0	0.0588235	0
1208471	68764	species	Geastrum sp. TNS KH-AUS10-72					0.0454545	0	0	0	0	0	0
1208924	1033978	genus	Lectera					0.454545	1	0.583333	0.25	1	0.294118	0.666667
1213737	574935	genus	Schizopora					0.0909091	0.5	0.0833333	0	0	0.0294118	0
1218809	412507	species	Tremellales sp. CCFEE 5196					0.0909091	0	0.0833333	0	0	0.0882353	0
1218810	412507	species	Tremellales sp. CCFEE 5612					0.0909091	0	0	0	0	0.0588235	0
1219434	412507	species	Tremellales sp. SAP708.3					0.136364	0.5	0.25	0	1	0.205882	0.666667
1219436	5220	species	Trimorphomyces sp. SAP1008.3					0.181818	0	0.583333	0	0	0.0294118	0
1219449	5206	species	Cryptococcus sp. SAP963.4					0	0	0	0	0	0.0294118	0
1224812	1343192	species	Deniquelata barringtoniae				Deniquelata barringtoniae Ariyawansa & K.D. Hyde 2013	0.136364	0	0	0	0	0.0588235	0.333333
1234632	79808	species	Coniochaeta canina		Lecythophora canina			0.454545	0	0.25	0	0	0.0882353	0.333333
1255046	92860	suborder	Massarineae					1	1	1	0.5	1	0.970588	1
1258667	45426	species	Ascomycota sp. EK28					0.0909091	0	0.0833333	0	0	0.0588235	0
1280617	13201	species	Phaeococcomyces eucalypti					0	0	0.0833333	0	0	0.0294118	0
1296608	411563	species	Minimedusa cf. polyspora X-14					0.0454545	0.5	0.0833333	0	0	0	0
1301143	88646	subfamily	Xanthorioideae					0.0909091	0	0	0	0	0.0294118	0
1302176	107465	suborder	Teloschistineae					0.136364	0	0	0	0	0.0294118	0
1302238	39937	subfamily	Buellioideae					0.181818	0	0.0833333	0	0	0.117647	0.333333
1303434	1898458	species	Pseudocoleophoma polygonicola				Pseudocoleophoma polygonicola Kaz. Tanaka & K. Hiray., 2015	0.0454545	0	0	0	0	0	0
1303459	100032	species	Keissleriella culmifida		Leptosphaeria culmifida;Metasphaeria culmifida;Sphaeria culmifida;Trichometasphaeria culmifida		Keissleriella culmifida (P. Karst.) S.K. Bose, 1961	0.136364	0.5	0.166667	0	0	0.0588235	0
1303514	36922	species	Diaporthe toxica					0.318182	0.5	0.166667	0.25	0	0.147059	0.333333
1312586	89443	species	fungal sp. F188					0.0909091	0.5	0	0	0	0.0294118	0
1332277	88747	species	Acarospora thamnina		Lecanora cervina var. thamnina			0.5	0.5	0.333333	0.5	0	0.352941	0.333333
1342378	28556	genus	Comoclathris					0.227273	0	0	0	0	0.147059	0
1351845	64899	genus	Pseudoseptoria					0.272727	0	0.25	0	0	0.235294	0
1352506	5206	species	Cryptococcus sp. CBS 12710					0	0	0	0	0	0.0588235	0
1354935	43220	species	Capronia sp. BRO-2013					0.0454545	0	0	0	0	0	0
1385568	1385567	species	Etayoa trypethelii				Etayoa trypethelii (Flakus & Kukwa) Diederich & Ertz	0	0	0	0	0	0.0588235	0
1423643	209473	species	Dothideomycetes sp. LS-2013g					0.0909091	0	0.0833333	0	0	0.0294118	0
1423644	1837870	species	Spissiomyces ramosus				Spissiomyces ramosus L. Su, L.Y. Guo & Xing.Z. Liu, 2016	0.181818	0	0.25	0	0	0.147059	0
1434221	1515431	species	Apenidiella strumelloidea		Cladosporium strumelloideum;Penidiella strumelloidea			0	0	0	0.25	0	0.0294118	0.333333
1446840	1297910	species	Gyrothrix verticillata				Gyrothrix verticillata Piroz., 1962	0.0454545	0.5	0.0833333	0	0	0	0
1450326	92860	family	Lophiotremataceae				Lophiotremataceae K. Hiray. & Kaz. Tanaka, 2011	0	0	0.0833333	0	0	0.0882353	0
1468175	5206	species	Cryptococcus sp. DEC24					0	0	0	0	0	0.0294118	0
1477511	13201	species	Phaeococcomyces mexicanus		Phaeococcomyces mexicana		Phaeococcomyces mexicanus O. Moreno-Rico & Crous, 2014	0.227273	0	0.0833333	0	1	0.235294	0
1496571	150231	species	Pezizomycotina sp. PAH2_7					0.227273	0	0.0833333	0	0	0.264706	0.333333
1499099	103886	genus	Pseudolachnella					0.318182	0.5	0.0833333	0	0	0.235294	0
1504671	100051	species	Delitschia confertaspora					0.0454545	0	0	0	0	0	0
1506662	358905	species	Serendipita sp. MAFF 305841					0.0454545	0	0	0	0	0	0
1507903	1971361	genus	Diplolaeviopsis				Diplolaeviopsis Giralt & D. Hawksw., 1991	0	0	0	0	0	0.0882353	0
1507904	1507903	species	Diplolaeviopsis ranula				Diplolaeviopsis ranula Giralt & D. Hawksw., 1991	0	0	0	0	0	0.0294118	0
1508183	134362	family	Neodevriesiaceae				Neodevriesiaceae Quaedvlieg & Crous, 2014	0.363636	0	0.0833333	0	1	0.323529	0.333333
1508249	1667166	genus	Alfaria					0.545455	1	0.333333	0	0	0.352941	1
1508290	1508183	genus	Neodevriesia					0.363636	0	0.0833333	0	1	0.323529	0
1515416	668547	genus	Austroafricana					0.590909	1	0.5	0.5	1	0.705882	0.333333
1515428	668547	genus	Neocatenulostroma					0.136364	0	0.166667	0	0	0.0882353	0
1515432	668547	genus	Parateratosphaeria					0.136364	0	0.0833333	0	0	0.117647	0
1515438	668547	genus	Myrtapenidiella					0.318182	0.5	0.333333	0	1	0.323529	0.333333
1515599	668547	genus	Pseudoteratosphaeria					0.0454545	0	0	0	0	0.0294118	0
1518507	111584	species	Buellia punctata		Amandinea punctata;Lecidea punctata			0.136364	0	0	0	0	0	0.333333
1520881	147547	no rank	OSLEUM clade					0.681818	0	0.583333	0.5	1	0.617647	0.666667
1521060	37234	species	Spiromastix asexualis		Spiromastigodes asexualis		Spiromastix asexualis D. A. Sutton, L. Rizzo, Stchigel & Guarro, 2014	0	0	0	0	0	0.0294118	0
1524403	45426	species	Ascomycota sp. 3 IP-2014					0	0	0	0	0	0.0294118	0
1524408	1053489	species	Botryosphaeriales sp. 1 IP-2014					0.363636	0	0.0833333	0	1	0.205882	0
1524426	54695	species	Helotiales sp. 4 IP-2014					0.0909091	0	0	0	0	0	0
1524444	243625	species	Venturiaceae sp. IP-2014					0.0909091	0	0	0.25	0	0.147059	0
1524830	1615853	species	Cystobasidiomycetes sp. DSM 28479					0.0454545	0	0	0	0	0	0
1536653	116785	species	Amandinea coniops		Buellia coniops;Lecidea coniops			0.0454545	0	0	0	0	0.0294118	0
1538025	42302	genus	Echria				Echria (N. Lundq.) Kruys, Huhndorf and A.N. Mill.,	0.0454545	0	0	0	0	0	0
1540118	92860	family	Thyridariaceae		Roussoellaceae			0.0454545	0	0	0	0	0.0294118	0
1541030	92862	species	Pleosporales sp. KO-groupE 2014					0	0	0	0	0	0.0588235	0
1541146	316340	species	Chaetothyriales sp. MP-2014					0	0	0	0	0	0.0294118	0
1541441	314148	species	Helicoma sp. NRRL 66050					0	0	0	0	0	0.0294118	0
1542784	39679	species	Arthonia mediella		Opegrapha mediella			0.0454545	0	0.0833333	0	0	0.0588235	0
1559925	1635105	species	Cyclopsomyces plurioperculatus				Cyclopsomyces plurioperculatus K. Seto & Y. Degawa, 2015	0.0454545	0	0	0	0	0	0
1562865	286563	species	Devriesia sp. ZWY-2014b					0.0909091	0	0	0	0	0.0294118	0
1565365	89443	species	fungal sp. C1/08					0.181818	0	0.0833333	0	0	0	0
1570301	5014	family	Saccotheciaceae		Aureobasidiaceae;Saccotheciei			0.954545	1	1	0.5	1	1	1
1572707	159987	order	Tubeufiales					0.590909	1	0.5	0.5	0	0.558824	0
1581159	5234	family	Rhynchogastremataceae					0.909091	1	0.833333	0.5	1	0.5	0.666667
1581692	5533	species	Rhodotorula sp. UFMG-ABT656					0	0	0	0	1	0.0588235	0
1585410	151555	species	Eurotiomycetes AZ1057					0.0909091	0	0	0	0	0.0588235	0
1586329	38240	species	Basidiomycota sp. 4 IP-2014					0.0454545	0	0	0	0	0	0
1589771	34374	genus	Sphaerellopsis				Sphaerellopsis Cook, 1883	0.0454545	0	0.0833333	0	0	0.0294118	0
1602727	62131	species	Capnobotryella sp. 130A					0	0	0	0	0	0.0294118	0
1604202	37840	species	Pestalotiopsis sp. CJL-2014					0.136364	0.5	0	0	0	0.0882353	0
1615853	432005	no rank	unclassified Cystobasidiomycetes					0.181818	0	0.166667	0	0	0.0882353	0
1618111	1618100	no rank	Phaeomoniellales incertae sedis					0.454545	0.5	0.166667	0	1	0.441176	0
1623265	37234	species	Spiromastix sp. CBS 138268					0	0	0	0	0	0.0294118	0
1634513	110618	genus	Xenogliocladiopsis					0.0454545	0	0	0.25	0	0.0882353	0
1634515	1634513	species	Xenogliocladiopsis cypellocarpa		Xenogliocladiopsis cypellocarpum		Xenogliocladiopsis cypellocarpa L. Lombard & Crous, 2015	0.0454545	0	0	0.25	0	0.0882353	0
1647800	1329062	species	Terana caerulea		Byssus caerulea;Byssus coerulea;Terana coerulea		Terana caerulea (Schrad. ex Lam.) Kuntze, 1891	0	0	0	0	0	0.0882353	0
1652681	5206	species	Cryptococcus sp. yHKS491					0	0	0	0	0	0.0294118	0
1654578	1508298	species	Circinotrichum maculiforme		Psilonia maculiformis		Circinotrichum maculiforme Nees, 1817	0.0454545	0	0	0	0	0	0
1656977	45426	species	Ascomycota sp. UNEX FECRGA 2012E484					0.0909091	0.5	0	0.25	0	0	0
1664452	316340	species	Chaetothyriales sp. G4.5E1d					0.0454545	0.5	0	0	0	0.0882353	0
1664454	316340	species	Chaetothyriales sp. G7.5F1a2					0.0454545	0	0	0	0	0.0294118	0
1667166	5125	family	Stachybotryaceae		Stachybotriaceae			1	1	0.833333	0.5	1	0.882353	1
1671274	5020	genus	Wojnowiciella					0.136364	0	0	0	0	0.0294118	0
1671301	1618111	genus	Pseudophaeomoniella					0.136364	0	0	0	0	0.0588235	0
1679014	162454	genus	Fusariella					0.272727	1	0.0833333	0	0	0.117647	0
1679015	1679014	species	Fusariella sinensis				Fusariella sinensis H.M. Liu & T.Y. Zhang, 2006	0.272727	1	0.0833333	0	0	0.117647	0
1682408	1682405	genus	Selenodriella					0	0	0	0	0	0.0588235	0
1682409	1682408	species	Selenodriella cubensis				Selenodriella cubensis Hern.-Restr. & Crous, 2015	0	0	0	0	0	0.0588235	0
1688507	415704	species	Tausonia sp. KBP 4496					0.0454545	0.5	0.25	0	0	0.147059	0
1690601	430999	species	Knufia marmoricola				Knufia marmoricola Onofri & Zucconi, 2015	0	0.5	0.0833333	0	0	0.0294118	0
1697545	139141	species	cf. Tubulicrinis sp. 7 LR-2015					0.0454545	0.5	0	0	0	0.0294118	0
1702109	1932622	species	Brunneoclavispora bambusae				Brunneoclavispora bambusae Phook. & K.D. Hyde, 2015	0.0454545	0	0	0	0	0	0
1707701	37463	species	Phoma sp.					0	0	0	0	0	0.0294118	0
1709937	366822	species	Lecanoromycetes sp.					0	0	0	0	0	0.0882353	0
1709938	159638	species	Leotiomycetes sp.					0.272727	0	0.166667	0.5	0	0.0882353	0
1709939	45426	species	Ascomycota sp.					0.0454545	0	0.0833333	0	0	0.0588235	0
1709941	89443	species	fungal sp.					0.590909	0.5	0.166667	0.25	1	0.382353	0.333333
1718875	5583	species	Exophiala sp.					0	0	0.0833333	0	0	0.0294118	0
1738095	5255	species	Dacrymyces sp. KA12-0403					0.181818	0	0.166667	0	0	0	0
1738763	89443	species	fungal sp. F6_OT2A-300					0	0	0	0	0	0.0294118	0
1750783	316340	species	Chaetothyriales sp. A1022					0.0454545	0	0	0	0	0.0294118	0
1750907	1663550	species	Lichenostigmatales sp. A930					0.681818	0.5	0.333333	0.25	1	0.382353	0.333333
1755422	47744	species	Cistella sp.					0.0454545	0	0	0	0	0	0
1755443	92862	species	Pleosporales sp.					0.5	1	0.333333	0.5	1	0.5	0.333333
1755765	756399	species	Tayloriella erythrosticta		Lecanora erythrosticta		Tayloriella erythrosticta (Taylor) S. Y. Kondr., Krnefelt, A. Thell, Elix, J. Kim, A. S. Kondratiuk & J.-S. Hur, 2015	0.0454545	0	0	0	0	0.0294118	0
1756098	515146	species	Capnodiales sp.					0	0	0	0	0	0.0294118	0
1756114	155415	species	Monosporascus sp.					0.0454545	0	0	0	0	0	0
1759442	1851469	family	Trichosporonaceae					0.0454545	0	0	0	0	0	0
1763018	147498	genus	Cryptocoryneum					0.0454545	0	0.0833333	0	0	0.0294118	0
1769453	290882	genus	Semifissispora					0.5	1	0.333333	0.25	1	0.235294	0
1769455	1769453	species	Semifissispora natalis				Semifissispora natalis Crous, J. Edwards & P.W.J. Taylor, 2015	0.5	1	0.25	0.25	1	0.205882	0
1769456	1769453	species	Semifissispora rotundata				Semifissispora rotundata H.J. Swart, 1982	0.0454545	0	0	0	1	0	0
1770170	683158	genus	Neoascochyta					0.5	0.5	0.5	0.25	0	0.588235	0
1792690	1792689	species	Crumenulopsis sororia		Crumenula sororia		Crumenulopsis sororia (P. Karst.) J.W. Groves, 1969	0	0	0	0	0	0.0294118	0
1798079	47022	species	Orbilia sp. HOB-2016ay					0	0	0	0	1	0.0294118	0
1798808	460509	genus	Symmetrospora					0.545455	0.5	0.75	0.5	0	0.529412	0.333333
1798813	460509	genus	Buckleyzyma					0.181818	0	0.0833333	0	0	0.205882	0
1798851	452282	genus	Phyllozyma					0.0454545	0	0	0.25	0	0	0
1798857	48847	genus	Pseudobensingtonia					0	0	0	0.25	0	0.0588235	0
1798865	48846	family	Kondoaceae					0.272727	0	0.583333	0	0	0.235294	0.333333
1798998	222545	no rank	unclassified Xylariomycetidae					0.0454545	0	0	0	0	0	0
1799696	231213	family	Sporidiobolaceae					0.818182	1	0.75	0.75	1	0.823529	0
1799703	1799696	genus	Rhodosporidiobolus					0.0454545	0	0	0	0	0.0588235	0
1799785	162483	family	Chrysozymaceae					0.863636	1	0.916667	0.5	0	0.588235	0.333333
1801565	1799785	genus	Sampaiozyma					0.863636	1	0.916667	0.5	0	0.588235	0.333333
1802941	45307	genus	Pseudostrickeria					0	0	0	0	0	0.0294118	0
1802942	1802941	species	Pseudostrickeria muriformis				Pseudostrickeria muriformis Wanasinghe, Q. Tian, Camporesi & K.D. Hyde, 2015	0	0	0	0	0	0.0294118	0
1812776	37989	family	Sporocadaceae					0.409091	0.5	0.5	0	1	0.264706	0
1828766	55176	genus	Sparticola					0	0	0.0833333	0	0	0	0
1834865	5206	species	Cryptococcus sp. 9.L31					0.0909091	0	0	0	0	0.0294118	0
1834872	62074	species	Sarcinomyces sp. 9.L27					0.136364	0	0	0	0	0.205882	0
1835684	531413	species	Lamiales environmental sample					0.0454545	0	0	0.25	0	0.0588235	0
1844887	55067	species	Phaeosphaeria sp. CX					0.136364	0.5	0.166667	0	1	0.117647	0
1850153	5583	species	Exophiala sp. DTO 305-D1					0.136364	0	0	0	0	0.0294118	0
1851470	1851469	family	Tetragoniomycetaceae				Tetragoniomycetaceae Oberw. & Bandoni, 1981	0.181818	0	0.0833333	0.25	1	0.205882	0
1851509	5408	genus	Naganishia					0.227273	0.5	0.416667	0	0	0.0882353	0
1851551	90883	family	Mrakiaceae					0.227273	0.5	0.333333	0	0	0.323529	0
1851555	5408	genus	Heterocephalacria					0.181818	0	0.0833333	0	0	0.147059	0
1852212	45426	species	Ascomycota sp. 1 PV-2016					0.0454545	0	0	0	0	0	0
1853264	2059301	species	Dematiopleospora cirsii				Dematiopleospora cirsii Wanas., Camporesi, E.B.G. Jones & K.D. Hyde, 2015, nom.inval.;Dematiopleospora cirsii Wanas., Camporesi, E.B.G. Jones & K.D. Hyde, 2017	0.181818	0	0.166667	0	1	0.176471	0.333333
1853266	703475	species	Tremateia arundicola				Tremateia arundicola Wanas., E.B.G. Jones & K.D. Hyde, 2016	0.0454545	0	0	0	0	0.0294118	0
1859699	1859696	species	Albifimbria verrucaria		Myrothecium verrucaria;Peziza verrucaria		Albifimbria verrucaria (Alb. & Schwein.) L. Lombard & Crous, 2016	0.0454545	0	0	0	0	0	0
1859940	1667166	genus	Paramyrothecium					0.363636	0	0.0833333	0	0	0.235294	0.333333
1871383	92987	species	Phaeotheca salicorniae				Phaeotheca salicorniae Crous & Roets, 2016	0.0454545	0	0	0	0	0.0588235	0
1871902	284609	species	Strigula nitidula				Strigula nitidula Mont., 1842	0.409091	0.5	0.416667	0	0	0.294118	0
1873266	93133	genus	Neopseudocercosporella					0	0	0.0833333	0	0	0	0
1874898	1231880	species	Trechisporales sp.					0.0454545	0	0	0	0	0	0
1882907	1197700	species	Microbotryozyma sp. C2-13					0.0454545	0	0	0	0	0.0588235	0
1884633	5234	family	Cryptococcaceae					1	1	1	0.5	1	0.970588	1
1890237	5234	family	Trimorphomycetaceae					0.5	0.5	0.583333	0.25	0	0.264706	0
1890241	1890238	species	Carlosrosaea sp. 1 ML-2016					0.136364	0	0	0.25	0	0.0882353	0
1890244	1890237	genus	Saitozyma					0.409091	0.5	0.333333	0	0	0.147059	0
1890245	1890244	species	Saitozyma sp. BSB 30					0.0454545	0	0	0	0	0	0
1890680	268179	species	Cryptotrichosporon brontae		Cryptotrichosporon brontus		Cryptotrichosporon brontae O. Rohl, A. Yurkov & J. P. Sampaio, 2017	0	0	0	0	0	0.0588235	0
1891666	1671297	species	Neophaeomoniella sp.					0	0	0	0	0	0.0294118	0
1891946	1884640	genus	Vishniacozyma					0.954545	1	1	0.75	1	0.705882	0.666667
1898320	1255046	family	Dictyosporiaceae					0.272727	0.5	0.166667	0	1	0.147059	0.333333
1898406	1255055	genus	Fuscostagonospora					0.0454545	0.5	0.0833333	0	0	0	0
1898421	715496	genus	Clypeoloculus					0.0909091	0	0	0	0	0	0
1898458	1898320	genus	Pseudocoleophoma					0.227273	0.5	0.166667	0	1	0.0588235	0.333333
1905114	1905112	genus	Phaeotremella					0.0909091	0	0	0	0	0.117647	0
1909749	1905116	genus	Genolevuria				Genolevuria X.Z. Liu, F.Y. Bai, M. Groenew. & Boekhout, 2015	0.454545	1	0.416667	0.25	0	0.294118	0.333333
1910893	5234	family	Cuniculitremaceae					0	0	0	0.25	0	0.0882353	0
1910953	37989	family	Bartaliniaceae					0.727273	1	0.75	0.5	1	0.588235	0.333333
1911176	1508249	species	Alfaria spartii				Alfaria spartii Senan., Camporesi & K.D. Hyde, 2016	0.0909091	0	0	0	0	0.0294118	0
1917373	5206	species	Cryptococcus sp. DV-2016a					0.772727	1	0.916667	1	1	0.705882	0.333333
1919753	209473	species	Dothideomycetes sp. genotype 724 JMUR-2016					0.0454545	0	0	0	0	0	0
1919922	89443	species	fungal sp. genotype 824 JMUR-2016					0	0	0	0	0	0.0294118	0
1929954	1572707	family	Bezerromycetaceae					0.454545	0.5	0.416667	0.25	0	0.352941	0
1955089	47274	species	Dactylaria sp.					0.0909091	0	0	0	0	0	0
1956015	1956014	species	Clypeophysalospora latitans		Physalospora latitans		Clypeophysalospora latitans (Sacc.) H.J. Swart, 1981;Physalospora latitans Sacc., 1893	0.545455	1	0.5	0.25	0	0.382353	0.333333
1960599	78388	species	Coniothyrium hakeae				Coniothyrium hakeae Crous & Barber, 2016	0.318182	0.5	0.25	0	1	0.352941	0
1960841	1960840	species	Neoscolecobasidium agapanthi				Neoscolecobasidium agapanthi Crous, 2016	0	0	0	0	0	0.117647	0
1960861	371108	species	Saccharata eucalyptorum				Saccharata eucalyptorum Crous, 2016	0.181818	0	0.25	0	0	0.205882	0
1960863	371108	species	Saccharata hakeicola				Saccharata hakeicola Crous, 2016	0	0	0	0	0	0.0294118	0
1960873	1589771	species	Sphaerellopsis hakeae				Sphaerellopsis hakeae Crous, 2016	0.0454545	0	0.0833333	0	0	0.0294118	0
1961798	56761	species	Cyanodermella oleoligni				Cyanodermella oleoligni van Nieuwenhuijzen & Samson, 2016	0	0	0	0	0	0.0294118	0
1962182	37883	genus	Banhegyia					0.181818	0	0	0	0	0.147059	0
1962184	1962182	species	Banhegyia cf. setispora G.M. 2015-04-29.1					0.136364	0	0	0	0	0.0882353	0
1966419	470063	species	Toxicocladosporium hominis		Toxicocladosporium sp. UTHSC DI-13-172		Toxicocladosporium hominis Sandoval-Denis, Gene & Deanna A. Sutton, 2016	0.0454545	0	0.166667	0	0	0.147059	0
1968649	1968648	species	Corticifraga peltigerae		Belonidium peltigerae;Peziza peltigerae;Pseudopeziza peltigerae		Corticifraga peltigerae (Fuckel) D. Hawksw. & R. Sant., 1990;Peziza peltigerae Fuckel, 1871	0.181818	0	0.0833333	0	0	0.0588235	0
1971361	5178	family	Cordieritidaceae					0.0454545	0	0	0	0	0.0882353	0
1971362	5178	family	Cenangiaceae		Hemiphacidiaceae			0.0909091	0	0.0833333	0.25	0	0.117647	0
1971737	1234780	species	Lyomyces mascarensis				Lyomyces mascarensis Riebesehl, Yurchenko & E. Langer , 2017	0	0	0.0833333	0	0	0	0
1981958	162477	genus	Pseudomicrostroma					0	0	0	0	0	0.0294118	0
1983418	2034146	species	Chlamydomonas sp. JIAC4					0	0	0	0	0	0.0588235	0
1986134	278881	species	Myriangiales sp.					0	0	0	0	0	0.0882353	0
1986326	50931	genus	Lepra				Lepra Scop., 1777	0.0454545	0	0	0	0	0	0
2012700	5296	species	Puccinia bassiae				Puccinia bassiae Samuel, 1924	0	0.5	0.0833333	0	0	0.0588235	0
2014862	2014861	species	Davidiellomyces australiensis				Davidiellomyces australiensis Crous, 2017	0.0909091	0	0.0833333	0	0	0.0882353	0
2015261	100032	species	Keissleriella cirsii				Keissleriella cirsii R.H. Perera, Bulgakov, Wanasinghe & K.D. Hyde, 2017	0.0454545	0	0	0	0	0.0588235	0
2015380	2066858	species	Delonicicola siamense				Delonicicola siamense R.H. Perera, Maharachch. & K.D. Hyde, 2017	0.136364	0	0	0	0	0	0
2020803	2020802	species	Malvales environmental sample					0	0	0	0	0	0.0294118	0
2020818	2020817	species	Asparagales environmental sample					0.5	1	0.166667	0	1	0.323529	0.666667
2027812	2027811	species	Classiculaceae sp. YH-2017a					0	0	0	0	0	0.0294118	0
2046349	5206	species	Cryptococcus sp.					0	0	0	0	0	0.0294118	0
2054742	93492	species	Pringsheimia sp.					0.0454545	0	0	0	0	0	0
2059301	5020	genus	Dematiopleospora					0.181818	0	0.166667	0	1	0.176471	0.333333
2080711	91806	species	Trapelia elacista				Trapelia elacista (Ach.) Orange, 2018	0.0454545	0	0	0	0	0	0
2081971	1851575	species	Solicoccozyma sp.					0.0909091	0	0.0833333	0	0	0.0588235	0
2086676	1898406	species	Fuscostagonospora cytisi				Fuscostagonospora cytisi Jayasiri, Camporesi & K.D. Hyde, 2017	0.0454545	0.5	0.0833333	0	0	0	0
2093500	2093499	species	Fitzroyomyces cyperi				Fitzroyomyces cyperi Crous, 2017	0.0454545	0	0.0833333	0	0	0.0294118	0
2093506	2093505	species	Neoconiothyrium persooniae				Neoconiothyrium persooniae Crous, 2017	0.0454545	0	0	0	0	0.0294118	0
3051	3042	family	Chlamydomonadaceae					0	0	0	0	0	0.0882353	0
3166	3041	class	Chlorophyceae				Chlorophyceae Christensen, 1994	0.227273	0.5	0	0	0	0.117647	0
3524	1437201	order	Caryophyllales		Centrospermae		Caryophyllales Juss. ex Bercht. & J.Presl, 1820	0	0	0	0	0	0.0294118	1
3699	91836	order	Brassicales		Capparales			0.0454545	0	1	0	0	0.147059	0.333333
4027	41943	family	Geraniaceae	geranium family			Geraniaceae Juss., 1789	0	0	0	0.75	0	0.0294118	0
4854	214503	family	Mortierellaceae					0.0454545	0	0	0	0	0	0
4892	4891	order	Saccharomycetales		Endomycetales			0.136364	0	0.166667	0	0	0.176471	0
4893	4892	family	Saccharomycetaceae					0.136364	0	0.0833333	0	0	0.0294118	0
5009	5008	family	Taphrinaceae					0	0	0	0	0	0.0294118	0
5043	129384	genus	Acremonium					0.0909091	0.5	0	0.25	0	0.0294118	0
5103	33183	family	Ascosphaeraceae					0.0454545	0	0	0	0	0	0
5133	110618	genus	Nectria					0	0	0	0	0	0.0588235	0
5215	5234	family	Tremellaceae					0.863636	1	0.833333	0.25	1	0.823529	0.666667
5226	355688	order	Auriculariales					0.0909091	0.5	0.0833333	0	0	0.0588235	0
5227	5226	family	Auriculariaceae					0	0.5	0	0	0	0	0
5245	5244	family	Septobasidiaceae					0	0	0	0	0	0.0588235	0
5255	5254	genus	Dacrymyces					0.181818	0	0.166667	0	0	0	0
5262	5258	family	Pucciniaceae					0.227273	0.5	0.333333	0	0	0.352941	0
5263	5262	genus	Uromyces					0.0454545	0	0	0	0	0	0
5267	5257	order	Ustilaginales	smut fungi;smuts				0.0909091	0	0	0	0	0.147059	0
5279	62916	family	Tilletiaceae					0	0	0	0	0	0.0588235	0
5309	80628	genus	Athelia					0.0454545	0	0	0	0	0	0
5339	5338	family	Agaricaceae		Battarreaceae			0	0	0	0	0	0.0588235	0
5408	90886	family	Filobasidiaceae					1	1	1	0.5	1	1	1
5426	5338	family	Lycoperdaceae					0	0	0.0833333	0	0	0.0588235	0
5890	291294	genus	Tetrahymena					0	0	0	0	0	0.0294118	0
13000	159639	genus	Chalara					0.0454545	0	0	0	0	0	0
13786	42111	genus	Trebouxia				Trebouxia Puymaly, 1924	0.363636	0.5	0	0.25	0	0.147059	0
27310	28984	genus	Cephaloascus					0	0	0	0	0	0	0
27330	5008	family	Protomycetaceae					0.454545	0.5	0.333333	0.25	0	0.264706	0
29865	103887	genus	Nectriopsis					0.181818	0.5	0.166667	0	0	0.0294118	0
33159	5185	family	Helvellaceae					0.0909091	0	0	0	0	0.0294118	0
34371	5120	family	Erysiphaceae					0.227273	0.5	0.416667	0.25	0	0.205882	0
34372	34371	genus	Blumeria					0.0909091	0	0.25	0	0	0.117647	0
34418	204043	family	Cystobasidiaceae					0.5	0.5	0.416667	0	0	0.264706	0.333333
34479	34478	family	Spizellomycetaceae					0.0454545	0	0.0833333	0	0	0.0588235	0
37240	221903	family	Myxotrichaceae					0.0909091	0	0	0	0	0	0
37883	37882	family	Patellariaceae		Lecanidiaceae			0.181818	0	0	0	0	0.147059	0
38462	110844	genus	Lambertella					0.181818	0	0.25	0	0	0.0882353	0
39678	39677	family	Arthoniaceae					0.0909091	0	0.166667	0	0	0.0588235	0
39933	157822	family	Lecanoraceae					0	0	0	0	0	0.0294118	0
39941	39940	genus	Mycocalicium					0	0	0	0	0	0.0294118	0
40111	39677	family	Roccellaceae					0	0	0	0	0	0.0294118	0
40424	139380	family	Hymenochaetaceae					0	0	0	0	0	0.0294118	0
40653	665637	genus	Wallrothiella					0.0454545	0	0	0	0	0	0
41954	5338	family	Amanitaceae					0	0	0	0	0	0.0294118	0
42803	77634	genus	Spongiochloris				Spongiochloris Starr, 1955	0.136364	0.5	0	0	0	0.0588235	0
46451	292491	family	Thelebolaceae					0.181818	0.5	0.25	0	0	0.235294	0
46635	64899	genus	Hormonema					0.5	0	0.5	0.25	0	0.5	0
47166	147548	order	Rhytismatales					0.545455	0.5	0.333333	0.25	0	0.323529	0
47196	5186	genus	Iodophanus					0.409091	0.5	0.0833333	0	0	0.117647	0
47218	5189	genus	Saccobolus					0.0909091	0	0.0833333	0	0	0	0
48846	162480	order	Agaricostilbales					0.318182	0	0.583333	0.25	0	0.294118	0.333333
48847	48846	family	Agaricostilbaceae					0.0454545	0	0	0.25	0	0.0588235	0
50931	88639	family	Pertusariaceae					0.0454545	0	0	0	0	0	0
54683	110844	genus	Lanzia					0.0454545	0	0	0	0	0.0588235	0.333333
55071	55070	family	Microbotryaceae					0.0909091	0	0	0	0	0.0588235	0
56189	5338	family	Podaxaceae					0.0454545	0	0	0	0	0	0
56761	56757	genus	Cyanodermella					0	0	0	0	0	0.0294118	0
62131	668547	genus	Capnobotryella					0	0	0	0	0	0.0294118	0
62133	134362	family	Capnodiaceae					0.318182	0.5	0	0.5	0	0.0882353	0.333333
62911	62910	family	Entorrhizaceae					0.136364	0.5	0	0	0	0.0588235	0
62917	162475	family	Microstromataceae					0.0454545	0	0	0	0	0	0
64515	1396497	genus	Rhizophlyctis					0.136364	0	0	0	0	0	0
68763	157608	family	Geastraceae					0.0454545	0	0	0	0	0	0
68793	68792	genus	Botryobasidium					0.0454545	0	0	0	0	0	0
68808	56487	family	Typhulaceae					0	0	0	0	0	0.0294118	0
71662	147498	genus	Monodictys					0	0	0	0	0	0.0588235	0
71934	5338	family	Entolomataceae					0.0909091	0	0.0833333	0	0	0	0
73564	129384	genus	Aporospora					0	0	0	0	0	0.0294118	0
75748	56757	genus	Glomerobolus					0.136364	0	0	0	0	0.147059	0.333333
77634	3042	no rank	Chlamydomonadales incertae sedis		Chlorococcales incertae sedis;Volvocales incertae sedis			0.181818	0.5	0	0	0	0.0882353	0
78388	1460697	genus	Coniothyrium					0.318182	0.5	0.25	0	1	0.352941	0
81067	4761	no rank	unclassified Chytridiomycota					0.181818	0	0	0	0	0.0588235	0
82267	332899	genus	Hyaloraphidium					0	0	0	0	0	0	0
85904	1974272	family	Vorticellidae					0	0	0	0	0	0	0
89802	68798	genus	Hyphoderma					0.0454545	0	0	0	0	0.0294118	0
90883	155616	order	Cystofilobasidiales		Heterobasidiomycetidae			0.772727	1	0.833333	0.25	0	0.617647	0
93492	64899	genus	Pringsheimia					0.0454545	0	0	0	0	0	0
93809	93808	family	Calosphaeriaceae					0	0	0.0833333	0	0	0.0294118	0
100034	147498	genus	Massariosphaeria					0.5	0.5	0.5	0	0	0.529412	0.333333
100051	221679	genus	Delitschia					0.136364	0	0.0833333	0	0	0	0
103393	452342	family	Peniophoraceae					0	0	0	0	0	0.0588235	0
104249	452226	genus	Candelaria					0.0454545	0.5	0	0	0	0.0588235	0
104350	5338	family	Crepidotaceae					0	0	0	0	0	0.0294118	0
104366	5338	family	Pleurotaceae					0.0454545	0	0	0	0	0.0294118	0
107465	388435	order	Teloschistales					0.136364	0	0	0	0	0.0294118	0
109763	109762	genus	Harpochytrium					0.0909091	0	0	0	0	0	0
110158	5139	no rank	Sordariales incertae sedis					0.0454545	0	0	0	0	0.0294118	0
110846	5185	family	Pyronemataceae					0.0454545	0	0	0	0	0	0
111584	1302238	genus	Buellia					0.136364	0	0	0	0	0.0294118	0.333333
112071	432008	genus	Naohidea					0.0454545	0	0	0	0	0	0.333333
115784	4892	family	Phaffomycetaceae		Wickerhamomycetaceae			0	0	0	0	0	0.0588235	0
116785	1302238	genus	Amandinea					0.0454545	0	0	0	0	0.0294118	0
129384	4890	no rank	Ascomycota incertae sedis					0.909091	1	0.833333	0.5	0	0.676471	0.666667
131567	1	no rank	cellular organisms		biota			1	1	1	1	1	1	1
139141	202723	genus	Tubulicrinis					0.0454545	0.5	0	0	0	0.0882353	0
139971	103886	genus	Menispora					0	0	0	0	0	0.0294118	0
146291	451870	order	Verrucariales					0.0909091	0	0.25	0	0	0.0882353	0
147379	147367	tribe	Ehrharteae				Ehrharteae Nevski, 1937	0	0	0	0	0	0.0588235	0
147383	147368	tribe	Stipeae				Stipeae Dumort., 1824	0	0	0	0	0	0.0588235	0
147388	147368	tribe	Bromeae				Bromeae Dumort., 1824	0	0	0	0	0	0.176471	0
147544	92860	family	Teichosporaceae		Floricolaceae			0.272727	0	0.0833333	0	0	0.352941	0
147549	147538	class	Pezizomycetes					0.727273	1	0.333333	0.25	1	0.352941	0.666667
147569	147568	genus	Myriangium					0	0	0	0	0	0.0294118	0
148959	431959	genus	Wallemia					0	0	0	0	0	0.0294118	0
150231	147538	no rank	unclassified Pezizomycotina					0.227273	0	0.0833333	0	0	0.264706	0.333333
151555	147545	no rank	unclassified Eurotiomycetes					0.0909091	0	0	0	0	0.0588235	0
152648	152647	family	Trichosphaeriaceae					0.136364	0	0.166667	0	0	0.117647	0
152655	5114	no rank	Diaporthales incertae sedis					0	0	0.0833333	0	0	0	0
153036	5181	no rank	unclassified Helotiaceae					0.0454545	0	0	0	0	0	0
156300	34395	no rank	Chaetothyriales incertae sedis					0.181818	0	0	0	0	0.205882	0
157252	5405	genus	Muribasidiospora					0	0	0	0	0	0.0294118	0
157821	388282	order	Acarosporales		Acarosporineae			0.5	0.5	0.416667	0.25	0	0.470588	0.333333
157822	5197	suborder	Lecanorineae					0.181818	0	0.25	0	1	0.323529	0
160892	34426	genus	Ceratosebacina					0	0	0	0	0	0.0294118	0
162483	162481	no rank	Microbotryomycetes incertae sedis					0.909091	1	0.916667	0.5	0	0.705882	0.333333
165808	90883	family	Cystofilobasidiaceae					0.727273	1	0.833333	0.5	0	0.588235	0
172614	78060	genus	Flavoparmelia					0.0454545	0	0.166667	0	0	0.147059	0
184208	5338	family	Psathyrellaceae					0.136364	0	0.25	0	0	0.147059	0.333333
188544	188543	genus	Demodex					0.0454545	0	0.0833333	0	0	0.0294118	0
189479	189478	order	Orbiliales					0.681818	1	0.5	0.25	1	0.441176	0.333333
191554	451868	order	Hysteriales					0.181818	0.5	0.333333	0	0	0.205882	0.333333
194286	33829	subclass	Stichotrichia				Stichotrichia Small & Lynn, 1985	0	0	0	0	0	0.0294118	0
195796	5198	genus	Ramalea					0	0	0	0	0	0.0294118	0
205932	147538	no rank	Pezizomycotina incertae sedis					0.136364	0.5	0.166667	0	0	0.0588235	0
209470	92860	no rank	environmental samples					0	0	0	0	0	0.0294118	0
222545	147550	subclass	Xylariomycetidae					0.954545	1	0.916667	0.5	1	0.941176	1
227329	227327	family	Pisolithaceae					0	0	0	0	0	0.0588235	0
227336	227332	family	Suillaceae					0.0454545	0	0	0	0	0	0
228942	5304	genus	Limonomyces					0.272727	0.5	0.333333	0	1	0.235294	0.333333
237462	205932	genus	Anungitopsis					0.0909091	0	0	0	0	0.0294118	0
242511	148100	genus	Selenophoma					0	0.5	0.0833333	0	0	0.0882353	0
243625	5023	no rank	unclassified Venturiaceae					0.0909091	0	0	0.25	0	0.147059	0
248098	1130097	genus	Asterothyrium					0.318182	0	0.25	0.5	0	0.0588235	0
261460	222544	order	Chaetosphaeriales					0.863636	1	0.416667	0.25	1	0.529412	0.666667
265079	47167	genus	Coccomyces					0.5	0.5	0.166667	0.25	0	0.235294	0
271835	56757	genus	Acarosporina					0	0	0	0	0	0.0294118	0
278881	45676	no rank	unclassified Myriangiales					0	0	0	0	0	0.0882353	0
284609	714593	genus	Strigula					0.409091	0.5	0.416667	0	0	0.294118	0
286563	668547	genus	Devriesia					0.0909091	0	0	0	0	0.0588235	0
286660	159987	genus	Peltaster				Peltaster Sydow & P. Sydow 1917	0.0454545	0	0	0	0	0.0294118	0
292187	56757	genus	Carestiella					0.0909091	0	0.0833333	0	0	0.0588235	0
314148	43216	genus	Helicoma					0	0	0	0	0	0.0294118	0
332217	138177	genus	Neochlorosarcina				Neochlorosarcina S.Watanabe, 1983	0.136364	0.5	0	0	0	0.0588235	0
333826	7147	no rank	environmental samples					0.0454545	0	0	0	0	0.0294118	0
358905	1506295	genus	Serendipita		Piriformospora			0.0454545	0	0	0	0	0	0
361669	3090	genus	Hemiflagellochloris					0	0	0	0	0	0.0294118	0
364710	146292	genus	Endocarpon					0.0454545	0	0.0833333	0	0	0.0588235	0
366822	147547	no rank	unclassified Lecanoromycetes					0	0	0	0	0	0.0882353	0
399129	5114	family	Cryphonectriaceae					0.0454545	0	0	0	0	0	0
407091	189359	genus	Plectosphaera					0.727273	1	0.833333	0.5	1	0.823529	0.333333
407949	159987	genus	Fusculina					0.181818	0	0.0833333	0.25	0	0.147059	0
412475	162481	no rank	unclassified Microbotryomycetes					0	0	0	0	0	0.0294118	0
412481	159987	genus	Asteromella					0.0909091	0	0.0833333	0	0	0.147059	0
412507	5234	no rank	unclassified Tremellales					0.318182	0.5	0.333333	0	1	0.294118	0.666667
415704	1851551	genus	Tausonia		Guehomyces			0.0454545	0.5	0.25	0	0	0.147059	0
426519	162475	family	Quambalariaceae					0.0454545	0	0	0	0	0.117647	0
451435	4761	class	Chytridiomycetes					0.227273	0.5	0.166667	0.25	0	0.205882	0.333333
451453	451442	family	Kappamycetaceae					0.0454545	0	0	0	0	0.117647	0
451868	147541	subclass	Pleosporomycetidae					1	1	1	0.5	1	1	1
451871	147545	subclass	Eurotiomycetidae					0.181818	0	0.25	0	0	0.382353	0.333333
452225	189476	order	Candelariales					0.0454545	0.5	0	0	0	0.0882353	0
452282	452281	family	Spiculogloeaceae				Spiculogloeaceae Denchev 2009	0.0454545	0	0	0.25	0	0	0
452284	5204	subphylum	Ustilaginomycotina					0.409091	0.5	0.333333	0.25	0	0.676471	0.333333
452333	155619	subclass	Agaricomycetidae					0.363636	0.5	0.5	0	0	0.5	0.333333
452334	452333	order	Atheliales					0.0454545	0	0	0	0	0	0
452342	355688	order	Russulales		Hericiales;Stereales			0.0454545	0	0	0	0	0.0588235	0.333333
464695	139065	genus	Giulia					0	0	0	0	0	0.0294118	0
467802	451442	no rank	unclassified Rhizophydiales					0.136364	0	0.0833333	0	0	0.0294118	0
467980	668547	genus	Penidiella					0.0909091	0	0.0833333	0	0	0.0294118	0
470097	129384	genus	Radulidium					0.136364	0	0.166667	0	0	0.117647	0
531413	4143	no rank	environmental samples					0.0454545	0	0	0.25	0	0.0588235	0
565406	147498	genus	Pseudorobillarda					0.636364	1	0.25	0.5	0	0.294118	0.666667
574935	139380	family	Schizoporaceae					0.0909091	0.5	0.0833333	0	0	0.0294118	0
584654	578128	genus	Anteholosticha				Anteholosticha Berger, 2003	0	0	0	0	0	0.0294118	0
599737	115784	genus	Wickerhamomyces					0	0	0	0	0	0.0294118	0
640623	147387	subtribe	Aveninae				Aveninae J.Presl, 1830	0	0.5	0.0833333	0	0	0.411765	0
640630	1652081	subtribe	Loliinae				Loliinae Dumort., 1829	0	0	0	0	1	0.352941	0
651026	703500	genus	Endosporium					0.363636	0	0.333333	0.5	0	0.176471	0
654128	5338	family	Marasmiaceae					0	0.5	0	0	0	0.0588235	0
681950	1028384	family	Glomerellaceae					0.636364	1	0.583333	0.25	1	0.617647	0.666667
703493	1298587	genus	Mauritiana					0	0	0	0	0	0	0.333333
714650	39678	genus	Herpothallon					0.0454545	0	0	0	0	0	0
714940	92860	family	Tetraplosphaeriaceae				Tetraplosphaeriaceae Kaz. Tanaka & K. Hiray 2009	0	0	0	0	0	0	0.333333
715341	451868	no rank	Pleosporomycetidae incertae sedis					0.136364	0	0	0	0	0.0588235	0
715496	1255046	family	Morosphaeriaceae				Morosphaeriaceae Suetrong, Sakayaroj, E.B.G. Jones, & C.L. Schoch 2009	0.0909091	0	0	0	0	0	0
715962	716546	no rank	dothideomyceta					1	1	1	0.5	1	1	1
718228	718227	genus	Sporormiella					0.0454545	0	0	0	0	0.0294118	0
742845	162474	family	Malasseziaceae				Malasseziaceae Denchev & R.T. Moore 2009	0.181818	0.5	0.333333	0.25	0	0.411765	0.333333
746524	102821	subtribe	Arctotidinae				Arctotidinae (Cass.) Dumort., 1829	0.318182	0	0	0	0	0	0
756399	1755755	genus	Tayloriella				Tayloriella S. Y. Kondr., Krnefelt, A. Thell, Elix & J.-S. Hur, 2016	0.0454545	0	0	0	0	0.0294118	0
862241	5338	family	Physalacriaceae				Physalacriaceae Corner 1970	0.0454545	0	0	0	0	0	0
1033978	1028384	family	Plectosphaerellaceae				Plectosphaerellaceae W.Gams, Summerbell & Zare 2007	0.545455	1	0.666667	0.25	1	0.323529	0.666667
1051141	668547	genus	Camarosporula					0	0	0	0	0	0.0294118	0
1084655	5186	genus	Delastria					0.0909091	0	0	0	0	0.0294118	0
1110386	1110380	tribe	Rumiceae				Rumiceae Dumort., 1827	0	0	0	0	0	0	1
1131492	5042	family	Aspergillaceae				Aspergillaceae Link 1826	0.181818	0	0.166667	0	0	0.294118	0
1134080	34478	family	Powellomycetaceae				Powellomycetaceae D.R. Simmons	0	0	0	0	0	0.0588235	0
1163720	231212	family	Leucosporidiaceae					0.818182	0.5	0.25	0.75	0	0.441176	0.666667
1167810	1167809	genus	Betamyces					0	0	0	0	0	0	0.333333
1171044	5114	family	Harknessiaceae				Harknessiaceae Crous 2012	0.454545	0	0.5	0.25	1	0.235294	0
1197700	63282	genus	Microbotryozyma				Microbotryozyma Suh, Maslov, Molestina & Zhou 2012	0.0454545	0	0	0	0	0.0588235	0
1198468	62914	no rank	unclassified Entylomatales					0	0	0	0	0	0.0588235	0
1229510	452343	family	Hydnodontaceae				Hydnodontaceae Juelich 1981	0.0909091	0	0.0833333	0	0	0.0294118	0
1231880	452343	no rank	unclassified Trechisporales					0.0454545	0	0	0	0	0	0
1233474	34395	family	Trichomeriaceae				Trichomeriaceae Chomnunti & K.D. Hyde 2012	0.590909	1	0.333333	0	1	0.294118	0.333333
1234780	5304	genus	Lyomyces					0	0	0.0833333	0	0	0	0
1255055	1255046	no rank	Massarineae incertae sedis					0.0454545	0.5	0.0833333	0	0	0	0
1297910	205932	genus	Gyrothrix					0.0454545	0.5	0.0833333	0	0	0	0
1302181	388435	order	Caliciales		Physciineae			0.227273	0	0.0833333	0	0	0.147059	0.333333
1322061	5250	genus	Rhizoctonia					0.0454545	0	0	0	0	0	0
1329062	396331	genus	Terana					0	0	0	0	0	0.0882353	0
1341112	34395	family	Cyphellophoraceae				Cyphellophoraceae Reblova & Unter. 2013	0.181818	0	0.166667	0	1	0.0882353	0.333333
1341135	66611	genus	Camptophora					0.0454545	0	0	0	0	0	0
1343192	221678	genus	Deniquelata					0.136364	0	0	0	0	0.0588235	0.333333
1344078	452338	no rank	Corticiales incertae sedis					0.136364	0	0	0	0	0.0588235	0
1385565	1385564	family	Phaeococcomycetaceae					0.636364	1	0.583333	0.25	1	0.5	0.333333
1385567	1385565	genus	Etayoa				Etayoa Diederich & Ertz, 2013	0	0	0	0	0	0.0588235	0
1406929	189479	no rank	Orbiliales incertae sedis					0	0	0.0833333	0	0	0.0294118	0
1424649	451869	family	Phyllostictaceae				Phyllostictaceae Fr.	0.0909091	0	0.0833333	0	0	0.0588235	0
1450292	451869	family	Saccharataceae				Saccharataceae Slippers, Boissin & Crous, 2013	0.227273	0	0.5	0	0	0.264706	0
1484953	147548	order	Phacidiales					0.363636	0.5	0.25	0.25	0	0.264706	0
1508298	37990	genus	Circinotrichum					0.0454545	0	0	0	0	0	0
1515431	668547	genus	Apenidiella					0	0	0	0.25	0	0.0294118	0.333333
1520784	1520783	family	Trapeliaceae					0.0454545	0	0.0833333	0	0	0	0
1520791	1520881	subclass	Umbilicariomycetidae					0	0	0	0	0	0.0294118	0
1535325	766764	no rank	Candida/Lodderomyces clade					0	0	0	0	0	0.0294118	0
1535529	297313	no rank	Sebacinales incertae sedis					0.0454545	0	0.0833333	0	0	0.0294118	0
1535530	5114	family	Schizoparmaceae					0.227273	0	0.166667	0.5	0	0.176471	0.333333
1582909	715340	no rank	Pleosporineae incertae sedis					0.0909091	0.5	0.0833333	0	0	0.0294118	0
1611264	204043	no rank	Cystobasidiales incertae sedis					0.0454545	0	0	0	0	0	0
1618100	451870	order	Phaeomoniellales				Phaeomoniellales K.-H. Chen, A.E. Arnold, Gueidan & Lutzoni, 2015	0.454545	0.5	0.166667	0	1	0.441176	0
1635105	642599	genus	Cyclopsomyces					0.0454545	0	0	0	0	0	0
1648017	147389	subtribe	Hordeinae				Hordeinae Dumort., 1829	0	0	0	0	0	0.0588235	0
1663550	1385564	no rank	unclassified Lichenostigmatales					0.681818	0.5	0.333333	0.25	1	0.382353	0.333333
1664131	159987	genus	Ramimonilia					0.0909091	0	0.0833333	0	0	0.0588235	0.333333
1671297	1618111	genus	Neophaeomoniella					0	0	0	0	0	0.0294118	0
1676655	451871	no rank	Eurotiomycetidae incertae sedis					0	0	0	0	0	0.0588235	0
1682405	37989	family	Microdochiaceae				Microdochiaceae Hern.-Restr., Crous & J.Z. Groenew., 2015	0.363636	0.5	0.0833333	0	1	0.147059	0
1769247	5303	family	Fomitopsidaceae		Daedaleaceae;Piptoporaceae			0	0	0.0833333	0	1	0.0294118	0
1769459	5178	family	Chaetomellaceae					0.136364	0	0.0833333	0	0	0.117647	0
1792689	1971362	genus	Crumenulopsis					0	0	0	0	0	0.0294118	0
1799786	1799785	genus	Chrysozyma					0.181818	0	0.0833333	0	0	0.0882353	0
1803523	1799785	genus	Yunzhangia					0.454545	0	0.166667	0.5	0	0.0882353	0
1804794	5268	genus	Kalmanozyma					0	0	0	0	0	0.0294118	0
1837870	159987	genus	Spissiomyces					0.181818	0	0.25	0	0	0.147059	0
1851469	155616	order	Trichosporonales				Trichosporonales Boekhout & Fell, 2001	0.227273	0	0.0833333	0.25	1	0.205882	0
1851566	1851565	genus	Piskurozyma					0.0454545	0	0.0833333	0	0	0	0
1851575	1851565	genus	Solicoccozyma					0.0909091	0	0.0833333	0	0	0.0588235	0
1859696	1667166	genus	Albifimbria					0.0454545	0	0	0	0	0	0
1884640	5234	family	Bulleribasidiaceae				Bulleribasidiaceae X.Z. Liu, F.Y. Bai, M. Groenew. & Boekhout, 2016	0.954545	1	1	0.75	1	0.882353	1
1890238	1890237	genus	Carlosrosaea					0.136364	0	0	0.25	0	0.0882353	0
1898439	1255046	family	Periconiaceae					0.409091	0.5	0	0	1	0.176471	0
1905112	5234	family	Phaeotremellaceae					0.0909091	0	0	0	0	0.117647	0
1905116	5234	family	Bulleraceae					0.590909	1	0.5	0.25	1	0.323529	0.333333
1909748	1905116	genus	Fonsecazyma					0.136364	0	0.0833333	0	1	0.0588235	0
1931355	5303	family	Irpicaceae				Irpicaceae Spirin & Zmitr., 2003	0.136364	0	0	0	0	0.0588235	0
1932622	1298587	genus	Brunneoclavispora					0.0454545	0	0	0	0	0	0
1955842	159987	genus	Coniosporium					0	0	0.166667	0	0	0.0294118	0
1956014	189359	genus	Clypeophysalospora					0.545455	1	0.5	0.25	0	0.382353	0.333333
1960840	1150844	genus	Neoscolecobasidium					0	0	0	0	0	0.117647	0
1968648	202888	genus	Corticifraga					0.181818	0	0.0833333	0	0	0.0588235	0
2014861	452563	genus	Davidiellomyces					0.0909091	0	0.0833333	0	0	0.0882353	0
2020802	41938	no rank	environmental samples					0	0	0	0	0	0.0294118	0
2020817	73496	no rank	environmental samples					0.5	1	0.166667	0	1	0.323529	0.666667
2024004	5338	family	Mycenaceae					0	0.5	0.0833333	0	0	0.0294118	0
2027811	2027810	no rank	unclassified Classiculaceae					0	0	0	0	0	0.0294118	0
2034146	3052	no rank	unclassified Chlamydomonas					0	0	0	0	0	0.0588235	0
2066858	2066857	genus	Delonicicola					0.136364	0	0	0	0	0	0
2093499	56757	genus	Fitzroyomyces					0.0454545	0	0.0833333	0	0	0.0294118	0
2093505	1460697	genus	Neoconiothyrium					0.0454545	0	0	0	0	0.0294118	0
2126968	2126967	family	Symbiotaphrinaceae					0	0	0.0833333	0	0	0.0588235	0
2170432	5114	family	Erythrogloeaceae				Erythrogloeaceae Senan. et al., 2018	0.0454545	0	0	0	0	0.0588235	0
3041	33090	phylum	Chlorophyta		Chlorophycota;Chlorophyta sensu Bremer 1985		Chlorophyta Pascher, 1914	0.409091	0.5	0	0.25	0	0.205882	0
3090	3042	family	Chlorococcaceae					0	0	0	0	0	0.0294118	0
4143	91888	order	Lamiales					0.0454545	0	0	0.25	0	0.0588235	0
4761	112252	phylum	Chytridiomycota		Mastigomycotina;Monoblepharidomycota			0.272727	0.5	0.166667	0.25	0	0.205882	0.333333
4891	147537	class	Saccharomycetes		Hemiascomycetes			0.136364	0	0.166667	0	0	0.176471	0
5008	147555	order	Taphrinales		Protomycetales			0.454545	0.5	0.333333	0.25	0	0.264706	0
5120	147548	order	Erysiphales					0.227273	0.5	0.416667	0.25	0	0.205882	0
5189	5185	family	Ascobolaceae					0.0909091	0	0.0833333	0	0	0	0
5197	388435	order	Lecanorales					0.318182	0	0.333333	0	1	0.382353	0
5244	162484	order	Septobasidiales					0	0	0	0	0	0.0588235	0
5254	28997	family	Dacrymycetaceae					0.181818	0	0.166667	0	0	0	0
5257	452284	class	Ustilaginomycetes					0.0909091	0	0	0	0	0.147059	0
5258	162484	order	Pucciniales	rust fungi	Uredinales			0.227273	0.5	0.333333	0	0	0.352941	0
5405	5404	family	Exobasidiaceae					0	0	0	0	0	0.0294118	0
7147	33392	order	Diptera					0.0454545	0	0	0	0	0.0294118	0
28984	4892	family	Cephaloascaceae					0	0	0	0	0	0	0
33829	431838	class	Spirotrichea		Spirotricha;Spirotrichia;Spirotrichs		Spirotrichea Buetschli, 1889	0	0	0	0	0	0.0294118	0
34478	451435	order	Spizellomycetales					0.0454545	0	0.0833333	0	0	0.117647	0
37882	159987	order	Patellariales		Lecanidiales			0.181818	0	0	0	0	0.147059	0
39677	147539	order	Arthoniales		Opegraphales			0.0909091	0	0.166667	0	0	0.0882353	0
39940	148099	family	Mycocaliciaceae					0	0	0	0	0	0.0294118	0
41938	91836	order	Malvales					0	0	0	0	0	0.0294118	0
41943	91836	order	Geraniales					0	0	0	0.75	0	0.0294118	0
42111	75966	order	Microthamniales					0.363636	0.5	0	0.25	0	0.147059	0
55070	162481	order	Microbotryales					0.0909091	0	0	0	0	0.0882353	0
56487	355688	order	Thelephorales					0	0	0	0	0	0.0294118	0
62910	62907	order	Entorrhizales					0.136364	0.5	0	0	0	0.0588235	0
62914	452283	order	Entylomatales					0	0	0	0	0	0.0588235	0
62916	452283	order	Tilletiales					0	0	0	0	0	0.0588235	0
63282	55070	family	Ustilentylomataceae					0.0454545	0	0	0	0	0.0588235	0
68792	36064	family	Botryobasidiaceae					0.0454545	0	0	0	0	0	0
68798	5303	family	Hyphodermataceae					0.0454545	0	0	0	0	0.0294118	0
73496	1437197	order	Asparagales				Asparagales Link, 1829	0.5	1	0.166667	0	1	0.323529	0.666667
91836	71275	no rank	malvids					0.0454545	0	1	0.75	0	0.176471	0.333333
93808	222544	order	Calosphaeriales					0	0	0.0833333	0	0	0.0294118	0
102821	219120	tribe	Arctotideae		Arctoteae		Arctotideae Cass., 1819	0.318182	0	0	0	0	0	0
109762	79272	family	Harpochytriaceae					0.0909091	0	0	0	0	0	0
138177	3166	order	Chlorosarcinales					0.136364	0.5	0	0	0	0.0588235	0
139065	5302	no rank	Agaricomycotina incertae sedis					0	0	0	0	0	0.0294118	0
139380	355688	order	Hymenochaetales					0.136364	0.5	0.0833333	0	0	0.147059	0
147367	359160	subfamily	Oryzoideae		Ehrhartoideae			0	0	0	0	0	0.0588235	0
147368	359160	subfamily	Pooideae					0	0.5	0.0833333	0	1	0.911765	0
147387	1648037	tribe	Poeae				Poeae R. Br., 1814	0	0.5	0.0833333	0	1	0.764706	0
147389	1648038	tribe	Triticeae				Triticeae Dumort., 1824	0	0	0	0	0	0.0588235	0
147568	45676	family	Myriangiaceae					0	0	0	0	0	0.0294118	0
148100	5014	no rank	Dothideales incertae sedis					0	0.5	0.0833333	0	0	0.0882353	0
152647	147551	order	Trichosphaeriales					0.136364	0	0.166667	0	0	0.117647	0
157608	452335	order	Geastrales					0.0454545	0	0	0	0	0	0
162474	1538075	order	Malasseziales					0.181818	0.5	0.333333	0.25	0	0.411765	0.333333
162480	29000	class	Agaricostilbomycetes		Agaricostilbomycetidae			0.318182	0	0.583333	0.25	0	0.294118	0.333333
188543	188547	family	Demodicidae					0.0454545	0	0.0833333	0	0	0.0294118	0
189476	147547	no rank	Lecanoromycetes incertae sedis					0.0454545	0.5	0	0	0	0.0882353	0
189478	147538	class	Orbiliomycetes					0.681818	1	0.5	0.25	1	0.441176	0.333333
202723	139380	family	Tubulicrinaceae					0.0454545	0.5	0	0	0	0.0882353	0
202888	5197	no rank	Lecanorales incertae sedis					0.181818	0	0.0833333	0	0	0.0588235	0
204043	432005	order	Cystobasidiales					0.5	0.5	0.416667	0	0	0.264706	0.333333
214503	1137986	order	Mortierellales					0.0454545	0	0	0	0	0	0
221679	92860	family	Delitschiaceae					0.136364	0	0.0833333	0	0	0	0
227327	68889	suborder	Sclerodermatineae					0	0	0	0	0	0.0588235	0
227332	68889	suborder	Suillineae					0.0454545	0	0	0	0	0	0
291294	37093	family	Tetrahymenidae					0	0	0	0	0	0.0294118	0
292491	147548	order	Thelebolales					0.181818	0.5	0.25	0	0	0.235294	0
332899	79272	no rank	Monoblepharidales incertae sedis					0	0	0	0	0	0	0
388282	147547	subclass	Acarosporomycetidae					0.5	0.5	0.416667	0.25	0	0.470588	0.333333
431959	431958	no rank	Wallemiales incertae sedis					0	0	0	0	0	0.0294118	0
432008	432007	family	Naohideaceae				Naohideaceae Denchev 2009	0.0454545	0	0	0	0	0	0.333333
452281	1798830	order	Spiculogloeales					0.0454545	0	0	0.25	0	0	0
452343	355688	order	Trechisporales					0.0909091	0	0.0833333	0	0	0.0294118	0
578128	486728	family	Holostichidae					0	0	0	0	0	0.0294118	0
642599	642598	family	Lobulomycetaceae					0.0454545	0	0	0	0	0	0
665637	252199	family	Amplistromataceae					0.0454545	0	0	0	0	0	0
703500	45676	no rank	Myriangiales incertae sedis					0.363636	0	0.333333	0.5	0	0.176471	0
714593	1824641	family	Strigulaceae					0.409091	0.5	0.416667	0	0	0.294118	0
1028384	222543	order	Glomerellales				Glomerellales Chadef. ex Reblova, W. Gams & Seifert 2011	0.818182	1	0.916667	0.25	1	0.735294	0.666667
1110380	3615	subfamily	Polygonoideae				Polygonoideae Eaton, 1836	0	0	0	0	0	0	1
1130097	71598	subfamily	Gomphilloideae		Asterothyriaceae;Gomphillaceae			0.318182	0	0.25	0.5	0	0.0588235	0
1150844	703495	no rank	Microthyriales incertae sedis					0	0	0	0	0	0.117647	0
1167809	451442	family	Alphamycetaceae				Alphamycetaceae Letcher 2008	0	0	0	0	0	0	0.333333
1298587	92860	family	Halotthiaceae				Halotthiaceae Y. Zhang ter, J. Fourn. & K.D. Hyde 2013	0.0454545	0	0	0	0	0	0.333333
1385564	147539	order	Lichenostigmatales					0.772727	1	0.666667	0.25	1	0.617647	0.333333
1396497	642610	family	Rhizophlyctidaceae				Rhizophlyctidaceae Letcher	0.136364	0	0	0	0	0	0
1437201	91827	no rank	Pentapetalae				Pentapetalae D.E.Soltis, P.S.Soltis & W.S.Judd, 2007	0.363636	0	1	0.75	0	0.264706	1
1460697	715340	family	Coniothyriaceae					0.363636	0.5	0.25	0	1	0.382353	0
1506295	297313	family	Serendipitaceae					0.0454545	0	0	0	0	0	0
1520783	388283	order	Trapeliales					0.0454545	0	0.0833333	0	0	0	0
1652081	147387	no rank	Poeae Chloroplast Group 2 (Poeae type)					0	0	0	0	1	0.352941	0
1755755	88646	subfamily	Brownlielloideae					0.0454545	0	0	0	0	0.0294118	0
1851565	90886	family	Piskurozymaceae				Piskurozymaceae X.Z. Liu, F.Y. Bai, M. Groenew. & Boekhout, 2015	0.136364	0	0.166667	0	0	0.0588235	0
1974272	6021	order	Sessilida				Sessilida Kahl, 1933	0	0	0	0	0	0	0
2027810	204044	no rank	Classiculaceae				Classiculaceae R. Bauer, Begerow, Oberw. & Marvanov, 2003	0	0	0	0	0	0.0294118	0
2066857	37989	family	Delonicicolaceae					0.136364	0	0	0	0	0	0
2126967	1217819	order	Symbiotaphrinales					0	0	0.0833333	0	0	0.0588235	0
3615	3524	family	Polygonaceae	buckwheat family			Polygonaceae Juss., 1789	0	0	0	0	0	0	1
5404	452283	order	Exobasidiales					0	0	0	0	0	0.0294118	0
6021	6020	subclass	Peritrichia		Peritricha;Peritrichida;Peritrichs			0	0	0	0	0	0	0
28997	452332	order	Dacrymycetales					0.181818	0	0.166667	0	0	0	0
33090	2759	kingdom	Viridiplantae	green plants	Chlorobionta;Chlorophyta/Embryophyta group;chlorophyte/embryophyte group		Chlorobionta Bremer, 1985;Viridiplantae Cavalier-Smith, 1981	0.772727	1	1	0.75	1	0.970588	1
33392	33340	cohort	Holometabola		Endopterygota			0.0454545	0	0	0	0	0.0294118	0
37093	31277	no rank	Tetrahymenina					0	0	0	0	0	0.0294118	0
62907	1696033	class	Entorrhizomycetes		Entorrhizomycetidae			0.136364	0.5	0	0	0	0.0588235	0
68889	452333	order	Boletales					0.0454545	0	0	0	0	0.0588235	0
71275	1437201	subclass	rosids					0.0454545	0	1	0.75	0	0.176471	0.333333
75966	3041	class	Trebouxiophyceae				Trebouxiophyceae Friedl, 1995	0.363636	0.5	0	0.25	0	0.147059	0
79272	451454	order	Monoblepharidales					0.0909091	0	0	0	0	0	0
91827	71240	no rank	Gunneridae		core eudicots;core eudicotyledons		Gunneridae D.E.Soltis, P.S.Soltis & W.S.Judd, 2007	0.363636	0	1	0.75	0	0.264706	1
91888	71274	no rank	lamiids		euasterids I			0.0454545	0	0	0.25	0	0.0588235	0
112252	4751	no rank	Fungi incertae sedis					0.318182	0.5	0.166667	0.25	0	0.205882	0.333333
147537	716545	subphylum	Saccharomycotina					0.136364	0	0.166667	0	0	0.176471	0
147551	147550	no rank	Sordariomycetes incertae sedis					0.136364	0	0.166667	0	0	0.117647	0
147555	451866	class	Taphrinomycetes					0.454545	0.5	0.333333	0.25	0	0.264706	0
148099	451879	order	Mycocaliciales					0	0	0	0	0	0.0294118	0
162484	29000	class	Pucciniomycetes		Urediniomycetidae			0.227273	0.5	0.333333	0	0	0.382353	0
188547	188550	superfamily	Cheyletoidea					0.0454545	0	0.0833333	0	0	0.0294118	0
204044	432003	order	Classiculales					0	0	0	0	0	0.0294118	0
219120	4210	subfamily	Cichorioideae				Cichorioideae (Juss.) Chevall., 1852	0.318182	0	0	0	0	0	0
252199	222544	no rank	Sordariomycetidae incertae sedis					0.0454545	0	0	0	0	0	0
359160	4479	no rank	BOP clade					0	0.5	0.0833333	0	1	0.911765	0
431838	5878	subphylum	Intramacronucleata				Intramacronucleata Lynn, 1996	0	0	0	0	0	0.0588235	0
431958	431957	order	Wallemiales					0	0	0	0	0	0.0294118	0
432007	432005	order	Naohideales					0.0454545	0	0	0	0	0	0.333333
452335	155619	subclass	Phallomycetidae					0.0454545	0	0	0	0	0	0
642598	451435	order	Lobulomycetales					0.0454545	0	0	0	0	0	0
642610	451435	order	Rhizophlyctidales					0.136364	0	0	0	0	0	0
703495	159987	order	Microthyriales					0	0	0	0	0	0.117647	0
1137986	1913637	subphylum	Mortierellomycotina					0.0454545	0	0	0	0	0	0
1217819	716546	class	Xylonomycetes				Xylonomycetes R. Gazis & P. Chaverri 2012	0	0	0.0833333	0	0	0.0588235	0
1437197	4447	subclass	Petrosaviidae				Petrosaviidae S.W.Graham & W.S.Judd, 2007	0.5	1	0.25	0	1	0.941176	0.666667
1538075	452284	class	Malasseziomycetes				Malasseziomycetes Boekhout, Q.M. Wang & F.Y. Bai, 2014	0.181818	0.5	0.333333	0.25	0	0.411765	0.333333
1648037	147368	no rank	Poodae				Poodae L.Liou, 1980	0	0.5	0.0833333	0	1	0.764706	0
1648038	147368	no rank	Triticodae				Triticodae T.D. Macfarl. & L.Watson, 1982	0	0	0	0	0	0.0588235	0
1798830	29000	class	Spiculogloeomycetes					0.0454545	0	0	0.25	0	0	0
1824641	159987	order	Strigulales					0.409091	0.5	0.416667	0	0	0.294118	0
4210	4209	family	Asteraceae	daisy family	Compositae		Asteraceae Bercht. & J.Presl, 1820	0.318182	0	0	0	0	0	0
4447	1437183	class	Liliopsida	monocots	Monocotyledoneae			0.5	1	0.25	0	1	0.941176	0.666667
4479	38820	family	Poaceae	grass family	Bambusaceae;Gramineae		Bambusaceae Nakai, 1943;Poaceae Barnhart, 1895	0	0.5	0.0833333	0	1	0.911765	0
5878	33630	no rank	Ciliophora		Ciliata			0	0	0	0	0	0.0588235	0
6020	431838	class	Oligohymenophorea		Holotricha;Oligohymenophora;Oligohymenophorans		Oligohymenophorea de Puytoracetal.,1974	0	0	0	0	0	0.0294118	0
31277	6020	order	Hymenostomatida		Hymenostomata;Hymenostomes			0	0	0	0	0	0.0294118	0
33340	7496	infraclass	Neoptera					0.0454545	0	0	0	0	0.0294118	0
71240	1437183	no rank	eudicotyledons					0.363636	0	1	0.75	0	0.264706	1
71274	1437201	subclass	asterids					0.318182	0	0	0.25	0	0.0588235	0
188550	83145	no rank	Raphignathae					0.0454545	0	0.0833333	0	0	0.0294118	0
431957	5302	class	Wallemiomycetes					0	0	0	0	0	0.0294118	0
432003	29000	class	Classiculomycetes					0	0	0	0	0	0.0294118	0
451454	4761	class	Monoblepharidomycetes					0.0909091	0	0	0	0	0	0
451866	4890	subphylum	Taphrinomycotina					0.454545	0.5	0.333333	0.25	0	0.264706	0
451879	147545	subclass	Mycocaliciomycetidae					0	0	0	0	0	0.0294118	0
452332	5302	class	Dacrymycetes					0.181818	0	0.166667	0	0	0	0
1696033	451864	phylum	Entorrhizomycota				Entorrhizomycota R. Bauer, Garnica, Oberw., K. Riess, M. Wei & Begerow, 2015	0.136364	0.5	0	0	0	0.0588235	0
1913637	112252	phylum	Mucoromycota					0.0454545	0	0	0	0	0	0
4209	91882	order	Asterales				Asterales Link, 1829	0.318182	0	0	0	0	0	0
7496	85512	subclass	Pterygota					0.0454545	0	0	0	0	0.0294118	0
33630	2759	no rank	Alveolata					0	0	0	0	0	0.0588235	0
38820	4734	order	Poales					0	0.5	0.0833333	0	1	0.911765	0
83145	6947	infraorder	Eleutherengona		Eleutherengonides			0.0454545	0	0.0833333	0	0	0.0294118	0
1437183	3398	no rank	Mesangiospermae				Mesangiospermae M.J.Donoghue, J.A.Doyle & P.D.Cantino, 2007	0.636364	1	1	0.75	1	0.970588	1
3398	58024	no rank	Magnoliophyta	angiosperms	Angiospermae			0.636364	1	1	0.75	1	0.970588	1
4734	1437197	no rank	commelinids		Commelinidae;Commeliniflorae			0	0.5	0.0833333	0	1	0.911765	0
6947	83136	suborder	Prostigmata					0.0454545	0	0.0833333	0	0	0.0294118	0
85512	50557	no rank	Dicondylia					0.0454545	0	0	0	0	0.0294118	0
91882	71274	no rank	campanulids		euasterids II			0.318182	0	0	0	0	0	0
50557	6960	class	Insecta					0.0454545	0	0	0	0	0.0294118	0
58024	78536	no rank	Spermatophyta	seed plants				0.636364	1	1	0.75	1	0.970588	1
83136	6946	order	Trombidiformes					0.0454545	0	0.0833333	0	0	0.0294118	0
6946	6933	superorder	Acariformes					0.0454545	0	0.0833333	0	0	0.0294118	0
6960	197562	subphylum	Hexapoda					0.0454545	0	0	0	0	0.0294118	0
78536	58023	no rank	Euphyllophyta		euphyllophytes			0.636364	1	1	0.75	1	0.970588	1
6933	6854	subclass	Acari		Acarina			0.0454545	0	0.0833333	0	0	0.0294118	0
58023	3193	no rank	Tracheophyta	vascular plants			Tracheophyta Sinnott ex Cavalier-Smith, 1998	0.636364	1	1	0.75	1	0.970588	1
197562	197563	no rank	Pancrustacea					0.0454545	0	0	0	0	0.0294118	0
3193	131221	no rank	Embryophyta	higher plants;land plants;plants				0.636364	1	1	0.75	1	0.970588	1
6854	6843	class	Arachnida					0.0454545	0	0.0833333	0	0	0.0294118	0
197563	6656	no rank	Mandibulata	mandibulates				0.0454545	0	0	0	0	0.0294118	0
6656	88770	phylum	Arthropoda					0.0909091	0	0.0833333	0	0	0.0588235	0
6843	6656	subphylum	Chelicerata	chelicerates				0.0454545	0	0.0833333	0	0	0.0294118	0
131221	35493	subphylum	Streptophytina		Charophyta/Embryophyta group;charophyte/embryophyte group			0.636364	1	1	0.75	1	0.970588	1
35493	33090	phylum	Streptophyta				Streptophyta Bremer, 1985	0.636364	1	1	0.75	1	0.970588	1
88770	1206794	no rank	Panarthropoda					0.0909091	0	0.0833333	0	0	0.0588235	0
1206794	33317	no rank	Ecdysozoa					0.0909091	0	0.0833333	0	0	0.0588235	0
33317	33213	no rank	Protostomia					0.0909091	0	0.0833333	0	0	0.0588235	0
33213	6072	no rank	Bilateria					0.0909091	0	0.0833333	0	0	0.0588235	0
6072	33208	no rank	Eumetazoa					0.0909091	0	0.0833333	0	0	0.0588235	0
33208	33154	kingdom	Metazoa	multicellular animals	Animalia			0.0909091	0	0.0833333	0	0	0.0588235	0
-1								0	0	0	0	0	0.0294118	0

## Sheet: Host Cotyledon Clade
taxid	parent_taxid	rank	scientific name	common name	synonym	anamorph	authority	Eudicotyledon	Monocotyledon
1	1	no rank	root		all			1	1
2759	131567	superkingdom	Eukaryota	eukaryotes	Eucarya;Eucaryotae;Eukarya;Eukaryotae			1	1
3042	3166	order	Chlamydomonadales		Chlorococcales;Volvocales;Volvocida			0.113636	0.0882353
3052	3051	genus	Chlamydomonas					0	0.0882353
3542	3524	family	Aizoaceae	iceplant family			Aizoaceae Martinov, 1820	0	0.0294118
3618	1110386	genus	Rumex				Rumex L., 1753	0.0681818	0
3700	3699	family	Brassicaceae		Cruciferae		Brassicaceae Burnett, 1835	0.318182	0.147059
3705	981071	genus	Brassica				Brassica L., 1753	0.272727	0.0294118
3725	981071	genus	Raphanus				Raphanus L.	0.0454545	0
4496	640623	genus	Avena				Avena L., 1753	0.0454545	0.411765
4501	147388	genus	Bromus				Anisantha K.Koch, 1848;Bromus L., 1753	0	0.176471
4512	1648017	genus	Hordeum	barleys			Hordeum L., 1753	0	0.0588235
4520	640630	genus	Lolium				Lolium L., 1753	0.0227273	0.352941
4751	33154	kingdom	Fungi					1	1
4815	34479	genus	Spizellomyces					0.0454545	0.0294118
4855	4854	genus	Mortierella					0.0238095	0
4890	451864	phylum	Ascomycota	sac fungi				0.977273	1
4927	599737	species	Wickerhamomyces anomalus		Candida pelliculosa;Endomyces anomalus;Hansenula anomala;Pichia anomalus;Saccharomyces anomalus;Willia anomala		Saccharomyces anomalus E.C. Hansen, 1889;Wickerhamomyces anomalus (E.C. Hansen) Kurtzman, Robnett & Basehoar-Powers, 2008	0	0.0294118
4930	4893	genus	Saccharomyces		Pachytichospora			0.0909091	0.0294118
4958	766764	genus	Debaryomyces		Wingea			0.0454545	0.0294118
4970	1905116	genus	Bullera					0.0681818	0.117647
4972	165440	species	Dioszegia hungarica		Bullera armeniaca;Cryptococcus hungaricus			0.204545	0.352941
4988	1798865	genus	Bensingtonia					0.238095	0.147059
4990	1798857	species	Pseudobensingtonia ingoldii		Bensingtonia ingoldii		Pseudobensingtonia ingoldii (Nakase & Itoh.) F.Y. Bai, Q.M. Wang, M. Groenew. & Boekhout, 2015	0.0227273	0.0588235
4998	1910893	genus	Kockovaella					0.0227273	0.0882353
5010	5009	genus	Taphrina		Lalaria			0	0.0294118
5014	451867	order	Dothideales					0.931818	1
5020	715340	family	Phaeosphaeriaceae					0.954545	1
5021	34374	genus	Leptosphaeria					0.272727	0.323529
5022	220671	species	Leptosphaeria maculans	blackleg of canola fungus;blackleg of crucifers fungus	Leptosphaeria sp. JW-2011m	Phoma lingam		0.159091	0.147059
5023	1111111	family	Venturiaceae					0.272727	0.294118
5024	5023	genus	Venturia					0.227273	0.176471
5027	28556	genus	Pyrenophora					0.363636	0.558824
5032	62917	genus	Microstroma					0.0238095	0
5042	451871	order	Eurotiales		Elaphomycetales			0.159091	0.352941
5052	1131492	genus	Aspergillus		Petromyces			0.0714286	0.176471
5073	1131492	genus	Penicillium		Eupenicillium			0.0952381	0.147059
5094	28568	genus	Talaromyces					0	0.0588235
5104	5103	genus	Ascosphaera					0.0227273	0
5112	34397	genus	Epichloe					0.0227273	0.0294118
5114	222544	order	Diaporthales					0.818182	0.823529
5117	5114	family	Valsaceae					0.295455	0.529412
5125	222543	order	Hypocreales					0.931818	1
5129	5125	family	Hypocreaceae		anamorphic Hypocreaceae			0.227273	0.294118
5139	222544	order	Sordariales					0.613636	0.529412
5144	42302	genus	Podospora					0.0681818	0.0294118
5146	5148	genus	Sordaria					0	0.0294118
5148	5139	family	Sordariaceae					0.181818	0.176471
5149	35718	genus	Chaetomium					0.136364	0.0294118
5178	147548	order	Helotiales		Leotiales			0.75	0.676471
5181	5178	family	Helotiaceae					0.386364	0.411765
5185	147549	order	Pezizales					0.522727	0.323529
5186	5185	family	Pezizaceae					0.431818	0.323529
5198	157822	family	Cladoniaceae					0	0.0294118
5204	451864	phylum	Basidiomycota					0.977273	1
5206	1884633	genus	Cryptococcus		Filobasidiella			0.954545	0.970588
5209	5408	genus	Filobasidium					0.954545	1
5211	1851566	species	Piskurozyma capsuligena		Filobasidium capsuligenum;Leucosporidium capsuligenum		Filobasidium capsuligenum (Fell, Statzell, I.L. Hunter & Phaff) Rodr. Mir., 1972;Leucosporidium capsuligenum Fell, Statzell, I.L. Hunter & Phaff, 1969;Piskurozyma capsuligena (Fell, Statzell, I.L. Hunter & Phaff) A.M. Yurkov, 2016	0.0454545	0
5220	1890237	genus	Trimorphomyces					0.295455	0.0588235
5230	5227	genus	Auricularia					0.0238095	0
5234	155616	order	Tremellales					0.977273	0.970588
5238	5250	genus	Thanatephorus					0.0238095	0
5246	5245	genus	Septobasidium					0	0.0588235
5250	36064	family	Ceratobasidiaceae					0.159091	0.205882
5251	5250	genus	Ceratobasidium					0.0909091	0.147059
5268	5267	family	Ustilaginaceae					0.0454545	0.147059
5269	5268	genus	Ustilago					0.047619	0.0294118
5277	1163720	genus	Leucosporidium		Leucosporidiella;Mastigobasidium			0.613636	0.441176
5296	5262	genus	Puccinia					0.204545	0.352941
5297	5296	species	Puccinia graminis					0.0454545	0.0588235
5302	5204	subphylum	Agaricomycotina					0.977273	1
5303	355688	order	Polyporales		Aphyllophorales			0.227273	0.352941
5304	452338	family	Corticiaceae					0.386364	0.323529
5305	396331	genus	Phanerochaete					0.047619	0
5307	81064	genus	Phlebia					0.0454545	0.0588235
5317	5303	family	Polyporaceae		Coriolaceae;Cryptoporaceae;Echinochaetaceae;Fomitaceae;Ganodermataceae;Grammotheleaceae;Haddowiaceae;Lentinaceae;Lentinaceae Julich, nom. inval.;Lophariaceae;Microporaceae;Pachykytosporaceae;Perenniporiaceae;Sparsitubaceae;Trametaceae			0.0227273	0.0588235
5320	104366	genus	Pleurotus					0.0238095	0.0294118
5324	5317	genus	Trametes					0.0227273	0
5338	452333	order	Agaricales		Agaricales anamorphs;Hymenogastrales;Lycoperdales;Nidulariales;Tulostomatales;anamorphic Agaricales			0.340909	0.5
5340	5339	genus	Agaricus					0	0.0588235
5351	5338	family	Tricholomataceae					0.0454545	0.147059
5379	227336	genus	Suillus					0.0238095	0
5410	165808	genus	Cystofilobasidium					0.690476	0.588235
5413	165790	genus	Erythrobasidium					0.431818	0.294118
5414	5413	species	Erythrobasidium hasegawianum			Rhodotorula hasegawae		0.380952	0.235294
5418	189450	species	Papiliotrema laurentii		Cryptococcus laurentii;Torula laurentii;Torulopsis laurentii		Papiliotrema laurentii (Kuff.) X.Z. Liu, F.Y. Bai, M. Groenew. & Boekhout, 2016	0.0238095	0.0294118
5427	5426	genus	Lycoperdon					0.0227273	0.0294118
5429	1799696	genus	Sporobolomyces					0.409091	0.352941
5434	1798808	species	Symmetrospora foliicola		Sporobolomyces foliicola		Symmetrospora foliicola (R.G. Shivas & Rodr. Mir.) Q.M. Wang, F.Y. Bai, M. Groenew. & Boekhout, 2015	0.204545	0.205882
5436	1799786	species	Chrysozyma griseoflava		Sporobolomyces griseoflavus		Chrysozyma griseoflava (Nakase & M. Suzuki) Q.M. Wang, F.Y. Bai, M. Groenew. & Boekhout, 2015	0.113636	0.0882353
5455	681950	genus	Colletotrichum					0.613636	0.617647
5468	189359	genus	Robillarda					0.0238095	0
5498	452563	genus	Cladosporium					0.954545	1
5502	28556	genus	Curvularia					0.204545	0.147059
5506	110618	genus	Fusarium		Gibberella			0.863636	0.676471
5531	1667166	genus	Myrothecium					0.727273	0.617647
5533	1799696	genus	Rhodotorula		Rhodosporidium			0.704545	0.735294
5537	5533	species	Rhodotorula mucilaginosa		Rhodotorula mucilaginosa var. mucilaginosa;Rhodotorula pilimanae;Rhodotorula rubra;Sporobolomyces albo-rubescens		Rhodotorula mucilaginosa (A. Jorg.) F.C. Harrison, 1928;Torula mucilaginosa A. Jorg., 1909	0	0.0588235
5538	221903	genus	Scytalidium					0.0227273	0
5543	5129	genus	Trichoderma		Aphysiostroma;Chromocrea;Creopus;Hypocrea;Pseudohypocrea;Sarawakus			0.159091	0.294118
5569	603431	genus	Cenococcum					0.0227273	0.0294118
5579	1570301	genus	Aureobasidium					0.931818	1
5583	43219	genus	Exophiala		Nadsoniella;Wangiella			0.568182	0.411765
5587	43219	genus	Rhinocladiella					0.0227273	0.0588235
5598	28556	genus	Alternaria		Undifilum			0.954545	1
5607	1910893	genus	Fellomyces					0.0227273	0
5615	48847	genus	Sterigmatomyces		Agaricostilbum			0.0227273	0
5909	5890	species	Tetrahymena rostrata				Tetrahymena rostrata Kahl, 1926	0	0.0294118
13201	1385565	genus	Phaeococcomyces					0.590909	0.470588
13289	5279	genus	Tilletia					0	0.0588235
13348	47021	genus	Arthrobotrys					0	0.0294118
15492	1648017	genus	Elymus				Elymus L., 1753	0	0.0588235
21555	4027	genus	Erodium				Erodium L'Her. ex Aiton	0.0681818	0.0294118
27311	27310	species	Cephaloascus fragrans					0	0
27312	29827	genus	Dipodascopsis					0	0.0294118
27331	27330	genus	Protomyces					0.363636	0.264706
27332	27331	species	Protomyces inouyei					0.227273	0.176471
27344	5296	species	Puccinia coronata				Puccinia coronata Corda 1837	0.0454545	0.147059
28556	715340	family	Pleosporaceae		Pyrenophoraceae			0.954545	1
28568	5042	family	Trichocomaceae		Eurotiaceae			0	0.0588235
28983	5178	family	Sclerotiniaceae					0.0454545	0
29000	5204	subphylum	Pucciniomycotina		Urediniomycetes			0.977273	0.941176
29002	93133	genus	Cercospora					0.318182	0.264706
29820	5185	family	Sarcosomataceae					0.0238095	0
29827	4892	family	Lipomycetaceae					0	0.0294118
29828	29827	genus	Lipomyces		Smithiozyma			0	0.0294118
33154	2759	no rank	Opisthokonta		Fungi/Metazoa group;opisthokonts		Opisthokonta Cavalier-Smith 1987	1	1
33183	451871	order	Onygenales		Gymnoascales			0.0454545	0
33184	33183	family	Onygenaceae					0.047619	0
33194	28556	genus	Bipolaris					0.840909	1
33198	28556	genus	Drechslera					0.568182	0.705882
33202	1131624	genus	Paecilomyces					0.0238095	0
34373	34372	species	Blumeria graminis	grass mildew	Erysiphe graminis			0.113636	0.117647
34374	715340	family	Leptosphaeriaceae		Leptosphaeriaceae anamorphs;anamorphic Leptosphaeriaceae			0.659091	0.529412
34379	221903	family	Pseudeurotiaceae					0.0454545	0.0588235
34395	451870	order	Chaetothyriales					0.863636	0.764706
34397	5125	family	Clavicipitaceae					0.0454545	0.0588235
34399	5117	genus	Phomopsis					0.0454545	0.0588235
34416	55071	genus	Microbotryum					0.047619	0.0588235
34419	162483	genus	Colacogloea					0.0238095	0.0588235
34426	5226	family	Exidiaceae					0.0714286	0.0588235
34448	654128	genus	Marasmius					0.0227273	0.0588235
35718	5139	family	Chaetomiaceae					0.431818	0.294118
35724	45131	genus	Macrophomina					0.113636	0.0294118
36054	1798865	genus	Kondoa					0.190476	0.117647
36064	355688	order	Cantharellales		Ceratobasidiales;Tulasnellales			0.25	0.264706
36649	5094	species	Talaromyces aculeatus		Penicillium aculeatum;Penicillium aculeatus		Penicillium aculeatum Raper & Fennell 1948;Talaromyces aculeatus (Raper & Fennell) Samson, Yilmaz, Frisvad & Seifert 2011	0	0.0294118
36913	1535325	genus	Lodderomyces					0	0.0294118
36919	29820	genus	Plectania					0.0238095	0
36922	767018	genus	Diaporthe					0.431818	0.235294
37234	1676655	genus	Spiromastix		Spiromastigoides		Spiromastigoides Doweld, 2013;Spiromastix Kuehn & G.F. Orr, 1962	0	0.0588235
37463	683158	genus	Phoma					0.613636	0.647059
37467	227329	genus	Pisolithus					0	0.0588235
37839	5014	no rank	unclassified Dothideales					0.5	0.676471
37840	1812776	genus	Pestalotiopsis					0.113636	0.0882353
37884	100025	genus	Rhytidhysteron					0.113636	0.117647
37937	744530	genus	Ramichloridium					0.0227273	0.0588235
37989	222545	order	Xylariales		Sphaeriales			0.909091	0.941176
37990	37989	family	Xylariaceae		Sphaeriaceae			0.25	0.205882
37991	37990	genus	Xylaria					0.0909091	0.0588235
38074	388283	order	Ostropales					0.386364	0.382353
38240	5204	no rank	unclassified Basidiomycota		unclassified Teliomycetes;unidentified Basidiomycota			0.181818	0.235294
38452	110844	genus	Rutstroemia					0.190476	0.0294118
38464	38462	species	Lambertella subrenispora					0.166667	0.0882353
38944	862241	genus	Flammulina					0.0238095	0
39180	5304	genus	Corticium					0.0238095	0
39291	5309	species	Athelia rolfsii		Corticium rolfsii	Sclerotium rolfsii	Athelia rolfsii (Curzi) C.C.Tu et Kimbr.;Corticium rolfsii Curzi	0.0227273	0
39679	39678	genus	Arthonia					0.0714286	0.0588235
39702	93133	genus	Septoria					0.409091	0.235294
39934	39933	genus	Lecanora					0	0.0294118
39937	1302181	family	Caliciaceae					0.136364	0.117647
40219	2126968	genus	Symbiotaphrina		Tromeropsis			0.0227273	0.0588235
40415	1769247	genus	Antrodia					0.0454545	0.0294118
40427	1931355	genus	Ceriporia					0.0238095	0
40463	103393	genus	Peniophora					0	0.0588235
40593	5186	genus	Peziza					0	0.0588235
40609	5133	species	Nectria zonata					0	0.0588235
40654	40653	species	Wallrothiella subiculosa					0.0238095	0
40657	1033978	genus	Plectosphaerella			Plectosporium		0.295455	0.205882
40995	45676	family	Elsinoaceae					0.47619	0.5
40996	40995	genus	Elsinoe					0.47619	0.5
41247	2024004	genus	Mycena					0.0454545	0.0294118
41254	93133	genus	Mycosphaerella					0.136364	0.441176
42302	5139	family	Lasiosphaeriaceae					0.386364	0.235294
42303	42302	genus	Cercophora					0	0.0294118
42364	37989	family	Diatrypaceae					0.0238095	0.0294118
42658	1851551	genus	Udeniomyces					0.204545	0.294118
42660	42658	species	Udeniomyces puniceus		Bullera punicea;Candida punicea		Candida punicea Komag. & Nakase, 1965;Udeniomyces puniceus (Komag. & Nakase) Nakase & Takem., 1992	0.159091	0.117647
43083	5186	genus	Plicaria					0.238095	0.0588235
43216	1572707	family	Tubeufiaceae					0.272727	0.352941
43217	43216	genus	Tubeufia					0.0238095	0.0588235
43219	34395	family	Herpotrichiellaceae					0.818182	0.735294
43220	43219	genus	Capronia					0.0227273	0.0588235
44624	33159	genus	Helvella					0.0454545	0.0294118
44653	77634	genus	Tetracystis				Tetracystis R.M.Brown & Bold, 1964	0.0227273	0.0294118
45131	451869	family	Botryosphaeriaceae					0.477273	0.411765
45132	45131	genus	Botryosphaeria					0.142857	0.0882353
45147	92860	family	Lophiostomataceae					0.772727	0.764706
45148	45147	genus	Lophiostoma					0.681818	0.676471
45153	55176	genus	Westerdykella		Eremodothis			0.0227273	0.0294118
45307	92860	family	Melanommataceae					0.0952381	0.0588235
45426	4890	no rank	unclassified Ascomycota		unidentified Ascomycota			0.272727	0.147059
45676	451867	order	Myriangiales					0.571429	0.588235
46452	46451	genus	Thelebolus					0.190476	0.235294
47021	189479	family	Orbiliaceae					0.590909	0.441176
47022	47021	genus	Orbilia					0.52381	0.382353
47167	47166	family	Rhytismataceae					0.386364	0.323529
47197	47196	species	Iodophanus carneus					0.261905	0.117647
47274	47021	genus	Dactylaria					0.181818	0.0294118
47743	5178	family	Hyaloscyphaceae					0.204545	0.147059
47744	47743	genus	Cistella					0.113636	0.0882353
47745	47744	species	Cistella grevillei					0.0909091	0.0294118
47751	47743	genus	Arachnopeziza					0	0.0588235
47817	47743	genus	Lachnum					0.0238095	0
50045	42803	species	Spongiochloris spongiosa				Spongiochloris spongiosa (Vischer) R.C.Starr, 1955	0.0909091	0.0588235
50375	1111112	genus	Fusicladium					0.0952381	0.147059
50934	1302181	family	Physciaceae					0.0454545	0.0882353
50966	5351	genus	Clitocybe					0.047619	0.0294118
54695	5178	no rank	unclassified Helotiales		unclassified Leotiales;unidentified Leotiales			0.0909091	0.0294118
54788	290882	genus	Stagonospora		Saccharicola			0.0454545	0.0882353
54958	37989	family	Amphisphaeriaceae					0.25	0.235294
55067	5020	genus	Phaeosphaeria					0.409091	0.470588
55170	683158	genus	Didymella					0.166667	0.147059
55176	92860	family	Sporormiaceae					0.681818	0.588235
55178	265084	species	Preussia australis		Sporormiella australis		Sporormiella australis (Speg.) S.I.Ahmed & Cain	0.0238095	0
55193	742845	genus	Malassezia					0.25	0.411765
56178	41954	genus	Limacella					0	0.0294118
56190	56189	genus	Podaxis					0.0227273	0
56757	38074	family	Stictidaceae					0.25	0.294118
57474	4970	species	Bullera unica					0.0681818	0.0588235
57687	57692	genus	Fibulobasidium					0.0227273	0.0588235
57692	5234	family	Sirobasidiaceae					0.25	0.235294
58127	290882	genus	Helminthosporium					0.0714286	0.0882353
60849	85904	genus	Vorticella					0	0
61459	1955842	species	Coniosporium apollinis					0.047619	0.0294118
62074	156300	genus	Sarcinomyces					0.0909091	0.205882
62138	62133	genus	Scorias					0.238095	0.0882353
62701	34371	genus	Podosphaera					0.25	0.0882353
63255	62911	genus	Entorrhiza					0.0909091	0.0588235
63298	5268	genus	Pseudozyma					0	0.0882353
64357	47167	genus	Lophodermium					0.0238095	0.0882353
64482	64899	genus	Dothiora					0.309524	0.323529
64517	64515	species	Rhizophlyctis rosea		Karlingia rosea			0.0681818	0
64899	5014	family	Dothioraceae		anamorphic Dothioraceae			0.568182	0.676471
66005	147383	genus	Austrostipa				Austrostipa S.W.L.Jacobs & J.Everett	0	0.0588235
66029	147379	genus	Microlaena				Microlaena R.Br., 1810	0	0.0588235
66516	1484953	family	Phacidiaceae					0.295455	0.264706
66611	34395	family	Chaetothyriaceae					0.0952381	0.0882353
66739	45131	genus	Lasiodiplodia					0.0227273	0.0882353
67608	1682405	genus	Microdochium					0.25	0.0882353
68764	68763	genus	Geastrum					0.0227273	0
68795	68793	species	Botryobasidium subcoronatum					0.0238095	0
68802	5304	genus	Hyphodontia					0.136364	0.0588235
68809	68808	genus	Typhula					0	0.0294118
71598	38074	family	Graphidaceae		Fissurinaceae;Thelotremataceae		Graphidaceae Dumort., 1822	0.285714	0.0588235
71779	57692	genus	Sirobasidium					0.25	0.147059
71780	71779	species	Sirobasidium magnum				Sirobasidium magnum Boedijn, 1934	0.0238095	0
71913	5351	genus	Resupinatus					0	0.0882353
71937	71934	genus	Entoloma					0.047619	0
72117	5338	family	Omphalotaceae					0.0227273	0
72305	40111	genus	Dirina					0	0.0294118
72306	72305	species	Dirina catalinariae					0	0.0294118
73565	73564	species	Aporospora terricola					0	0.0294118
74721	1667166	genus	Stachybotrys					0	0.0294118
75749	75748	species	Glomerobolus gelineus					0.0909091	0.147059
76657	5178	family	Dermateaceae					0.0454545	0.0588235
76773	55193	species	Malassezia globosa					0.0227273	0
78060	157822	family	Parmeliaceae		Alectoriaceae;Anziaceae			0.181818	0.294118
78141	37240	genus	Oidiodendron					0.0454545	0
79807	292576	family	Coniochaetaceae					0.659091	0.5
79808	79807	genus	Coniochaeta		Lecythophora			0.659091	0.441176
80628	452334	family	Atheliaceae					0.0227273	0
81064	5303	family	Meruliaceae		Climacodontaceae;Phlebiaceae			0.0454545	0.117647
81065	1931355	genus	Gloeoporus					0.0454545	0.0294118
82105	43219	genus	Cladophialophora					0.318182	0.235294
82268	82267	species	Hyaloraphidium curvatum					0	0
84755	1804794	species	Kalmanozyma fusiformata		Candida fusiformata;Pseudozyma fusiformata		Kalmanozyma fusiformata (Buhagiar) Q.M. Wang, F.Y. Bai, Begerow & Boekhout, 2016	0	0.0294118
86830	5277	species	Leucosporidium fragarium		Candida fragaria;Leucosporidiella fragaria;Rhodotorula fragaria;Rhodotorula fragariae;Torulopsis fragaria;Torulopsis fragariae;Vanrija fragaria;Vanrijia fragaria		Leucosporidiella fragaria (J.A. Barnett & Buhagiar) J.P. Samp., 2003;Leucosporidium fragarium (J.A. Barnett and Buhagiar) V. de Garcia, M. A. Coelho, T. Maia, L. H. Rosa, A. M. Vaz, C. A. Rosa, J. P. Sampaio, P. Gonalves, M. R. van Broock and D. Libkind, 2015;Torulopsis fragariae J.A. Barnett & Buhagiar, 1971	0.0227273	0.0882353
88639	388283	order	Pertusariales					0.047619	0
88646	1302176	family	Teloschistaceae					0.0681818	0.0294118
88746	157821	family	Acarosporaceae					0.431818	0.470588
88747	88746	genus	Acarospora					0.409091	0.441176
89443	4751	no rank	unclassified Fungi					0.75	0.941176
90676	5426	genus	Bovista					0	0.0294118
90886	155616	order	Filobasidiales					0.954545	1
91806	1520784	genus	Trapelia					0.0454545	0
91984	106022	species	Sakaguchia lamellibrachiae		Rhodotorula lamellibrachiae		Sakaguchia lamellibrachiae (Nagah., Hamam., Nakase & Horikoshi) Q.M. Wang, F.Y. Bai, M. Groenew. & Boekhout, 2015	0.214286	0.264706
92860	451868	order	Pleosporales					0.954545	1
92862	92860	no rank	unclassified Pleosporales					0.727273	0.764706
92987	129384	genus	Phaeotheca					0.0227273	0.0588235
93133	134362	family	Mycosphaerellaceae					0.772727	0.794118
95331	34379	genus	Pseudeurotium					0.0227273	0.0294118
95729	28556	genus	Stemphylium					0.886364	1
97971	1898439	genus	Periconia					0.25	0.176471
100025	191554	family	Hysteriaceae					0.227273	0.205882
100032	715298	genus	Keissleriella					0.636364	0.529412
100035	100034	species	Massariosphaeria phaeospora					0	0.0294118
101853	76657	genus	Pezicula					0.0238095	0.0294118
103376	452342	family	Stereaceae					0.047619	0
103886	261460	family	Chaetosphaeriaceae					0.681818	0.529412
103887	5125	family	Bionectriaceae		anamorphic Bionectriaceae			0.181818	0.0882353
104247	452226	genus	Candelariella					0	0.0588235
104351	104350	genus	Crepidotus					0	0.0294118
104397	683158	genus	Epicoccum		Cerebella			0.636364	0.705882
105767	5215	genus	Tremella					0.795455	0.823529
105996	1611264	genus	Occultifur				Occultifur Oberw., 1990	0.0238095	0
106001	1798813	species	Buckleyzyma armeniaca		Rhodotorula armeniaca		Buckleyzyma armeniaca (R.G. Shivas & Rodr. Mir.) Q.M. Wang, F.Y. Bai, M. Groenew. & Boekhout, 2015	0.0454545	0.176471
106008	256806	species	Curvibasidium cygneicollum		Candida fujisanensis;Torulopsis fujisanensis;Vanrija fujisanensis		Curvibasidium cygneicollum J.P. Samp., 2004	0.452381	0.441176
106010	1801565	species	Sampaiozyma ingeniosa		Candida ingeniosa;Rhodotorula ingeniosa;Torulopsis ingeniosa;Vanrija ingeniosa;Vanrijia ingeniosa		Rhodotorula ingeniosa (Di Menna) Arx & Weijman, 1979;Sampaiozyma ingeniosa (Di Menna) Q.M. Wang, F.Y. Bai, M. Groenew. & Boekhout, 2015;Torulopsis ingeniosa Di Menna, 1958	0.833333	0.5
106019	1803523	species	Yunzhangia sonckii		Candida sonckii;Rhodotorula sonckii;Vanrija sonckii;Vanrijia sonckii		Candida sonckii Hopsu-Havu, Tunnela & Yarrow, 1978;Rhodotorula sonckii (Hopsu-Havu, Tunnela & Yarrow) Rodr. Mir. & Weijman, 1988;Yunzhangia sonckii (Hopsu-Havu, Tunnela & Yarrow) Q.M. Wang, F.Y. Bai, M. Groenew. & Boekhout, 2015	0.309524	0.0882353
106022	460509	genus	Sakaguchia					0.272727	0.352941
106023	106022	species	Sakaguchia dacryoidea		Rhodosporidium dacryoideum;Rhodosporidium dacryoidum		Sakaguchia dacryoidea (Fell, I.L. Hunter & Tallman) Y. Yamada, K. Maeda & Mikata, 1994	0.0681818	0.0588235
106263	37989	family	Apiosporaceae					0.0714286	0
106814	4496	species	Avena macrostachya				Avena macrostachya Balansa ex Coss. & Durieu	0	0.0588235
109764	109763	species	Harpochytrium sp. JEL94					0.0454545	0
109893	1134080	genus	Powellomyces					0	0.0588235
110564	103887	genus	Clonostachys					0.0227273	0.0294118
110586	29865	species	Nectriopsis violacea					0.166667	0.0294118
110618	5125	family	Nectriaceae					0.863636	0.735294
110844	5178	family	Rutstroemiaceae					0.409091	0.176471
111621	78060	genus	Xanthoparmelia		Chondropsis;Neofuscelia;Paraparmelia			0.047619	0.0294118
112072	112071	species	Naohidea sebacea		Dacrymyces sebaceus		Dacrymyces sebaceus Berk. & Broome, 1871;Naohidea sebacea (Berk. & Broome) Oberw., 1990	0.047619	0
112133	5181	genus	Crocicreas		Cyathicula			0.0454545	0.0588235
112488	744530	genus	Dissoconium					0.0227273	0.117647
112497	93133	genus	Ramularia					0.159091	0.147059
114230	152648	genus	Nigrospora					0.113636	0.117647
115234	110618	genus	Cosmospora					0	0.0588235
116791	111584	species	Buellia disciformis					0	0.0294118
116799	50934	genus	Phaeophyscia				Phaeophyscia Moberg, 1977	0	0.0588235
117058	71934	genus	Rhodocybe					0.0227273	0
117544	5117	genus	Cytospora					0.25	0.529412
117816	34479	genus	Kochiomyces					0	0.0294118
117818	4815	species	Spizellomyces dolichospermus					0.0454545	0
118273	1406929	genus	Lecophagus					0.0238095	0
121621	1424649	genus	Phyllosticta					0.0681818	0.0588235
124095	39941	species	Mycocalicium victoriae					0	0.0294118
125369	221678	genus	Paraphaeosphaeria					0.0681818	0
131324	93133	genus	Pseudocercospora					0.0454545	0
131338	37990	genus	Anthostomella					0.0952381	0
132098	33198	species	Drechslera campanulata					0.409091	0.294118
134362	451867	order	Capnodiales					0.954545	1
134502	1769459	genus	Chaetomella					0.0238095	0
136167	46635	species	Hormonema sp. F-054,258					0.409091	0.5
136422	5263	species	Uromyces striatus					0.0238095	0
138063	1812776	genus	Seiridium					0.0454545	0.0294118
139131	5304	genus	Sistotrema					0.0227273	0.0294118
139133	1229510	genus	Sistotremastrum					0.0454545	0
139134	139133	species	Sistotremastrum niveocremeum					0.0238095	0
139159	1931355	genus	Byssomerulius					0	0.0294118
139171	139141	species	Tubulicrinis sp. GEL5046					0	0.0882353
139231	33198	species	Drechslera nobleae					0.0227273	0.176471
143937	76657	genus	Neofabraea					0.0227273	0
146292	146291	family	Verrucariaceae		Mastodiaceae		Mastodiaceae Zahlbr. 1907;Verrucaria Schrad., 1794	0.113636	0.0882353
147498	92860	no rank	Pleosporales incertae sedis					0.727273	0.647059
147538	716545	subphylum	Pezizomycotina		Euascomycota			0.954545	1
147539	715962	class	Arthoniomycetes					0.727273	0.647059
147541	715962	class	Dothideomycetes					0.954545	1
147545	716546	class	Eurotiomycetes					0.886364	0.794118
147547	716546	class	Lecanoromycetes					0.727273	0.823529
147548	715989	class	Leotiomycetes					0.818182	0.882353
147550	715989	class	Sordariomycetes					0.954545	1
150498	147550	no rank	unclassified Sordariomycetes					0.363636	0.176471
152622	37990	genus	Muscodor					0	0.0294118
154566	1344078	genus	Marchandiomyces					0.0681818	0.0588235
155415	110158	genus	Monosporascus					0.0227273	0.0294118
155416	155415	species	Monosporascus cannonballus					0	0.0294118
155616	5302	class	Tremellomycetes		Heterobasidiomycetes			0.977273	1
155619	5302	class	Agaricomycetes					0.727273	0.794118
156596	1229510	genus	Trechispora					0.0227273	0.0294118
157253	157252	species	Muribasidiospora indica					0	0.0294118
158045	1618111	genus	Phaeomoniella					0.272727	0.411765
159075	162454	genus	Acremonium					0.166667	0.0588235
159638	147548	no rank	unclassified Leotiomycetes					0.227273	0.117647
159639	5178	no rank	Helotiales incertae sedis					0.119048	0
159987	147541	no rank	Dothideomycetes incertae sedis					0.795455	0.823529
160893	160892	species	Ceratosebacina calospora					0	0.0294118
162405	1910953	genus	Bartalinia					0.0454545	0.0294118
162418	54958	genus	Seimatosporium					0.227273	0.235294
162454	5125	no rank	Hypocreales incertae sedis					0.386364	0.382353
162475	452283	order	Microstromatales					0.0909091	0.147059
162477	162475	no rank	Microstromatales incertae sedis					0.0681818	0.0294118
162481	29000	class	Microbotryomycetes		Microbotryomycetidae			0.954545	0.941176
163257	45147	genus	Vaginatispora					0.119048	0.0882353
164535	129384	genus	Tetracladium					0.818182	0.558824
165440	1884640	genus	Dioszegia					0.886364	0.823529
165790	432006	family	Erythrobasidiaceae				Erythrobasidiaceae Denchev 2009	0.454545	0.352941
171627	5506	no rank	Fusarium fujikuroi species complex		Gibberella fujikuroi complex			0	0
172190	1535530	genus	Coniella		Pilidiella			0.227273	0.176471
172618	78060	genus	Hypotrachyna					0.0714286	0.0588235
173137	40593	species	Peziza michelii					0	0.0588235
173150	5186	genus	Ruhlandiella					0.0454545	0.0882353
175500	66029	species	Microlaena avenacea		Ehrharta diplax		Ehrharta diplax F.Muell.;Microlaena avenacea (Raoul) Hook.f.	0	0.0588235
175855	40424	genus	Fuscoporia					0	0.0294118
176137	5186	no rank	unclassified Pezizaceae		unclassified Terfeziaceae			0.0227273	0
177194	221903	genus	Hyphozyma					0.0238095	0
178737	37990	genus	Arthroxylaria					0	0.0294118
181926	5320	species	Pleurotus australis					0	0.0294118
184430	184208	genus	Coprinellus					0.113636	0.117647
184431	184208	genus	Coprinopsis					0.047619	0.0294118
187248	1171044	genus	Harknessia					0.409091	0.235294
188545	188544	species	Demodex canis				Demodex canis Leydig, 1859	0.047619	0.0294118
189359	37989	no rank	Xylariales incertae sedis					0.818182	0.852941
189450	1581159	genus	Papiliotrema					0.840909	0.5
190626	5296	species	Puccinia malvacearum					0.0227273	0
195053	103376	genus	Megalocystidium					0.0238095	0
195797	195796	species	Ramalea cochleata					0	0.0294118
203525	34418	genus	Cystobasidium					0.409091	0.264706
209472	209470	species	uncultured Pleosporales		uncultured ectomycorrhiza (Pleosporales)			0	0.0294118
209473	147541	no rank	unclassified Dothideomycetes					0.431818	0.441176
218105	399129	no rank	Cryphonectria-Endothia species complex					0.0238095	0
218126	426519	genus	Quambalaria					0.0227273	0.117647
220344	5206	species	Cryptococcus sp. Pro94-Y57					0.166667	0.117647
220671	5021	no rank	Leptosphaeria maculans species complex					0.227273	0.176471
220672	220671	species	Leptosphaeria biglobosa					0.0714286	0.0588235
221670	715340	family	Cucurbitariaceae					0.25	0.294118
221678	1255046	family	Didymosphaeriaceae		Montagnulaceae			0.909091	0.911765
221900	47166	family	Cudoniaceae					0.0238095	0
221903	147548	no rank	Leotiomycetes incertae sedis					0.136364	0.0588235
222543	147550	subclass	Hypocreomycetidae					0.931818	1
222544	147550	subclass	Sordariomycetidae					0.954545	0.911765
223428	1520784	genus	Xylographa					0.0227273	0
223899	5181	genus	Tricladium					0.0454545	0.0294118
224419	147498	genus	Shiraia					0.0454545	0.0294118
226117	5531	species	Myrothecium gramineum		Xepiculopsis graminea			0.0454545	0.0588235
226122	5531	species	Myrothecium lachastrae					0.0454545	0.0294118
226991	1341112	genus	Cyphellophora					0.181818	0.0882353
227067	221678	genus	Spegazzinia					0.204545	0.205882
228211	5020	genus	Phaeosphaeriopsis					0.0681818	0.0588235
228943	228942	species	Limonomyces roseipellis					0.0952381	0.0882353
228944	228942	species	Limonomyces culmigenus					0.204545	0.147059
231212	162481	order	Leucosporidiales					0.613636	0.441176
231213	162481	order	Sporidiobolales		Sporidiaceae			0.75	0.823529
232773	56757	genus	Absconditella					0.0238095	0
237031	78060	genus	Canoparmelia					0.0238095	0
237584	668547	genus	Teratosphaeria					0.363636	0.588235
237593	470130	species	Catenulostroma elginense		Trimmatostroma elginense			0.0227273	0.0294118
243023	34397	genus	Pochonia					0	0.0294118
245174	148959	species	Wallemia ichthyophaga		Wallemia ichthiophaga		Wallemia ichthyophaga Johan-Olsen	0	0.0294118
248099	248098	species	Asterothyrium longisporum					0.261905	0.0588235
252155	42302	genus	Schizothecium					0.261905	0.176471
252690	109893	species	Powellomyces sp. EA					0	0.0294118
255703	203525	species	Cystobasidium lysinophilum		Rhodotorula lysiniphila;Rhodotorula lysinophila		Cystobasidium lysinophilum (Nagahama, Hamamoto, Nakase & Horikoshi) Yurkov, Kachalkin, Daniel, Groenewald, Libkind, de Garcia, Zalar, Gouliamova, Boekhout & Begerow, 2014	0.047619	0.0294118
256806	162483	genus	Curvibasidium					0.452381	0.441176
257870	1890244	species	Saitozyma paraflava		Cryptococcus paraflavus;Saitozyma paraflavus		Cryptococcus paraflavus Golubev & Sampaio	0.272727	0.0588235
259858	746524	genus	Arctotheca				Arctotheca J.C.Wendl.	0.159091	0
261096	451453	genus	Kappamyces					0.0227273	0.117647
265084	718227	genus	Preussia				Preussia Fuckel, 1867	0.454545	0.470588
266071	1769459	genus	Pilidium					0.0714286	0.117647
267215	1909749	species	Genolevuria amylolytica		Cryptococcus amylolyticus		Cryptococcus amylolyticus A. Fonseca, J. Inacio & Spenc.-Mart., 2005;Genolevuria amylolytica (A. Fonseca, J. Inacio & Spenc.-Mart.) X.Z. Liu, F.Y. Bai, M. Groenew. & Boekhout, 2016	0.159091	0.0588235
267217	1909749	species	Genolevuria armeniaca		Cryptococcus armeniacus		Genolevuria armeniaca (A. Fonseca & J. Inacio) X.Z. Liu, F.Y. Bai, M. Groenew. & Boekhout, 2015	0.318182	0.294118
268179	1851470	genus	Cryptotrichosporon					0.159091	0.205882
268180	268179	species	Cryptotrichosporon anacardii					0.113636	0.176471
269607	237584	species	Teratosphaeria mexicana		Mycosphaerella mexicana			0.0681818	0.0588235
271836	271835	species	Acarosporina microspora		Schizoxylon microsporum		Schizoxylon microsporum R.W. Davidson & R.C.Lorenz	0	0.0294118
271885	154566	species	Marchandiomyces lignicola					0.047619	0.0294118
276832	45131	genus	Dothiorella					0	0.0294118
278090	147544	genus	Teichospora		Floricola;Misturatosphaeria;Ramusculicola			0.159091	0.352941
281250	134362	family	Schizothyriaceae					0.0227273	0
281846	118273	species	Lecophagus sp. ATCC 56071					0.0238095	0
284134	162454	genus	Sarocladium					0.0454545	0.0588235
285719	13786	no rank	unclassified Trebouxia		unclassified Trebouxia photobionts			0.227273	0.147059
285810	221670	genus	Pyrenochaeta					0.0909091	0.117647
286399	88746	genus	Polysporina					0	0.0294118
286400	286399	species	Polysporina simplex					0	0.0294118
286401	88746	genus	Sarcogyne					0.0227273	0.0294118
286661	286660	species	Peltaster fructicola					0.0227273	0.0294118
290882	1255046	family	Massarinaceae					0.431818	0.323529
291227	152655	genus	Appendicheirospora					0.0238095	0
291228	291227	species	Appendicheirospora graminicola					0.0238095	0
291363	474943	genus	Lecanicillium					0.0227273	0
292188	292187	species	Carestiella socia					0.0714286	0.0588235
292576	222544	order	Coniochaetales					0.659091	0.5
296781	28983	genus	Torrendiella					0.0227273	0
296783	54683	species	Lanzia allantospora					0.0454545	0.0588235
297313	355688	order	Sebacinales					0.0681818	0.0294118
306876	93133	genus	Readeriella					0.136364	0.205882
307341	89443	species	fungal sp. TRN254					0.0227273	0.205882
307351	89443	species	fungal sp. TRN270					0.0227273	0
307369	89443	species	fungal sp. TRN436					0.0227273	0.0294118
307370	1664131	species	Ramimonilia apicalis				Ramimonilia apicalis Stielow & Quaedvlieg, 2015	0.0909091	0.0588235
307390	89443	species	fungal sp. TRN458					0.0227273	0.0294118
312146	1851509	species	Naganishia randhawae		Cryptococcus randhawai;Cryptococcus randhawii		Cryptococcus randhawai Z.U. Khan, Suh. Ahmad, F. Hagen, Fell, Kowshik, Chandy & Boekhout, 2010;Naganishia randhawae (Z.U. Khan, S.O. Suh. Ahmad, F. Hagen, Fell, Kowshik, Chandy & Boekhout) X.Z. Liu, F.Y. Bai, M. Groenew. & Boekhout,	0.238095	0.0882353
314120	1406929	genus	Vermispora					0	0.0294118
314149	43216	genus	Acanthostigma					0	0.0882353
316340	34395	no rank	unclassified Chaetothyriales					0.409091	0.352941
318751	45153	species	Westerdykella ornata					0	0.0294118
318860	715298	genus	Pleurophoma					0.159091	0.147059
325665	45153	species	Westerdykella nigra					0.0227273	0
329018	81065	species	Gloeoporus dichrous					0.0227273	0
332221	332217	species	Neochlorosarcina negevensis		Chlorosarcinopsis negevensis		Chlorosarcinopsis negevensis I.Friedmann & R.Ocampo-Paus;Neochlorosarcina negevensis (I.Friedmann & R.Ocampo-Paus) S.Watanabe, 1983	0.0909091	0.0588235
333827	333826	species	Diptera environmental sample					0.0227273	0.0294118
336780	110846	genus	Pseudombrophila		Fimaria			0.0238095	0
337359	21555	species	Erodium carolinianum				Erodium carolinianum Aldasoro, C.Navarro, P.Vargas, L.Saez & Aedo	0	0.0294118
344958	43219	genus	Cladoriella					0	0.117647
344959	344958	species	Cladoriella eucalypti					0	0.0882353
355688	155619	no rank	Agaricomycetes incertae sedis					0.681818	0.705882
356988	5020	genus	Sclerostagonospora					0.0227273	0.0294118
361670	361669	species	Hemiflagellochloris kazakhstanica					0	0.0294118
364733	364710	species	Endocarpon pusillum					0.0454545	0.0588235
365329	1909748	species	Fonsecazyma mujuensis		Cryptococcus mujuensis		Cryptococcus mujuensis K.S. Shin & Y.H. Park 2006;Fonsecazyma mujuensis (K.S. Shin & Y.H. Park) X.Z. Liu, F.Y. Bai, M. Groenew. & Boekhout, 2015	0.113636	0.0588235
366620	89802	species	Hyphoderma orphanellum					0.0238095	0.0294118
366629	68802	species	Hyphodontia subalutacea		Hyphodontia sp. 1 LR-2015			0	0.0294118
371108	1450292	genus	Saccharata				Saccharata Denman & Crous	0.25	0.264706
371113	45131	genus	Tiarosporella					0.0909091	0.0588235
371114	371113	species	Tiarosporella graminis				Tiarosporella graminis (Piroz. & Shoemaker) Nag Raj	0.0681818	0.0294118
385117	89443	species	fungal endophyte sp. SS-1353					0.0681818	0.117647
388283	1520881	subclass	Ostropomycetidae					0.409091	0.382353
388435	1520881	subclass	Lecanoromycetidae					0.431818	0.411765
391237	5304	genus	Peniophorella					0.0714286	0.0294118
394858	1909749	species	Genolevuria bromeliarum		Cryptococcus bromeliarum		Cryptococcus bromeliarum M. F. Landell & P. Valente 2009;Genolevuria bromeliarum (Landell & P. Valente) X.Z. Liu, F.Y. Bai, M. Groenew. & Boekhout, 2016	0.0714286	0
396331	5303	family	Phanerochaetaceae		Bjerkanderaceae;Hapalopilaceae			0.0454545	0.117647
404203	89443	species	soil fungal sp. ANG34					0.0227273	0
405928	5186	genus	Hydnobolites					0.047619	0
406764	47218	species	Saccobolus dilutellus					0.0714286	0
407088	407949	species	Fusculina eucalypti				Fusculina eucalypti Crous & Summerell, 2009	0.136364	0.147059
407092	407091	species	Plectosphaera eucalypti		Phyllachora eucalypti		Phyllachora eucalypti (Speg.) Petr.;Plectosphaera eucalypti (Cooke & Massee) H.J.Swart	0.738095	0.823529
407951	45131	genus	Neofusicoccum					0.047619	0.0588235
407953	189359	genus	Phlogicylindrium					0.0238095	0
408669	470111	species	Sympoventuria capensis					0	0.0294118
410823	89443	species	fungal endophyte		Fungal endophyte sp1			0.0909091	0.0294118
411563	36064	genus	Minimedusa					0.113636	0
411704	154566	species	Marchandiomyces buckii					0.0238095	0
412498	139971	species	Menispora sp. EXP0529F					0	0.0294118
414539	5583	species	Exophiala crusticola					0.0454545	0
422685	221678	no rank	unclassified Didymosphaeriaceae					0.0227273	0.0882353
424532	5206	species	Cryptococcus sp. FYB-2007a					0.0714286	0.0588235
425286	45426	species	ascomycete sp. CH-Aa18					0.0227273	0
430999	1233474	genus	Knufia					0.477273	0.294118
431023	205932	genus	Phacidiella					0.0227273	0.0294118
431030	431023	species	Phacidiella eucalypti					0.0238095	0
432005	29000	class	Cystobasidiomycetes					0.818182	0.705882
432006	432005	order	Erythrobasidiales					0.5	0.352941
434363	100034	species	Massariosphaeria roumeguerei					0.452381	0.529412
438769	42303	species	Cercophora acanthigera					0	0.0294118
445181	668547	genus	Phaeothecoidea					0.522727	0.588235
446943	112497	species	Ramularia sp. KACC 42532					0.159091	0.117647
451442	451435	order	Rhizophydiales					0.181818	0.117647
451864	4751	subkingdom	Dikarya					1	1
451867	147541	subclass	Dothideomycetidae					0.954545	1
451869	159987	order	Botryosphaeriales					0.636364	0.558824
451870	147545	subclass	Chaetothyriomycetidae					0.863636	0.794118
452226	452225	family	Candelariaceae					0.0454545	0.0882353
452227	1520791	order	Umbilicariales					0	0.0294118
452283	452284	class	Exobasidiomycetes					0.0909091	0.264706
452338	355688	order	Corticiales					0.477273	0.352941
452563	134362	family	Cladosporiaceae		Davidiellaceae		Cladosporiaceae (Sacc.) Nann., 1934	0.954545	1
453767	5506	no rank	Fusarium dimerum species complex					0.0714286	0.0588235
456999	1322061	species	Rhizoctonia solani		Rhizoctonia praticola			0.0227273	0
460509	432005	no rank	Cystobasidiomycetes incertae sedis					0.636364	0.676471
460848	104249	species	Candelaria pacifica					0.047619	0.0588235
464692	1535529	genus	Chaetospermum					0.0454545	0.0294118
464696	464695	species	Giulia tenuis					0	0.0294118
467151	1167810	species	Betamyces americaemeridionalis				Betamyces americaemeridionalis Letcher 2012	0.0238095	0
470018	452563	genus	Rachicladosporium					0.636364	0.764706
470063	452563	genus	Toxicocladosporium					0.0909091	0.176471
470080	37937	species	Ramichloridium apiculatum					0.0227273	0.0588235
470099	470097	species	Radulidium sp. CBS 115704					0.113636	0.117647
470111	1111112	genus	Sympoventuria					0.0454545	0.0882353
470130	668547	genus	Catenulostroma					0.0454545	0.0588235
470439	237462	species	Anungitopsis speciosa					0.047619	0.0294118
470456	1341135	species	Camptophora hylomeconis		Cyphellophora hylomeconis		Camptophora hylomeconis (Crous, de Hoog & H.D. Shin) Reblova & Unter. 2013	0.0238095	0
474943	5125	family	Cordycipitaceae					0.113636	0.0882353
483470	43220	species	Capronia sp. 97004c					0	0.0294118
486728	194286	order	Urostylida					0	0.0294118
487628	1582909	genus	Pleiochaeta					0.0909091	0.0294118
490731	1884633	genus	Kwoniella					0.047619	0.176471
502745	651026	species	Endosporium populi-tremuloidis					0.309524	0.176471
509727	93809	genus	Jattaea					0.0227273	0.0294118
511707	5206	species	Cryptococcus sp. SJ11L08					0.0238095	0
515146	134362	no rank	unclassified Capnodiales					0.181818	0.147059
523340	5043	species	Acremonium sp. BCC 14080					0.0909091	0.0294118
531437	237584	species	Teratosphaeria sp. CPC 13963					0.0681818	0.147059
531857	100025	genus	Gloniopsis					0.0952381	0.0882353
531859	603431	genus	Glonium					0.0238095	0
532535	89443	species	soil fungal sp. DM2-279					0.047619	0
535763	1615853	species	Cystobasidiomycetes sp. BI218					0.0952381	0.0588235
565392	129384	genus	Allantophoma					0.047619	0
565398	5020	genus	Chaetosphaeronema					0.159091	0
565407	565406	species	Pseudorobillarda phragmitis					0.522727	0.294118
565434	242511	species	Selenophoma linicola					0.047619	0.0882353
566087	405928	species	Hydnobolites cerebriformis					0.047619	0
570524	45148	species	Lophiostoma sp. CBS 123543					0.0238095	0
575986	153036	species	Helotiaceae sp. 795_3_CZ02					0.0238095	0
603431	715341	family	Gloniaceae					0.0681818	0.0588235
604195	115784	genus	Cyberlindnera		Lindnera			0	0.0294118
610139	13000	species	Chalara siamense					0.0238095	0
634182	316340	species	Chaetothyriales sp. TRN1		Chaetothyriales sp.TRN1			0.142857	0.176471
639021	222544	order	Magnaporthales				Magnaporthales Thongkantha, Vijaykrishna & K.D. Hyde 2009	0.0454545	0.0294118
644758	71662	species	Monodictys sp. 148					0	0.0588235
648923	33194	species	Bipolaris sp. HSAUP074449					0.0454545	0
652292	150231	species	Pezizomycotina sp. 11120					0.0227273	0
652430	147549	no rank	unclassified Pezizomycetes					0.136364	0.0588235
652431	5206	species	Cryptococcus sp. ZIM 2300					0.0238095	0
657374	105767	species	Tremella aff. globispora IMUFRJ 52033					0.0227273	0
663566	716546	class	Geoglossomycetes				Geoglossomycetes Zheng Wang, C.L. Schoch & Spatafora 2009	0.0238095	0
668547	134362	family	Teratosphaeriaceae					0.818182	0.911765
673153	189359	genus	Bagadiella					0.613636	0.617647
679529	237584	species	Teratosphaeria crispata				Teratosphaeria crispata Carnegie 2011	0.0227273	0
683158	715340	family	Didymellaceae				Didymellaceae Gruyter, Aveskamp & Verkley 2009	0.931818	1
687987	159075	species	Acremonium curvulum					0.047619	0
703475	221678	genus	Tremateia					0.0238095	0.0294118
703494	703493	species	Mauritiana rhizophorae				Mauritiana rhizophorae Poonyth, K.D. Hyde, Aptroot & Peerally 2000	0.0238095	0
703499	147569	species	Myriangium hispanicum				Myriangium hispanicum J.B. Martnez 1931	0	0.0294118
706557	1508290	species	Neodevriesia lagerstroemiae		Capnodiales sp. WQ-2013m;Devriesia lagerstroemiae		Devriesia lagerstroemiae Crous & M.J. Wingf. 2009;Neodevriesia lagerstroemiae (Crous & M.J. Wingf.) Crous, 2015	0.136364	0.147059
708513	34448	species	Marasmius sp. RR-2010d					0	0.0294118
714941	714940	genus	Tetraplosphaeria					0.0227273	0
715292	92860	family	Amniculicolaceae				Amniculicolaceae Yin. Zhang, C.L. Schoch, J. Fourn., Crous & K.D. Hyde 2009	0.047619	0
715298	1255046	family	Lentitheciaceae				Lentitheciaceae Yin. Zhang, C.L. Schoch, J. Fourn., Crous & K.D. Hyde 2009	0.795455	0.705882
715340	92860	suborder	Pleosporineae					0.954545	1
715989	716546	no rank	sordariomyceta					0.954545	1
716545	4890	no rank	saccharomyceta					0.954545	1
716546	147538	no rank	leotiomyceta					0.954545	1
718227	55176	no rank	Preussia/Sporomiella species complex					0.454545	0.5
718241	718228	species	Sporormiella megalospora		Preussia megalospora;Sporormia megalospora			0.0227273	0.0294118
742177	584654	species	Anteholosticha monilata		Anteholosticha sp. ZLv-2015b;Anteholosticha sp. Zlv-2015		Anteholosticha monilata (Kahl, 1928) Berger, 2003 in Berger (2006, p. 297)	0	0.0294118
744530	134362	family	Dissoconiaceae				Dissoconiaceae Crous & de Hoog 2010	0.0454545	0.176471
744552	100051	species	Delitschia anisomera				Delitschia anisomera Luck-Allen & Cain 1975	0.0714286	0
749461	683158	genus	Boeremia					0.190476	0.117647
754277	89443	species	fungal sp. KRP11					0	0.0294118
757955	89443	species	fungal sp. ARIZ AZ0512					0.0227273	0
758395	89443	species	fungal sp. ARIZ AZ1016					0.113636	0.0588235
758403	89443	species	fungal sp. ARIZ AZ1029					0.0909091	0.147059
758427	89443	species	fungal sp. ARIZ AZ1063					0	0.0294118
761740	89443	species	fungal sp. DA-S-2					0.159091	0.0588235
766758	766764	genus	Schwanniomyces				Schwanniomyces Klocker 1909	0	0.0294118
766764	4892	family	Debaryomycetaceae				Debaryomycetaceae Kurtzman et M. Suzuki 2010	0.0454545	0.0882353
767018	5114	family	Diaporthaceae				Diaporthaceae Hohn. ex Wehm. 1926	0.522727	0.294118
796413	314149	species	Acanthostigma multiseptatum				Acanthostigma multiseptatum Promputtha & A.N. Mill. 2010	0	0.0294118
857077	79808	species	Coniochaeta sp. CHTAR121					0.0714286	0.0882353
859500	39180	species	Corticium boreoroseum				Corticium boreoroseum Boidin & Lanq. 1983	0.0238095	0
861973	89443	species	fungal sp. mh2223.6					0.113636	0.0588235
872982	412481	species	Asteromella pistaciarum				Asteromella pistaciarum Bremer & Petr. 1947	0.0681818	0.147059
879691	286563	species	Devriesia sp. NG_p52					0.0227273	0.0294118
886458	652430	species	Pezizomycetes sp. WF148					0.0454545	0
942743	412475	species	Microbotryomycetes sp. TMS-2011					0	0.0294118
947208	105767	species	Tremella lobariacearum				Tremella lobariacearum Diederich & M.S. Christ. 1996	0	0.0294118
980150	316340	species	Chaetothyriales sp. M-Cre1-1					0.0227273	0
980695	165440	species	Dioszegia sp. YM24626					0.363636	0.176471
981071	3700	tribe	Brassiceae				Brassiceae DC., 1821	0.318182	0.147059
990923	38240	species	Basidiomycota sp. zzz1735					0	0.0294118
997780	37839	species	Dothideales sp. 1 NF-2011					0.452381	0.588235
998209	172614	species	Flavoparmelia citrinescens		Parmelia citrinescens		Flavoparmelia citrinescens (Gyelnik) O. Blanco, A. Crespo & Elix 2010;Parmelia citrinescens Gyelnik 1938	0.0714286	0.147059
1041186	105767	species	Tremella phaeophysciae				Tremella phaeophysciae Diederich & M.S. Christ. 1996	0	0.0294118
1046566	3618	species	Rumex hypogaeus		Emex australis		Emex australis Steinh.;Rumex hypogaeus T.M.Schust. & Reveal	0.0681818	0
1047167	93133	genus	Zymoseptoria					0.113636	0.0882353
1049287	5583	species	Exophiala capensis					0.0909091	0.176471
1049288	467980	species	Penidiella aggregata					0.0681818	0.0294118
1051142	1051141	species	Camarosporula persooniae		Hendersonia persooniae		Camarosporula persooniae (Henn.) Petr.;Hendersonia persooniae Henn.	0	0.0294118
1052096	5498	species	Cladosporium halotolerans				Cladosporium halotolerans Zalar, de Hoog & Gunde-Cimerman 2007	0.0227273	0.0294118
1053258	110618	genus	Thelonectria					0.0238095	0
1053489	451869	no rank	unclassified Botryosphaeriales					0.295455	0.264706
1078995	89443	species	fungal sp. BAN-D					0.0454545	0
1084402	89443	species	fungal sp. 347A TTMM-2011					0.0227273	0
1091488	5533	species	Rhodotorula sp. 2 MAC-2011b					0.0227273	0.0294118
1093203	265079	species	Coccomyces proteae					0.340909	0.235294
1093212	1508290	species	Neodevriesia capensis		Teratosphaeria capensis		Neodevriesia capensis (Crous) Crous, 2015;Teratosphaeria capensis Crous 2011	0.0681818	0.235294
1105073	81067	species	Chytridiomycota sp. LLME1_1 PML-2011i					0.0952381	0.0588235
1108623	89443	species	fungal sp. CZ-2011j					0.0227273	0.0294118
1111111	159987	order	Venturiales				Venturiales Yin. Zhang, C.L. Schoch & K.D. Hyde 2011	0.318182	0.352941
1111112	1111111	family	Sympoventuriaceae				Sympoventuriaceae Yin. Zhang, C.L. Schoch & K.D. Hyde	0.159091	0.264706
1120191	5533	species	Rhodotorula sp. M14					0.340909	0.147059
1122585	314149	species	Acanthostigma chiangmaiense		Acanthostigma chiangmaiensis		Acanthostigma chiangmaiense Boonmee & K.D. Hyde 2011	0	0.0588235
1129334	467802	species	Rhizophydiales sp. 1 MV-2011					0.0909091	0.0294118
1130102	71598	subfamily	Graphidoideae				Graphidoideae Rivas Plata, Lcking and Lumbsch 2012	0.0238095	0
1130689	138063	species	Seiridium banksiae				Seiridium banksiae Crous & Summerell 2011	0.0238095	0
1131624	5042	family	Thermoascaceae				Thermoascaceae Apinis 1967	0.0227273	0.0294118
1150193	165440	species	Dioszegia sp. YM24421					0.238095	0.0294118
1179179	1084655	species	Delastria rosea				Delastria rosea Tul. & C. Tul. 1843	0.047619	0.0294118
1179690	5543	species	Trichoderma sp. KBS0814F					0.0681818	0.0294118
1180586	209473	species	Dothideomycetes sp. genotype 252					0.0909091	0.147059
1180614	209473	species	Dothideomycetes sp. genotype 376					0.0227273	0
1187120	714650	species	cf. Herpothallon sp. BRY C56027					0.0227273	0
1196446	103886	genus	Dinemasporium					0.636364	0.470588
1196454	103886	genus	Pseudolachnea					0.136364	0.0882353
1196455	1196454	species	Pseudolachnea fraxini				Pseudolachnea fraxini Crous 2012	0.136364	0.0882353
1198470	1198468	species	Entylomatales sp. RP					0	0.0588235
1198983	2170432	genus	Disculoides					0.0238095	0.0588235
1208471	68764	species	Geastrum sp. TNS KH-AUS10-72					0.0227273	0
1208924	1033978	genus	Lectera					0.522727	0.294118
1213737	574935	genus	Schizopora					0.0909091	0.0294118
1218809	412507	species	Tremellales sp. CCFEE 5196					0.0714286	0.0882353
1218810	412507	species	Tremellales sp. CCFEE 5612					0.047619	0.0588235
1219434	412507	species	Tremellales sp. SAP708.3					0.238095	0.205882
1219436	5220	species	Trimorphomyces sp. SAP1008.3					0.261905	0.0294118
1219449	5206	species	Cryptococcus sp. SAP963.4					0	0.0294118
1224812	1343192	species	Deniquelata barringtoniae				Deniquelata barringtoniae Ariyawansa & K.D. Hyde 2013	0.0952381	0.0588235
1234632	79808	species	Coniochaeta canina		Lecythophora canina			0.333333	0.0882353
1255046	92860	suborder	Massarineae					0.954545	0.970588
1258667	45426	species	Ascomycota sp. EK28					0.0714286	0.0588235
1280617	13201	species	Phaeococcomyces eucalypti					0.0227273	0.0294118
1296608	411563	species	Minimedusa cf. polyspora X-14					0.0714286	0
1301143	88646	subfamily	Xanthorioideae					0.047619	0.0294118
1302176	107465	suborder	Teloschistineae					0.0681818	0.0294118
1302238	39937	subfamily	Buellioideae					0.136364	0.117647
1303434	1898458	species	Pseudocoleophoma polygonicola				Pseudocoleophoma polygonicola Kaz. Tanaka & K. Hiray., 2015	0.0227273	0
1303459	100032	species	Keissleriella culmifida		Leptosphaeria culmifida;Metasphaeria culmifida;Sphaeria culmifida;Trichometasphaeria culmifida		Keissleriella culmifida (P. Karst.) S.K. Bose, 1961	0.136364	0.0588235
1303514	36922	species	Diaporthe toxica					0.272727	0.147059
1312586	89443	species	fungal sp. F188					0.0681818	0.0294118
1332277	88747	species	Acarospora thamnina		Lecanora cervina var. thamnina			0.428571	0.352941
1342378	28556	genus	Comoclathris					0.113636	0.147059
1351845	64899	genus	Pseudoseptoria					0.204545	0.235294
1352506	5206	species	Cryptococcus sp. CBS 12710					0	0.0588235
1354935	43220	species	Capronia sp. BRO-2013					0.0227273	0
1385568	1385567	species	Etayoa trypethelii				Etayoa trypethelii (Flakus & Kukwa) Diederich & Ertz	0	0.0588235
1423643	209473	species	Dothideomycetes sp. LS-2013g					0.0681818	0.0294118
1423644	1837870	species	Spissiomyces ramosus				Spissiomyces ramosus L. Su, L.Y. Guo & Xing.Z. Liu, 2016	0.166667	0.147059
1434221	1515431	species	Apenidiella strumelloidea		Cladosporium strumelloideum;Penidiella strumelloidea			0.0454545	0.0294118
1446840	1297910	species	Gyrothrix verticillata				Gyrothrix verticillata Piroz., 1962	0.0681818	0
1450326	92860	family	Lophiotremataceae				Lophiotremataceae K. Hiray. & Kaz. Tanaka, 2011	0.0238095	0.0882353
1468175	5206	species	Cryptococcus sp. DEC24					0	0.0294118
1477511	13201	species	Phaeococcomyces mexicanus		Phaeococcomyces mexicana		Phaeococcomyces mexicanus O. Moreno-Rico & Crous, 2014	0.159091	0.235294
1496571	150231	species	Pezizomycotina sp. PAH2_7					0.159091	0.264706
1499099	103886	genus	Pseudolachnella					0.204545	0.235294
1504671	100051	species	Delitschia confertaspora					0.0227273	0
1506662	358905	species	Serendipita sp. MAFF 305841					0.0227273	0
1507903	1971361	genus	Diplolaeviopsis				Diplolaeviopsis Giralt & D. Hawksw., 1991	0	0.0882353
1507904	1507903	species	Diplolaeviopsis ranula				Diplolaeviopsis ranula Giralt & D. Hawksw., 1991	0	0.0294118
1508183	134362	family	Neodevriesiaceae				Neodevriesiaceae Quaedvlieg & Crous, 2014	0.25	0.323529
1508249	1667166	genus	Alfaria					0.477273	0.352941
1508290	1508183	genus	Neodevriesia					0.227273	0.323529
1515416	668547	genus	Austroafricana					0.571429	0.705882
1515428	668547	genus	Neocatenulostroma					0.113636	0.0882353
1515432	668547	genus	Parateratosphaeria					0.0909091	0.117647
1515438	668547	genus	Myrtapenidiella					0.318182	0.323529
1515599	668547	genus	Pseudoteratosphaeria					0.0238095	0.0294118
1518507	111584	species	Buellia punctata		Amandinea punctata;Lecidea punctata			0.0952381	0
1520881	147547	no rank	OSLEUM clade					0.613636	0.617647
1521060	37234	species	Spiromastix asexualis		Spiromastigodes asexualis		Spiromastix asexualis D. A. Sutton, L. Rizzo, Stchigel & Guarro, 2014	0	0.0294118
1524403	45426	species	Ascomycota sp. 3 IP-2014					0	0.0294118
1524408	1053489	species	Botryosphaeriales sp. 1 IP-2014					0.227273	0.205882
1524426	54695	species	Helotiales sp. 4 IP-2014					0.0454545	0
1524444	243625	species	Venturiaceae sp. IP-2014					0.0681818	0.147059
1524830	1615853	species	Cystobasidiomycetes sp. DSM 28479					0.0238095	0
1536653	116785	species	Amandinea coniops		Buellia coniops;Lecidea coniops			0.0238095	0.0294118
1538025	42302	genus	Echria				Echria (N. Lundq.) Kruys, Huhndorf and A.N. Mill.,	0.0238095	0
1540118	92860	family	Thyridariaceae		Roussoellaceae			0.0227273	0.0294118
1541030	92862	species	Pleosporales sp. KO-groupE 2014					0	0.0588235
1541146	316340	species	Chaetothyriales sp. MP-2014					0	0.0294118
1541441	314148	species	Helicoma sp. NRRL 66050					0	0.0294118
1542784	39679	species	Arthonia mediella		Opegrapha mediella			0.047619	0.0588235
1559925	1635105	species	Cyclopsomyces plurioperculatus				Cyclopsomyces plurioperculatus K. Seto & Y. Degawa, 2015	0.0238095	0
1562865	286563	species	Devriesia sp. ZWY-2014b					0.047619	0.0294118
1565365	89443	species	fungal sp. C1/08					0.113636	0
1570301	5014	family	Saccotheciaceae		Aureobasidiaceae;Saccotheciei			0.931818	1
1572707	159987	order	Tubeufiales					0.522727	0.558824
1581159	5234	family	Rhynchogastremataceae					0.840909	0.5
1581692	5533	species	Rhodotorula sp. UFMG-ABT656					0.0227273	0.0588235
1585410	151555	species	Eurotiomycetes AZ1057					0.047619	0.0588235
1586329	38240	species	Basidiomycota sp. 4 IP-2014					0.0227273	0
1589771	34374	genus	Sphaerellopsis				Sphaerellopsis Cook, 1883	0.0454545	0.0294118
1602727	62131	species	Capnobotryella sp. 130A					0	0.0294118
1604202	37840	species	Pestalotiopsis sp. CJL-2014					0.0909091	0.0882353
1615853	432005	no rank	unclassified Cystobasidiomycetes					0.136364	0.0882353
1618111	1618100	no rank	Phaeomoniellales incertae sedis					0.318182	0.441176
1623265	37234	species	Spiromastix sp. CBS 138268					0	0.0294118
1634513	110618	genus	Xenogliocladiopsis					0.0454545	0.0882353
1634515	1634513	species	Xenogliocladiopsis cypellocarpa		Xenogliocladiopsis cypellocarpum		Xenogliocladiopsis cypellocarpa L. Lombard & Crous, 2015	0.0454545	0.0882353
1647800	1329062	species	Terana caerulea		Byssus caerulea;Byssus coerulea;Terana coerulea		Terana caerulea (Schrad. ex Lam.) Kuntze, 1891	0	0.0882353
1652681	5206	species	Cryptococcus sp. yHKS491					0	0.0294118
1654578	1508298	species	Circinotrichum maculiforme		Psilonia maculiformis		Circinotrichum maculiforme Nees, 1817	0.0238095	0
1656977	45426	species	Ascomycota sp. UNEX FECRGA 2012E484					0.0909091	0
1664452	316340	species	Chaetothyriales sp. G4.5E1d					0.0454545	0.0882353
1664454	316340	species	Chaetothyriales sp. G7.5F1a2					0.0227273	0.0294118
1667166	5125	family	Stachybotryaceae		Stachybotriaceae			0.909091	0.882353
1671274	5020	genus	Wojnowiciella					0.0681818	0.0294118
1671301	1618111	genus	Pseudophaeomoniella					0.0681818	0.0588235
1679014	162454	genus	Fusariella					0.204545	0.117647
1679015	1679014	species	Fusariella sinensis				Fusariella sinensis H.M. Liu & T.Y. Zhang, 2006	0.204545	0.117647
1682408	1682405	genus	Selenodriella					0	0.0588235
1682409	1682408	species	Selenodriella cubensis				Selenodriella cubensis Hern.-Restr. & Crous, 2015	0	0.0588235
1688507	415704	species	Tausonia sp. KBP 4496					0.113636	0.147059
1690601	430999	species	Knufia marmoricola				Knufia marmoricola Onofri & Zucconi, 2015	0.0454545	0.0294118
1697545	139141	species	cf. Tubulicrinis sp. 7 LR-2015					0.0454545	0.0294118
1702109	1932622	species	Brunneoclavispora bambusae				Brunneoclavispora bambusae Phook. & K.D. Hyde, 2015	0.0227273	0
1707701	37463	species	Phoma sp.					0	0.0294118
1709937	366822	species	Lecanoromycetes sp.					0	0.0882353
1709938	159638	species	Leotiomycetes sp.					0.214286	0.0882353
1709939	45426	species	Ascomycota sp.					0.0454545	0.0588235
1709941	89443	species	fungal sp.					0.431818	0.382353
1718875	5583	species	Exophiala sp.					0.0227273	0.0294118
1738095	5255	species	Dacrymyces sp. KA12-0403					0.136364	0
1738763	89443	species	fungal sp. F6_OT2A-300					0	0.0294118
1750783	316340	species	Chaetothyriales sp. A1022					0.0227273	0.0294118
1750907	1663550	species	Lichenostigmatales sp. A930					0.522727	0.382353
1755422	47744	species	Cistella sp.					0.0227273	0
1755443	92862	species	Pleosporales sp.					0.477273	0.5
1755765	756399	species	Tayloriella erythrosticta		Lecanora erythrosticta		Tayloriella erythrosticta (Taylor) S. Y. Kondr., Krnefelt, A. Thell, Elix, J. Kim, A. S. Kondratiuk & J.-S. Hur, 2015	0.0227273	0.0294118
1756098	515146	species	Capnodiales sp.					0	0.0294118
1756114	155415	species	Monosporascus sp.					0.0227273	0
1759442	1851469	family	Trichosporonaceae					0.0238095	0
1763018	147498	genus	Cryptocoryneum					0.0454545	0.0294118
1769453	290882	genus	Semifissispora					0.431818	0.235294
1769455	1769453	species	Semifissispora natalis				Semifissispora natalis Crous, J. Edwards & P.W.J. Taylor, 2015	0.409091	0.205882
1769456	1769453	species	Semifissispora rotundata				Semifissispora rotundata H.J. Swart, 1982	0.0454545	0
1770170	683158	genus	Neoascochyta					0.431818	0.588235
1792690	1792689	species	Crumenulopsis sororia		Crumenula sororia		Crumenulopsis sororia (P. Karst.) J.W. Groves, 1969	0	0.0294118
1798079	47022	species	Orbilia sp. HOB-2016ay					0.0238095	0.0294118
1798808	460509	genus	Symmetrospora					0.568182	0.529412
1798813	460509	genus	Buckleyzyma					0.113636	0.205882
1798851	452282	genus	Phyllozyma					0.0454545	0
1798857	48847	genus	Pseudobensingtonia					0.0227273	0.0588235
1798865	48846	family	Kondoaceae					0.333333	0.235294
1798998	222545	no rank	unclassified Xylariomycetidae					0.0227273	0
1799696	231213	family	Sporidiobolaceae					0.75	0.823529
1799703	1799696	genus	Rhodosporidiobolus					0.0238095	0.0588235
1799785	162483	family	Chrysozymaceae					0.795455	0.588235
1801565	1799785	genus	Sampaiozyma					0.795455	0.588235
1802941	45307	genus	Pseudostrickeria					0	0.0294118
1802942	1802941	species	Pseudostrickeria muriformis				Pseudostrickeria muriformis Wanasinghe, Q. Tian, Camporesi & K.D. Hyde, 2015	0	0.0294118
1812776	37989	family	Sporocadaceae					0.386364	0.264706
1828766	55176	genus	Sparticola					0.0238095	0
1834865	5206	species	Cryptococcus sp. 9.L31					0.0454545	0.0294118
1834872	62074	species	Sarcinomyces sp. 9.L27					0.0681818	0.205882
1835684	531413	species	Lamiales environmental sample					0.0454545	0.0588235
1844887	55067	species	Phaeosphaeria sp. CX					0.159091	0.117647
1850153	5583	species	Exophiala sp. DTO 305-D1					0.0681818	0.0294118
1851470	1851469	family	Tetragoniomycetaceae				Tetragoniomycetaceae Oberw. & Bandoni, 1981	0.159091	0.205882
1851509	5408	genus	Naganishia					0.25	0.0882353
1851551	90883	family	Mrakiaceae					0.227273	0.323529
1851555	5408	genus	Heterocephalacria					0.113636	0.147059
1852212	45426	species	Ascomycota sp. 1 PV-2016					0.0227273	0
1853264	2059301	species	Dematiopleospora cirsii				Dematiopleospora cirsii Wanas., Camporesi, E.B.G. Jones & K.D. Hyde, 2015, nom.inval.;Dematiopleospora cirsii Wanas., Camporesi, E.B.G. Jones & K.D. Hyde, 2017	0.181818	0.176471
1853266	703475	species	Tremateia arundicola				Tremateia arundicola Wanas., E.B.G. Jones & K.D. Hyde, 2016	0.0238095	0.0294118
1859699	1859696	species	Albifimbria verrucaria		Myrothecium verrucaria;Peziza verrucaria		Albifimbria verrucaria (Alb. & Schwein.) L. Lombard & Crous, 2016	0.0227273	0
1859940	1667166	genus	Paramyrothecium					0.227273	0.235294
1871383	92987	species	Phaeotheca salicorniae				Phaeotheca salicorniae Crous & Roets, 2016	0.0227273	0.0588235
1871902	284609	species	Strigula nitidula				Strigula nitidula Mont., 1842	0.340909	0.294118
1873266	93133	genus	Neopseudocercosporella					0.0238095	0
1874898	1231880	species	Trechisporales sp.					0.0227273	0
1882907	1197700	species	Microbotryozyma sp. C2-13					0.0227273	0.0588235
1884633	5234	family	Cryptococcaceae					0.954545	0.970588
1890237	5234	family	Trimorphomycetaceae					0.454545	0.264706
1890241	1890238	species	Carlosrosaea sp. 1 ML-2016					0.0909091	0.0882353
1890244	1890237	genus	Saitozyma					0.318182	0.147059
1890245	1890244	species	Saitozyma sp. BSB 30					0.0238095	0
1890680	268179	species	Cryptotrichosporon brontae		Cryptotrichosporon brontus		Cryptotrichosporon brontae O. Rohl, A. Yurkov & J. P. Sampaio, 2017	0	0.0588235
1891666	1671297	species	Neophaeomoniella sp.					0	0.0294118
1891946	1884640	genus	Vishniacozyma					0.931818	0.705882
1898320	1255046	family	Dictyosporiaceae					0.25	0.147059
1898406	1255055	genus	Fuscostagonospora					0.0714286	0
1898421	715496	genus	Clypeoloculus					0.047619	0
1898458	1898320	genus	Pseudocoleophoma					0.227273	0.0588235
1905114	1905112	genus	Phaeotremella					0.0454545	0.117647
1909749	1905116	genus	Genolevuria				Genolevuria X.Z. Liu, F.Y. Bai, M. Groenew. & Boekhout, 2015	0.431818	0.294118
1910893	5234	family	Cuniculitremaceae					0.0227273	0.0882353
1910953	37989	family	Bartaliniaceae					0.704545	0.588235
1911176	1508249	species	Alfaria spartii				Alfaria spartii Senan., Camporesi & K.D. Hyde, 2016	0.0454545	0.0294118
1917373	5206	species	Cryptococcus sp. DV-2016a					0.809524	0.705882
1919753	209473	species	Dothideomycetes sp. genotype 724 JMUR-2016					0.0227273	0
1919922	89443	species	fungal sp. genotype 824 JMUR-2016					0	0.0294118
1929954	1572707	family	Bezerromycetaceae					0.386364	0.352941
1955089	47274	species	Dactylaria sp.					0.0454545	0
1956015	1956014	species	Clypeophysalospora latitans		Physalospora latitans		Clypeophysalospora latitans (Sacc.) H.J. Swart, 1981;Physalospora latitans Sacc., 1893	0.5	0.382353
1960599	78388	species	Coniothyrium hakeae				Coniothyrium hakeae Crous & Barber, 2016	0.272727	0.352941
1960841	1960840	species	Neoscolecobasidium agapanthi				Neoscolecobasidium agapanthi Crous, 2016	0	0.117647
1960861	371108	species	Saccharata eucalyptorum				Saccharata eucalyptorum Crous, 2016	0.159091	0.205882
1960863	371108	species	Saccharata hakeicola				Saccharata hakeicola Crous, 2016	0	0.0294118
1960873	1589771	species	Sphaerellopsis hakeae				Sphaerellopsis hakeae Crous, 2016	0.0454545	0.0294118
1961798	56761	species	Cyanodermella oleoligni				Cyanodermella oleoligni van Nieuwenhuijzen & Samson, 2016	0	0.0294118
1962182	37883	genus	Banhegyia					0.0909091	0.147059
1962184	1962182	species	Banhegyia cf. setispora G.M. 2015-04-29.1					0.0681818	0.0882353
1966419	470063	species	Toxicocladosporium hominis		Toxicocladosporium sp. UTHSC DI-13-172		Toxicocladosporium hominis Sandoval-Denis, Gene & Deanna A. Sutton, 2016	0.0714286	0.147059
1968649	1968648	species	Corticifraga peltigerae		Belonidium peltigerae;Peziza peltigerae;Pseudopeziza peltigerae		Corticifraga peltigerae (Fuckel) D. Hawksw. & R. Sant., 1990;Peziza peltigerae Fuckel, 1871	0.113636	0.0588235
1971361	5178	family	Cordieritidaceae					0.0227273	0.0882353
1971362	5178	family	Cenangiaceae		Hemiphacidiaceae			0.0909091	0.117647
1971737	1234780	species	Lyomyces mascarensis				Lyomyces mascarensis Riebesehl, Yurchenko & E. Langer , 2017	0.0238095	0
1981958	162477	genus	Pseudomicrostroma					0	0.0294118
1983418	2034146	species	Chlamydomonas sp. JIAC4					0	0.0588235
1986134	278881	species	Myriangiales sp.					0	0.0882353
1986326	50931	genus	Lepra				Lepra Scop., 1777	0.0238095	0
2012700	5296	species	Puccinia bassiae				Puccinia bassiae Samuel, 1924	0.047619	0.0588235
2014862	2014861	species	Davidiellomyces australiensis				Davidiellomyces australiensis Crous, 2017	0.0681818	0.0882353
2015261	100032	species	Keissleriella cirsii				Keissleriella cirsii R.H. Perera, Bulgakov, Wanasinghe & K.D. Hyde, 2017	0.0227273	0.0588235
2015380	2066858	species	Delonicicola siamense				Delonicicola siamense R.H. Perera, Maharachch. & K.D. Hyde, 2017	0.0681818	0
2020803	2020802	species	Malvales environmental sample					0	0.0294118
2020818	2020817	species	Asparagales environmental sample					0.409091	0.323529
2027812	2027811	species	Classiculaceae sp. YH-2017a					0	0.0294118
2046349	5206	species	Cryptococcus sp.					0	0.0294118
2054742	93492	species	Pringsheimia sp.					0.0227273	0
2059301	5020	genus	Dematiopleospora					0.181818	0.176471
2080711	91806	species	Trapelia elacista				Trapelia elacista (Ach.) Orange, 2018	0.0227273	0
2081971	1851575	species	Solicoccozyma sp.					0.0681818	0.0588235
2086676	1898406	species	Fuscostagonospora cytisi				Fuscostagonospora cytisi Jayasiri, Camporesi & K.D. Hyde, 2017	0.0714286	0
2093500	2093499	species	Fitzroyomyces cyperi				Fitzroyomyces cyperi Crous, 2017	0.0454545	0.0294118
2093506	2093505	species	Neoconiothyrium persooniae				Neoconiothyrium persooniae Crous, 2017	0.0238095	0.0294118
3051	3042	family	Chlamydomonadaceae					0	0.0882353
3166	3041	class	Chlorophyceae				Chlorophyceae Christensen, 1994	0.136364	0.117647
3524	1437201	order	Caryophyllales		Centrospermae		Caryophyllales Juss. ex Bercht. & J.Presl, 1820	0.0681818	0.0294118
3699	91836	order	Brassicales		Capparales			0.318182	0.147059
4027	41943	family	Geraniaceae	geranium family			Geraniaceae Juss., 1789	0.0681818	0.0294118
4854	214503	family	Mortierellaceae					0.0238095	0
4892	4891	order	Saccharomycetales		Endomycetales			0.113636	0.176471
4893	4892	family	Saccharomycetaceae					0.0909091	0.0294118
5009	5008	family	Taphrinaceae					0	0.0294118
5043	129384	genus	Acremonium					0.0909091	0.0294118
5103	33183	family	Ascosphaeraceae					0.0227273	0
5133	110618	genus	Nectria					0	0.0588235
5215	5234	family	Tremellaceae					0.795455	0.823529
5226	355688	order	Auriculariales					0.0952381	0.0588235
5227	5226	family	Auriculariaceae					0.0238095	0
5245	5244	family	Septobasidiaceae					0	0.0588235
5255	5254	genus	Dacrymyces					0.136364	0
5262	5258	family	Pucciniaceae					0.227273	0.352941
5263	5262	genus	Uromyces					0.0238095	0
5267	5257	order	Ustilaginales	smut fungi;smuts				0.0454545	0.147059
5279	62916	family	Tilletiaceae					0	0.0588235
5309	80628	genus	Athelia					0.0227273	0
5339	5338	family	Agaricaceae		Battarreaceae			0	0.0588235
5408	90886	family	Filobasidiaceae					0.954545	1
5426	5338	family	Lycoperdaceae					0.0227273	0.0588235
5890	291294	genus	Tetrahymena					0	0.0294118
13000	159639	genus	Chalara					0.0238095	0
13786	42111	genus	Trebouxia				Trebouxia Puymaly, 1924	0.227273	0.147059
27310	28984	genus	Cephaloascus					0	0
27330	5008	family	Protomycetaceae					0.363636	0.264706
29865	103887	genus	Nectriopsis					0.166667	0.0294118
33159	5185	family	Helvellaceae					0.0454545	0.0294118
34371	5120	family	Erysiphaceae					0.272727	0.205882
34372	34371	genus	Blumeria					0.113636	0.117647
34418	204043	family	Cystobasidiaceae					0.409091	0.264706
34479	34478	family	Spizellomycetaceae					0.0454545	0.0588235
37240	221903	family	Myxotrichaceae					0.0454545	0
37883	37882	family	Patellariaceae		Lecanidiaceae			0.0909091	0.147059
38462	110844	genus	Lambertella					0.166667	0.0882353
39678	39677	family	Arthoniaceae					0.0909091	0.0588235
39933	157822	family	Lecanoraceae					0	0.0294118
39941	39940	genus	Mycocalicium					0	0.0294118
40111	39677	family	Roccellaceae					0	0.0294118
40424	139380	family	Hymenochaetaceae					0	0.0294118
40653	665637	genus	Wallrothiella					0.0238095	0
41954	5338	family	Amanitaceae					0	0.0294118
42803	77634	genus	Spongiochloris				Spongiochloris Starr, 1955	0.0909091	0.0588235
46451	292491	family	Thelebolaceae					0.190476	0.235294
46635	64899	genus	Hormonema					0.409091	0.5
47166	147548	order	Rhytismatales					0.409091	0.323529
47196	5186	genus	Iodophanus					0.261905	0.117647
47218	5189	genus	Saccobolus					0.0714286	0
48846	162480	order	Agaricostilbales					0.363636	0.294118
48847	48846	family	Agaricostilbaceae					0.0454545	0.0588235
50931	88639	family	Pertusariaceae					0.0238095	0
54683	110844	genus	Lanzia					0.0454545	0.0588235
55071	55070	family	Microbotryaceae					0.047619	0.0588235
56189	5338	family	Podaxaceae					0.0227273	0
56761	56757	genus	Cyanodermella					0	0.0294118
62131	668547	genus	Capnobotryella					0	0.0294118
62133	134362	family	Capnodiaceae					0.238095	0.0882353
62911	62910	family	Entorrhizaceae					0.0909091	0.0588235
62917	162475	family	Microstromataceae					0.0238095	0
64515	1396497	genus	Rhizophlyctis					0.0681818	0
68763	157608	family	Geastraceae					0.0227273	0
68793	68792	genus	Botryobasidium					0.0238095	0
68808	56487	family	Typhulaceae					0	0.0294118
71662	147498	genus	Monodictys					0	0.0588235
71934	5338	family	Entolomataceae					0.0681818	0
73564	129384	genus	Aporospora					0	0.0294118
75748	56757	genus	Glomerobolus					0.0909091	0.147059
77634	3042	no rank	Chlamydomonadales incertae sedis		Chlorococcales incertae sedis;Volvocales incertae sedis			0.113636	0.0882353
78388	1460697	genus	Coniothyrium					0.272727	0.352941
81067	4761	no rank	unclassified Chytridiomycota					0.0952381	0.0588235
82267	332899	genus	Hyaloraphidium					0	0
85904	1974272	family	Vorticellidae					0	0
89802	68798	genus	Hyphoderma					0.0238095	0.0294118
90883	155616	order	Cystofilobasidiales		Heterobasidiomycetidae			0.681818	0.617647
93492	64899	genus	Pringsheimia					0.0227273	0
93809	93808	family	Calosphaeriaceae					0.0227273	0.0294118
100034	147498	genus	Massariosphaeria					0.452381	0.529412
100051	221679	genus	Delitschia					0.0909091	0
103393	452342	family	Peniophoraceae					0	0.0588235
104249	452226	genus	Candelaria					0.047619	0.0588235
104350	5338	family	Crepidotaceae					0	0.0294118
104366	5338	family	Pleurotaceae					0.0238095	0.0294118
107465	388435	order	Teloschistales					0.0681818	0.0294118
109763	109762	genus	Harpochytrium					0.0454545	0
110158	5139	no rank	Sordariales incertae sedis					0.0227273	0.0294118
110846	5185	family	Pyronemataceae					0.0238095	0
111584	1302238	genus	Buellia					0.0909091	0.0294118
112071	432008	genus	Naohidea					0.047619	0
115784	4892	family	Phaffomycetaceae		Wickerhamomycetaceae			0	0.0588235
116785	1302238	genus	Amandinea					0.0238095	0.0294118
129384	4890	no rank	Ascomycota incertae sedis					0.818182	0.676471
131567	1	no rank	cellular organisms		biota			1	1
139141	202723	genus	Tubulicrinis					0.0454545	0.0882353
139971	103886	genus	Menispora					0	0.0294118
146291	451870	order	Verrucariales					0.113636	0.0882353
147379	147367	tribe	Ehrharteae				Ehrharteae Nevski, 1937	0	0.0588235
147383	147368	tribe	Stipeae				Stipeae Dumort., 1824	0	0.0588235
147388	147368	tribe	Bromeae				Bromeae Dumort., 1824	0	0.176471
147544	92860	family	Teichosporaceae		Floricolaceae			0.159091	0.352941
147549	147538	class	Pezizomycetes					0.590909	0.352941
147569	147568	genus	Myriangium					0	0.0294118
148959	431959	genus	Wallemia					0	0.0294118
150231	147538	no rank	unclassified Pezizomycotina					0.159091	0.264706
151555	147545	no rank	unclassified Eurotiomycetes					0.047619	0.0588235
152648	152647	family	Trichosphaeriaceae					0.113636	0.117647
152655	5114	no rank	Diaporthales incertae sedis					0.0238095	0
153036	5181	no rank	unclassified Helotiaceae					0.0238095	0
156300	34395	no rank	Chaetothyriales incertae sedis					0.0909091	0.205882
157252	5405	genus	Muribasidiospora					0	0.0294118
157821	388282	order	Acarosporales		Acarosporineae			0.431818	0.470588
157822	5197	suborder	Lecanorineae					0.181818	0.323529
160892	34426	genus	Ceratosebacina					0	0.0294118
162483	162481	no rank	Microbotryomycetes incertae sedis					0.818182	0.705882
165808	90883	family	Cystofilobasidiaceae					0.690476	0.588235
172614	78060	genus	Flavoparmelia					0.0714286	0.147059
184208	5338	family	Psathyrellaceae					0.159091	0.147059
188544	188543	genus	Demodex					0.047619	0.0294118
189479	189478	order	Orbiliales					0.590909	0.441176
191554	451868	order	Hysteriales					0.227273	0.205882
194286	33829	subclass	Stichotrichia				Stichotrichia Small & Lynn, 1985	0	0.0294118
195796	5198	genus	Ramalea					0	0.0294118
205932	147538	no rank	Pezizomycotina incertae sedis					0.136364	0.0588235
209470	92860	no rank	environmental samples					0	0.0294118
222545	147550	subclass	Xylariomycetidae					0.909091	0.941176
227329	227327	family	Pisolithaceae					0	0.0588235
227336	227332	family	Suillaceae					0.0238095	0
228942	5304	genus	Limonomyces					0.295455	0.235294
237462	205932	genus	Anungitopsis					0.047619	0.0294118
242511	148100	genus	Selenophoma					0.047619	0.0882353
243625	5023	no rank	unclassified Venturiaceae					0.0681818	0.147059
248098	1130097	genus	Asterothyrium					0.261905	0.0588235
261460	222544	order	Chaetosphaeriales					0.681818	0.529412
265079	47167	genus	Coccomyces					0.340909	0.235294
271835	56757	genus	Acarosporina					0	0.0294118
278881	45676	no rank	unclassified Myriangiales					0	0.0882353
284609	714593	genus	Strigula					0.340909	0.294118
286563	668547	genus	Devriesia					0.0454545	0.0588235
286660	159987	genus	Peltaster				Peltaster Sydow & P. Sydow 1917	0.0227273	0.0294118
292187	56757	genus	Carestiella					0.0714286	0.0588235
314148	43216	genus	Helicoma					0	0.0294118
332217	138177	genus	Neochlorosarcina				Neochlorosarcina S.Watanabe, 1983	0.0909091	0.0588235
333826	7147	no rank	environmental samples					0.0227273	0.0294118
358905	1506295	genus	Serendipita		Piriformospora			0.0227273	0
361669	3090	genus	Hemiflagellochloris					0	0.0294118
364710	146292	genus	Endocarpon					0.0454545	0.0588235
366822	147547	no rank	unclassified Lecanoromycetes					0	0.0882353
399129	5114	family	Cryphonectriaceae					0.0238095	0
407091	189359	genus	Plectosphaera					0.738095	0.823529
407949	159987	genus	Fusculina					0.136364	0.147059
412475	162481	no rank	unclassified Microbotryomycetes					0	0.0294118
412481	159987	genus	Asteromella					0.0681818	0.147059
412507	5234	no rank	unclassified Tremellales					0.357143	0.294118
415704	1851551	genus	Tausonia		Guehomyces			0.113636	0.147059
426519	162475	family	Quambalariaceae					0.0227273	0.117647
451435	4761	class	Chytridiomycetes					0.227273	0.205882
451453	451442	family	Kappamycetaceae					0.0227273	0.117647
451868	147541	subclass	Pleosporomycetidae					0.954545	1
451871	147545	subclass	Eurotiomycetidae					0.181818	0.382353
452225	189476	order	Candelariales					0.0454545	0.0882353
452282	452281	family	Spiculogloeaceae				Spiculogloeaceae Denchev 2009	0.0454545	0
452284	5204	subphylum	Ustilaginomycotina					0.363636	0.676471
452333	155619	subclass	Agaricomycetidae					0.363636	0.5
452334	452333	order	Atheliales					0.0227273	0
452342	355688	order	Russulales		Hericiales;Stereales			0.0454545	0.0588235
464695	139065	genus	Giulia					0	0.0294118
467802	451442	no rank	unclassified Rhizophydiales					0.0909091	0.0294118
467980	668547	genus	Penidiella					0.0681818	0.0294118
470097	129384	genus	Radulidium					0.113636	0.117647
531413	4143	no rank	environmental samples					0.0454545	0.0588235
565406	147498	genus	Pseudorobillarda					0.522727	0.294118
574935	139380	family	Schizoporaceae					0.0909091	0.0294118
584654	578128	genus	Anteholosticha				Anteholosticha Berger, 2003	0	0.0294118
599737	115784	genus	Wickerhamomyces					0	0.0294118
640623	147387	subtribe	Aveninae				Aveninae J.Presl, 1830	0.0454545	0.411765
640630	1652081	subtribe	Loliinae				Loliinae Dumort., 1829	0.0227273	0.352941
651026	703500	genus	Endosporium					0.309524	0.176471
654128	5338	family	Marasmiaceae					0.0227273	0.0588235
681950	1028384	family	Glomerellaceae					0.613636	0.617647
703493	1298587	genus	Mauritiana					0.0238095	0
714650	39678	genus	Herpothallon					0.0227273	0
714940	92860	family	Tetraplosphaeriaceae				Tetraplosphaeriaceae Kaz. Tanaka & K. Hiray 2009	0.0227273	0
715341	451868	no rank	Pleosporomycetidae incertae sedis					0.0681818	0.0588235
715496	1255046	family	Morosphaeriaceae				Morosphaeriaceae Suetrong, Sakayaroj, E.B.G. Jones, & C.L. Schoch 2009	0.047619	0
715962	716546	no rank	dothideomyceta					0.954545	1
718228	718227	genus	Sporormiella					0.0227273	0.0294118
742845	162474	family	Malasseziaceae				Malasseziaceae Denchev & R.T. Moore 2009	0.25	0.411765
746524	102821	subtribe	Arctotidinae				Arctotidinae (Cass.) Dumort., 1829	0.159091	0
756399	1755755	genus	Tayloriella				Tayloriella S. Y. Kondr., Krnefelt, A. Thell, Elix & J.-S. Hur, 2016	0.0227273	0.0294118
862241	5338	family	Physalacriaceae				Physalacriaceae Corner 1970	0.0238095	0
1033978	1028384	family	Plectosphaerellaceae				Plectosphaerellaceae W.Gams, Summerbell & Zare 2007	0.590909	0.323529
1051141	668547	genus	Camarosporula					0	0.0294118
1084655	5186	genus	Delastria					0.047619	0.0294118
1110386	1110380	tribe	Rumiceae				Rumiceae Dumort., 1827	0.0681818	0
1131492	5042	family	Aspergillaceae				Aspergillaceae Link 1826	0.142857	0.294118
1134080	34478	family	Powellomycetaceae				Powellomycetaceae D.R. Simmons	0	0.0588235
1163720	231212	family	Leucosporidiaceae					0.613636	0.441176
1167810	1167809	genus	Betamyces					0.0238095	0
1171044	5114	family	Harknessiaceae				Harknessiaceae Crous 2012	0.409091	0.235294
1197700	63282	genus	Microbotryozyma				Microbotryozyma Suh, Maslov, Molestina & Zhou 2012	0.0227273	0.0588235
1198468	62914	no rank	unclassified Entylomatales					0	0.0588235
1229510	452343	family	Hydnodontaceae				Hydnodontaceae Juelich 1981	0.0681818	0.0294118
1231880	452343	no rank	unclassified Trechisporales					0.0227273	0
1233474	34395	family	Trichomeriaceae				Trichomeriaceae Chomnunti & K.D. Hyde 2012	0.477273	0.294118
1234780	5304	genus	Lyomyces					0.0238095	0
1255055	1255046	no rank	Massarineae incertae sedis					0.0714286	0
1297910	205932	genus	Gyrothrix					0.0681818	0
1302181	388435	order	Caliciales		Physciineae			0.159091	0.147059
1322061	5250	genus	Rhizoctonia					0.0227273	0
1329062	396331	genus	Terana					0	0.0882353
1341112	34395	family	Cyphellophoraceae				Cyphellophoraceae Reblova & Unter. 2013	0.181818	0.0882353
1341135	66611	genus	Camptophora					0.0238095	0
1343192	221678	genus	Deniquelata					0.0952381	0.0588235
1344078	452338	no rank	Corticiales incertae sedis					0.0681818	0.0588235
1385565	1385564	family	Phaeococcomycetaceae					0.590909	0.5
1385567	1385565	genus	Etayoa				Etayoa Diederich & Ertz, 2013	0	0.0588235
1406929	189479	no rank	Orbiliales incertae sedis					0.0227273	0.0294118
1424649	451869	family	Phyllostictaceae				Phyllostictaceae Fr.	0.0681818	0.0588235
1450292	451869	family	Saccharataceae				Saccharataceae Slippers, Boissin & Crous, 2013	0.25	0.264706
1484953	147548	order	Phacidiales					0.295455	0.264706
1508298	37990	genus	Circinotrichum					0.0238095	0
1515431	668547	genus	Apenidiella					0.0454545	0.0294118
1520784	1520783	family	Trapeliaceae					0.0454545	0
1520791	1520881	subclass	Umbilicariomycetidae					0	0.0294118
1535325	766764	no rank	Candida/Lodderomyces clade					0	0.0294118
1535529	297313	no rank	Sebacinales incertae sedis					0.0454545	0.0294118
1535530	5114	family	Schizoparmaceae					0.227273	0.176471
1582909	715340	no rank	Pleosporineae incertae sedis					0.0909091	0.0294118
1611264	204043	no rank	Cystobasidiales incertae sedis					0.0238095	0
1618100	451870	order	Phaeomoniellales				Phaeomoniellales K.-H. Chen, A.E. Arnold, Gueidan & Lutzoni, 2015	0.318182	0.441176
1635105	642599	genus	Cyclopsomyces					0.0238095	0
1648017	147389	subtribe	Hordeinae				Hordeinae Dumort., 1829	0	0.0588235
1663550	1385564	no rank	unclassified Lichenostigmatales					0.522727	0.382353
1664131	159987	genus	Ramimonilia					0.0909091	0.0588235
1671297	1618111	genus	Neophaeomoniella					0	0.0294118
1676655	451871	no rank	Eurotiomycetidae incertae sedis					0	0.0588235
1682405	37989	family	Microdochiaceae				Microdochiaceae Hern.-Restr., Crous & J.Z. Groenew., 2015	0.25	0.147059
1769247	5303	family	Fomitopsidaceae		Daedaleaceae;Piptoporaceae			0.0454545	0.0294118
1769459	5178	family	Chaetomellaceae					0.0952381	0.117647
1792689	1971362	genus	Crumenulopsis					0	0.0294118
1799786	1799785	genus	Chrysozyma					0.113636	0.0882353
1803523	1799785	genus	Yunzhangia					0.309524	0.0882353
1804794	5268	genus	Kalmanozyma					0	0.0294118
1837870	159987	genus	Spissiomyces					0.166667	0.147059
1851469	155616	order	Trichosporonales				Trichosporonales Boekhout & Fell, 2001	0.181818	0.205882
1851566	1851565	genus	Piskurozyma					0.0454545	0
1851575	1851565	genus	Solicoccozyma					0.0681818	0.0588235
1859696	1667166	genus	Albifimbria					0.0227273	0
1884640	5234	family	Bulleribasidiaceae				Bulleribasidiaceae X.Z. Liu, F.Y. Bai, M. Groenew. & Boekhout, 2016	0.954545	0.882353
1890238	1890237	genus	Carlosrosaea					0.0909091	0.0882353
1898439	1255046	family	Periconiaceae					0.25	0.176471
1905112	5234	family	Phaeotremellaceae					0.0454545	0.117647
1905116	5234	family	Bulleraceae					0.545455	0.323529
1909748	1905116	genus	Fonsecazyma					0.113636	0.0588235
1931355	5303	family	Irpicaceae				Irpicaceae Spirin & Zmitr., 2003	0.0681818	0.0588235
1932622	1298587	genus	Brunneoclavispora					0.0227273	0
1955842	159987	genus	Coniosporium					0.047619	0.0294118
1956014	189359	genus	Clypeophysalospora					0.5	0.382353
1960840	1150844	genus	Neoscolecobasidium					0	0.117647
1968648	202888	genus	Corticifraga					0.113636	0.0588235
2014861	452563	genus	Davidiellomyces					0.0681818	0.0882353
2020802	41938	no rank	environmental samples					0	0.0294118
2020817	73496	no rank	environmental samples					0.409091	0.323529
2024004	5338	family	Mycenaceae					0.0454545	0.0294118
2027811	2027810	no rank	unclassified Classiculaceae					0	0.0294118
2034146	3052	no rank	unclassified Chlamydomonas					0	0.0588235
2066858	2066857	genus	Delonicicola					0.0681818	0
2093499	56757	genus	Fitzroyomyces					0.0454545	0.0294118
2093505	1460697	genus	Neoconiothyrium					0.0238095	0.0294118
2126968	2126967	family	Symbiotaphrinaceae					0.0227273	0.0588235
2170432	5114	family	Erythrogloeaceae				Erythrogloeaceae Senan. et al., 2018	0.0238095	0.0588235
3041	33090	phylum	Chlorophyta		Chlorophycota;Chlorophyta sensu Bremer 1985		Chlorophyta Pascher, 1914	0.25	0.205882
3090	3042	family	Chlorococcaceae					0	0.0294118
4143	91888	order	Lamiales					0.0454545	0.0588235
4761	112252	phylum	Chytridiomycota		Mastigomycotina;Monoblepharidomycota			0.25	0.205882
4891	147537	class	Saccharomycetes		Hemiascomycetes			0.113636	0.176471
5008	147555	order	Taphrinales		Protomycetales			0.363636	0.264706
5120	147548	order	Erysiphales					0.272727	0.205882
5189	5185	family	Ascobolaceae					0.0714286	0
5197	388435	order	Lecanorales					0.272727	0.382353
5244	162484	order	Septobasidiales					0	0.0588235
5254	28997	family	Dacrymycetaceae					0.136364	0
5257	452284	class	Ustilaginomycetes					0.0454545	0.147059
5258	162484	order	Pucciniales	rust fungi	Uredinales			0.227273	0.352941
5405	5404	family	Exobasidiaceae					0	0.0294118
7147	33392	order	Diptera					0.0227273	0.0294118
28984	4892	family	Cephaloascaceae					0	0
33829	431838	class	Spirotrichea		Spirotricha;Spirotrichia;Spirotrichs		Spirotrichea Buetschli, 1889	0	0.0294118
34478	451435	order	Spizellomycetales					0.0454545	0.117647
37882	159987	order	Patellariales		Lecanidiales			0.0909091	0.147059
39677	147539	order	Arthoniales		Opegraphales			0.0909091	0.0882353
39940	148099	family	Mycocaliciaceae					0	0.0294118
41938	91836	order	Malvales					0	0.0294118
41943	91836	order	Geraniales					0.0681818	0.0294118
42111	75966	order	Microthamniales					0.227273	0.147059
55070	162481	order	Microbotryales					0.0454545	0.0882353
56487	355688	order	Thelephorales					0	0.0294118
62910	62907	order	Entorrhizales					0.0909091	0.0588235
62914	452283	order	Entylomatales					0	0.0588235
62916	452283	order	Tilletiales					0	0.0588235
63282	55070	family	Ustilentylomataceae					0.0227273	0.0588235
68792	36064	family	Botryobasidiaceae					0.0238095	0
68798	5303	family	Hyphodermataceae					0.0238095	0.0294118
73496	1437197	order	Asparagales				Asparagales Link, 1829	0.409091	0.323529
91836	71275	no rank	malvids					0.386364	0.176471
93808	222544	order	Calosphaeriales					0.0227273	0.0294118
102821	219120	tribe	Arctotideae		Arctoteae		Arctotideae Cass., 1819	0.159091	0
109762	79272	family	Harpochytriaceae					0.0454545	0
138177	3166	order	Chlorosarcinales					0.0909091	0.0588235
139065	5302	no rank	Agaricomycotina incertae sedis					0	0.0294118
139380	355688	order	Hymenochaetales					0.113636	0.147059
147367	359160	subfamily	Oryzoideae		Ehrhartoideae			0	0.0588235
147368	359160	subfamily	Pooideae					0.0681818	0.911765
147387	1648037	tribe	Poeae				Poeae R. Br., 1814	0.0681818	0.764706
147389	1648038	tribe	Triticeae				Triticeae Dumort., 1824	0	0.0588235
147568	45676	family	Myriangiaceae					0	0.0294118
148100	5014	no rank	Dothideales incertae sedis					0.047619	0.0882353
152647	147551	order	Trichosphaeriales					0.113636	0.117647
157608	452335	order	Geastrales					0.0227273	0
162474	1538075	order	Malasseziales					0.25	0.411765
162480	29000	class	Agaricostilbomycetes		Agaricostilbomycetidae			0.363636	0.294118
188543	188547	family	Demodicidae					0.047619	0.0294118
189476	147547	no rank	Lecanoromycetes incertae sedis					0.0454545	0.0882353
189478	147538	class	Orbiliomycetes					0.590909	0.441176
202723	139380	family	Tubulicrinaceae					0.0454545	0.0882353
202888	5197	no rank	Lecanorales incertae sedis					0.113636	0.0588235
204043	432005	order	Cystobasidiales					0.409091	0.264706
214503	1137986	order	Mortierellales					0.0238095	0
221679	92860	family	Delitschiaceae					0.0909091	0
227327	68889	suborder	Sclerodermatineae					0	0.0588235
227332	68889	suborder	Suillineae					0.0238095	0
291294	37093	family	Tetrahymenidae					0	0.0294118
292491	147548	order	Thelebolales					0.190476	0.235294
332899	79272	no rank	Monoblepharidales incertae sedis					0	0
388282	147547	subclass	Acarosporomycetidae					0.431818	0.470588
431959	431958	no rank	Wallemiales incertae sedis					0	0.0294118
432008	432007	family	Naohideaceae				Naohideaceae Denchev 2009	0.047619	0
452281	1798830	order	Spiculogloeales					0.0454545	0
452343	355688	order	Trechisporales					0.0681818	0.0294118
578128	486728	family	Holostichidae					0	0.0294118
642599	642598	family	Lobulomycetaceae					0.0238095	0
665637	252199	family	Amplistromataceae					0.0238095	0
703500	45676	no rank	Myriangiales incertae sedis					0.309524	0.176471
714593	1824641	family	Strigulaceae					0.340909	0.294118
1028384	222543	order	Glomerellales				Glomerellales Chadef. ex Reblova, W. Gams & Seifert 2011	0.795455	0.735294
1110380	3615	subfamily	Polygonoideae				Polygonoideae Eaton, 1836	0.0681818	0
1130097	71598	subfamily	Gomphilloideae		Asterothyriaceae;Gomphillaceae			0.261905	0.0588235
1150844	703495	no rank	Microthyriales incertae sedis					0	0.117647
1167809	451442	family	Alphamycetaceae				Alphamycetaceae Letcher 2008	0.0238095	0
1298587	92860	family	Halotthiaceae				Halotthiaceae Y. Zhang ter, J. Fourn. & K.D. Hyde 2013	0.0454545	0
1385564	147539	order	Lichenostigmatales					0.681818	0.617647
1396497	642610	family	Rhizophlyctidaceae				Rhizophlyctidaceae Letcher	0.0681818	0
1437201	91827	no rank	Pentapetalae				Pentapetalae D.E.Soltis, P.S.Soltis & W.S.Judd, 2007	0.590909	0.264706
1460697	715340	family	Coniothyriaceae					0.295455	0.382353
1506295	297313	family	Serendipitaceae					0.0227273	0
1520783	388283	order	Trapeliales					0.0454545	0
1652081	147387	no rank	Poeae Chloroplast Group 2 (Poeae type)					0.0227273	0.352941
1755755	88646	subfamily	Brownlielloideae					0.0227273	0.0294118
1851565	90886	family	Piskurozymaceae				Piskurozymaceae X.Z. Liu, F.Y. Bai, M. Groenew. & Boekhout, 2015	0.113636	0.0588235
1974272	6021	order	Sessilida				Sessilida Kahl, 1933	0	0
2027810	204044	no rank	Classiculaceae				Classiculaceae R. Bauer, Begerow, Oberw. & Marvanov, 2003	0	0.0294118
2066857	37989	family	Delonicicolaceae					0.0681818	0
2126967	1217819	order	Symbiotaphrinales					0.0227273	0.0588235
3615	3524	family	Polygonaceae	buckwheat family			Polygonaceae Juss., 1789	0.0681818	0
5404	452283	order	Exobasidiales					0	0.0294118
6021	6020	subclass	Peritrichia		Peritricha;Peritrichida;Peritrichs			0	0
28997	452332	order	Dacrymycetales					0.136364	0
33090	2759	kingdom	Viridiplantae	green plants	Chlorobionta;Chlorophyta/Embryophyta group;chlorophyte/embryophyte group		Chlorobionta Bremer, 1985;Viridiplantae Cavalier-Smith, 1981	0.863636	0.970588
33392	33340	cohort	Holometabola		Endopterygota			0.0227273	0.0294118
37093	31277	no rank	Tetrahymenina					0	0.0294118
62907	1696033	class	Entorrhizomycetes		Entorrhizomycetidae			0.0909091	0.0588235
68889	452333	order	Boletales					0.0227273	0.0588235
71275	1437201	subclass	rosids					0.386364	0.176471
75966	3041	class	Trebouxiophyceae				Trebouxiophyceae Friedl, 1995	0.227273	0.147059
79272	451454	order	Monoblepharidales					0.0454545	0
91827	71240	no rank	Gunneridae		core eudicots;core eudicotyledons		Gunneridae D.E.Soltis, P.S.Soltis & W.S.Judd, 2007	0.590909	0.264706
91888	71274	no rank	lamiids		euasterids I			0.0454545	0.0588235
112252	4751	no rank	Fungi incertae sedis					0.272727	0.205882
147537	716545	subphylum	Saccharomycotina					0.113636	0.176471
147551	147550	no rank	Sordariomycetes incertae sedis					0.113636	0.117647
147555	451866	class	Taphrinomycetes					0.363636	0.264706
148099	451879	order	Mycocaliciales					0	0.0294118
162484	29000	class	Pucciniomycetes		Urediniomycetidae			0.227273	0.382353
188547	188550	superfamily	Cheyletoidea					0.047619	0.0294118
204044	432003	order	Classiculales					0	0.0294118
219120	4210	subfamily	Cichorioideae				Cichorioideae (Juss.) Chevall., 1852	0.159091	0
252199	222544	no rank	Sordariomycetidae incertae sedis					0.0238095	0
359160	4479	no rank	BOP clade					0.0681818	0.911765
431838	5878	subphylum	Intramacronucleata				Intramacronucleata Lynn, 1996	0	0.0588235
431958	431957	order	Wallemiales					0	0.0294118
432007	432005	order	Naohideales					0.047619	0
452335	155619	subclass	Phallomycetidae					0.0227273	0
642598	451435	order	Lobulomycetales					0.0238095	0
642610	451435	order	Rhizophlyctidales					0.0681818	0
703495	159987	order	Microthyriales					0	0.117647
1137986	1913637	subphylum	Mortierellomycotina					0.0238095	0
1217819	716546	class	Xylonomycetes				Xylonomycetes R. Gazis & P. Chaverri 2012	0.0227273	0.0588235
1437197	4447	subclass	Petrosaviidae				Petrosaviidae S.W.Graham & W.S.Judd, 2007	0.431818	0.941176
1538075	452284	class	Malasseziomycetes				Malasseziomycetes Boekhout, Q.M. Wang & F.Y. Bai, 2014	0.25	0.411765
1648037	147368	no rank	Poodae				Poodae L.Liou, 1980	0.0681818	0.764706
1648038	147368	no rank	Triticodae				Triticodae T.D. Macfarl. & L.Watson, 1982	0	0.0588235
1798830	29000	class	Spiculogloeomycetes					0.0454545	0
1824641	159987	order	Strigulales					0.340909	0.294118
4210	4209	family	Asteraceae	daisy family	Compositae		Asteraceae Bercht. & J.Presl, 1820	0.159091	0
4447	1437183	class	Liliopsida	monocots	Monocotyledoneae			0.431818	0.941176
4479	38820	family	Poaceae	grass family	Bambusaceae;Gramineae		Bambusaceae Nakai, 1943;Poaceae Barnhart, 1895	0.0681818	0.911765
5878	33630	no rank	Ciliophora		Ciliata			0	0.0588235
6020	431838	class	Oligohymenophorea		Holotricha;Oligohymenophora;Oligohymenophorans		Oligohymenophorea de Puytoracetal.,1974	0	0.0294118
31277	6020	order	Hymenostomatida		Hymenostomata;Hymenostomes			0	0.0294118
33340	7496	infraclass	Neoptera					0.0227273	0.0294118
71240	1437183	no rank	eudicotyledons					0.590909	0.264706
71274	1437201	subclass	asterids					0.181818	0.0588235
188550	83145	no rank	Raphignathae					0.047619	0.0294118
431957	5302	class	Wallemiomycetes					0	0.0294118
432003	29000	class	Classiculomycetes					0	0.0294118
451454	4761	class	Monoblepharidomycetes					0.0454545	0
451866	4890	subphylum	Taphrinomycotina					0.363636	0.264706
451879	147545	subclass	Mycocaliciomycetidae					0	0.0294118
452332	5302	class	Dacrymycetes					0.136364	0
1696033	451864	phylum	Entorrhizomycota				Entorrhizomycota R. Bauer, Garnica, Oberw., K. Riess, M. Wei & Begerow, 2015	0.0909091	0.0588235
1913637	112252	phylum	Mucoromycota					0.0238095	0
4209	91882	order	Asterales				Asterales Link, 1829	0.159091	0
7496	85512	subclass	Pterygota					0.0227273	0.0294118
33630	2759	no rank	Alveolata					0	0.0588235
38820	4734	order	Poales					0.0681818	0.911765
83145	6947	infraorder	Eleutherengona		Eleutherengonides			0.047619	0.0294118
1437183	3398	no rank	Mesangiospermae				Mesangiospermae M.J.Donoghue, J.A.Doyle & P.D.Cantino, 2007	0.795455	0.970588
3398	58024	no rank	Magnoliophyta	angiosperms	Angiospermae			0.795455	0.970588
4734	1437197	no rank	commelinids		Commelinidae;Commeliniflorae			0.0681818	0.911765
6947	83136	suborder	Prostigmata					0.047619	0.0294118
85512	50557	no rank	Dicondylia					0.0227273	0.0294118
91882	71274	no rank	campanulids		euasterids II			0.159091	0
50557	6960	class	Insecta					0.0227273	0.0294118
58024	78536	no rank	Spermatophyta	seed plants				0.795455	0.970588
83136	6946	order	Trombidiformes					0.047619	0.0294118
6946	6933	superorder	Acariformes					0.047619	0.0294118
6960	197562	subphylum	Hexapoda					0.0227273	0.0294118
78536	58023	no rank	Euphyllophyta		euphyllophytes			0.795455	0.970588
6933	6854	subclass	Acari		Acarina			0.047619	0.0294118
58023	3193	no rank	Tracheophyta	vascular plants			Tracheophyta Sinnott ex Cavalier-Smith, 1998	0.795455	0.970588
197562	197563	no rank	Pancrustacea					0.0227273	0.0294118
3193	131221	no rank	Embryophyta	higher plants;land plants;plants				0.795455	0.970588
6854	6843	class	Arachnida					0.047619	0.0294118
197563	6656	no rank	Mandibulata	mandibulates				0.0227273	0.0294118
6656	88770	phylum	Arthropoda					0.0681818	0.0588235
6843	6656	subphylum	Chelicerata	chelicerates				0.047619	0.0294118
131221	35493	subphylum	Streptophytina		Charophyta/Embryophyta group;charophyte/embryophyte group			0.795455	0.970588
35493	33090	phylum	Streptophyta				Streptophyta Bremer, 1985	0.795455	0.970588
88770	1206794	no rank	Panarthropoda					0.0681818	0.0588235
1206794	33317	no rank	Ecdysozoa					0.0681818	0.0588235
33317	33213	no rank	Protostomia					0.0681818	0.0588235
33213	6072	no rank	Bilateria					0.0681818	0.0588235
6072	33208	no rank	Eumetazoa					0.0681818	0.0588235
33208	33154	kingdom	Metazoa	multicellular animals	Animalia			0.0681818	0.0588235
-1								0	0.0294118

## Sheet: Sample Location
taxid	parent_taxid	rank	scientific name	common name	synonym	anamorph	authority	Badgingarra	Borden	Buntine	Harrismith	Hyden	Kalannie	Kojonup	Morawa	Mullewa	Newdegate	Nungarin	Pingelly	Toodyay	Walebing	Yoting
1	1	no rank	root		all			1	1	1	1	1	1	1	1	1	1	1	1	1	1	1
2759	131567	superkingdom	Eukaryota	eukaryotes	Eucarya;Eucaryotae;Eukarya;Eukaryotae			1	1	1	1	1	1	1	1	1	1	1	1	1	1	1
3042	3166	order	Chlamydomonadales		Chlorococcales;Volvocales;Volvocida			0	0	0.166667	0.2	0.2	0	0.2	0	0	0	0	0.2	0.666667	0.166667	0
3052	3051	genus	Chlamydomonas					0	0	0	0	0	0	0.2	0	0	0	0	0	0.333333	0.166667	0
3542	3524	family	Aizoaceae	iceplant family			Aizoaceae Martinov, 1820	0	0	0	0	0	0	0	0	0	0.2	0	0	0	0	0
3618	1110386	genus	Rumex				Rumex L., 1753	0	0	0	0	0	0	0	0.166667	0.166667	0	0.166667	0	0	0	0
3700	3699	family	Brassicaceae		Cruciferae		Brassicaceae Burnett, 1835	0.4	0.2	0.166667	0.2	0.2	0.166667	0.2	0.166667	0.666667	0	0.166667	0.2	0.333333	0.166667	0.5
3705	981071	genus	Brassica				Brassica L., 1753	0.2	0.2	0.166667	0.2	0	0.166667	0.2	0	0.166667	0	0.166667	0.2	0.333333	0.166667	0.5
3725	981071	genus	Raphanus				Raphanus L.	0	0	0.166667	0.2	0	0	0	0	0	0	0	0	0	0	0
4496	640623	genus	Avena				Avena L., 1753	0.2	0.2	0.166667	0	0.2	0.166667	0.2	0.166667	0.333333	0.4	0.166667	0.2	0.333333	0.166667	0.25
4501	147388	genus	Bromus				Anisantha K.Koch, 1848;Bromus L., 1753	0.4	0	0	0.2	0	0	0	0	0	0.2	0	0	0	0.166667	0.25
4512	1648017	genus	Hordeum	barleys			Hordeum L., 1753	0	0	0	0.2	0	0.166667	0	0	0	0	0	0	0	0	0
4520	640630	genus	Lolium				Lolium L., 1753	0	0.2	0.166667	0.2	0.2	0.166667	0.2	0.166667	0.166667	0.2	0.166667	0.2	0.333333	0.166667	0
4751	33154	kingdom	Fungi					1	1	1	1	1	1	1	1	1	1	1	1	1	1	1
4815	34479	genus	Spizellomyces					0	0	0	0	0	0	0	0	0	0	0.333333	0	0.333333	0	0
4855	4854	genus	Mortierella					0	0	0	0	0	0	0	0	0	0.2	0	0	0	0	0
4890	451864	phylum	Ascomycota	sac fungi				1	1	1	1	1	1	0.8	1	1	1	1	1	1	1	1
4927	599737	species	Wickerhamomyces anomalus		Candida pelliculosa;Endomyces anomalus;Hansenula anomala;Pichia anomalus;Saccharomyces anomalus;Willia anomala		Saccharomyces anomalus E.C. Hansen, 1889;Wickerhamomyces anomalus (E.C. Hansen) Kurtzman, Robnett & Basehoar-Powers, 2008	0	0	0	0	0	0	0.2	0	0	0	0	0	0	0	0
4930	4893	genus	Saccharomyces		Pachytichospora			0	0	0	0.2	0	0	0.2	0.166667	0.333333	0	0	0	0	0	0
4958	766764	genus	Debaryomyces		Wingea			0	0	0	0.2	0	0	0.2	0	0.166667	0	0	0	0	0	0
4970	1905116	genus	Bullera					0	0.2	0	0.6	0	0	0	0	0	0	0	0.2	0	0.333333	0
4972	165440	species	Dioszegia hungarica		Bullera armeniaca;Cryptococcus hungaricus			0	0.6	0.333333	0.4	0	0	0.6	0	0	0.6	0.166667	0.2	0.333333	0.666667	0.25
4988	1798865	genus	Bensingtonia					0.4	0.4	0.166667	0.2	0.2	0	0	0	0	0.4	0.166667	0	0	0.5	0.5
4990	1798857	species	Pseudobensingtonia ingoldii		Bensingtonia ingoldii		Pseudobensingtonia ingoldii (Nakase & Itoh.) F.Y. Bai, Q.M. Wang, M. Groenew. & Boekhout, 2015	0	0	0	0	0	0	0	0	0	0	0	0	0	0.5	0
4998	1910893	genus	Kockovaella					0	0	0	0.4	0	0	0	0	0	0	0	0	0	0.333333	0
5010	5009	genus	Taphrina		Lalaria			0	0.2	0	0	0	0	0	0	0	0	0	0	0	0	0
5014	451867	order	Dothideales					1	1	1	1	1	1	0.8	0.833333	1	0.8	1	1	1	1	1
5020	715340	family	Phaeosphaeriaceae					1	1	1	1	1	1	0.8	0.833333	1	1	1	1	1	1	1
5021	34374	genus	Leptosphaeria					0.4	0.4	0	1	0.2	0	0.8	0	0.166667	0	0.666667	0.2	0	0.166667	0.5
5022	220671	species	Leptosphaeria maculans	blackleg of canola fungus;blackleg of crucifers fungus	Leptosphaeria sp. JW-2011m	Phoma lingam		0.2	0.4	0	0.4	0	0	0.8	0	0.166667	0	0	0	0	0.166667	0.25
5023	1111111	family	Venturiaceae					0.2	0	0.166667	0.4	0.6	0	0.4	0	0.5	0	0.166667	0.2	0	1	0.5
5024	5023	genus	Venturia					0.2	0	0	0.4	0.6	0	0.4	0	0.333333	0	0.166667	0	0	0.5	0.5
5027	28556	genus	Pyrenophora					0	0	0.666667	0.6	0.4	0.666667	0.2	0.166667	0	0.6	0.666667	0.8	0.666667	0.666667	0.75
5032	62917	genus	Microstroma					0	0	0	0	0	0	0.25	0	0	0	0	0	0	0	0
5042	451871	order	Eurotiales		Elaphomycetales			0.2	0	0.833333	0.4	0	0.333333	0.2	0.166667	0.333333	0	0	0.2	0	0.166667	0.75
5052	1131492	genus	Aspergillus		Petromyces			0	0	0.5	0.2	0	0.333333	0	0	0.166667	0	0	0	0	0.166667	0.25
5073	1131492	genus	Penicillium		Eupenicillium			0.2	0	0.166667	0.2	0	0	0	0	0.166667	0	0	0.2	0	0.166667	0.75
5094	28568	genus	Talaromyces					0	0	0	0	0	0	0.2	0	0	0	0	0	0	0.166667	0
5104	5103	genus	Ascosphaera					0	0	0	0	0	0	0	0	0	0	0	0	0	0	0.25
5112	34397	genus	Epichloe					0	0	0	0	0	0.166667	0	0.166667	0	0	0	0	0	0	0
5114	222544	order	Diaporthales					1	0.8	1	1	1	0.666667	0.6	0.833333	0.666667	0.4	1	0.6	1	1	0.75
5117	5114	family	Valsaceae					0.6	0.2	0.166667	0.6	0.4	0.333333	0.6	0.5	0.333333	0	0.166667	0.2	0.666667	0.833333	0.5
5125	222543	order	Hypocreales					1	1	1	1	1	1	0.6	0.833333	1	1	1	1	1	1	1
5129	5125	family	Hypocreaceae		anamorphic Hypocreaceae			0	0.2	0.166667	0.4	0.4	0.166667	0	0.5	0.333333	0.2	0.166667	0	0.666667	0.5	0.25
5139	222544	order	Sordariales					0.6	0.2	0.666667	0.6	0.6	0.5	0.6	0.333333	0.833333	0.6	0.333333	0.8	0.666667	0.666667	0.75
5144	42302	genus	Podospora					0	0	0	0.2	0	0	0.2	0	0	0	0	0	0.333333	0.166667	0
5146	5148	genus	Sordaria					0	0	0	0	0	0	0	0	0	0.2	0	0	0	0	0
5148	5139	family	Sordariaceae					0.4	0	0.166667	0	0.4	0	0	0.166667	0.333333	0.4	0	0	0.333333	0.333333	0.25
5149	35718	genus	Chaetomium					0	0	0	0.2	0.2	0.166667	0.2	0	0.333333	0	0	0	0	0	0.25
5178	147548	order	Helotiales		Leotiales			1	0.6	0.833333	0.8	0.6	0.666667	0.8	0.5	0.333333	1	0.333333	1	0.666667	1	0.75
5181	5178	family	Helotiaceae					1	0.2	0.166667	0.8	0.2	0	0.6	0	0.333333	0.6	0	0.4	0.666667	0.666667	0.75
5185	147549	order	Pezizales					0.2	0	0.5	0.4	0.6	0.5	0.2	0.5	0.5	0.2	0.5	0.6	0.333333	1	0.25
5186	5185	family	Pezizaceae					0.2	0	0.5	0.4	0.6	0.5	0.2	0.5	0.333333	0.2	0.5	0.6	0.333333	0.666667	0
5198	157822	family	Cladoniaceae					0	0	0	0	0	0	0.2	0	0	0	0	0	0	0	0
5204	451864	phylum	Basidiomycota					1	1	1	1	1	1	1	0.833333	1	1	1	1	1	1	1
5206	1884633	genus	Cryptococcus		Filobasidiella			1	0.8	1	1	1	1	0.8	0.833333	1	1	1	1	1	1	1
5209	5408	genus	Filobasidium					1	1	1	1	1	1	0.8	0.833333	1	1	1	1	1	1	1
5211	1851566	species	Piskurozyma capsuligena		Filobasidium capsuligenum;Leucosporidium capsuligenum		Filobasidium capsuligenum (Fell, Statzell, I.L. Hunter & Phaff) Rodr. Mir., 1972;Leucosporidium capsuligenum Fell, Statzell, I.L. Hunter & Phaff, 1969;Piskurozyma capsuligena (Fell, Statzell, I.L. Hunter & Phaff) A.M. Yurkov, 2016	0	0	0	0	0	0.166667	0.2	0	0	0	0	0	0	0	0
5220	1890237	genus	Trimorphomyces					0.6	0.8	0	0.2	0	0	0.4	0	0	0	0.166667	0.2	0.666667	0.166667	0
5230	5227	genus	Auricularia					0	0	0	0	0	0	0	0	0	0	0	0	0.333333	0	0
5234	155616	order	Tremellales					1	0.8	1	1	1	1	1	0.833333	1	1	1	1	1	1	1
5238	5250	genus	Thanatephorus					0	0	0	0	0	0	0	0	0	0	0	0	0	0	0.25
5246	5245	genus	Septobasidium					0	0	0	0	0	0	0	0	0	0	0	0.2	0.333333	0	0
5250	36064	family	Ceratobasidiaceae					0	0	0.333333	0.2	0.8	0	0	0.166667	0.333333	0	0.333333	0.2	0	0	0.25
5251	5250	genus	Ceratobasidium					0	0	0.166667	0.2	0.8	0	0	0.166667	0.166667	0	0.166667	0	0	0	0
5268	5267	family	Ustilaginaceae					0	0.6	0	0	0	0	0.2	0	0	0.2	0	0	0	0	0.5
5269	5268	genus	Ustilago					0	0.4	0	0	0	0	0.25	0	0	0	0	0	0	0	0
5277	1163720	genus	Leucosporidium		Leucosporidiella;Mastigobasidium			0.2	0.6	0.5	0.6	0.4	0.666667	0.8	0.333333	0	0.4	1	0.8	0.333333	0.833333	0.5
5296	5262	genus	Puccinia					0	1	0.333333	0	0	0.333333	0.4	0.166667	0.166667	0.8	0.166667	0.2	0.333333	0.166667	0
5297	5296	species	Puccinia graminis					0	0.4	0	0	0	0	0.2	0	0	0.2	0	0	0	0	0
5302	5204	subphylum	Agaricomycotina					1	1	1	1	1	1	1	0.833333	1	1	1	1	1	1	1
5303	355688	order	Polyporales		Aphyllophorales			0.4	0.2	0.5	0.2	0.2	0.166667	0.4	0.5	0.166667	0.2	0	0	0	0.666667	0.5
5304	452338	family	Corticiaceae					0	0.2	0.333333	0.2	0.6	0.166667	0.4	0.333333	0.5	0.2	0.333333	0.4	1	0.333333	0.75
5305	396331	genus	Phanerochaete					0	0.2	0	0	0	0	0	0	0	0	0	0	0	0	0.25
5307	81064	genus	Phlebia					0.2	0.2	0	0	0	0	0.2	0	0	0.2	0	0	0	0	0
5317	5303	family	Polyporaceae		Coriolaceae;Cryptoporaceae;Echinochaetaceae;Fomitaceae;Ganodermataceae;Grammotheleaceae;Haddowiaceae;Lentinaceae;Lentinaceae Julich, nom. inval.;Lophariaceae;Microporaceae;Pachykytosporaceae;Perenniporiaceae;Sparsitubaceae;Trametaceae			0	0	0.166667	0	0	0	0.2	0.166667	0	0	0	0	0	0	0
5320	104366	genus	Pleurotus					0	0	0	0.2	0	0	0	0	0	0	0	0	0	0	0.25
5324	5317	genus	Trametes					0	0	0	0	0	0	0	0.166667	0	0	0	0	0	0	0
5338	452333	order	Agaricales		Agaricales anamorphs;Hymenogastrales;Lycoperdales;Nidulariales;Tulostomatales;anamorphic Agaricales			0.4	0.2	0.333333	0.6	0.6	0.166667	0.4	0.333333	0.666667	0.2	0	0.4	1	0.5	0.75
5340	5339	genus	Agaricus					0	0	0.333333	0	0	0	0	0	0	0	0	0	0	0	0
5351	5338	family	Tricholomataceae					0.2	0	0	0.4	0	0.166667	0	0	0.166667	0	0	0	0	0.333333	0
5379	227336	genus	Suillus					0	0	0.166667	0	0	0	0	0	0	0	0	0	0	0	0
5410	165808	genus	Cystofilobasidium					0.4	0.6	0.666667	1	0.2	1	1	0	0.166667	0.8	0.666667	1	0.666667	0.666667	1
5413	165790	genus	Erythrobasidium					0.8	0.2	0.833333	0.2	0.2	0	0	0.166667	1	0	0.333333	0.2	0	0.666667	0.75
5414	5413	species	Erythrobasidium hasegawianum			Rhodotorula hasegawae		0.8	0.2	0.833333	0.2	0	0	0	0.2	0.833333	0	0.166667	0.2	0	0.5	0.5
5418	189450	species	Papiliotrema laurentii		Cryptococcus laurentii;Torula laurentii;Torulopsis laurentii		Papiliotrema laurentii (Kuff.) X.Z. Liu, F.Y. Bai, M. Groenew. & Boekhout, 2016	0	0	0.166667	0	0	0	0	0	0	0	0	0	0.333333	0	0
5427	5426	genus	Lycoperdon					0.2	0.2	0	0	0	0	0	0	0	0	0	0	0	0	0
5429	1799696	genus	Sporobolomyces					0	1	0.333333	0.8	0.4	0.166667	0.8	0.333333	0	1	0	0	0.666667	0.333333	0.25
5434	1798808	species	Symmetrospora foliicola		Sporobolomyces foliicola		Symmetrospora foliicola (R.G. Shivas & Rodr. Mir.) Q.M. Wang, F.Y. Bai, M. Groenew. & Boekhout, 2015	0	0.4	0	0.4	0	0.833333	0	0.333333	0	0	0.666667	0	0	0	0.25
5436	1799786	species	Chrysozyma griseoflava		Sporobolomyces griseoflavus		Chrysozyma griseoflava (Nakase & M. Suzuki) Q.M. Wang, F.Y. Bai, M. Groenew. & Boekhout, 2015	0.4	0	0	0.6	0	0	0	0	0	0.2	0	0.4	0	0	0
5455	681950	genus	Colletotrichum					1	0.6	1	0.6	0.2	0.833333	0.2	0.666667	0.166667	0.6	0.333333	0.6	0.666667	1	0.75
5468	189359	genus	Robillarda					0	0	0	0	0	0	0	0	0	0	0	0	0	0.166667	0
5498	452563	genus	Cladosporium					1	1	1	1	1	1	0.8	0.833333	1	1	1	1	1	1	1
5502	28556	genus	Curvularia					0	0	0	0	0	0.333333	0	0.5	0.166667	0.2	0.5	0.6	0	0	0.25
5506	110618	genus	Fusarium		Gibberella			1	0.8	0.833333	0.6	0.8	0.833333	0.4	0.833333	0.833333	0.4	0.833333	0.8	1	1	0.75
5531	1667166	genus	Myrothecium					0.8	1	0.5	0.4	0.6	1	0	0.5	0.833333	0.4	0.5	1	1	0.833333	1
5533	1799696	genus	Rhodotorula		Rhodosporidium			0.8	0.8	1	0.8	0.6	0.833333	0.8	0.333333	0.333333	0.8	0.666667	0.6	0.666667	1	0.75
5537	5533	species	Rhodotorula mucilaginosa		Rhodotorula mucilaginosa var. mucilaginosa;Rhodotorula pilimanae;Rhodotorula rubra;Sporobolomyces albo-rubescens		Rhodotorula mucilaginosa (A. Jorg.) F.C. Harrison, 1928;Torula mucilaginosa A. Jorg., 1909	0.2	0	0.166667	0	0	0	0	0	0	0	0	0	0	0	0
5538	221903	genus	Scytalidium					0	0	0	0	0	0	0	0	0	0	0	0	0	0	0.25
5543	5129	genus	Trichoderma		Aphysiostroma;Chromocrea;Creopus;Hypocrea;Pseudohypocrea;Sarawakus			0	0	0.166667	0.4	0.2	0.166667	0	0.5	0.333333	0.2	0.166667	0	0.666667	0.333333	0.25
5569	603431	genus	Cenococcum					0	0.2	0	0	0	0	0	0	0	0	0	0	0	0	0.25
5579	1570301	genus	Aureobasidium					1	1	1	1	1	1	0.8	0.833333	1	0.8	1	1	1	1	1
5583	43219	genus	Exophiala		Nadsoniella;Wangiella			0.4	0.6	0.333333	0.6	1	0.333333	0.8	0.333333	0.5	0.4	0.333333	0	0.333333	0.833333	0.75
5587	43219	genus	Rhinocladiella					0	0.2	0.166667	0	0	0	0	0	0.166667	0	0	0	0	0	0
5598	28556	genus	Alternaria		Undifilum			1	1	1	1	1	1	0.8	0.833333	1	1	1	1	1	1	1
5607	1910893	genus	Fellomyces					0	0	0	0	0	0	0	0	0	0	0	0	0	0.166667	0
5615	48847	genus	Sterigmatomyces		Agaricostilbum			0	0	0	0	0	0	0	0	0	0.2	0	0	0	0	0
5909	5890	species	Tetrahymena rostrata				Tetrahymena rostrata Kahl, 1926	0	0	0.166667	0	0	0	0	0	0	0	0	0	0	0	0
13201	1385565	genus	Phaeococcomyces					0.4	0	0.833333	0.4	0.6	0.833333	0.4	0.333333	0.833333	0	0.5	0.4	0.666667	1	0.75
13289	5279	genus	Tilletia					0	0	0	0.4	0	0	0	0	0	0	0	0	0	0	0
13348	47021	genus	Arthrobotrys					0	0	0	0	0	0	0	0	0.166667	0	0	0	0	0	0
15492	1648017	genus	Elymus				Elymus L., 1753	0	0	0	0.2	0	0.166667	0	0	0	0	0	0	0	0	0
21555	4027	genus	Erodium				Erodium L'Her. ex Aiton	0	0	0	0	0	0	0.2	0.166667	0	0	0.166667	0	0	0.166667	0
27311	27310	species	Cephaloascus fragrans					0	0	0	0	0	0	0	0	0	0	0	0	0	0	0
27312	29827	genus	Dipodascopsis					0	0	0	0	0	0	0	0	0	0	0	0	0	0.166667	0
27331	27330	genus	Protomyces					0.8	0.6	0	0.6	0	0	0.4	0	0	0.4	0.333333	0.4	0.333333	0.833333	0.25
27332	27331	species	Protomyces inouyei					0.6	0.4	0	0.6	0	0	0.2	0	0	0	0.333333	0	0.333333	0.666667	0
27344	5296	species	Puccinia coronata				Puccinia coronata Corda 1837	0	0.6	0	0	0	0	0	0	0	0.8	0	0	0	0	0
28556	715340	family	Pleosporaceae		Pyrenophoraceae			1	1	1	1	1	1	0.8	0.833333	1	1	1	1	1	1	1
28568	5042	family	Trichocomaceae		Eurotiaceae			0	0	0	0	0	0	0.2	0	0	0	0	0	0	0.166667	0
28983	5178	family	Sclerotiniaceae					0.2	0	0	0	0	0	0	0	0	0.2	0	0	0	0	0
29000	5204	subphylum	Pucciniomycotina		Urediniomycetes			1	1	1	1	0.8	1	1	0.833333	1	1	1	0.8	1	1	1
29002	93133	genus	Cercospora					0.4	0.2	0.5	0.4	0.2	0.666667	0	0.166667	0.666667	0	0.166667	0	0	0.5	0.25
29820	5185	family	Sarcosomataceae					0	0	0	0	0	0	0	0	0.166667	0	0	0	0	0	0
29827	4892	family	Lipomycetaceae					0	0	0	0	0	0	0	0	0	0	0	0	0	0.166667	0
29828	29827	genus	Lipomyces		Smithiozyma			0	0	0	0	0	0	0	0	0	0	0	0	0	0.166667	0
33154	2759	no rank	Opisthokonta		Fungi/Metazoa group;opisthokonts		Opisthokonta Cavalier-Smith 1987	1	1	1	1	1	1	1	1	1	1	1	1	1	1	1
33183	451871	order	Onygenales		Gymnoascales			0	0	0	0	0	0	0	0	0.166667	0	0	0	0	0	0.25
33184	33183	family	Onygenaceae					0	0	0	0	0	0	0	0	0.166667	0	0	0	0	0	0.25
33194	28556	genus	Bipolaris					0.8	1	1	1	1	1	0.8	0.833333	1	0.8	1	1	0.666667	0.833333	0.75
33198	28556	genus	Drechslera					1	0.2	1	1	0.6	0.333333	0.6	0	0.5	0.6	0.833333	0.4	1	0.833333	0.75
33202	1131624	genus	Paecilomyces					0	0	0.166667	0	0	0	0	0	0	0	0	0	0	0	0
34373	34372	species	Blumeria graminis	grass mildew	Erysiphe graminis			0	0	0.333333	0	0	0.333333	0.2	0.166667	0	0	0	0.2	0	0.166667	0.25
34374	715340	family	Leptosphaeriaceae		Leptosphaeriaceae anamorphs;anamorphic Leptosphaeriaceae			1	0.8	0	1	0.4	0.833333	0.8	0	0.5	0	1	0.8	0.666667	0.5	1
34379	221903	family	Pseudeurotiaceae					0	0	0	0.2	0	0	0	0.166667	0	0	0	0	0	0.166667	0.25
34395	451870	order	Chaetothyriales					1	0.8	1	0.8	1	0.666667	0.8	0.5	1	0.6	0.666667	0.6	1	1	1
34397	5125	family	Clavicipitaceae					0	0	0	0	0	0.166667	0	0.166667	0	0.2	0.166667	0	0	0	0
34399	5117	genus	Phomopsis					0	0	0	0	0	0	0.2	0	0	0	0	0	0.666667	0.166667	0
34416	55071	genus	Microbotryum					0	0	0	0.4	0	0	0.25	0	0	0	0	0	0	0.166667	0
34419	162483	genus	Colacogloea					0	0	0.166667	0.2	0.2	0	0	0	0	0	0	0	0	0	0
34426	5226	family	Exidiaceae					0	0	0	0	0.6	0	0	0	0	0	0	0	0	0.166667	0.25
34448	654128	genus	Marasmius					0	0	0	0	0	0	0	0.166667	0	0	0	0	0.666667	0	0
35718	5139	family	Chaetomiaceae					0.4	0.2	0.333333	0.4	0.4	0.166667	0.2	0.166667	0.833333	0	0.166667	0.6	0.666667	0.5	0.75
35724	45131	genus	Macrophomina					0.2	0	0	0	0	0.333333	0	0	0	0	0	0.4	0	0.166667	0
36054	1798865	genus	Kondoa					0	0.6	0.166667	0	0	0.166667	0.25	0	0.666667	0	0	0	0	0.333333	0
36064	355688	order	Cantharellales		Ceratobasidiales;Tulasnellales			0.2	0	0.333333	0.4	0.8	0.166667	0	0.166667	0.333333	0.2	0.333333	0.2	0.333333	0	0.5
36649	5094	species	Talaromyces aculeatus		Penicillium aculeatum;Penicillium aculeatus		Penicillium aculeatum Raper & Fennell 1948;Talaromyces aculeatus (Raper & Fennell) Samson, Yilmaz, Frisvad & Seifert 2011	0	0	0	0	0	0	0.2	0	0	0	0	0	0	0	0
36913	1535325	genus	Lodderomyces					0.2	0	0	0	0	0	0	0	0	0	0	0	0	0	0
36919	29820	genus	Plectania					0	0	0	0	0	0	0	0	0.166667	0	0	0	0	0	0
36922	767018	genus	Diaporthe					0.8	0.4	0.333333	0.6	0	0.333333	0	0.333333	0.333333	0.4	0.5	0	1	0.166667	0.25
37234	1676655	genus	Spiromastix		Spiromastigoides		Spiromastigoides Doweld, 2013;Spiromastix Kuehn & G.F. Orr, 1962	0	0	0	0	0	0	0	0	0	0	0.166667	0	0	0.166667	0
37463	683158	genus	Phoma					0.2	0.8	0.833333	0.4	0.4	1	0.6	0.333333	0.333333	0.4	0.833333	1	1	1	0.25
37467	227329	genus	Pisolithus					0	0	0	0	0	0	0	0.166667	0.166667	0	0	0	0	0	0
37839	5014	no rank	unclassified Dothideales					1	0.2	0.833333	0.4	0.4	0.833333	0.8	0.5	0.5	0	0.166667	0.8	0.333333	1	0.75
37840	1812776	genus	Pestalotiopsis					0.2	0	0	0.2	0	0.333333	0.2	0	0.166667	0.2	0	0	0	0.166667	0
37884	100025	genus	Rhytidhysteron					0	0.2	0.5	0.4	0	0.166667	0	0	0.333333	0	0	0	0	0	0
37937	744530	genus	Ramichloridium					0.2	0	0.166667	0	0	0	0	0	0	0.2	0	0	0	0	0
37989	222545	order	Xylariales		Sphaeriales			1	0.8	1	1	1	1	0.8	0.833333	1	0.4	1	1	1	1	1
37990	37989	family	Xylariaceae		Sphaeriaceae			0.6	0.2	0.333333	0.2	0.2	0.166667	0	0.166667	0	0	0.5	0.2	0.333333	0.333333	0.25
37991	37990	genus	Xylaria					0.4	0	0	0	0	0	0	0	0	0	0.166667	0	0.333333	0.166667	0.25
38074	388283	order	Ostropales					1	0.4	0.166667	0.4	0.8	0.166667	0.6	0	0.333333	0	0	0.2	0	0.833333	1
38240	5204	no rank	unclassified Basidiomycota		unclassified Teliomycetes;unidentified Basidiomycota			0	0.6	0	0.8	0	0	0.4	0	0	0.8	0	0.2	0.333333	0.166667	0
38452	110844	genus	Rutstroemia					0.4	0	0	0.2	0.2	0	0	0.2	0	0	0.166667	0.2	0.333333	0.166667	0
38464	38462	species	Lambertella subrenispora					0	0	0	0.2	0.4	0	0.5	0	0	0.2	0.166667	0.4	0	0.166667	0
38944	862241	genus	Flammulina					0	0	0	0	0.2	0	0	0	0	0	0	0	0	0	0
39180	5304	genus	Corticium					0	0.2	0	0	0	0	0	0	0	0	0	0	0	0	0
39291	5309	species	Athelia rolfsii		Corticium rolfsii	Sclerotium rolfsii	Athelia rolfsii (Curzi) C.C.Tu et Kimbr.;Corticium rolfsii Curzi	0	0	0	0	0	0	0	0	0	0	0	0	0	0	0.25
39679	39678	genus	Arthonia					0	0.2	0.166667	0	0.2	0	0.5	0	0	0	0	0	0	0	0
39702	93133	genus	Septoria					0.4	0	0.666667	0	0.4	0.833333	0.2	0.166667	0.5	0.4	0.333333	0.2	0	0.333333	0.25
39934	39933	genus	Lecanora					0	0	0	0	0	0	0.2	0	0	0	0	0	0	0	0
39937	1302181	family	Caliciaceae					0	0.2	0.666667	0	0.2	0	0	0.333333	0	0.2	0	0	0.333333	0	0
40219	2126968	genus	Symbiotaphrina		Tromeropsis			0	0	0.333333	0	0	0	0	0	0.166667	0	0	0	0	0	0
40415	1769247	genus	Antrodia					0	0	0	0	0	0	0	0.166667	0	0	0	0	0	0.333333	0
40427	1931355	genus	Ceriporia					0	0	0	0	0.2	0	0	0	0	0	0	0	0	0	0
40463	103393	genus	Peniophora					0	0	0	0	0	0	0	0	0.166667	0	0	0	0.333333	0	0
40593	5186	genus	Peziza					0	0	0	0	0	0	0	0	0.166667	0	0	0	0	0.166667	0
40609	5133	species	Nectria zonata					0	0	0	0	0	0.166667	0	0	0	0	0	0	0.333333	0	0
40654	40653	species	Wallrothiella subiculosa					0.2	0	0	0	0	0	0	0	0	0	0	0	0	0	0
40657	1033978	genus	Plectosphaerella			Plectosporium		0.2	0.4	0.166667	0.4	0	0.833333	0	0	0	0.2	0	1	0.333333	0	0.5
40995	45676	family	Elsinoaceae					0.8	0.2	0.666667	0.8	0.8	0	0.5	0.6	0.833333	0.2	0.166667	0.4	0.333333	0.833333	0
40996	40995	genus	Elsinoe					0.8	0.2	0.666667	0.8	0.8	0	0.5	0.6	0.833333	0.2	0.166667	0.4	0.333333	0.833333	0
41247	2024004	genus	Mycena					0	0	0	0.2	0	0	0	0	0	0	0	0	0.666667	0	0
41254	93133	genus	Mycosphaerella					0	0.2	0	0.6	0.2	0.333333	0.4	0.333333	0.333333	0	0.166667	0.2	0	0.666667	0.5
42302	5139	family	Lasiosphaeriaceae					0.4	0	0.333333	0.4	0	0.333333	0.6	0	0.333333	0.2	0.333333	0.6	0.666667	0.333333	0.5
42303	42302	genus	Cercophora					0	0	0	0	0	0.166667	0	0	0	0	0	0	0	0	0
42364	37989	family	Diatrypaceae					0	0	0	0.2	0.2	0	0	0	0	0	0	0	0	0	0
42658	1851551	genus	Udeniomyces					0	0.2	0	0.8	0.4	1	0.4	0	0	0.2	0.333333	0	0	0	0.25
42660	42658	species	Udeniomyces puniceus		Bullera punicea;Candida punicea		Candida punicea Komag. & Nakase, 1965;Udeniomyces puniceus (Komag. & Nakase) Nakase & Takem., 1992	0	0	0	0.6	0	0.666667	0	0	0	0.2	0.333333	0	0	0	0.25
43083	5186	genus	Plicaria					0	0	0.333333	0	0.4	0.333333	0	0.4	0	0	0.5	0	0.333333	0	0
43216	1572707	family	Tubeufiaceae					0.6	0.4	0.333333	0.4	0	0.5	0.4	0.166667	0	0	0.333333	0.2	0	0.5	0.75
43217	43216	genus	Tubeufia					0	0	0	0	0	0	0	0	0	0	0.166667	0	0	0.166667	0.25
43219	34395	family	Herpotrichiellaceae					1	0.6	1	0.8	1	0.5	0.8	0.5	1	0.6	0.666667	0.6	0.666667	1	1
43220	43219	genus	Capronia					0.2	0	0.166667	0	0	0	0	0	0	0	0	0	0	0	0.25
44624	33159	genus	Helvella					0.2	0	0	0	0	0	0	0	0	0	0	0	0	0.333333	0
44653	77634	genus	Tetracystis				Tetracystis R.M.Brown & Bold, 1964	0	0	0	0	0	0	0	0	0	0	0	0.2	0	0.166667	0
45131	451869	family	Botryosphaeriaceae					0.4	0.2	0.333333	0.4	0.6	0.5	0.2	0.333333	0.5	0	0.666667	0.6	1	0.833333	0.25
45132	45131	genus	Botryosphaeria					0.2	0	0	0	0	0.333333	0	0	0	0	0.333333	0.4	0	0.333333	0
45147	92860	family	Lophiostomataceae					0.8	0.8	0.833333	1	1	0.833333	0.8	0.5	0.833333	0.6	0.5	0.6	0.333333	1	1
45148	45147	genus	Lophiostoma					0.4	0.8	0.833333	1	1	0.833333	0.4	0.333333	0.833333	0.6	0.5	0.6	0.333333	0.833333	0.75
45153	55176	genus	Westerdykella		Eremodothis			0	0	0	0.2	0	0	0	0	0.166667	0	0	0	0	0	0
45307	92860	family	Melanommataceae					0.4	0	0	0.2	0	0.166667	0	0.2	0	0	0	0.2	0	0	0
45426	4890	no rank	unclassified Ascomycota		unidentified Ascomycota			0.2	0.2	0.333333	0.2	0.2	0.333333	0.2	0	0	0	0.333333	0	0.666667	0.166667	0.75
45676	451867	order	Myriangiales					0.8	0.2	0.666667	0.8	0.8	0.333333	0.5	0.6	1	0.4	0.166667	0.4	0.333333	1	0.5
46452	46451	genus	Thelebolus					0.4	0	0	0.8	0	0.5	0	0.2	0.166667	0.2	0	0	0	0.5	0.25
47021	189479	family	Orbiliaceae					0.8	0.2	1	0.8	0.6	0.166667	0.2	0.333333	0.833333	0.4	0.333333	0.4	0.666667	0.333333	1
47022	47021	genus	Orbilia					0.8	0.2	0.666667	0.6	0.6	0.166667	0.25	0.4	0.666667	0.4	0.333333	0.4	0.333333	0.333333	0.75
47167	47166	family	Rhytismataceae					0.8	0.8	0	0.4	0.4	0.166667	0.2	0	0.166667	0.4	0	0.8	0.333333	0.833333	0.25
47197	47196	species	Iodophanus carneus					0.2	0	0	0.2	0.4	0.333333	0	0.2	0.166667	0.2	0.333333	0.6	0.333333	0	0
47274	47021	genus	Dactylaria					0.2	0	0.333333	0.2	0	0	0	0	0	0	0.166667	0	0.333333	0.333333	0.25
47743	5178	family	Hyaloscyphaceae					0.2	0.2	0	0.2	0.6	0	0.2	0.166667	0	0	0.166667	0.4	0	0.166667	0.5
47744	47743	genus	Cistella					0	0.2	0	0.2	0	0	0.2	0	0	0	0.166667	0.4	0	0.166667	0.25
47745	47744	species	Cistella grevillei					0	0	0	0.2	0	0	0	0	0	0	0	0.4	0	0.166667	0.25
47751	47743	genus	Arachnopeziza					0.2	0	0	0	0	0	0	0.166667	0	0	0	0	0	0	0
47817	47743	genus	Lachnum					0	0	0	0	0.2	0	0	0	0	0	0	0	0	0	0
50045	42803	species	Spongiochloris spongiosa				Spongiochloris spongiosa (Vischer) R.C.Starr, 1955	0	0	0.166667	0.2	0.2	0	0.2	0	0	0	0	0	0.666667	0	0
50375	1111112	genus	Fusicladium					0	0	0.166667	0.4	0	0	0	0	0	0	0.166667	0	0	0.666667	0.25
50934	1302181	family	Physciaceae					0	0	0.5	0	0.2	0	0	0.166667	0	0	0	0	0	0	0
50966	5351	genus	Clitocybe					0.2	0	0	0.2	0	0	0	0	0	0	0	0	0	0.166667	0
54695	5178	no rank	unclassified Helotiales		unclassified Leotiales;unidentified Leotiales			0	0	0	0.2	0.2	0	0	0	0	0	0.166667	0	0	0.166667	0.25
54788	290882	genus	Stagonospora		Saccharicola			0.2	0.2	0	0	0	0	0	0.333333	0.166667	0	0	0	0	0	0
54958	37989	family	Amphisphaeriaceae					0.6	0	0	0	0.8	0	0.6	0.166667	0.166667	0	0	0.2	0.333333	0.833333	0
55067	5020	genus	Phaeosphaeria					0.4	0.2	0.5	0	0.4	0.833333	0	0.833333	0.5	0	0.333333	0.6	0	0.833333	0.75
55170	683158	genus	Didymella					0	0.4	0	0.2	0.2	0.166667	0.75	0	0	0.4	0	0.2	0	0	0.25
55176	92860	family	Sporormiaceae					0.8	0.6	0.666667	0.6	0.4	0.666667	0.2	0.333333	1	0.4	0.5	1	0.666667	1	0.75
55178	265084	species	Preussia australis		Sporormiella australis		Sporormiella australis (Speg.) S.I.Ahmed & Cain	0	0.2	0	0	0	0	0	0	0	0	0	0	0	0	0
55193	742845	genus	Malassezia					0.2	0	0.5	0.4	0.2	0.666667	0.4	0.333333	0.5	0.2	0.333333	0	0	0.5	0.25
56178	41954	genus	Limacella					0	0	0.166667	0	0	0	0	0	0	0	0	0	0	0	0
56190	56189	genus	Podaxis					0	0	0	0	0	0	0	0.166667	0	0	0	0	0	0	0
56757	38074	family	Stictidaceae					1	0.4	0	0.2	0.4	0.166667	0.4	0	0.166667	0	0	0.2	0	0.666667	0.5
57474	4970	species	Bullera unica					0	0.2	0	0.6	0	0	0	0	0	0	0	0.2	0	0	0
57687	57692	genus	Fibulobasidium					0	0	0	0	0.2	0	0	0	0	0	0	0	0	0.166667	0.25
57692	5234	family	Sirobasidiaceae					0	0	0.166667	0.6	0.2	0.666667	0	0.333333	0.333333	0	0.333333	0	0	0.333333	0.5
58127	290882	genus	Helminthosporium					0	0	0	0.6	0	0	0	0	0	0	0	0.2	0	0.333333	0
60849	85904	genus	Vorticella					0	0	0	0	0	0	0	0	0	0	0	0	0	0	0
61459	1955842	species	Coniosporium apollinis					0	0	0.166667	0.2	0	0.166667	0	0	0	0	0	0	0	0	0
62074	156300	genus	Sarcinomyces					0	0	0	0.2	0.2	0.166667	0.2	0.166667	0.333333	0	0	0.2	0.333333	0.333333	0
62138	62133	genus	Scorias					0.4	0	0.166667	0	0	0	0	0	0.333333	0	0.166667	0.4	0.333333	0.333333	0.5
62701	34371	genus	Podosphaera					0	0	0.166667	0	0.2	0.5	0.4	0	0	0	0.666667	0.2	0	0.166667	0.25
63255	62911	genus	Entorrhiza					0	0	0	0.2	0	0	0	0	0.166667	0.2	0.166667	0	0.333333	0.166667	0
63298	5268	genus	Pseudozyma					0	0	0	0	0	0	0.2	0	0	0	0	0	0	0	0.5
64357	47167	genus	Lophodermium					0	0.6	0	0	0	0	0	0	0	0.2	0	0	0	0	0
64482	64899	genus	Dothiora					0.2	0.4	0.166667	0.8	0.2	0	0.75	0.2	0	0	0.333333	0.8	0	0.5	0.5
64517	64515	species	Rhizophlyctis rosea		Karlingia rosea			0.2	0	0.166667	0	0	0	0	0	0	0	0.166667	0	0	0	0
64899	5014	family	Dothioraceae		anamorphic Dothioraceae			1	0.6	1	1	0.8	0.5	0.8	0.166667	0.333333	0	0.5	0.8	0	1	0.5
66005	147383	genus	Austrostipa				Austrostipa S.W.L.Jacobs & J.Everett	0.2	0	0	0	0	0	0	0	0	0	0	0	0	0	0.25
66029	147379	genus	Microlaena				Microlaena R.Br., 1810	0.2	0	0	0	0	0.166667	0	0	0	0	0	0	0	0	0
66516	1484953	family	Phacidiaceae					0.6	0.2	0	0.4	0.6	0.166667	0.6	0	0	0	0.166667	0.6	0	0.666667	0.25
66611	34395	family	Chaetothyriaceae					0.2	0	0	0	0.4	0.166667	0	0	0.166667	0	0	0	0	0.166667	0.25
66739	45131	genus	Lasiodiplodia					0	0	0	0.2	0	0	0.2	0	0.333333	0	0	0	0	0	0
67608	1682405	genus	Microdochium					0.2	0.2	0.166667	0	0	0.166667	0.4	0.333333	0	0	0	0.8	0	0.166667	0.25
68764	68763	genus	Geastrum					0	0	0	0	0	0	0	0	0	0	0	0	0	0	0.25
68795	68793	species	Botryobasidium subcoronatum					0	0	0	0	0	0	0	0	0	0	0	0	0	0	0.25
68802	5304	genus	Hyphodontia					0	0.2	0	0	0.4	0.166667	0	0	0	0	0	0.2	0.666667	0.166667	0
68809	68808	genus	Typhula					0	0.2	0	0	0	0	0	0	0	0	0	0	0	0	0
71598	38074	family	Graphidaceae		Fissurinaceae;Thelotremataceae		Graphidaceae Dumort., 1822	0.2	0.2	0.166667	0.2	0.6	0	0.5	0	0	0	0	0	0	0.666667	0.25
71779	57692	genus	Sirobasidium					0	0	0.166667	0.6	0	0.666667	0	0.333333	0.333333	0	0.333333	0	0	0.166667	0.25
71780	71779	species	Sirobasidium magnum				Sirobasidium magnum Boedijn, 1934	0	0	0	0	0	0	0	0	0	0	0	0	0	0.166667	0
71913	5351	genus	Resupinatus					0	0	0	0.2	0	0.166667	0	0	0	0	0	0	0	0.166667	0
71937	71934	genus	Entoloma					0	0	0	0	0.4	0	0	0	0	0	0	0	0	0	0
72117	5338	family	Omphalotaceae					0	0	0	0	0.2	0	0	0	0	0	0	0	0	0	0
72305	40111	genus	Dirina					0	0	0	0	0	0	0	0	0.166667	0	0	0	0	0	0
72306	72305	species	Dirina catalinariae					0	0	0	0	0	0	0	0	0.166667	0	0	0	0	0	0
73565	73564	species	Aporospora terricola					0	0	0	0	0	0	0	0	0.166667	0	0	0	0	0	0
74721	1667166	genus	Stachybotrys					0	0	0	0	0	0	0	0	0.166667	0	0	0	0	0	0
75749	75748	species	Glomerobolus gelineus					0	0.4	0	0.2	0.2	0	0.4	0	0.166667	0	0	0.2	0	0	0.25
76657	5178	family	Dermateaceae					0.2	0	0	0.2	0.2	0	0	0	0	0.2	0	0	0	0	0
76773	55193	species	Malassezia globosa					0	0	0	0	0	0	0	0	0.166667	0	0	0	0	0	0
78060	157822	family	Parmeliaceae		Alectoriaceae;Anziaceae			0.2	0.4	0.666667	0.2	0.8	0	0	0.333333	0.333333	0	0	0	0.666667	0	0
78141	37240	genus	Oidiodendron					0	0	0.166667	0	0.2	0	0	0	0	0	0	0	0	0	0
79807	292576	family	Coniochaetaceae					0.8	0.2	0.666667	0.4	0.8	0.666667	0.2	0.333333	0.833333	0.4	0.333333	0.6	1	0.833333	1
79808	79807	genus	Coniochaeta		Lecythophora			0.8	0.2	0.666667	0.4	0.8	0.666667	0.2	0.166667	0.833333	0.4	0.333333	0.6	0.666667	0.833333	1
80628	452334	family	Atheliaceae					0	0	0	0	0	0	0	0	0	0	0	0	0	0	0.25
81064	5303	family	Meruliaceae		Climacodontaceae;Phlebiaceae			0.2	0.2	0.166667	0	0	0	0.2	0	0	0.2	0	0	0	0.166667	0
81065	1931355	genus	Gloeoporus					0	0.2	0	0	0	0.166667	0	0.166667	0	0	0	0	0	0	0
82105	43219	genus	Cladophialophora					0.4	0.2	0	0.4	0.4	0.166667	0.2	0	0.333333	0.4	0.333333	0	0.333333	0.5	0.75
82268	82267	species	Hyaloraphidium curvatum					0	0	0	0	0	0	0	0	0	0	0	0	0	0	0
84755	1804794	species	Kalmanozyma fusiformata		Candida fusiformata;Pseudozyma fusiformata		Kalmanozyma fusiformata (Buhagiar) Q.M. Wang, F.Y. Bai, Begerow & Boekhout, 2016	0	0	0	0	0	0	0	0	0	0.2	0	0	0	0	0
86830	5277	species	Leucosporidium fragarium		Candida fragaria;Leucosporidiella fragaria;Rhodotorula fragaria;Rhodotorula fragariae;Torulopsis fragaria;Torulopsis fragariae;Vanrija fragaria;Vanrijia fragaria		Leucosporidiella fragaria (J.A. Barnett & Buhagiar) J.P. Samp., 2003;Leucosporidium fragarium (J.A. Barnett and Buhagiar) V. de Garcia, M. A. Coelho, T. Maia, L. H. Rosa, A. M. Vaz, C. A. Rosa, J. P. Sampaio, P. Gonalves, M. R. van Broock and D. Libkind, 2015;Torulopsis fragariae J.A. Barnett & Buhagiar, 1971	0	0	0	0.4	0	0	0.2	0	0	0	0	0.2	0	0	0
88639	388283	order	Pertusariales					0.2	0.2	0	0	0	0	0	0	0	0	0	0	0	0	0
88646	1302176	family	Teloschistaceae					0.2	0	0.333333	0	0	0	0	0	0	0	0	0	0	0	0.25
88746	157821	family	Acarosporaceae					1	0.4	0.166667	0.8	1	0.333333	0.2	0.166667	0.166667	0.6	0.333333	0	0.333333	0.666667	0.75
88747	88746	genus	Acarospora					1	0.4	0.166667	0.8	1	0.166667	0.2	0	0.166667	0.6	0.333333	0	0.333333	0.666667	0.75
89443	4751	no rank	unclassified Fungi					1	0.8	0.833333	1	0.8	1	0.6	0.666667	1	0.6	0.666667	0.6	1	1	1
90676	5426	genus	Bovista					0	0	0	0	0	0	0	0	0.166667	0	0	0	0	0	0
90886	155616	order	Filobasidiales					1	1	1	1	1	1	0.8	0.833333	1	1	1	1	1	1	1
91806	1520784	genus	Trapelia					0	0	0.166667	0	0.2	0	0	0	0	0	0	0	0	0	0
91984	106022	species	Sakaguchia lamellibrachiae		Rhodotorula lamellibrachiae		Sakaguchia lamellibrachiae (Nagah., Hamam., Nakase & Horikoshi) Q.M. Wang, F.Y. Bai, M. Groenew. & Boekhout, 2015	0.8	0.2	0.166667	0.6	0	0.166667	0	0	0.166667	0	0	0.6	0	0.666667	0
92860	451868	order	Pleosporales					1	1	1	1	1	1	0.8	0.833333	1	1	1	1	1	1	1
92862	92860	no rank	unclassified Pleosporales					1	0.8	0.5	1	0.2	1	0.6	0.666667	0.833333	0.8	0.833333	0.6	0.666667	0.833333	0.75
92987	129384	genus	Phaeotheca					0	0	0.333333	0	0	0	0	0	0	0	0.166667	0	0	0	0
93133	134362	family	Mycosphaerellaceae					1	0.6	0.833333	1	0.8	1	0.6	0.666667	0.833333	0.8	0.333333	0.6	0.666667	1	1
95331	34379	genus	Pseudeurotium					0	0	0	0.2	0	0	0	0.166667	0	0	0	0	0	0	0
95729	28556	genus	Stemphylium					1	1	1	1	1	1	0.6	0.833333	1	0.8	1	1	1	1	0.75
97971	1898439	genus	Periconia					0	0.2	0.666667	0	0	0	0.2	0.166667	0.5	0	0.166667	0.2	0.666667	0.333333	0.25
100025	191554	family	Hysteriaceae					0	0.4	0.833333	0.4	0.2	0.5	0	0	0.333333	0	0	0	0	0	0.5
100032	715298	genus	Keissleriella					1	0.6	0.166667	0.8	0.2	1	0.6	0.333333	0.666667	0.6	0.5	0.4	0.333333	0.666667	1
100035	100034	species	Massariosphaeria phaeospora					0	0	0	0.2	0	0	0	0	0	0	0	0	0	0	0
101853	76657	genus	Pezicula					0.2	0	0	0.2	0	0	0	0	0	0	0	0	0	0	0
103376	452342	family	Stereaceae					0	0	0.166667	0	0	0	0	0	0.166667	0	0	0	0	0	0
103886	261460	family	Chaetosphaeriaceae					1	0.6	0.666667	0.8	0.6	0.5	0.4	0.5	0.5	0.4	0.5	0.6	0.666667	0.666667	1
103887	5125	family	Bionectriaceae		anamorphic Bionectriaceae			0	0.2	0.166667	0	0	0.666667	0	0	0.333333	0	0.333333	0	0	0.166667	0
104247	452226	genus	Candelariella					0	0	0.166667	0	0	0	0	0	0	0	0	0	0	0	0.25
104351	104350	genus	Crepidotus					0	0	0	0	0	0	0	0	0	0	0	0	0	0	0.25
104397	683158	genus	Epicoccum		Cerebella			1	1	0.5	0.8	0.8	0.166667	0.6	0	0.666667	0.6	0.666667	0.8	1	1	0.75
105767	5215	genus	Tremella					1	0.6	1	0.8	0.6	1	0.6	0.666667	0.5	0.8	0.833333	0.8	1	1	1
105996	1611264	genus	Occultifur				Occultifur Oberw., 1990	0	0.2	0	0	0	0	0	0	0	0	0	0	0	0	0
106001	1798813	species	Buckleyzyma armeniaca		Rhodotorula armeniaca		Buckleyzyma armeniaca (R.G. Shivas & Rodr. Mir.) Q.M. Wang, F.Y. Bai, M. Groenew. & Boekhout, 2015	0.2	0.2	0	0	0	0	0.4	0	0.333333	0	0	0.2	0.333333	0	0
106008	256806	species	Curvibasidium cygneicollum		Candida fujisanensis;Torulopsis fujisanensis;Vanrija fujisanensis		Curvibasidium cygneicollum J.P. Samp., 2004	0.4	0.4	0.5	0.8	0.2	0.5	0.75	0	0.333333	0.2	0.166667	0.8	0.333333	0.833333	0.5
106010	1801565	species	Sampaiozyma ingeniosa		Candida ingeniosa;Rhodotorula ingeniosa;Torulopsis ingeniosa;Vanrija ingeniosa;Vanrijia ingeniosa		Rhodotorula ingeniosa (Di Menna) Arx & Weijman, 1979;Sampaiozyma ingeniosa (Di Menna) Q.M. Wang, F.Y. Bai, M. Groenew. & Boekhout, 2015;Torulopsis ingeniosa Di Menna, 1958	1	0.6	0.666667	1	0.6	0.833333	1	0.2	0.333333	0.4	0.666667	0.8	1	0.833333	0.5
106019	1803523	species	Yunzhangia sonckii		Candida sonckii;Rhodotorula sonckii;Vanrija sonckii;Vanrijia sonckii		Candida sonckii Hopsu-Havu, Tunnela & Yarrow, 1978;Rhodotorula sonckii (Hopsu-Havu, Tunnela & Yarrow) Rodr. Mir. & Weijman, 1988;Yunzhangia sonckii (Hopsu-Havu, Tunnela & Yarrow) Q.M. Wang, F.Y. Bai, M. Groenew. & Boekhout, 2015	0.8	0.4	0.166667	0.2	0.4	0.166667	0	0	0	0	0.166667	0	0	0.5	0.25
106022	460509	genus	Sakaguchia					0.8	0.2	0.166667	0.6	0.2	0.333333	0	0	0.166667	0	0.333333	0.6	0.333333	0.666667	0.25
106023	106022	species	Sakaguchia dacryoidea		Rhodosporidium dacryoideum;Rhodosporidium dacryoidum		Sakaguchia dacryoidea (Fell, I.L. Hunter & Tallman) Y. Yamada, K. Maeda & Mikata, 1994	0	0	0	0	0	0.166667	0	0	0	0	0.333333	0.2	0	0	0.25
106263	37989	family	Apiosporaceae					0.2	0	0	0	0	0	0	0	0	0	0.166667	0.2	0	0	0
106814	4496	species	Avena macrostachya				Avena macrostachya Balansa ex Coss. & Durieu	0	0	0	0	0	0.166667	0	0	0	0	0	0.2	0	0	0
109764	109763	species	Harpochytrium sp. JEL94					0	0	0	0.2	0	0	0	0	0	0	0	0	0	0.166667	0
109893	1134080	genus	Powellomyces					0	0	0	0.2	0	0.166667	0	0	0	0	0	0	0	0	0
110564	103887	genus	Clonostachys					0	0	0	0	0	0.333333	0	0	0	0	0	0	0	0	0
110586	29865	species	Nectriopsis violacea					0	0.2	0.166667	0	0	0.5	0	0	0	0	0.333333	0	0	0.166667	0
110618	5125	family	Nectriaceae					1	0.8	1	0.6	0.8	0.833333	0.4	0.833333	1	0.4	0.833333	0.8	1	1	0.75
110844	5178	family	Rutstroemiaceae					0.4	0	0	0.4	0.4	0.166667	0.6	0.166667	0.333333	0.2	0.333333	0.8	0.333333	0.5	0
111621	78060	genus	Xanthoparmelia		Chondropsis;Neofuscelia;Paraparmelia			0	0	0	0	0.2	0	0	0	0	0	0	0	0.666667	0	0
112072	112071	species	Naohidea sebacea		Dacrymyces sebaceus		Dacrymyces sebaceus Berk. & Broome, 1871;Naohidea sebacea (Berk. & Broome) Oberw., 1990	0	0	0	0	0	0	0	0	0	0	0.166667	0.2	0	0	0
112133	5181	genus	Crocicreas		Cyathicula			0.2	0	0.166667	0	0	0	0	0	0	0	0	0	0	0.166667	0.25
112488	744530	genus	Dissoconium					0	0.2	0	0	0	0	0.4	0	0	0.2	0	0	0.333333	0	0
112497	93133	genus	Ramularia					0	0.2	0.166667	0.2	0.4	0	0.2	0.166667	0.166667	0.2	0	0	0	0.166667	0.5
114230	152648	genus	Nigrospora					0.2	0.2	0.166667	0	0.2	0	0	0.333333	0.166667	0.2	0	0	0	0.166667	0
115234	110618	genus	Cosmospora					0	0	0.166667	0	0	0	0	0	0	0	0	0	0.333333	0	0
116791	111584	species	Buellia disciformis					0	0	0	0	0	0	0	0	0	0	0	0	0.333333	0	0
116799	50934	genus	Phaeophyscia				Phaeophyscia Moberg, 1977	0	0	0	0	0.2	0	0	0.166667	0	0	0	0	0	0	0
117058	71934	genus	Rhodocybe					0	0	0	0	0	0	0	0	0	0	0	0	0	0	0.25
117544	5117	genus	Cytospora					0.6	0.2	0.166667	0.6	0.4	0.333333	0.6	0.5	0.333333	0	0.166667	0.2	0.333333	0.666667	0.5
117816	34479	genus	Kochiomyces					0	0	0	0	0	0	0	0	0.166667	0	0	0	0	0	0
117818	4815	species	Spizellomyces dolichospermus					0	0	0	0	0	0	0	0	0	0	0.333333	0	0	0	0
118273	1406929	genus	Lecophagus					0.2	0	0	0	0	0	0	0	0	0	0	0	0	0	0
121621	1424649	genus	Phyllosticta					0	0	0	0	0	0	0	0	0	0	0	0	0	0.833333	0
124095	39941	species	Mycocalicium victoriae					0	0	0	0	0	0	0	0	0	0	0	0	0	0	0.25
125369	221678	genus	Paraphaeosphaeria					0	0.4	0	0	0	0	0	0	0	0	0	0	0	0.166667	0
131324	93133	genus	Pseudocercospora					0	0	0.166667	0	0.2	0	0	0	0	0	0	0	0	0	0
131338	37990	genus	Anthostomella					0	0	0	0	0	0.166667	0	0	0	0	0.5	0	0	0	0
132098	33198	species	Drechslera campanulata					1	0.2	0	1	0.2	0	0.6	0	0.166667	0	0.5	0	0.666667	0.833333	0.5
134362	451867	order	Capnodiales					1	1	1	1	1	1	0.8	0.833333	1	1	1	1	1	1	1
134502	1769459	genus	Chaetomella					0	0	0	0	0	0	0	0	0	0	0.166667	0	0	0	0
136167	46635	species	Hormonema sp. F-054,258					0.8	0.4	0.333333	0.8	0.6	0.5	0.8	0	0.333333	0	0.166667	0.4	0	1	0.5
136422	5263	species	Uromyces striatus					0	0	0	0	0	0	0	0	0	0	0	0	0	0	0.25
138063	1812776	genus	Seiridium					0.2	0	0	0	0	0	0	0	0	0.2	0	0	0	0.166667	0
139131	5304	genus	Sistotrema					0	0	0	0	0	0	0.4	0	0	0	0	0	0	0	0
139133	1229510	genus	Sistotremastrum					0	0.4	0	0	0	0	0	0	0	0	0	0	0	0	0
139134	139133	species	Sistotremastrum niveocremeum					0	0.2	0	0	0	0	0	0	0	0	0	0	0	0	0
139159	1931355	genus	Byssomerulius					0	0	0	0.2	0	0	0	0	0	0	0	0	0	0	0
139171	139141	species	Tubulicrinis sp. GEL5046					0	0	0.166667	0	0	0	0	0	0	0	0	0	0.333333	0.166667	0
139231	33198	species	Drechslera nobleae					0	0	0	0.2	0.2	0.166667	0	0	0.166667	0	0.333333	0	0	0.166667	0
143937	76657	genus	Neofabraea					0	0	0	0	0.2	0	0	0	0	0	0	0	0	0	0
146292	146291	family	Verrucariaceae		Mastodiaceae		Mastodiaceae Zahlbr. 1907;Verrucaria Schrad., 1794	0.2	0	0.166667	0	0.2	0	0	0.166667	0	0	0.166667	0	0.333333	0.333333	0
147498	92860	no rank	Pleosporales incertae sedis					1	0.8	0.333333	1	0.8	0.833333	0.4	0.166667	0.666667	0.4	0.666667	1	0.666667	0.833333	1
147538	716545	subphylum	Pezizomycotina		Euascomycota			1	1	1	1	1	1	0.8	0.833333	1	1	1	1	1	1	1
147539	715962	class	Arthoniomycetes					0.8	0.6	1	0.6	1	0.833333	0.6	0.333333	0.833333	0.2	0.5	0.4	1	1	0.75
147541	715962	class	Dothideomycetes					1	1	1	1	1	1	0.8	0.833333	1	1	1	1	1	1	1
147545	716546	class	Eurotiomycetes					1	0.8	1	0.8	1	0.833333	0.8	0.5	1	0.6	0.666667	0.8	1	1	1
147547	716546	class	Lecanoromycetes					1	0.8	1	1	1	0.666667	0.6	0.666667	0.666667	0.6	0.666667	0.2	1	0.833333	1
147548	715989	class	Leotiomycetes					1	1	0.833333	1	1	0.833333	0.8	0.5	0.5	1	0.666667	1	0.666667	1	1
147550	715989	class	Sordariomycetes					1	1	1	1	1	1	0.8	0.833333	1	1	1	1	1	1	1
150498	147550	no rank	unclassified Sordariomycetes					0.4	0	0.5	0.2	0.6	0	0	0.166667	0.5	0.2	0.166667	0.2	0	0.5	0.75
152622	37990	genus	Muscodor					0	0	0	0	0	0	0	0.2	0	0	0	0	0	0	0
154566	1344078	genus	Marchandiomyces					0.2	0	0.166667	0	0	0	0	0	0	0	0	0.2	0	0.166667	0.25
155415	110158	genus	Monosporascus					0	0	0	0	0	0	0	0	0	0	0	0.2	0	0	0.25
155416	155415	species	Monosporascus cannonballus					0	0	0	0	0	0	0	0	0	0	0	0	0	0	0.25
155616	5302	class	Tremellomycetes		Heterobasidiomycetes			1	1	1	1	1	1	1	0.833333	1	1	1	1	1	1	1
155619	5302	class	Agaricomycetes					1	0.8	0.666667	0.6	1	0.833333	0.6	0.666667	0.833333	0.6	0.5	0.8	1	0.666667	1
156596	1229510	genus	Trechispora					0.2	0	0	0.2	0	0	0	0	0	0	0	0	0	0	0
157253	157252	species	Muribasidiospora indica					0	0.2	0	0	0	0	0	0	0	0	0	0	0	0	0
158045	1618111	genus	Phaeomoniella					0	0.4	0.5	0.6	0.4	0.666667	0	0.333333	0.333333	0	0	0.2	0.666667	0.666667	0.25
159075	162454	genus	Acremonium					0	0	0	0	0	0.166667	0	0	0	0.2	0.5	0	0.666667	0.166667	0.25
159638	147548	no rank	unclassified Leotiomycetes					1	0	0	0.2	0.2	0	0.2	0	0	0.2	0.166667	0	0	0.5	0.25
159639	5178	no rank	Helotiales incertae sedis					0	0	0	0	0	0	0	0	0	0.2	0	0.4	0	0	0.5
159987	147541	no rank	Dothideomycetes incertae sedis					1	0.6	1	1	0.8	0.666667	0.6	0.666667	0.666667	0.2	1	1	1	1	1
160893	160892	species	Ceratosebacina calospora					0	0	0	0	0	0	0	0	0	0	0	0	0	0	0.25
162405	1910953	genus	Bartalinia					0.2	0	0	0	0	0	0	0	0	0	0	0	0.666667	0	0
162418	54958	genus	Seimatosporium					0.4	0	0	0	0.8	0	0.6	0.166667	0.166667	0	0	0.2	0.333333	0.833333	0
162454	5125	no rank	Hypocreales incertae sedis					0.6	0.2	0	0.4	0	1	0	0.166667	0	0.6	0.5	0.6	1	0.5	0.5
162475	452283	order	Microstromatales					0.2	0.2	0	0	0	0	0.6	0	0	0	0	0.4	0	0.333333	0
162477	162475	no rank	Microstromatales incertae sedis					0	0	0	0	0	0	0.4	0	0	0	0	0.4	0	0	0
162481	29000	class	Microbotryomycetes		Microbotryomycetidae			1	1	1	1	0.8	1	1	0.833333	0.833333	1	1	0.8	1	1	1
163257	45147	genus	Vaginatispora					0.2	0	0.166667	0.2	0.2	0.166667	0	0	0.166667	0	0	0	0	0.166667	0.25
164535	129384	genus	Tetracladium					0.8	1	0.5	0.8	0.6	1	0.6	0	0.666667	0.8	0.833333	1	0.666667	0.5	1
165440	1884640	genus	Dioszegia					1	0.8	0.833333	0.8	0.6	1	0.8	0.833333	0.833333	0.6	0.833333	1	1	1	1
165790	432006	family	Erythrobasidiaceae				Erythrobasidiaceae Denchev 2009	0.8	0.4	0.833333	0.4	0.4	0	0	0.166667	1	0	0.333333	0.2	0	0.666667	0.75
171627	5506	no rank	Fusarium fujikuroi species complex		Gibberella fujikuroi complex			0	0	0	0	0	0	0	0	0	0	0	0	0	0	0
172190	1535530	genus	Coniella		Pilidiella			0.8	0	0	0	0	0	0	0	0	0	0.833333	0.6	0	0.5	0.25
172618	78060	genus	Hypotrachyna					0	0	0	0.2	0.6	0	0	0.2	0	0	0	0	0	0	0
173137	40593	species	Peziza michelii					0	0	0	0	0	0	0	0	0.166667	0	0	0	0	0.166667	0
173150	5186	genus	Ruhlandiella					0	0	0.166667	0	0	0	0	0	0	0	0	0	0	0.666667	0
175500	66029	species	Microlaena avenacea		Ehrharta diplax		Ehrharta diplax F.Muell.;Microlaena avenacea (Raoul) Hook.f.	0.2	0	0	0	0	0.166667	0	0	0	0	0	0	0	0	0
175855	40424	genus	Fuscoporia					0	0	0	0	0	0	0	0	0	0.2	0	0	0	0	0
176137	5186	no rank	unclassified Pezizaceae		unclassified Terfeziaceae			0.2	0	0	0	0	0	0	0	0	0	0	0	0	0	0
177194	221903	genus	Hyphozyma					0	0	0	0	0	0	0	0	0	0	0	0	0	0.166667	0
178737	37990	genus	Arthroxylaria					0	0	0.166667	0	0	0	0	0	0	0	0	0	0	0	0
181926	5320	species	Pleurotus australis					0	0	0	0.2	0	0	0	0	0	0	0	0	0	0	0
184430	184208	genus	Coprinellus					0	0	0	0.2	0	0	0.4	0	0	0.2	0	0.4	0	0.166667	0.5
184431	184208	genus	Coprinopsis					0	0	0	0	0.2	0	0	0	0.333333	0	0	0	0	0	0
187248	1171044	genus	Harknessia					0.8	0.4	0.333333	0.6	0.4	0	0	0.166667	0	0.2	0.166667	0.6	0.333333	1	0
188545	188544	species	Demodex canis				Demodex canis Leydig, 1859	0	0	0	0	0	0.333333	0.25	0	0	0	0	0	0	0	0
189359	37989	no rank	Xylariales incertae sedis					1	0.6	1	1	1	1	0.8	0.666667	0.833333	0	0.666667	1	1	1	1
189450	1581159	genus	Papiliotrema					1	0.6	1	0.8	0.6	0.666667	0.6	0.666667	0	0.2	0.833333	0.8	1	0.833333	1
190626	5296	species	Puccinia malvacearum					0	0.2	0	0	0	0	0	0	0	0	0	0	0	0	0
195053	103376	genus	Megalocystidium					0	0	0	0	0	0	0	0	0.166667	0	0	0	0	0	0
195797	195796	species	Ramalea cochleata					0	0	0	0	0	0	0.2	0	0	0	0	0	0	0	0
203525	34418	genus	Cystobasidium					0.6	0.6	0.5	0.4	0	0.333333	0.2	0	0.5	0	0.333333	0.8	0	0.166667	0.75
209472	209470	species	uncultured Pleosporales		uncultured ectomycorrhiza (Pleosporales)			0	0	0.166667	0	0	0	0	0	0	0	0	0	0	0	0
209473	147541	no rank	unclassified Dothideomycetes					0.6	0.4	0.666667	0.6	0.4	0.166667	0.4	0	0.666667	0.2	0.166667	0.4	0.333333	1	0.5
218105	399129	no rank	Cryphonectria-Endothia species complex					0	0	0	0	0	0	0	0	0	0	0	0	0	0	0.25
218126	426519	genus	Quambalaria					0.2	0.2	0	0	0	0	0.2	0	0	0	0	0	0	0.333333	0
220344	5206	species	Cryptococcus sp. Pro94-Y57					0	0	0.833333	0	0	0.166667	0	0.2	0	0.2	0.166667	0	0	0.333333	0
220671	5021	no rank	Leptosphaeria maculans species complex					0.4	0.4	0	0.4	0.2	0	0.8	0	0.166667	0	0.166667	0	0	0.166667	0.5
220672	220671	species	Leptosphaeria biglobosa					0.2	0	0	0	0.2	0	0	0	0	0	0.166667	0	0	0	0.5
221670	715340	family	Cucurbitariaceae					0.6	0.8	0.666667	0.4	0.2	0	0	0	0	0.2	0	0.2	0	0.333333	0.75
221678	1255046	family	Didymosphaeriaceae		Montagnulaceae			1	1	1	0.8	1	0.833333	0.8	0.833333	1	1	0.666667	1	0.666667	1	1
221900	47166	family	Cudoniaceae					0	0	0	0	0	0	0.25	0	0	0	0	0	0	0	0
221903	147548	no rank	Leotiomycetes incertae sedis					0.2	0	0.166667	0.2	0.2	0	0	0.166667	0	0	0	0	0	0.333333	0.25
222543	147550	subclass	Hypocreomycetidae					1	1	1	1	1	1	0.6	0.833333	1	1	1	1	1	1	1
222544	147550	subclass	Sordariomycetidae					1	1	1	1	1	0.666667	0.8	0.833333	1	1	1	0.8	1	1	1
223428	1520784	genus	Xylographa					0	0	0.166667	0	0	0	0	0	0	0	0	0	0	0	0
223899	5181	genus	Tricladium					0	0	0	0.2	0	0	0	0	0	0	0	0	0.666667	0	0
224419	147498	genus	Shiraia					0	0	0	0	0	0.166667	0.2	0.166667	0	0	0	0	0	0	0
226117	5531	species	Myrothecium gramineum		Xepiculopsis graminea			0	0.8	0	0	0	0	0	0	0	0	0	0	0	0	0
226122	5531	species	Myrothecium lachastrae					0	0	0	0	0	0	0	0	0.166667	0	0	0	0.666667	0	0
226991	1341112	genus	Cyphellophora					0.8	0.4	0.166667	0	0	0.166667	0	0.166667	0.166667	0	0	0	0	0	0.25
227067	221678	genus	Spegazzinia					0.2	0	0	0.4	0.2	0	0	0.166667	0.666667	0	0.166667	0.8	0.333333	0	0.25
228211	5020	genus	Phaeosphaeriopsis					0.6	0	0	0	0	0	0	0	0	0	0.333333	0	0	0	0
228943	228942	species	Limonomyces roseipellis					0	0	0.166667	0	0	0.166667	0	0.4	0.5	0	0	0	0	0	0
228944	228942	species	Limonomyces culmigenus					0	0	0.166667	0.2	0.6	0	0	0	0	0.2	0.333333	0.4	0	0.166667	0.75
231212	162481	order	Leucosporidiales					0.2	0.6	0.5	0.6	0.4	0.666667	0.8	0.333333	0	0.4	1	0.8	0.333333	0.833333	0.5
231213	162481	order	Sporidiobolales		Sporidiaceae			0.8	1	1	1	0.6	0.833333	1	0.5	0.333333	1	0.666667	0.6	0.666667	1	0.75
232773	56757	genus	Absconditella					0	0	0	0	0.2	0	0	0	0	0	0	0	0	0	0
237031	78060	genus	Canoparmelia					0.2	0	0	0	0	0	0	0	0	0	0	0	0	0	0
237584	668547	genus	Teratosphaeria					0.8	0.8	0.5	0.2	0	0.333333	0.2	0.166667	0.833333	0.4	0	0.6	1	0.833333	0.5
237593	470130	species	Catenulostroma elginense		Trimmatostroma elginense			0	0	0	0.2	0	0	0	0	0.166667	0	0	0	0	0	0
243023	34397	genus	Pochonia					0	0	0	0	0	0	0	0	0	0.2	0	0	0	0	0
245174	148959	species	Wallemia ichthyophaga		Wallemia ichthiophaga		Wallemia ichthyophaga Johan-Olsen	0	0	0	0	0	0	0	0	0	0	0	0	0.333333	0	0
248099	248098	species	Asterothyrium longisporum					0.2	0	0.166667	0.2	0.6	0	0.5	0	0	0	0	0	0	0.666667	0.25
252155	42302	genus	Schizothecium					0.4	0	0	0.2	0	0.333333	0.5	0	0.166667	0.2	0.333333	0.6	0.333333	0	0.5
252690	109893	species	Powellomyces sp. EA					0	0	0	0	0	0.166667	0	0	0	0	0	0	0	0	0
255703	203525	species	Cystobasidium lysinophilum		Rhodotorula lysiniphila;Rhodotorula lysinophila		Cystobasidium lysinophilum (Nagahama, Hamamoto, Nakase & Horikoshi) Yurkov, Kachalkin, Daniel, Groenewald, Libkind, de Garcia, Zalar, Gouliamova, Boekhout & Begerow, 2014	0.2	0	0	0.2	0	0	0	0	0	0	0	0.2	0	0	0
256806	162483	genus	Curvibasidium					0.4	0.4	0.5	0.8	0.2	0.5	0.75	0	0.333333	0.2	0.166667	0.8	0.333333	0.833333	0.5
257870	1890244	species	Saitozyma paraflava		Cryptococcus paraflavus;Saitozyma paraflavus		Cryptococcus paraflavus Golubev & Sampaio	0.8	0	0.166667	0	0	0.166667	0.2	0	0	0	0	0.4	0.666667	0.333333	0.25
259858	746524	genus	Arctotheca				Arctotheca J.C.Wendl.	0.2	0	0.166667	0.2	0	0.166667	0.2	0	0.166667	0	0	0	0	0.166667	0
261096	451453	genus	Kappamyces					0	0	0.166667	0.2	0	0	0.2	0	0	0	0	0	0.333333	0.166667	0
265084	718227	genus	Preussia				Preussia Fuckel, 1867	0.4	0.6	0.5	0.4	0.4	0.333333	0	0.333333	1	0.4	0.5	0.4	0.666667	0.333333	0.75
266071	1769459	genus	Pilidium					0	0.2	0	0	0	0	0.75	0	0	0	0	0	0	0.5	0
267215	1909749	species	Genolevuria amylolytica		Cryptococcus amylolyticus		Cryptococcus amylolyticus A. Fonseca, J. Inacio & Spenc.-Mart., 2005;Genolevuria amylolytica (A. Fonseca, J. Inacio & Spenc.-Mart.) X.Z. Liu, F.Y. Bai, M. Groenew. & Boekhout, 2016	0.4	0	0	0.2	0.2	0	0.2	0	0	0	0.333333	0	0.333333	0.166667	0
267217	1909749	species	Genolevuria armeniaca		Cryptococcus armeniacus		Genolevuria armeniaca (A. Fonseca & J. Inacio) X.Z. Liu, F.Y. Bai, M. Groenew. & Boekhout, 2015	1	0	0	0.6	0.6	0.166667	0.4	0	0	0.2	0.333333	0.2	0	0.666667	0.5
268179	1851470	genus	Cryptotrichosporon					0.2	0	0.166667	0.4	0	0	0.4	0.166667	0.333333	0	0	0	0	0.833333	0
268180	268179	species	Cryptotrichosporon anacardii					0.2	0	0.166667	0.2	0	0	0.2	0.166667	0.333333	0	0	0	0	0.666667	0
269607	237584	species	Teratosphaeria mexicana		Mycosphaerella mexicana			0	0	0	0	0	0	0	0	0.333333	0	0	0.4	0.333333	0	0
271836	271835	species	Acarosporina microspora		Schizoxylon microsporum		Schizoxylon microsporum R.W. Davidson & R.C.Lorenz	0	0	0	0	0	0.166667	0	0	0	0	0	0	0	0	0
271885	154566	species	Marchandiomyces lignicola					0.2	0	0.166667	0	0	0	0	0	0	0	0	0	0	0.166667	0
276832	45131	genus	Dothiorella					0	0	0	0	0	0	0	0	0.166667	0	0	0	0	0	0
278090	147544	genus	Teichospora		Floricola;Misturatosphaeria;Ramusculicola			0.2	0.6	0.833333	0.2	0	0	0.2	0.333333	0.5	0	0	0	0	0.166667	0.5
281250	134362	family	Schizothyriaceae					0	0	0	0	0	0	0	0	0.166667	0	0	0	0	0	0
281846	118273	species	Lecophagus sp. ATCC 56071					0.2	0	0	0	0	0	0	0	0	0	0	0	0	0	0
284134	162454	genus	Sarocladium					0.4	0	0	0	0	0.166667	0	0.166667	0	0	0	0	0	0	0
285719	13786	no rank	unclassified Trebouxia		unclassified Trebouxia photobionts			0.2	0.2	0.166667	0.8	0.4	0	0.2	0	0	0	0	0.2	0.666667	0.166667	0.25
285810	221670	genus	Pyrenochaeta					0	0.4	0	0.4	0.2	0	0	0	0	0	0	0.2	0	0	0.5
286399	88746	genus	Polysporina					0	0	0	0	0	0	0	0	0	0	0	0	0	0.166667	0
286400	286399	species	Polysporina simplex					0	0	0	0	0	0	0	0	0	0	0	0	0	0.166667	0
286401	88746	genus	Sarcogyne					0	0	0	0	0.2	0.166667	0	0	0	0	0	0	0	0	0
286661	286660	species	Peltaster fructicola					0	0	0	0	0	0	0	0	0	0	0	0	0.333333	0	0.25
290882	1255046	family	Massarinaceae					0.4	0.2	0.333333	0.6	0.2	0.5	0	0.333333	0.166667	0.2	0.166667	0.8	0.666667	1	0.25
291227	152655	genus	Appendicheirospora					0	0	0	0	0	0	0	0	0	0	0.166667	0	0	0	0
291228	291227	species	Appendicheirospora graminicola					0	0	0	0	0	0	0	0	0	0	0.166667	0	0	0	0
291363	474943	genus	Lecanicillium					0	0	0	0.2	0	0	0	0	0	0	0	0	0	0	0
292188	292187	species	Carestiella socia					1	0	0	0	0	0	0	0	0	0	0	0	0	0	0
292576	222544	order	Coniochaetales					0.8	0.2	0.666667	0.4	0.8	0.666667	0.2	0.333333	0.833333	0.4	0.333333	0.6	1	0.833333	1
296781	28983	genus	Torrendiella					0	0	0	0	0	0	0	0	0	0.2	0	0	0	0	0
296783	54683	species	Lanzia allantospora					0	0	0	0	0	0	0.6	0	0.166667	0	0	0	0	0	0
297313	355688	order	Sebacinales					0	0.2	0	0	0	0.333333	0	0	0	0	0	0	0	0.166667	0
306876	93133	genus	Readeriella					0.2	0.4	0	0.6	0	0	0.6	0.166667	0.333333	0	0	0	0	0.166667	0
307341	89443	species	fungal sp. TRN254					0	0	0	0	0.2	0.166667	0	0	0.333333	0.4	0	0	0.333333	0.166667	0
307351	89443	species	fungal sp. TRN270					0	0	0	0	0.2	0	0	0	0	0	0	0	0	0	0
307369	89443	species	fungal sp. TRN436					0	0	0	0	0	0.166667	0	0	0	0	0	0	0	0	0.25
307370	1664131	species	Ramimonilia apicalis				Ramimonilia apicalis Stielow & Quaedvlieg, 2015	0	0	0	0	0	0	0	0	0	0	0.666667	0	0	0	0.5
307390	89443	species	fungal sp. TRN458					0	0	0.166667	0	0	0	0	0.166667	0	0	0	0	0	0	0
312146	1851509	species	Naganishia randhawae		Cryptococcus randhawai;Cryptococcus randhawii		Cryptococcus randhawai Z.U. Khan, Suh. Ahmad, F. Hagen, Fell, Kowshik, Chandy & Boekhout, 2010;Naganishia randhawae (Z.U. Khan, S.O. Suh. Ahmad, F. Hagen, Fell, Kowshik, Chandy & Boekhout) X.Z. Liu, F.Y. Bai, M. Groenew. & Boekhout,	0	0	0.166667	0	0.4	0.166667	0	0	0.166667	0.2	0	0.2	0.333333	0.666667	0.25
314120	1406929	genus	Vermispora					0	0	0	0	0	0	0	0	0.166667	0	0	0	0	0	0
314149	43216	genus	Acanthostigma					0	0.2	0	0	0	0	0	0	0	0	0	0	0	0.166667	0.25
316340	34395	no rank	unclassified Chaetothyriales					0.2	0.2	0.833333	0.4	0.8	0	0.8	0.166667	0.166667	0.2	0.333333	0	1	0.5	0.5
318751	45153	species	Westerdykella ornata					0	0	0	0	0	0	0	0	0.166667	0	0	0	0	0	0
318860	715298	genus	Pleurophoma					0	0	0.166667	0.6	0	0.166667	0	0.166667	0	0	0.166667	0.4	0	0	0.75
325665	45153	species	Westerdykella nigra					0	0	0	0.2	0	0	0	0	0	0	0	0	0	0	0
329018	81065	species	Gloeoporus dichrous					0	0	0	0	0	0	0	0.166667	0	0	0	0	0	0	0
332221	332217	species	Neochlorosarcina negevensis		Chlorosarcinopsis negevensis		Chlorosarcinopsis negevensis I.Friedmann & R.Ocampo-Paus;Neochlorosarcina negevensis (I.Friedmann & R.Ocampo-Paus) S.Watanabe, 1983	0	0	0	0.2	0	0.166667	0	0	0	0	0.166667	0.2	0.666667	0	0
333827	333826	species	Diptera environmental sample					0	0	0.166667	0	0	0	0	0	0	0	0.166667	0	0	0	0
336780	110846	genus	Pseudombrophila		Fimaria			0.2	0	0	0	0	0	0	0	0	0	0	0	0	0	0
337359	21555	species	Erodium carolinianum				Erodium carolinianum Aldasoro, C.Navarro, P.Vargas, L.Saez & Aedo	0	0	0	0	0	0	0	0.166667	0	0	0	0	0	0	0
344958	43219	genus	Cladoriella					0	0	0	0.2	0	0	0.4	0	0	0	0	0	0	0	0.25
344959	344958	species	Cladoriella eucalypti					0	0	0	0.2	0	0	0.4	0	0	0	0	0	0	0	0
355688	155619	no rank	Agaricomycetes incertae sedis					0.8	0.6	0.5	0.6	1	0.833333	0.6	0.666667	0.666667	0.6	0.5	0.6	1	0.666667	1
356988	5020	genus	Sclerostagonospora					0	0	0	0.2	0	0	0	0	0	0	0	0	0	0	0.25
361670	361669	species	Hemiflagellochloris kazakhstanica					0	0	0	0	0	0	0	0	0	0	0	0	0	0.166667	0
364733	364710	species	Endocarpon pusillum					0	0	0	0	0	0	0	0	0	0	0.166667	0	0.333333	0.333333	0
365329	1909748	species	Fonsecazyma mujuensis		Cryptococcus mujuensis		Cryptococcus mujuensis K.S. Shin & Y.H. Park 2006;Fonsecazyma mujuensis (K.S. Shin & Y.H. Park) X.Z. Liu, F.Y. Bai, M. Groenew. & Boekhout, 2015	0.4	0	0.166667	0	0	0	0	0.166667	0.166667	0	0	0	0	0	0.5
366620	89802	species	Hyphoderma orphanellum					0.2	0	0	0	0	0	0	0	0	0	0	0	0	0.166667	0
366629	68802	species	Hyphodontia subalutacea		Hyphodontia sp. 1 LR-2015			0	0	0	0	0	0	0	0	0	0	0	0	0.333333	0	0
371108	1450292	genus	Saccharata				Saccharata Denman & Crous	0.4	0.2	0.833333	0.2	0.6	0	0	0	0.166667	0	0.166667	0.2	0	0.5	0.5
371113	45131	genus	Tiarosporella					0	0.2	0	0	0.2	0.166667	0	0.333333	0	0	0.166667	0	0	0	0
371114	371113	species	Tiarosporella graminis				Tiarosporella graminis (Piroz. & Shoemaker) Nag Raj	0	0	0	0	0.2	0.166667	0	0.333333	0	0	0	0	0	0	0
385117	89443	species	fungal endophyte sp. SS-1353					0.4	0.2	0	0	0	0	0.2	0	0	0	0	0.4	0.333333	0	0
388283	1520881	subclass	Ostropomycetidae					1	0.4	0.333333	0.4	0.8	0.166667	0.6	0	0.333333	0	0	0.2	0	0.833333	1
388435	1520881	subclass	Lecanoromycetidae					1	0.6	1	0.2	0.8	0	0.2	0.666667	0.333333	0.2	0.333333	0	0.666667	0.166667	0.25
391237	5304	genus	Peniophorella					0	0	0	0	0.4	0	0	0	0	0	0	0	0.333333	0.166667	0
394858	1909749	species	Genolevuria bromeliarum		Cryptococcus bromeliarum		Cryptococcus bromeliarum M. F. Landell & P. Valente 2009;Genolevuria bromeliarum (Landell & P. Valente) X.Z. Liu, F.Y. Bai, M. Groenew. & Boekhout, 2016	0	0	0	0	0.4	0	0	0	0	0	0.166667	0	0	0	0
396331	5303	family	Phanerochaetaceae		Bjerkanderaceae;Hapalopilaceae			0	0.2	0.166667	0	0	0	0	0	0.166667	0.2	0	0	0	0	0.5
404203	89443	species	soil fungal sp. ANG34					0	0	0	0.2	0	0	0	0	0	0	0	0	0	0	0
405928	5186	genus	Hydnobolites					0	0	0	0.2	0	0	0	0	0	0	0	0	0	0.166667	0
406764	47218	species	Saccobolus dilutellus					0	0	0	0	0	0	0	0	0	0	0.166667	0	0	0.166667	0.25
407088	407949	species	Fusculina eucalypti				Fusculina eucalypti Crous & Summerell, 2009	0	0	0	0.6	0.2	0.166667	0.6	0	0	0	0	0.2	0	0.333333	0
[truncated: 828 more rows]
